# Supplementary material for: Whole Genome Sequence of an Edible Mushroom Stropharia rugosoannulata (Daqiugaigu)
Source: J Fungi (Basel). 2022 Jan 20;8(2):99. doi: 10.3390/jof8020099 (PMC8880121; doi:10.3390/jof8020099)
Supplement: Supplementary file 1 [file jof-08-00099-s001.zip]

Archive with 6 entries (6 files):
- Supplementary File(s)/Supplemental Materials.pdf
- Supplementary File(s)/Table S4.xlsx
- Supplementary File(s)/Table S5.xlsx
- Supplementary File(s)/Table S6.xlsx
- Supplementary File(s)/Table S7.xlsx
- Supplementary File(s)/Table S8.xlsx
