# Supplementary material for: Whole Genome Sequence of an Edible Mushroom Stropharia rugosoannulata (Daqiugaigu)
Source: J Fungi (Basel). 2022 Jan 20;8(2):99. doi: 10.3390/jof8020099 (PMC8880121; doi:10.3390/jof8020099)
Supplement: Supplementary file 1 [file jof-08-00099-s001.zip › Supplementary File(s)/Supplemental Materials.pdf]

# Whole genome sequence of an edible mushroom *Stropharia rugosoannulata* (Daqiugaigu)

Shuwen Li<sup>§1</sup>, Shuxue Zhao<sup>§1</sup>, Chunhui Hu<sup>1</sup>, Chengzhi Mao<sup>1</sup>, Lizhong Guo<sup>1</sup>, Hailong Yu<sup>\*1,2</sup>, and Hao Yu<sup>\*1</sup>

<sup>1</sup>Shandong Provincial Key Laboratory of Applied Mycology, School of Life Sciences, Qingdao Agricultural University, 700 Changcheng Road, Chengyang District, Qingdao 266109, Shandong Province, People's Republic of China; <sup>2</sup>Institute of Edible Fungi, Shanghai Academy of Agricultural Sciences, National Engineering Research Center of Edible Fungi, Shanghai, 201403, China.

Running title: Genome sequence of *Stropharia rugosoannulata*

§Shuwen Li and Shuxue Zhao contributed equally to this work.

\*Corresponding author:

Hao Yu E-mail: yuhaosunshine@163.com

Mailing address: 700 Changcheng Road, Chengyang District, Qingdao, Shandong Province, People's Republic of China

Hailong Yu E-mail: yuhailong@saas.sh.cn

Mailing address: 1000 Jinqi Road, Fengxian District, Shanghai, People's Republic of China

**Keywords:** *Genome*; *Stropharia rugosoannulata*; mushroom, lignin cellulose degradation, CAZymes

**Table S1. Gene prediction of *Stropharia rugosoannulata* genome.** RNA-seq was used to construct the gene prediction model for gene prediction. The model was constructed using Braker software suite.

| Method          | Software     | Species                        | Gene number |
|-----------------|--------------|--------------------------------|-------------|
| Ab initio based | Augustus     |                                | 10,774      |
|                 | Genscan      |                                | 7,866       |
|                 | GeneID       |                                | 13,221      |
|                 | GlimmerHMM   |                                | 13,623      |
|                 | SNAP         |                                | 13,032      |
| RNA-seq based   | PASA         |                                | 20,313      |
|                 | TransDecoder |                                | 22,306      |
| Homology based  | GeMoMa       | <i>Agrocybe aegerita</i>       | 8,720       |
|                 |              | <i>Agrocybe pediades</i>       | 8,704       |
|                 |              | <i>Hypholoma sublateritium</i> | 11,914      |
| Integration     | EVM          |                                | 12,752      |

**Table S2. Sequencing results of the *S. rugosoannulata* MG69 and A15 genomes.**

| Strain                                       | MG69       | A15        |
|----------------------------------------------|------------|------------|
| Total ungapped length(bp)                    | 50,394,922 | 47,892,371 |
| Gaps between scaffolds                       | 0          | 0          |
| Genome coverage:                             | 51x        | 165.4      |
| Number of contigs                            | 17,725     | 20         |
| Contig N50                                   | 8,626      | 3,644,253  |
| Contig L50(bp)                               | 1,461      | 18,990     |
| Total number of chromosomes and plasmids     | 0          |            |
| Number of component sequences (WGS or clone) | 17,452     | 12,752     |

**Table S3. Annotation statistics of genomic functions of *S. rugosoannulata* using different databases.**

| Database             | Number<br>(percentage) | 100<=length<300 | Length>=300 |
|----------------------|------------------------|-----------------|-------------|
| GO_Annotation        | 5,752 (45.1%)          | 1,357           | 4,295       |
| KEGG_Annotation      | 3,330 (26.1%)          | 818             | 2,452       |
| Pfam_Annotation      | 7,672 (60.2%)          | 1,820           | 5,751       |
| Swissprot_Annotation | 6,193 (48.6%)          | 1,365           | 4,753       |
| Nr_Annotation        | 11,599 (91.0%)         | 3,110           | 8,294       |

**Figure S1**

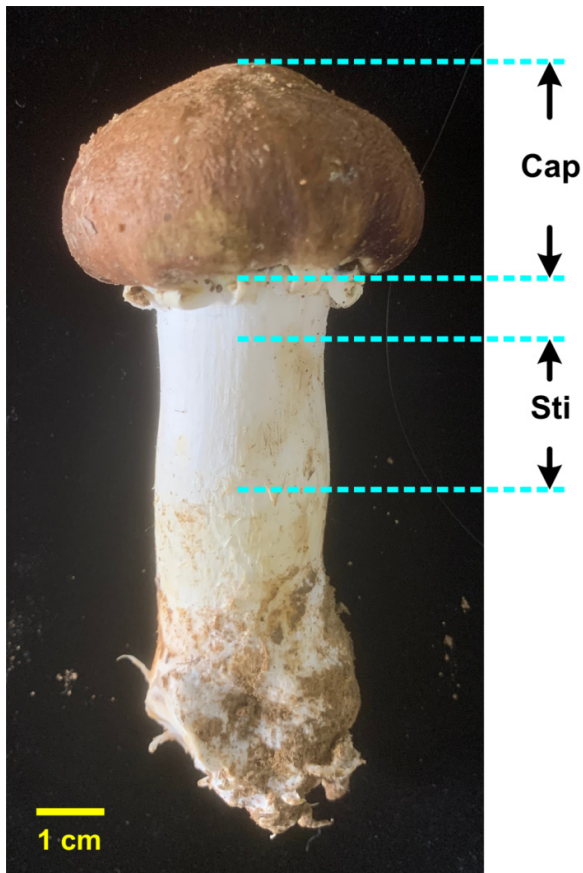

**Figure S1. The position of the tissue for proteomic analysis.** Cap, Cap (pileus) of the fruiting body;

Sti, Stipe (stem) of the fruiting body.

**Figure S2**

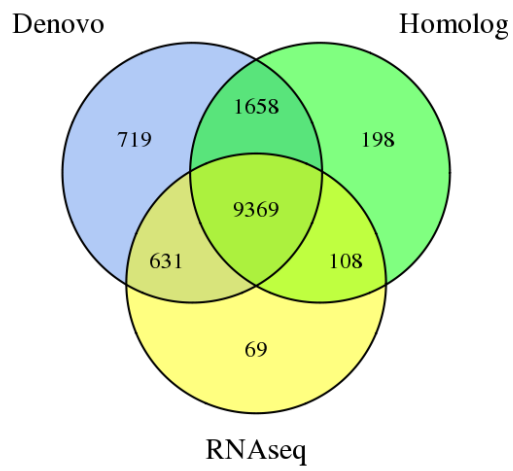

**Figure S2.** The integrated genes were derived from the statistical plots of three predictive method.
