# Supplementary material for: Whole Genome Sequence of an Edible Mushroom Stropharia rugosoannulata (Daqiugaigu)
Source: J Fungi (Basel). 2022 Jan 20;8(2):99. doi: 10.3390/jof8020099 (PMC8880121; doi:10.3390/jof8020099)
Supplement: Supplementary file 1 [file jof-08-00099-s001.zip › Supplementary File(s)/Table S4.xlsx]

## Sheet: Sheet1
Table S4 Number of CAZymes identified in S. rugosoannulata and other 14 fungi.
Strain name	Species abbreviation	auxiliary activities enzymes (AAs)	carbohydrate-binding modules (CBMs)	carbohydrate esterases (CEs)	glycoside hydrolases (GHs)	glycosyl transferases (GTs)	polysaccharide lyases (PLs)	Total CAZymes number		AA1	AA2	AA3	AA4	AA5	AA6	AA7	AA8	AA9	AA10	AA11	AA12	AA13	AA14	AA16	CBM1	CBM13	CBM20	CBM21	CBM67	CE1	CE2	CE3	CE4	CE5	CE8	CE9	CE12	CE14	CE15	CE16	CE17	GH1	GH2	GH3	GH5	GH6	GH7	GH9	GH10
Agaricus bisporus var. burnettii JB137-S8	Abis	97	8	32	177	54	12	380		13	5	37	1	9	4	13	0	11	0	0	1	0	2	1	0	7	0	1	0	2	0	0	8	6	2	1	2	0	1	9	1	1	2	8	19	1	1	1	2
Coprinopsis cinerea okayama7#130	Ccin	128	15	47	190	72	19	471		16	4	35	0	6	3	18	4	34	0	0	4	0	4	0	1	11	0	5	0	5	1	2	16	6	0	1	1	0	8	5	1	2	2	7	25	5	6	1	6
Ganoderma lucidum G.260125-1	Gluc	100	2	27	261	64	14	468		15	10	34	2	9	1	8	2	14	0	0	0	0	5	0	0	0	0	2	0	1	1	0	4	0	3	1	1	0	2	13	1	3	4	11	19	1	3	2	6
Galerina marginata CBS 339.88	Gmar	155	20	43	290	72	12	592		9	34	40	1	16	3	28	0	18	1	0	1	0	3	1	0	10	0	1	8	3	2	0	11	6	3	1	4	1	1	10	1	5	3	11	36	3	8	1	8
Hericium alpestre DSM 108284	Halp	74	3	19	157	52	10	315		5	6	34	0	4	2	8	1	12	0	0	1	0	1	0	2	0	1	0	0	3	0	0	5	0	2	1	0	0	0	7	1	2	3	10	15	2	2	1	0
Hypsizygus marmoreus 51987-8	Hmar	121	9	22	213	69	22	456		20	6	48	1	5	1	11	0	23	0	0	2	0	3	1	0	8	0	1	1	2	0	0	6	0	3	1	2	0	2	5	1	3	3	10	18	1	4	1	5
Hypholoma sublateritium FD-334 SS-4	Hsub	131	14	34	204	69	13	465		13	22	41	1	10	5	19	0	13	2	0	1	0	4	0	0	8	0	2	4	3	1	0	12	2	4	1	2	0	2	7	0	3	3	9	27	1	3	1	5
Lentinula edodes NBRC 111202	Ledo	92	7	28	247	65	11	450		16	10	27	1	5	2	11	2	13	0	0	0	0	5	0	1	0	0	3	3	2	0	1	7	0	4	1	1	0	1	7	4	2	3	13	25	1	3	1	3
Psilocybe cyanescens2631	Pcya	122	9	41	202	73	11	458		18	10	42	1	11	4	14	0	17	0	0	0	2	3	0	0	4	1	1	3	5	2	0	10	3	2	2	3	0	3	10	1	4	2	9	24	2	5	1	5
Pleurotus ostreatus PC15	Post	137	22	27	233	63	26	508		12	9	43	1	15	2	23	0	28	0	0	1	0	2	1	0	13	0	2	7	3	1	0	10	0	2	1	2	0	1	6	1	3	3	12	21	3	15	1	3
Stereum hirsutum FP-91666 SS1	Shir	129	1	29	275	68	20	522		20	8	52	1	8	1	16	1	16	0	0	0	0	3	3	0	0	0	1	0	2	1	0	6	0	4	1	3	0	1	10	1	3	3	16	20	1	3	1	6
Serpula lacrymans	Slac	47	0	14	167	54	7	289		6	1	14	2	3	2	8	2	5	0	0	0	0	3	1	0	0	0	0	0	1	1	0	4	0	2	1	0	0	0	4	1	2	2	9	20	1	0	1	1
Stropharia rugosoannulata A15	Srug	147	5	38	212	69	15	486		12	24	47	0	11	5	25	0	12	5	0	1	1	4	0	1	0	0	2	2	4	2	0	10	5	4	1	2	0	2	7	1	3	3	9	25	1	4	1	4
Tremella mesenterica ATCC 28783	Tmes	15	2	12	73	64	5	171		4	2	2	0	2	1	1	0	0	0	1	0	0	2	0	0	0	0	2	0	2	0	0	5	0	0	1	0	0	0	1	3	1	1	3	13	0	0	1	0
Volvariella volvacea	Vvol	134	10	34	233	67	30	508		11	11	33	4	5	2	26	0	33	0	0	3	0	3	3	1	5	0	3	1	5	1	3	10	1	3	1	1	0	1	7	1	3	3	11	22	5	13	1	18
[truncated: 100 more columns]
