# Supplementary material for: Whole Genome Sequence of an Edible Mushroom Stropharia rugosoannulata (Daqiugaigu)
Source: J Fungi (Basel). 2022 Jan 20;8(2):99. doi: 10.3390/jof8020099 (PMC8880121; doi:10.3390/jof8020099)
Supplement: Supplementary file 1 [file jof-08-00099-s001.zip › Supplementary File(s)/Table S5.xlsx]

## Sheet: Sheet1
Table S5 Normalized protein abundance detected in proteomic analysis.
protein id	Cap-1	Cap-2	Sti-1	Sti-2	foldChange_Cap-1_vs_Sti-1	p-value_Cap-1_vs_Sti-1	q_value (BH FDR)_Cap-1_vs_Sti-1
MDBSrug1_06262.1	317.459	354.667	0.429892	0.420555	0.00126531	0.0352506	0.00554998
MDBSrug1_03879.1	76.8236	86.7615	0.20702	0.167882	0.00229178	0.0387135	0.00645728
MDBSrug1_00750.1	19.658	14.1178	0.0452676	0.0616217	0.00316467	0.103822	0.0394086
MDBSrug1_07619.1	120.674	118.674	0.496172	0.372463	0.00362917	0.00516544	0.000120782
MDBSrug1_11616.1;MDBSrug1_11228.1;MDBSrug1_03352.1	47.8096	33.1548	0.616895	0.168855	0.00970488	0.114813	0.0459072
MDBSrug1_03899.1	2.03548	1.90051	0.0327618	0.0220616	0.0139287	0.0213345	0.00211183
MDBSrug1_02029.1	26.994	31.2436	0.628065	0.395617	0.0175777	0.0465924	0.0088609
MDBSrug1_03179.1	15.705	14.774	0.289026	0.249755	0.0176771	0.0195758	0.00167836
MDBSrug1_01884.1	1.55841	1.7704	0.0230876	0.043584	0.0200286	0.0395861	0.0067571
MDBSrug1_09950.1	0.245559	0.200985	0.00536228	0.00425948	0.0215472	0.0645771	0.0158045
MDBSrug1_08334.1	14.5105	17.0125	0.806635	0.0753497	0.0279791	0.0370597	0.00606588
MDBSrug1_04910.1;REV__MDBSrug1_00357.1	5.0957	4.72914	0.130148	0.161557	0.0296905	0.0234779	0.00250699
MDBSrug1_01644.1	0.44843	0.427057	0.0175345	0.0102972	0.0317899	0.00791497	0.000289948
MDBSrug1_09188.1;MDBSrug1_00290.1	9.37053	8.52077	0.271639	0.316392	0.0328668	0.0307967	0.00444068
MDBSrug1_11281.1;MDBSrug1_12401.1	2.06426	2.12795	0.0233273	0.115516	0.0331194	0.00147952	4.61268e-06
MDBSrug1_09318.1	251.478	341.599	10.4054	9.37604	0.0333538	0.0992264	0.0359628
MDBSrug1_02250.1	19.5343	24.5373	1.02704	0.64176	0.0378656	0.0732751	0.020332
MDBSrug1_09362.1	12.2772	12.4678	0.442098	0.510075	0.0384793	0.00175705	8.21693e-06
MDBSrug1_07977.1	6.4507	5.95048	0.303972	0.204075	0.0409676	0.0216066	0.00218929
MDBSrug1_01751.1	13.7595	12.2225	0.544106	0.646544	0.0458259	0.0386071	0.00640944
MDBSrug1_00224.1	7.72985	7.50313	0.355058	0.345238	0.0459724	0.00979344	0.000435095
MDBSrug1_10798.1	3.69249	3.69641	0.239616	0.187079	0.057748	0.00457214	9.26544e-05
MDBSrug1_03370.1	6.86822	5.37991	0.469431	0.263272	0.0598216	0.076961	0.0226144
MDBSrug1_06950.1	9.77033	12.7524	0.853682	0.504723	0.0603126	0.0854813	0.0273833
MDBSrug1_02532.1	0.386617	0.437137	0.0378592	0.0120916	0.0606381	0.0153132	0.00100258
MDBSrug1_06105.1	4.53073	4.50899	0.118475	0.447273	0.0625847	0.0240916	0.00264763
MDBSrug1_02820.1	9.86673	12.6932	0.915227	0.510521	0.0631982	0.0793855	0.024255
MDBSrug1_10406.1	17.3637	17.4707	0.732552	1.80596	0.0728737	0.0199472	0.00180349
MDBSrug1_01453.4	1.93847	1.91639	0.0487813	0.256955	0.0793119	0.0353505	0.00559326
MDBSrug1_05650.1	0.561069	0.678372	0.0499871	0.0546969	0.0844606	0.0651897	0.0162085
MDBSrug1_01654.2	142.472	146.181	11.7439	12.956	0.0855696	0.0040829	7.63754e-05
MDBSrug1_04935.1	66.825	66.8298	6.96638	4.65315	0.0869369	0.0120656	0.000639484
MDBSrug1_09101.1	4.07634	3.28401	0.505899	0.135398	0.0871287	0.0399261	0.00684625
MDBSrug1_12576.1	5.39519	4.45134	0.609387	0.24877	0.0871532	0.0412272	0.00726216
MDBSrug1_08615.1	9.916	9.67615	0.681658	1.14348	0.0931567	0.00374487	5.5458e-05
MDBSrug1_06725.1	47.5048	41	3.75485	4.58099	0.0941852	0.0482322	0.00947351
MDBSrug1_02153.1	15.3534	11.469	1.15131	1.37653	0.0942437	0.0999816	0.0365482
MDBSrug1_00599.1	14.5839	16.494	1.5704	1.57843	0.101321	0.0434686	0.00799579
MDBSrug1_09212.1	2.85493	2.61337	0.0786996	0.489195	0.103852	0.0182157	0.00147656
MDBSrug1_03104.1	0.961331	1.05925	0.0887229	0.123272	0.104918	0.0193454	0.00164353
MDBSrug1_06190.1	1.38112	1.0831	0.171428	0.0916927	0.106777	0.0691829	0.0183877
MDBSrug1_00095.1	5.01559	6.57029	0.387136	0.859031	0.107559	0.0738212	0.0206561
MDBSrug1_03958.2	1.92787	1.57712	0.0967415	0.294725	0.111688	0.0305812	0.0043381
MDBSrug1_00305.1	1.50408	1.2362	0.134693	0.177255	0.113838	0.0640462	0.0154749
MDBSrug1_12002.1	8.4015	8.55435	1.32278	0.662193	0.117067	0.0212124	0.00208322
MDBSrug1_09615.1	7.21415	5.43352	0.746422	0.758767	0.119009	0.100868	0.0372655
MDBSrug1_10060.1	9.39569	8.04269	1.05485	1.11948	0.124687	0.0557754	0.0120854
MDBSrug1_01392.1	28.8974	35.6858	3.86507	4.34016	0.127049	0.075042	0.0215241
MDBSrug1_04678.1	304.987	316.079	42.771	38.8064	0.131351	0.00568825	0.000146307
MDBSrug1_00324.1	99.0076	101.03	13.5507	12.7865	0.131661	0.00251168	2.3492e-05
MDBSrug1_01972.1	2.565	2.13364	0.0938677	0.536671	0.134196	0.02236	0.00233534
MDBSrug1_04522.1	4.8164	4.59545	0.558716	0.710156	0.134816	0.00205978	1.28435e-05
MDBSrug1_06800.1	2.63709	3.59875	0.555313	0.290302	0.135606	0.0932795	0.0319898
MDBSrug1_10560.1	9.56227	9.1753	1.12956	1.42477	0.136322	0.0013145	3.07366e-06
MDBSrug1_08127.1	0.084249	0.133193	0.0262196	0.00398159	0.138893	0.119543	0.0488235
MDBSrug1_12264.1	0.383498	0.288685	0.031495	0.0627569	0.140218	0.0785739	0.023762
MDBSrug1_12683.1;MDBSrug1_07019.1	4.27058	5.17137	0.697452	0.646098	0.142296	0.0697198	0.0186934
MDBSrug1_04108.1	3.43773	4.31423	0.475977	0.630043	0.142676	0.0757837	0.0219731
MDBSrug1_02506.1	2.13639	2.10455	0.248408	0.394109	0.151503	0.0198907	0.00178288
MDBSrug1_00218.1	2.54586	2.40956	0.411399	0.342396	0.152115	0.00551473	0.000133248
MDBSrug1_01764.1	1.64627	1.61121	0.216233	0.283803	0.153504	0.00343434	4.55056e-05
MDBSrug1_08912.1;MDBSrug1_02775.1	10.1311	11.7649	2.22099	1.16785	0.154769	0.0176319	0.00134679
MDBSrug1_08552.1	4.07812	3.7963	0.364467	0.863896	0.155994	0.01628	0.00114201
MDBSrug1_01267.3	2.61452	2.56301	0.334789	0.490047	0.159311	0.0123962	0.000666672
MDBSrug1_07760.1	238.406	261.588	42.9005	37.1689	0.16014	0.0262288	0.0030665
MDBSrug1_12698.1;MDBSrug1_06001.1	17.0206	17.4462	2.21637	3.36886	0.162047	0.0125089	0.000682481
MDBSrug1_08478.1	16.2235	14.7621	1.96423	3.32577	0.170724	0.00610296	0.000171244
MDBSrug1_07664.1	365.244	378.64	76.6949	50.5899	0.171108	0.00796771	0.00029809
MDBSrug1_00129.1	1.56812	1.7671	0.392536	0.180835	0.171914	0.011021	0.000566939
MDBSrug1_11220.1	15.2885	11.3808	1.41269	3.18107	0.172249	0.0715823	0.0195833
MDBSrug1_08927.1	10.1347	9.97553	1.3544	2.27022	0.180238	0.0305313	0.00428343
MDBSrug1_02176.1	0.547459	0.578429	0.0875319	0.116704	0.1814	0.00216122	1.6845e-05
MDBSrug1_10979.1	0.598355	0.472965	0.110789	0.0856071	0.183321	0.0804575	0.0250215
MDBSrug1_02358.1	1.10934	0.907627	0.175881	0.194587	0.183676	0.0754215	0.0217506
MDBSrug1_01710.1	0.94687	0.913717	0.178714	0.166098	0.185324	0.0055592	0.000138655
MDBSrug1_08457.1	8.03041	6.57257	1.44565	1.26102	0.18535	0.0736202	0.0205425
MDBSrug1_08562.1	4.5761	5.61451	0.416392	1.47736	0.185833	0.0305882	0.00436293
MDBSrug1_08487.1	14.3528	10.6255	1.47516	3.16939	0.185944	0.0747957	0.0213369
MDBSrug1_01695.1	8.10271	6.82242	1.54503	1.25672	0.18772	0.0560388	0.0121862
MDBSrug1_09473.1	4.19118	3.70774	0.814883	0.682262	0.189538	0.0352059	0.00551551
MDBSrug1_07759.1	20.3704	20.465	2.61593	5.19076	0.191175	0.0492472	0.00978802
MDBSrug1_04065.1	2.13111	1.4103	0.139217	0.545591	0.193372	0.103281	0.0385594
MDBSrug1_06791.1	42.5285	50.6875	9.24252	8.87127	0.194321	0.068384	0.0178555
MDBSrug1_04194.1;MDBSrug1_06395.1	161.25	161.281	34.8615	28.5279	0.196538	0.015554	0.00106684
MDBSrug1_02077.1	39.8029	39.9954	6.84506	8.93979	0.197809	0.0198064	0.00174444
MDBSrug1_06032.1	3.32222	3.31884	0.876798	0.43734	0.197881	0.0523882	0.010984
MDBSrug1_03770.1	9.72815	7.40922	2.16093	1.32183	0.203226	0.0780197	0.0232904
MDBSrug1_00399.1	1.07542	0.835743	0.159611	0.231608	0.204701	0.0783674	0.0234553
MDBSrug1_02573.1	78.3441	88.8674	17.4172	16.8482	0.204923	0.049674	0.009989
MDBSrug1_03735.1	7.07734	8.44678	1.61272	1.6161	0.207987	0.0706139	0.0191533
MDBSrug1_09877.1	9.66329	11.025	2.03536	2.37705	0.21328	0.0414544	0.00736679
MDBSrug1_04559.1	14.3057	13.3967	3.15238	2.85611	0.216895	0.0153605	0.00101765
MDBSrug1_05243.1	0.431594	0.526238	0.133928	0.0752078	0.218342	0.0333163	0.00495979
MDBSrug1_02981.1	6.15085	4.66226	1.60132	0.771822	0.219469	0.0613318	0.0145322
MDBSrug1_08780.1	0.555221	0.442493	0.116992	0.106215	0.223718	0.0895354	0.0297986
MDBSrug1_00214.1	1.63366	1.86141	0.235008	0.565254	0.228969	0.0288518	0.00380043
MDBSrug1_05551.1	1.64227	1.69169	0.55106	0.214296	0.229563	0.0775289	0.0229626
MDBSrug1_03395.1	0.704792	0.575754	0.19774	0.0964971	0.229775	0.0302012	0.00421357
MDBSrug1_00291.1	5.16233	7.11497	2.13763	0.685263	0.229928	0.0684152	0.017917
MDBSrug1_01694.1	8.14489	7.27661	1.68658	1.86556	0.230337	0.0387934	0.00650083
MDBSrug1_09903.1	29.2617	31.967	6.57247	7.67363	0.23267	0.01771	0.00136655
MDBSrug1_00091.1	0.865138	0.798349	0.189903	0.205327	0.237591	0.0258146	0.00293759
MDBSrug1_08340.1	5.43241	6.12977	1.32396	1.47322	0.241925	0.0419179	0.00754719
MDBSrug1_05625.1	55.3023	49.3796	12.6271	12.9045	0.243897	0.047102	0.00906797
MDBSrug1_12506.1	8.09279	6.26807	1.66868	1.87346	0.246652	0.10282	0.0383071
MDBSrug1_11245.1	4.04976	3.51713	0.911455	0.991121	0.251434	0.0548114	0.0117911
MDBSrug1_07109.1	2.20391	1.73489	0.513888	0.480924	0.252568	0.0991849	0.0358705
MDBSrug1_09705.1	1.57025	1.54234	0.330847	0.456882	0.253078	0.0272019	0.00334988
MDBSrug1_08639.1	0.955412	0.888389	0.190247	0.279858	0.254965	0.00868769	0.000372426
MDBSrug1_08595.1	1.81686	1.83978	0.323538	0.622988	0.258851	0.0686246	0.0180253
MDBSrug1_06081.1	1.37432	1.00404	0.268007	0.348498	0.259214	0.118778	0.0484187
MDBSrug1_03555.1	0.630255	0.612578	0.247198	0.0829434	0.265636	0.110025	0.0432211
MDBSrug1_04317.1	3.88495	3.92299	0.926212	1.15188	0.26615	0.02142	0.00215369
MDBSrug1_06380.1	5.96725	6.8708	1.93731	1.49726	0.267531	0.0286097	0.00374624
MDBSrug1_05558.1	2.13958	1.77467	0.632282	0.415528	0.267691	0.0351273	0.00547581
MDBSrug1_01885.1	0.665273	0.560222	0.102371	0.229114	0.270491	0.0347282	0.00533238
MDBSrug1_07668.2	1.50259	1.35583	0.457817	0.322299	0.272918	0.00930906	0.000406319
MDBSrug1_07839.1	2.58907	3.17837	0.613973	0.96043	0.272981	0.0414602	0.00740014
MDBSrug1_04360.2	2.2643	2.46044	0.491105	0.801581	0.273599	0.0188284	0.00155558
MDBSrug1_08466.1	4.39179	5.30051	1.15046	1.5346	0.277031	0.049782	0.0100495
MDBSrug1_06708.1	9.30779	10.0831	2.79314	2.59777	0.278012	0.0260373	0.00300353
MDBSrug1_11729.1	3.73361	3.49425	0.791434	1.22502	0.278983	0.0196734	0.00170207
MDBSrug1_01666.1	0.954455	1.37154	0.473425	0.176063	0.27923	0.0937042	0.0322085
MDBSrug1_00988.1	3.3209	2.52186	0.755816	0.884168	0.280687	0.1123	0.0443771
MDBSrug1_12559.1	2.1198	2.55009	0.62015	0.692682	0.281127	0.0741208	0.0207977
MDBSrug1_02852.1	0.155543	0.152038	0.0570995	0.029599	0.281872	0.0747696	0.0212712
MDBSrug1_10577.1	10.8595	12.1696	3.60817	2.9297	0.283896	0.0200366	0.0018428
MDBSrug1_06765.1	0.926242	0.760102	0.337467	0.142477	0.284606	0.0443215	0.00825631
MDBSrug1_01311.1	23.2548	19.8429	5.68924	6.65558	0.286438	0.0537619	0.0114396
MDBSrug1_08058.1	9.27589	7.26978	2.56844	2.24922	0.291174	0.100868	0.0371866
MDBSrug1_12278.1	0.707876	0.540899	0.1349	0.230111	0.292296	0.0669453	0.0171146
MDBSrug1_08422.1	55.795	54.5498	17.4084	14.8924	0.292725	0.00572949	0.000156299
MDBSrug1_12131.1	9.19579	9.17871	2.46684	3.00628	0.297865	0.0264581	0.00315518
MDBSrug1_01770.1	23.4894	29.029	9.34867	6.77843	0.307075	0.0572452	0.0126716
MDBSrug1_00092.1	15.0011	12.5196	4.73129	3.76278	0.308643	0.0534158	0.0113243
MDBSrug1_00166.1	1.70472	2.35327	0.332655	0.929252	0.310968	0.0873906	0.0284718
MDBSrug1_12028.1	1.89824	1.77137	0.371935	0.770363	0.311286	0.0762587	0.0223486
MDBSrug1_05493.1	0.58237	0.550603	0.207257	0.149605	0.314978	0.0165609	0.00118753
MDBSrug1_09022.1;MDBSrug1_12347.1	2.37882	2.15754	0.87654	0.554713	0.315507	0.0216402	0.00220956
MDBSrug1_11641.1	2.44439	1.98435	0.778156	0.650841	0.322665	0.0785513	0.0236327
MDBSrug1_12620.1	660.594	665.111	236.261	194.004	0.324556	0.0282895	0.00366022
MDBSrug1_08527.1;REV__MDBSrug1_09658.1	2.02158	2.51047	0.810963	0.660409	0.324659	0.0786621	0.0239113
MDBSrug1_05261.1	12.889	11.8492	4.37881	3.6534	0.324689	0.00868689	0.000365621
MDBSrug1_08132.1	48.7559	53.3005	12.484	20.7115	0.325266	0.0342684	0.00523508
MDBSrug1_08236.1	4.76997	4.07763	1.16496	1.73136	0.327356	0.0240884	0.00262851
MDBSrug1_02510.1	3.76799	3.02043	1.39413	0.854328	0.331219	0.0467906	0.00897154
MDBSrug1_03607.1	13.796	17.9192	6.64386	4.71153	0.358043	0.0839001	0.0265499
MDBSrug1_10338.1	4.51832	4.91924	1.92248	1.47014	0.35948	0.0103295	0.000491115
MDBSrug1_04903.1	0.569115	0.529983	0.148423	0.248096	0.360768	0.0592114	0.0136145
MDBSrug1_11630.1	2.76916	2.05726	0.719532	1.02461	0.361374	0.104786	0.0401013
MDBSrug1_01378.1	2.23595	2.84832	0.626586	1.21269	0.361758	0.0621495	0.0147744
MDBSrug1_09038.1	2.47877	2.68395	0.77786	1.0958	0.362922	0.0205162	0.00195088
MDBSrug1_07508.1	1.1808	1.06369	0.432629	0.383665	0.363689	0.0273889	0.00339426
MDBSrug1_01286.1	45.6546	40.5754	16.7482	14.6179	0.363748	0.0320765	0.00465022
MDBSrug1_00916.1	7.5257	8.27376	2.52957	3.23138	0.36463	0.0104179	0.000503438
MDBSrug1_02131.1	4.27235	4.29294	1.78818	1.34028	0.365248	0.0518749	0.0107955
MDBSrug1_02135.2	5.10385	5.05549	2.28102	1.43827	0.366096	0.0819685	0.025683
MDBSrug1_03912.3	1.82438	1.99892	0.488294	0.92167	0.368782	0.0786229	0.0238381
MDBSrug1_05028.1	18.444	13.119	4.44576	7.224	0.369729	0.116102	0.0466941
MDBSrug1_06299.1	0.474304	0.534861	0.185106	0.191766	0.373449	0.0580582	0.0132136
MDBSrug1_11658.1	89.3067	90.2106	27.9217	39.6181	0.37623	0.0648323	0.015968
MDBSrug1_11647.1	32.8351	31.3597	13.5799	10.6856	0.377998	0.0178869	0.00140808
MDBSrug1_09201.1	3.12682	3.24633	0.99767	1.42177	0.379631	0.0518565	0.0107512
MDBSrug1_07477.1	3.35004	4.25043	0.931797	1.96238	0.380789	0.0770587	0.0227633
MDBSrug1_06555.1	89.1827	77.6779	38.3548	25.9331	0.38528	0.026547	0.00318647
MDBSrug1_01780.1	0.602254	0.628571	0.262814	0.21224	0.385964	0.0154038	0.00103252
MDBSrug1_04080.1	2.8836	3.18583	1.00407	1.33866	0.385988	0.0147632	0.000943555
MDBSrug1_01932.1	345.594	332.368	134.723	127.294	0.386477	0.00425743	8.29585e-05
MDBSrug1_08468.1	1.57415	1.3255	0.588231	0.535779	0.387637	0.0775571	0.0230314
MDBSrug1_07260.1	3.51634	3.21639	1.09232	1.52577	0.388859	0.0221297	0.00229404
MDBSrug1_01876.1	9.90076	10.2254	3.35999	4.63288	0.397139	0.0530086	0.0111967
MDBSrug1_07694.1	1.21624	1.3848	0.494323	0.540807	0.397967	0.0526342	0.0110766
MDBSrug1_04911.1	2.55487	2.01645	0.815882	1.01168	0.399788	0.0928071	0.0316832
MDBSrug1_12200.1	2.6988	2.61246	0.873766	1.26057	0.401851	0.0656253	0.0164703
MDBSrug1_01698.1	1.35514	1.02362	0.303932	0.654652	0.402976	0.0990494	0.0356671
MDBSrug1_01447.1	2.23935	2.22425	1.10497	0.705737	0.40566	0.0946916	0.0328431
MDBSrug1_09556.1	0.469696	0.517604	0.204542	0.199635	0.409376	0.0499882	0.0101301
MDBSrug1_04167.1	5.19104	4.83449	1.98739	2.12439	0.41013	0.0201656	0.0018861
MDBSrug1_02955.1	0.924541	0.922254	0.461368	0.306982	0.416045	0.0904607	0.0302476
MDBSrug1_10266.1	3.39179	2.83694	1.08758	1.5093	0.416921	0.0402999	0.00694175
MDBSrug1_01323.1	10.9843	13.3534	5.96516	4.27853	0.420898	0.0487674	0.00965465
MDBSrug1_07240.1	2.87024	2.77166	1.21807	1.16886	0.423073	0.00513612	0.000116093
MDBSrug1_11200.1	0.285316	0.375378	0.15822	0.123243	0.426012	0.113605	0.04507
MDBSrug1_09761.2	1.56543	1.3786	0.735252	0.522725	0.427298	0.0280815	0.00356764
MDBSrug1_12044.1	1.31155	1.69431	0.514406	0.776201	0.429364	0.079329	0.0241759
MDBSrug1_06749.1	4.1086	3.3066	1.62514	1.56611	0.430366	0.117853	0.0477656
MDBSrug1_02293.1	8.54718	7.28856	3.95828	2.91445	0.434001	0.0341223	0.00515957
MDBSrug1_10915.1	8.25689	9.69664	3.74006	4.14028	0.43893	0.0724004	0.01992
MDBSrug1_06444.1	0.459205	0.534604	0.254274	0.18223	0.439223	0.033426	0.00500218
MDBSrug1_12687.1	20.4282	24.4308	10.2966	9.42429	0.43962	0.0882894	0.0290398
MDBSrug1_04134.2	16.8923	16.2481	6.21889	8.46625	0.443118	0.0594743	0.0137676
MDBSrug1_02600.1	3.8247	3.58964	2.08344	1.20381	0.443364	0.11477	0.0458006
MDBSrug1_02988.1	0.751471	0.610985	0.203229	0.403252	0.445138	0.103606	0.0390036
MDBSrug1_01151.1	9.31594	9.11497	4.13581	4.08514	0.446042	0.00812562	0.000316665
MDBSrug1_00712.1;MDBSrug1_10589.1;MDBSrug1_07909.1	7.47537	8.83096	3.02042	4.36246	0.452761	0.0427933	0.00780486
MDBSrug1_05928.1	18.566	18.7291	8.50686	8.40138	0.453364	0.000291596	2.27276e-07
MDBSrug1_01641.1	10.8489	8.31019	5.57125	3.13035	0.454177	0.0973448	0.0345221
MDBSrug1_03568.1	74.6899	76.6875	37.6854	31.9951	0.46031	0.026568	0.00320969
MDBSrug1_04733.1	21.2749	19.4684	11.0119	7.87918	0.463662	0.0435047	0.00803634
MDBSrug1_10305.1	6.59247	6.92772	2.53556	3.73874	0.464069	0.0857042	0.0275215
MDBSrug1_00639.1	3.44063	3.82237	1.41562	1.97884	0.467362	0.0392185	0.00663322
MDBSrug1_05858.1	3.58581	3.76261	1.37537	2.1072	0.473921	0.103641	0.0390977
MDBSrug1_05414.1	0.365528	0.462925	0.239109	0.155751	0.476624	0.0799637	0.0245563
MDBSrug1_09840.1	40.8131	46.7604	19.9197	21.9996	0.478676	0.0575785	0.0129698
MDBSrug1_01214.1	18.7761	20.1377	10.4135	8.27569	0.480271	0.0241729	0.00267541
MDBSrug1_01908.1	2.79209	3.05635	1.54044	1.3014	0.485915	0.0141728	0.000894776
MDBSrug1_05712.1	51.1555	43.8924	23.1106	23.0805	0.485976	0.0939465	0.0323651
MDBSrug1_11280.1	6.62366	6.24132	2.96279	3.30517	0.487211	0.00627867	0.000181068
MDBSrug1_09224.1	3.69887	4.30609	1.90398	1.99797	0.487442	0.0872096	0.0282768
MDBSrug1_04667.1	4.60445	4.75367	2.12305	2.45372	0.48907	0.0198178	0.00176089
MDBSrug1_06329.1	1.71014	1.7288	0.8029	0.888992	0.49198	0.0247518	0.00279736
MDBSrug1_09926.1	4.61438	4.55088	2.64989	1.87144	0.493311	0.103835	0.0395754
MDBSrug1_00959.1	3.28436	4.20643	1.61911	2.08072	0.493918	0.103773	0.0392283
MDBSrug1_11528.1	1.58964	1.53625	0.639457	0.904804	0.494023	0.0950635	0.0331203
MDBSrug1_02085.1;MDBSrug1_00242.1	7.60367	8.11781	4.01228	3.76477	0.494676	0.0164897	0.00116958
MDBSrug1_01283.1	4.46941	3.83608	1.66749	2.46617	0.497702	0.0596896	0.0139105
MDBSrug1_08225.1	19.0912	18.576	10.8906	8.0446	0.502698	0.0874187	0.0285491
MDBSrug1_09506.1	0.968845	0.837223	0.379332	0.53582	0.50671	0.0514428	0.0105853
MDBSrug1_01603.1	0.961402	0.815139	0.340863	0.560673	0.507467	0.0965268	0.0340063
MDBSrug1_09247.1	116.995	102.76	58.9304	52.8563	0.508686	0.0504876	0.01031
MDBSrug1_02017.1	94.2263	92.9937	46.4844	49.0695	0.510383	0.0051044	0.000111398
MDBSrug1_07067.1	33.2955	36.2163	21.4965	14.3941	0.516323	0.0955171	0.0335017
MDBSrug1_00619.1	3.80272	3.46682	2.0503	1.70399	0.516442	0.0183668	0.00150313
MDBSrug1_11568.1	1.67158	2.1247	1.14295	0.818488	0.516674	0.0925372	0.0313746
MDBSrug1_06566.1	5.95662	5.32863	2.90417	3.00061	0.52323	0.068296	0.0177261
MDBSrug1_01726.1	19.3684	23.4286	9.0354	13.4652	0.525753	0.0784007	0.0235263
MDBSrug1_05447.1	177.727	167.285	97.496	85.1368	0.529351	0.0107149	0.000534494
MDBSrug1_12719.1	12.2694	12.473	7.26634	5.98297	0.53549	0.0648837	0.0160819
MDBSrug1_10069.1	3.49483	3.69425	1.75996	2.11056	0.538389	0.027437	0.0034216
MDBSrug1_01124.1	4.72531	5.25879	2.72175	2.67253	0.540287	0.0715483	0.0195182
MDBSrug1_03994.1;MDBSrug1_02740.1	2.40232	2.49163	1.14181	1.50278	0.540378	0.085934	0.0276623
MDBSrug1_06388.1	274.704	266.135	146.766	151.628	0.551723	0.0049154	0.000103442
MDBSrug1_04555.1	8.29943	7.17587	4.1299	4.44719	0.554244	0.0834269	0.026205
MDBSrug1_06419.1	6.37875	6.67615	3.55376	3.68259	0.554301	0.0138651	0.000842931
MDBSrug1_00340.1	1.00684	0.952703	0.491512	0.607744	0.560975	0.0484077	0.00954571
MDBSrug1_07488.1	9.15361	9.6272	5.26427	5.3655	0.565991	0.029798	0.00408764
MDBSrug1_00008.1	1.70111	1.60228	0.958908	0.923779	0.569927	0.0262175	0.00304475
MDBSrug1_11180.1	0.937442	1.09767	0.46784	0.692074	0.569952	0.0982153	0.035137
MDBSrug1_10896.1	24.48	20.8754	11.3064	14.5465	0.570007	0.0576381	0.0130281
MDBSrug1_00855.1	46.8243	41.5162	25.8261	24.5396	0.570132	0.074321	0.0209118
MDBSrug1_07148.1	60.0872	66.2151	39.7566	32.3162	0.570638	0.0326952	0.00481637
MDBSrug1_11565.1	22.0181	22.6318	13.9727	11.6392	0.573615	0.0622989	0.0148585
MDBSrug1_07524.1	22.5363	19.6244	13.8077	10.5469	0.577663	0.0565107	0.0123769
MDBSrug1_03704.1	3.51818	3.87883	2.16448	2.11904	0.579087	0.0695395	0.0185908
MDBSrug1_12302.1	2.79744	3.03216	1.51563	1.8744	0.581519	0.040878	0.00713693
MDBSrug1_06892.1;MDBSrug1_02672.1	17.2223	18.7803	10.233	10.7306	0.58228	0.0463237	0.0087737
MDBSrug1_12289.1	2.4547	2.43643	1.54248	1.35017	0.591408	0.0590145	0.0135232
MDBSrug1_04341.1	12.7458	13.424	7.71831	7.78066	0.592246	0.0388624	0.0065427
MDBSrug1_06847.1	2.31236	2.64365	1.25709	1.67829	0.592286	0.0692229	0.0184522
MDBSrug1_05406.3	1.75161	1.5963	1.01087	0.98654	0.596615	0.0670392	0.0171909
MDBSrug1_10797.1	3.76303	3.45157	2.12657	2.19327	0.598764	0.0581354	0.0132764
MDBSrug1_04442.1	49.1777	49.2698	31.6592	27.4819	0.600737	0.0672864	0.0173067
MDBSrug1_00077.1	6.103	7.05635	4.4084	3.51579	0.602172	0.0573758	0.0127452
MDBSrug1_11848.1	4.4003	4.01827	2.14306	2.98046	0.608598	0.115044	0.0461791
MDBSrug1_06724.1	4.65124	5.1358	3.08322	2.88409	0.609715	0.0495012	0.0098771
MDBSrug1_10301.1	0.195609	0.212925	0.135818	0.113618	0.610564	0.0340019	0.00511486
MDBSrug1_07062.1	10.7557	9.58281	5.50098	7.15792	0.622412	0.0743677	0.0209829
MDBSrug1_07459.1	24.3	28.1969	18.9862	14.6779	0.641258	0.0845196	0.0269435
MDBSrug1_03642.1	45.24	47.6204	31.6862	28.3807	0.646852	0.0197835	0.00172701
MDBSrug1_10709.1	12.335	12.3557	7.74901	8.22948	0.647145	0.0347543	0.00536349
MDBSrug1_01987.1	17.9723	18.202	11.8937	11.6375	0.650496	0.000792425	1.23527e-06
MDBSrug1_07715.1	2.24931	1.87262	1.50786	1.19615	0.656005	0.105272	0.0404514
MDBSrug1_00427.1	4.62217	5.15219	3.62899	2.79015	0.656732	0.0973473	0.0345989
MDBSrug1_04156.1;MDBSrug1_07957.1;MDBSrug1_01829.1	63.5252	57.2965	44.2912	35.3383	0.659066	0.0756175	0.021866
MDBSrug1_00255.1	10.6057	10.0313	6.6875	7.11372	0.66876	0.0139041	0.000856139
MDBSrug1_02266.1	4.59169	4.11241	3.0628	2.82376	0.676298	0.0631801	0.0151672
MDBSrug1_03459.1	21.4627	19.6386	13.3406	14.5437	0.678428	0.0365528	0.00586896
MDBSrug1_05171.1	7.55051	7.30279	4.59999	5.5451	0.68302	0.10804	0.0421044
MDBSrug1_08289.1	127.724	108.731	71.0212	91.3035	0.686494	0.116986	0.047232
MDBSrug1_07611.1	22.4353	20.7684	15.4418	14.5348	0.693843	0.0377392	0.00623594
MDBSrug1_04260.1	4.15928	3.95344	2.73969	2.90533	0.695823	0.0129787	0.000758692
MDBSrug1_07471.1	19.4014	17.6955	13.0181	12.8105	0.696246	0.0916277	0.0309235
MDBSrug1_03017.1	0.298182	0.316414	0.223105	0.206304	0.698686	0.0177798	0.0013858
MDBSrug1_00347.1	2.80967	2.40979	1.70178	1.95585	0.700768	0.100764	0.0370697
MDBSrug1_07099.1	14.6257	12.704	9.0132	10.3073	0.706941	0.0894993	0.0297168
MDBSrug1_04498.1	1.20795	1.29556	0.945445	0.834219	0.710868	0.0403856	0.00701948
MDBSrug1_08516.1	15.7915	14.868	10.5833	11.3282	0.714674	0.0201638	0.00187022
MDBSrug1_08928.1	0.888708	0.869949	0.639753	0.642003	0.728827	0.0231059	0.00244927
MDBSrug1_09667.1	27.2585	25.4843	18.3741	20.5283	0.737586	0.0412115	0.00722726
MDBSrug1_01872.1	1.8051	1.76483	1.34693	1.32479	0.748398	0.00761187	0.000266979
MDBSrug1_00120.1	2.90345	2.93381	2.27877	2.09998	0.750137	0.0706514	0.0192185
MDBSrug1_01105.1	1.62253	1.77365	1.1806	1.3702	0.751081	0.0785635	0.0236976
MDBSrug1_02397.1	16.1533	16.1668	12.3882	11.9696	0.753643	0.0332674	0.00492659
MDBSrug1_08359.1	53.4309	52.9579	39.0946	41.5893	0.758387	0.0538877	0.0115504
MDBSrug1_06363.1;REV__MDBSrug1_07239.1	21.8895	22.3603	16.6202	17.2216	0.76479	0.00663143	0.000201579
MDBSrug1_00269.1	10.3027	11.1628	7.65322	8.82668	0.76774	0.0853068	0.0272609
MDBSrug1_03391.1	1.07067	1.01019	0.892074	0.782283	0.804646	0.114914	0.0460373
MDBSrug1_01775.1	9.94046	10.3495	7.97759	8.76951	0.82539	0.0908078	0.0305052
MDBSrug1_04988.1	6.18416	5.63637	5.10818	4.66734	0.826996	0.106026	0.0409063
MDBSrug1_07487.2	1.27731	1.24206	1.03148	1.0521	0.827022	0.0173617	0.00129908
MDBSrug1_05193.1	5.90806	5.94878	4.90032	5.03264	0.837741	0.0292394	0.00391986
MDBSrug1_00385.1	1.07418	1.05373	0.973296	0.934888	0.89674	0.0625618	0.01497
MDBSrug1_09122.1	36.0318	35.8469	32.1326	33.0805	0.907267	0.0803211	0.0247912
MDBSrug1_05873.1	29.6392	29.9602	27.5182	26.8182	0.911694	0.0480408	0.00936102
MDBSrug1_01420.1	7.4821	7.06431	8.60783	8.71113	1.1906	0.0802021	0.024692
MDBSrug1_04415.1	0.504466	0.487809	0.597736	0.59027	1.19726	0.0266032	0.00323468
MDBSrug1_12430.1	11.2341	12.1252	14.6936	13.3432	1.20024	0.119774	0.049011
MDBSrug1_03728.1	10.1301	9.08594	11.8634	11.2171	1.20111	0.110194	0.0433732
MDBSrug1_01056.1	29.4588	28.2168	33.9598	35.5719	1.20556	0.0325724	0.00474749
MDBSrug1_00481.1	12.6373	12.4121	15.6079	15.0562	1.22414	0.0356406	0.00566693
MDBSrug1_02872.1;MDBSrug1_11901.1;MDBSrug1_00104.1	38.7503	37.5777	45.2824	48.956	1.23465	0.103561	0.0388253
MDBSrug1_01161.1	27.8344	29.2151	35.2861	35.3444	1.23806	0.0640769	0.0155822
MDBSrug1_06648.1	8.01588	7.41776	9.865	9.40645	1.24867	0.0416544	0.00746727
MDBSrug1_01191.1	84.8019	83.9556	109.346	101.472	1.24924	0.11447	0.0455916
MDBSrug1_05962.1	138.378	151.269	172.471	191.822	1.25771	0.101351	0.0376018
MDBSrug1_04956.1	26.8384	28.4189	34.209	35.6805	1.2648	0.0213714	0.00213214
MDBSrug1_08519.1	44.1164	40.7911	53.2788	56.7606	1.29599	0.0349509	0.00542106
MDBSrug1_05032.1	22.0369	24.0341	30.4572	29.4535	1.3004	0.0496663	0.00994874
MDBSrug1_11937.1	40.37	44.0057	58.9193	55.224	1.3528	0.0290311	0.00386931
MDBSrug1_02161.1	5.13291	4.69254	6.68158	6.76262	1.3683	0.0689886	0.0181747
MDBSrug1_03167.1	63.9541	63.1873	89.0927	85.2382	1.37116	0.0442049	0.00820012
MDBSrug1_07590.1	12.3588	12.3819	17.6362	16.2895	1.37125	0.0926001	0.0314681
MDBSrug1_08848.1	13.219	11.9163	17.4021	17.0772	1.37175	0.0733876	0.0204204
MDBSrug1_07454.1	22.2847	20.1685	31.7887	27.6339	1.39972	0.103825	0.0394908
MDBSrug1_04541.1	9.79939	10.5128	15.0179	13.94	1.42564	0.0307262	0.00440656
MDBSrug1_08401.1	10.8127	10.2106	14.1184	16.002	1.43272	0.104636	0.0399623
MDBSrug1_10645.1	0.851634	0.69243	1.02556	1.21593	1.45168	0.110443	0.0435575
MDBSrug1_02795.1	7.25207	6.786	9.7141	10.7683	1.45906	0.065463	0.0163275
MDBSrug1_05191.1	48.3909	38.6881	67.3226	60.0041	1.4622	0.0885751	0.0292029
MDBSrug1_03343.2	46.9696	51.9533	72.3305	72.317	1.46222	0.0691135	0.0183153
MDBSrug1_09711.1	9.45027	9.7473	13.2899	14.8672	1.4667	0.10128	0.0374964
MDBSrug1_06860.1	11.2823	12.2521	18.6093	15.9781	1.46965	0.116487	0.0469399
MDBSrug1_10487.1	2.76019	2.84639	4.07368	4.42773	1.51633	0.0640466	0.0155249
MDBSrug1_06923.1	0.286719	0.234843	0.391722	0.403608	1.5249	0.10514	0.0403188
MDBSrug1_00232.1	11.6584	13.3779	20.6735	17.5256	1.52575	0.0970362	0.0343371
MDBSrug1_02254.1	1.95782	1.80148	2.947	2.87918	1.5498	0.0235557	0.00253366
MDBSrug1_02205.1	29.7615	26.8759	47.8123	40.7987	1.56453	0.100158	0.0366908
MDBSrug1_05977.1	22.105	20.901	31.5268	35.9213	1.56834	0.0942806	0.0325536
MDBSrug1_09282.1	12.4534	13.0751	21.2475	19.1385	1.582	0.0700125	0.0189356
MDBSrug1_05291.1	4.15361	4.52521	6.99375	6.81451	1.59103	0.0193279	0.00162698
MDBSrug1_12318.1	33.5319	23.786	41.7058	49.6331	1.59355	0.118582	0.0482463
MDBSrug1_02433.1	0.881796	1.13136	1.71417	1.54202	1.61746	0.0665589	0.0168083
MDBSrug1_06013.1	27.1592	26.523	46.2625	42.7772	1.65864	0.0553113	0.0119417
MDBSrug1_03549.1	0.929999	0.950427	1.5029	1.62668	1.66429	0.0568537	0.0125406
MDBSrug1_02912.1	15.4072	12.6528	24.5815	22.4152	1.67486	0.0365883	0.00590318
MDBSrug1_07100.1	10.3948	11.667	16.8702	20.206	1.68055	0.105556	0.0406427
MDBSrug1_00620.1	4.28298	3.36249	6.66013	6.33043	1.69912	0.0797991	0.0244435
MDBSrug1_11213.1	1.21861	1.52334	2.31198	2.43385	1.73082	0.0638669	0.0153818
MDBSrug1_00273.1	4.85256	6.08082	10.6339	8.49341	1.74945	0.107782	0.04192
MDBSrug1_09694.1;MDBSrug1_07919.1	241.15	225.714	438.88	381.715	1.75767	0.0840964	0.0267431
MDBSrug1_06409.1	14.8791	13.9454	25.8361	25.8135	1.79186	0.025946	0.00297277
MDBSrug1_03914.1	0.765825	0.635003	1.2285	1.30679	1.80985	0.0297798	0.00403872
MDBSrug1_12165.1	3.09789	4.38816	6.05097	7.58403	1.82139	0.0951173	0.0332132
MDBSrug1_04318.1	1.44783	1.1712	2.39834	2.3944	1.82997	0.0805295	0.0251066
MDBSrug1_00627.1	31.5545	31.7746	59.8402	57.1701	1.84765	0.0305615	0.00431148
MDBSrug1_03758.1	3.73786	3.38082	6.1242	7.06994	1.85345	0.0683303	0.0177882
MDBSrug1_04839.1	0.472638	0.31387	0.835744	0.636205	1.8715	0.121096	0.0498351
MDBSrug1_05378.1	42.8298	52.0905	82.757	98.9499	1.91431	0.0655619	0.0164033
MDBSrug1_08100.1	8.3735	6.32214	14.7472	13.3979	1.9152	0.0432644	0.00792449
MDBSrug1_02517.1	0.440774	0.431844	0.806487	0.88883	1.94279	0.0607955	0.0143578
MDBSrug1_00693.1	2.49571	3.33961	5.85864	5.48591	1.94412	0.0599978	0.0140291
MDBSrug1_09908.1	97.2354	91.2977	193.435	173.696	1.9473	0.051834	0.0107062
MDBSrug1_07803.1	1.42929	1.25157	2.52709	2.70987	1.95347	0.00982732	0.000444259
MDBSrug1_04335.1	15.0617	13.0102	30.0854	24.8328	1.95634	0.0891472	0.0295305
MDBSrug1_07527.1	8.08216	5.7251	14.647	12.6706	1.97849	0.0507911	0.0104116
MDBSrug1_03748.1	18.3661	19.0939	40.5407	35.5625	2.03159	0.0761759	0.022265
MDBSrug1_08060.1	1.2637	0.975014	2.32703	2.2446	2.04208	0.0606912	0.0142858
MDBSrug1_06333.1	0.727759	0.866591	1.43481	1.8285	2.0468	0.117287	0.0474451
MDBSrug1_04711.1	8.23456	8.13944	16.9782	16.6219	2.05204	0.00817096	0.0003248
MDBSrug1_03887.1	47.3453	54.568	113.175	96.9998	2.06229	0.0575284	0.0128688
MDBSrug1_05761.1	6.47445	4.96522	12.6904	11.1847	2.08704	0.0281555	0.00359899
MDBSrug1_00260.1	0.144279	0.192174	0.385065	0.325786	2.11277	0.0425195	0.00772177
MDBSrug1_08885.1	0.704863	0.492931	1.11329	1.44946	2.13956	0.0952147	0.0333214
MDBSrug1_12723.1	52.1869	44.9368	107.863	101.305	2.15363	0.00779999	0.000279657
MDBSrug1_04533.1	2.21181	1.6296	4.10216	4.23393	2.17006	0.0698947	0.0187947
MDBSrug1_12171.1	0.386298	0.488668	1.07723	0.855504	2.20892	0.0886645	0.0293014
MDBSrug1_06249.1	2.97863	3.46927	6.61945	7.65092	2.21318	0.0459166	0.00866081
MDBSrug1_06576.1	19.9585	20.6898	49.3694	41.0257	2.22383	0.103605	0.0389224
MDBSrug1_04224.1	0.233969	0.14313	0.405259	0.434583	2.22711	0.0979692	0.0349726
MDBSrug1_09403.1	0.305508	0.289027	0.705071	0.624083	2.23562	0.0605827	0.0142131
MDBSrug1_10537.1	10.6663	6.24929	21.731	16.328	2.24993	0.0983816	0.0352732
MDBSrug1_03235.1	0.839619	0.705748	1.70703	1.7957	2.2666	0.0110119	0.00055789
MDBSrug1_01003.1	155.093	169.334	361.15	376.566	2.2739	0.00264453	3.09181e-05
MDBSrug1_00978.1	7.85745	4.44229	14.8267	13.2544	2.28307	0.0926687	0.0315637
MDBSrug1_11319.1	4.8203	4.23791	10.8462	10.1464	2.31752	0.006532	0.000193465
MDBSrug1_03100.1	0.516268	0.340245	0.97226	1.015	2.32018	0.0836002	0.0263898
MDBSrug1_09396.1	4.90111	3.78867	10.4142	9.77985	2.32389	0.0238178	0.00258042
MDBSrug1_04233.1	1.92383	1.59926	3.83696	4.37665	2.33136	0.029518	0.00398021
MDBSrug1_06303.1	4.43432	3.98822	9.95968	10.1614	2.38895	0.00865408	0.000357495
MDBSrug1_07745.1;MDBSrug1_12552.1	3.75452	3.10774	7.68428	8.78167	2.3995	0.0298304	0.00411533
MDBSrug1_02794.1	0.496881	0.658452	1.34179	1.44464	2.4118	0.0217075	0.00223335
MDBSrug1_08979.1	1.04207	0.664371	2.0975	2.01962	2.41269	0.0879349	0.0288547
MDBSrug1_07948.1	6.08492	6.20433	16.3125	13.3655	2.41495	0.106402	0.0411342
MDBSrug1_04568.1	5.63479	5.48213	12.5702	14.5027	2.43529	0.0751455	0.0216124
MDBSrug1_02109.1	0.294645	0.202749	0.598624	0.613663	2.43728	0.0747249	0.0212002
MDBSrug1_00467.1	4.87807	4.12009	10.7216	11.2654	2.44349	0.0074556	0.000249876
MDBSrug1_11430.1	1.41185	0.840979	3.09875	2.44492	2.46076	0.0648578	0.0160249
MDBSrug1_02789.1	0.141192	0.13646	0.337563	0.346195	2.46264	0.00240812	2.06464e-05
MDBSrug1_02047.1	1.58163	0.878828	3.14391	2.93375	2.47014	0.0997549	0.0363876
MDBSrug1_08205.1	27.7564	24.2504	65.022	68.1978	2.56158	0.00352164	4.94073e-05
MDBSrug1_04734.1	7.5583	6.00512	19.5784	15.4823	2.58494	0.0876296	0.0286862
MDBSrug1_12296.1	2.42624	3.25282	7.59922	7.17048	2.60073	0.024439	0.00272391
MDBSrug1_04862.1	2.77298	3.02521	7.11469	8.25583	2.65091	0.0643334	0.0156947
MDBSrug1_01609.1	0.423619	0.84132	1.39701	2.02274	2.70349	0.12059	0.049533
MDBSrug1_02355.1;MDBSrug1_05520.1;MDBSrug1_05055.1	0.162196	0.392385	0.640936	0.865396	2.71616	0.0977545	0.0348198
MDBSrug1_08814.1	10.2205	15.062	34.2601	34.6134	2.72416	0.0691119	0.0182611
MDBSrug1_03116.1;MDBSrug1_03869.1	18.9863	19.2795	57.8282	47.6424	2.75626	0.0955273	0.0335798
MDBSrug1_12482.1	0.146048	0.173819	0.424233	0.457774	2.75742	0.00676932	0.000211047
MDBSrug1_01049.1	6.66867	4.54382	16.0247	15.0107	2.76793	0.0342001	0.00519799
MDBSrug1_11590.1	0.988445	0.6214	2.41469	2.06357	2.7818	0.0300888	0.00417443
MDBSrug1_11449.1	0.163217	0.264223	0.508636	0.682222	2.78602	0.0873531	0.0283914
MDBSrug1_02111.1	0.197841	0.134365	0.49902	0.426596	2.78626	0.0263997	0.00310706
MDBSrug1_12141.1	1.88194	2.72903	7.40578	5.49929	2.79878	0.102258	0.0380182
MDBSrug1_04995.1	0.320022	0.383762	1.11333	0.860572	2.80469	0.108182	0.0422439
MDBSrug1_07044.1	11.0335	7.94707	26.173	27.0789	2.8056	0.0414257	0.00732941
MDBSrug1_12699.1	18.1406	24.8287	66.3424	57.1539	2.87406	0.024475	0.002747
MDBSrug1_08680.1	3.29393	4.84724	12.8202	11.3497	2.96885	0.0174904	0.00132235
MDBSrug1_01227.1	3.87928	4.02635	11.6019	11.8816	2.97048	0.00207939	1.45865e-05
MDBSrug1_09432.1	5.2435	4.71207	15.0368	14.6219	2.97911	0.00158554	6.17902e-06
MDBSrug1_12076.1	0.351673	0.670233	1.52295	1.61443	3.07013	0.0757874	0.0220333
MDBSrug1_07864.1;MDBSrug1_00283.1	1.02984	1.14542	2.97796	3.74036	3.08851	0.0995155	0.0362227
MDBSrug1_11386.1	1.0285	1.49169	3.6207	4.27934	3.13471	0.0283832	0.00369446
MDBSrug1_04969.1	6.62614	5.0366	16.2603	20.7679	3.17491	0.0835789	0.0263179
MDBSrug1_01182.1	1.82569	3.1111	6.65976	9.19238	3.21102	0.0965658	0.0340953
MDBSrug1_00219.1	6.59283	6.23506	22.2902	19.4989	3.25767	0.0574917	0.0128158
MDBSrug1_11018.1	20.2821	15.634	61.083	56.0146	3.2603	0.00729453	0.000238792
MDBSrug1_07707.1	0.479939	0.8321	2.16881	2.11806	3.26733	0.0699562	0.0188658
MDBSrug1_11827.1	0.111686	0.185344	0.548101	0.427651	3.28503	0.0580502	0.0131665
MDBSrug1_00241.1	9.99929	6.97553	24.0278	31.7462	3.28569	0.0908635	0.0305947
MDBSrug1_11453.1	0.596442	1.21138	3.16403	2.8534	3.32855	0.0503142	0.0102354
MDBSrug1_01744.1	1.01074	0.821059	3.35777	2.80827	3.36611	0.0561733	0.0122592
MDBSrug1_08159.1	3.68966	2.8572	11.2657	10.8879	3.38385	0.0137135	0.000823023
MDBSrug1_04102.1	0.287457	0.204935	0.802789	0.86491	3.38694	0.00988042	0.000454361
MDBSrug1_06630.1	5.91373	4.14126	18.9773	15.2386	3.40288	0.0575559	0.0129198
MDBSrug1_10737.1	15.8496	17.4929	51.6071	62.8096	3.43156	0.0818414	0.0255794
MDBSrug1_01677.1	43.3366	41.4308	164.33	126.925	3.43593	0.113325	0.0448708
MDBSrug1_03213.1	9.28156	10.9966	34.3736	35.6992	3.45558	0.00254831	2.58207e-05
MDBSrug1_05922.1	5.06415	4.95669	17.1968	17.5329	3.46575	0.00405446	7.26832e-05
MDBSrug1_05122.1	0.498618	0.647695	1.7158	2.29398	3.49798	0.109246	0.0427446
MDBSrug1_04934.1	0.57553	0.464024	1.80922	1.85246	3.52236	0.0127155	0.000713577
MDBSrug1_00366.1	0.861062	1.06255	3.54588	3.35646	3.58822	0.00312379	3.89561e-05
MDBSrug1_10724.1	78.1775	77.9226	298.983	264.452	3.60944	0.053828	0.0114956
MDBSrug1_03638.1	0.781243	1.08845	3.3051	3.60442	3.69554	0.00718267	0.000229532
MDBSrug1_10534.2	1.28582	0.850199	4.26083	3.69224	3.72332	0.0179006	0.00142312
MDBSrug1_12417.1	0.0474374	0.0168139	0.140445	0.0994486	3.73367	0.0839854	0.0266423
MDBSrug1_04865.1	8.93244	6.5202	32.9571	25.1603	3.761	0.0917527	0.0310371
MDBSrug1_02944.1	0.297788	0.231292	1.05629	0.950699	3.79336	0.0127556	0.000725767
MDBSrug1_03106.1	1.20993	0.544644	3.40615	3.29199	3.81753	0.0777464	0.0231482
MDBSrug1_07614.1;MDBSrug1_07872.1	29.6824	35.6648	138.969	114.92	3.88523	0.066566	0.016862
MDBSrug1_10912.1	0.642553	0.590097	2.11817	2.70136	3.90989	0.10033	0.0368321
MDBSrug1_12722.1	0.432339	0.238321	1.10848	1.57539	4.00184	0.106934	0.0415068
MDBSrug1_02273.1	0.547175	0.726124	2.44339	2.68336	4.02635	0.00800311	0.000305653
MDBSrug1_04768.1;MDBSrug1_10693.1	170.284	153.961	685.394	643.016	4.09693	0.0127061	0.000703146
MDBSrug1_05731.1	0.366237	0.403489	1.4009	1.75479	4.09976	0.0907328	0.0304093
MDBSrug1_09531.1	1.06819	0.777177	3.5842	4.03288	4.12767	0.014108	0.000879691
MDBSrug1_04748.2	0.848905	0.622368	3.35629	2.72816	4.1355	0.05959	0.0138409
MDBSrug1_06784.1	0.322297	0.469886	1.69231	1.63912	4.20538	0.0206666	0.00198129
MDBSrug1_01502.1	0.521372	0.346374	1.89962	1.80474	4.26894	0.0127635	0.000736164
MDBSrug1_07593.1	0.536152	0.39333	1.71772	2.25457	4.27366	0.0932326	0.0319011
MDBSrug1_10188.1	254.643	207.547	881.903	1095.07	4.27741	0.0770112	0.0226892
MDBSrug1_04944.1	2.2419	3.07137	12.5125	10.8169	4.39078	0.0276226	0.00346628
MDBSrug1_03043.1	1.07393	0.598406	3.29363	4.19055	4.47528	0.0522907	0.0109228
MDBSrug1_00480.1	0.151673	0.256608	0.928209	0.918711	4.52365	0.0447331	0.0084027
MDBSrug1_03134.1	2.9574	2.53062	11.0489	14.1747	4.59614	0.094906	0.0329915
MDBSrug1_06372.1	0.136808	0.121736	0.561046	0.627975	4.59891	0.0368086	0.00599611
MDBSrug1_08426.1	1.26458	2.81753	9.17188	9.84958	4.65971	0.0359763	0.00574836
MDBSrug1_02913.1	7.51932	7.79681	37.3192	34.8019	4.70884	0.0264268	0.00313084
MDBSrug1_00509.1	1.01191	1.07205	5.05492	5.20211	4.92189	0.00378564	5.90123e-05
MDBSrug1_12316.1	4.85539	1.36238	17.9854	12.8121	4.95313	0.0724661	0.020051
MDBSrug1_05372.1	27.9865	25.3648	136.506	128.056	4.95886	0.0152673	0.000987674
MDBSrug1_10220.1	1.40802	0.873876	5.24873	6.3357	5.07666	0.0374857	0.00616483
MDBSrug1_08685.1	0.236847	0.314508	1.2288	1.58459	5.10269	0.0871022	0.0281741
MDBSrug1_06770.1	1.80673	2.24724	9.26804	11.6428	5.15812	0.0803739	0.0249328
MDBSrug1_01359.1	0.326186	0.0635743	1.06499	1.01954	5.34823	0.0899374	0.0300025
MDBSrug1_09657.1	0.696463	0.357063	2.87299	2.79108	5.3763	0.0366117	0.0059355
MDBSrug1_12582.2	2.53342	2.65327	14.472	13.7482	5.44089	0.0169766	0.00124381
MDBSrug1_05543.1	0.878855	0.864257	4.87184	4.73464	5.51111	0.0102387	0.000478817
MDBSrug1_02824.1	9.97838	10.6084	54.9876	58.4877	5.51204	0.019998	0.00182367
MDBSrug1_08277.1	46.4947	39.4178	227.292	246.592	5.5159	0.016671	0.00120842
MDBSrug1_01539.1	0.237219	0.355691	1.75733	1.52743	5.54006	0.0224604	0.00236333
MDBSrug1_00880.1	0.583576	0.64576	2.98221	3.83158	5.54266	0.0946039	0.032739
MDBSrug1_07021.1	0.111781	0.120273	0.736435	0.560146	5.5874	0.103813	0.0393243
MDBSrug1_00045.1	1.2189	1.01292	6.53882	6.19299	5.70468	0.00394234	6.76005e-05
MDBSrug1_08662.1	1.29521	2.05208	9.46074	10.5048	5.96468	0.00840417	0.000340621
MDBSrug1_07263.1	1.07868	2.84878	10.8137	12.8506	6.02534	0.0191634	0.00159819
MDBSrug1_09619.1	0.152151	0.0344678	0.620557	0.510562	6.0611	0.0281721	0.00362306
MDBSrug1_05589.1	1.30768	2.37297	12.7814	9.80134	6.13552	0.07173	0.0196796
MDBSrug1_00843.1	0.13483	0.0643028	0.585494	0.686317	6.38674	0.0179429	0.00144046
MDBSrug1_10916.1	5.36932	7.26238	46.3772	36.8169	6.58614	0.0760384	0.0221655
MDBSrug1_08605.1	7.20387	9.41093	59.4334	54.7132	6.87017	0.0114125	0.000595977
MDBSrug1_00276.1	0.10795	0.428566	2.15937	1.54117	6.89737	0.0748555	0.0214123
MDBSrug1_00920.1	0.759765	1.09983	5.79169	7.32901	7.05568	0.0744957	0.0210771
MDBSrug1_12004.1	1.61069	1.06665	8.62522	10.3495	7.08715	0.047863	0.00928908
MDBSrug1_00798.1	0.184869	0.0508628	0.744387	0.927752	7.09339	0.0297969	0.00406427
MDBSrug1_05719.1	1.38066	1.28253	9.31131	9.93919	7.22836	0.0210013	0.00204612
MDBSrug1_06102.1	1.06511	1.09317	8.8316	7.24022	7.44659	0.0724211	0.0199821
MDBSrug1_06211.1	5.31757	8.11611	49.0735	51.0521	7.45333	0.00263058	2.87047e-05
MDBSrug1_06406.1	0.5196	0.422817	3.44827	4.08879	7.99758	0.056588	0.0124379
MDBSrug1_05661.1	0.0467286	0.0417661	0.333147	0.403787	8.32744	0.0678771	0.0175644
MDBSrug1_01817.1	1.21043	0.99687	9.865	8.52585	8.33184	0.0474096	0.00916414
MDBSrug1_06687.1	0.273226	0.602049	4.43503	3.27809	8.81222	0.0868901	0.0280378
MDBSrug1_08816.1	0.208669	0.115367	1.45471	1.40377	8.82148	0.00569094	0.000150812
MDBSrug1_06649.1	0.0448111	0.145265	1	0.680803	8.84281	0.109411	0.0428944
MDBSrug1_02686.1	9.84618	15.9909	126.804	106.033	9.01174	0.046757	0.00892865
MDBSrug1_02284.1	34.0703	34.7382	338.78	334.324	9.78228	0.00384549	6.29425e-05
MDBSrug1_08121.1	0.388176	0.203847	3.46285	2.42473	9.94484	0.114347	0.0454534
MDBSrug1_09352.1	0.229025	0.382316	3.02412	3.19615	10.1748	0.00179874	9.81384e-06
MDBSrug1_08494.1	0.803785	0.250581	6.1438	4.90533	10.4794	0.0446398	0.00835039
MDBSrug1_09175.1	3.53346	3.05145	35.5332	34.0665	10.5696	0.00746679	0.000256071
MDBSrug1_00608.1	0.401255	0.379567	4.72057	3.54863	10.5904	0.0987329	0.0354761
MDBSrug1_05301.1	0.0141412	0.181645	1.12424	0.955727	10.6237	0.0155338	0.00105335
MDBSrug1_12535.1	0.764868	3.33699	23.3413	22.6459	11.2113	0.0280409	0.00354063
MDBSrug1_12144.1	0.42206	0.267262	4.21385	3.60349	11.3406	0.0423284	0.00765407
MDBSrug1_05365.1	0.0227756	0.162846	1.02382	1.29524	12.4935	0.0403525	0.00698228
MDBSrug1_09876.1	0.142883	0.0525919	1.01938	1.49317	12.8536	0.118171	0.0479867
MDBSrug1_07396.1	2.85114	2.49215	38.0294	31.3286	12.9804	0.0657064	0.0165418
MDBSrug1_00038.1	0.0608031	0.202294	1.39435	2.06909	13.1641	0.12001	0.0492011
MDBSrug1_09776.1	0.110364	0.124599	1.62929	1.56323	13.5873	0.0104604	0.000513645
MDBSrug1_01599.1;MDBSrug1_04947.1;MDBSrug1_10025.1	0.219508	0.0919977	1.82579	2.51826	13.9454	0.0990667	0.0357505
MDBSrug1_01749.1	0.164744	0.131685	2.30895	2.45826	16.0821	0.0159944	0.00110951
MDBSrug1_12508.1	0.405898	0.475054	6.34945	8.07703	16.376	0.0803375	0.0248589
MDBSrug1_04917.1	3.40069	8.42402	114.576	81.4312	16.5761	0.106896	0.0414085
MDBSrug1_11177.1	0.366343	0.290626	7.48641	5.46321	19.7111	0.103446	0.0387016
MDBSrug1_10258.2	0.530304	0.305356	9.35681	7.6116	20.3054	0.0646756	0.0158791
MDBSrug1_01155.1	6.85404	7.42288	142.065	151.117	20.5353	0.0201748	0.00190269
MDBSrug1_01042.1	0.112416	0.168019	3.14184	3.66073	24.2572	0.0481827	0.00942624
MDBSrug1_07193.1;MDBSrug1_04219.1	0.292798	0.662151	10.9191	13.2986	25.3602	0.0594429	0.013714
MDBSrug1_10639.1	0.447898	0.294536	8.70437	10.7091	26.1484	0.0666802	0.0169429
MDBSrug1_07551.1	0.0678989	0.0231924	1.37878	1.10322	27.2474	0.066791	0.0170231
MDBSrug1_08554.1	0.380201	0.673136	13.6901	15.2094	27.4362	0.0289719	0.00383883
MDBSrug1_10991.1	0.0847771	0.0720603	2.60336	2.11717	30.0982	0.0674001	0.0173885
MDBSrug1_03363.1	0.135273	0.106705	3.71306	4.11149	32.3358	0.0325729	0.00477296
MDBSrug1_07756.1	0.131105	0.093597	3.7985	4.30002	36.0411	0.0394625	0.00670524
MDBSrug1_04152.1	0.0777912	0.191429	5.23912	4.72045	36.9942	0.026953	0.00329823
MDBSrug1_09087.1	1.61438	1.81964	77.7009	74.5023	44.3223	0.0133084	0.000788338
MDBSrug1_06622.1	0.602254	0.873876	39.6013	29.0116	46.4816	0.0994094	0.0361066
MDBSrug1_00476.1	0.081215	0.0796699	5.6038	5.97851	71.9913	0.0208764	0.00201767
MDBSrug1_07226.1	0.446197	0.224912	52.8572	55.8849	162.033	0.0172447	0.00127689
MDBSrug1_00253.1	1.32714	0.795674	2.07131	2.89783	2.34082	0.12146	0.0500797
MDBSrug1_08905.1	0.97923	0.792089	0.550912	0.274446	0.465956	0.121513	0.0501964
MDBSrug1_07772.1	27.032	27.1611	12.9016	6.09163	0.350473	0.121553	0.0503077
MDBSrug1_08719.1	1.24314	1.2901	3.5501	2.79874	2.50622	0.122611	0.0508412
MDBSrug1_08982.2	1.967	2.74172	0.376373	0.378253	0.160261	0.123169	0.0511686
MDBSrug1_12491.1	1.2116	0.933011	0.359363	0.37372	0.341826	0.123257	0.0513012
MDBSrug1_08113.1	4.03062	4.25942	13.2145	17.6769	3.72632	0.12331	0.0514194
MDBSrug1_10180.1;MDBSrug1_07238.1	5.96441	5.27786	6.97858	8.09528	1.34082	0.123468	0.0515813
MDBSrug1_12128.1	1.27724	0.355231	2.26286	2.7072	3.0445	0.125271	0.0524323
MDBSrug1_04609.1	56.4436	56.9152	34.9118	42.2177	0.680402	0.125432	0.0525972
MDBSrug1_09579.1	26.59	27.3688	41.8464	36.671	1.45514	0.125629	0.052778
MDBSrug1_08919.1	0.171209	0.216978	0.00680623	0.0904237	0.250472	0.125658	0.052888
MDBSrug1_12294.1	2.14681	2.07348	0.69379	1.19278	0.447025	0.127785	0.0538828
MDBSrug1_05082.1	6.06295	8.15822	2.90654	2.36509	0.370689	0.128304	0.0542017
MDBSrug1_02541.2	24.4758	16.7536	2.43474	1.80693	0.10288	0.129046	0.0546158
MDBSrug1_05264.1	4.79868	3.60102	5.82239	7.20616	1.55107	0.129707	0.0549965
MDBSrug1_02861.1	14.5949	15.2316	31.2302	39.9059	2.38499	0.130164	0.0552917
MDBSrug1_03176.1	0.865032	0.401093	1.69815	1.60122	2.60588	0.130471	0.0555239
MDBSrug1_10686.1	0.0825973	0.121252	0.0213027	0.0133683	0.170081	0.131052	0.0558732
MDBSrug1_02851.1	11.0729	6.75071	35.5335	24.2834	3.35606	0.13207	0.0564101
MDBSrug1_04333.1	1.28528	1.48742	6.4826	4.66694	4.02118	0.132183	0.0565615
MDBSrug1_07608.1	0.70022	0.669152	1.08392	0.933833	1.47349	0.132657	0.0568679
MDBSrug1_05088.2	0.998618	0.708879	2.60794	1.86033	2.61686	0.133352	0.0572698
MDBSrug1_07188.1	0.89367	1.10746	1.91319	1.49653	1.7039	0.133841	0.0575842
MDBSrug1_10740.1	0.318438	0.358833	0.00666642	0.14073	0.217633	0.134098	0.0577991
MDBSrug1_05636.1	1.92933	2.77496	0.435773	0.590229	0.2181	0.134222	0.0579571
MDBSrug1_03020.1	2.15319	1.79567	1.5407	1.26179	0.709696	0.134543	0.0582006
MDBSrug1_06891.1	2.26809	3.33904	0.528276	0.840138	0.244049	0.135195	0.0585879
MDBSrug1_08083.1	0.683526	0.580535	0.992529	1.26382	1.785	0.135915	0.0590061
MDBSrug1_08834.1	1.95038	1.2004	3.14828	2.92204	1.92661	0.136349	0.0593005
MDBSrug1_06743.1	0.393634	0.434434	0.954914	1.27184	2.6891	0.136917	0.0596545
MDBSrug1_11091.1	0.793152	1.11622	0.332304	0.48879	0.430033	0.137384	0.0599648
MDBSrug1_01886.1	0.674204	0.175891	1.55983	1.55301	3.66175	0.13794	0.0603151
MDBSrug1_10194.1	3.01131	2.66488	3.42538	3.54069	1.22724	0.139191	0.0609707
MDBSrug1_08565.1	1.58141	1.70706	1.19913	0.857044	0.625269	0.140021	0.0614433
MDBSrug1_10138.3	0.117516	0.0998577	0.341991	0.482587	3.79336	0.140133	0.0616019
MDBSrug1_04658.2	1.9373	1.52294	0.951067	0.232897	0.342163	0.140691	0.0619566
MDBSrug1_04864.1	0.547211	0.588731	1.11643	0.902088	1.77696	0.140862	0.0621417
MDBSrug1_09778.1	1.02318	1.06323	0.971705	0.960511	0.926095	0.140895	0.0622664
MDBSrug1_02637.1	6.13738	6.23791	104.56	68.3357	13.9711	0.141297	0.0625538
MDBSrug1_00872.1	1.09027	1.55435	2.24914	1.85615	1.55231	0.141661	0.0628253
MDBSrug1_08262.1	0.198728	0.143347	0.0855568	0.0636611	0.436215	0.142072	0.0631185
MDBSrug1_11336.1	2.01109	2.1922	6.09054	4.57693	2.53788	0.142126	0.0632534
MDBSrug1_00165.1	1.1708	0.918725	1.58054	1.60162	1.52291	0.142217	0.0634045
MDBSrug1_03677.1	0.168657	0.0207143	0.411029	0.382684	4.1913	0.142237	0.0635244
MDBSrug1_12101.1	1.07089	0.396579	1.99016	1.64018	2.47388	0.143	0.0639768
MDBSrug1_00553.1	2.70125	2.18845	3.49957	4.46787	1.62944	0.143797	0.0644455
MDBSrug1_06964.1	5.56497	8.1975	1.95506	3.76274	0.415464	0.143806	0.0645612
MDBSrug1_06650.1	9.32055	12.111	7.21382	5.5601	0.596034	0.143956	0.0647411
MDBSrug1_10291.1	0.909088	0.599886	0.126368	0.205287	0.219788	0.145631	0.0656079
MDBSrug1_06376.1	25.2757	22.786	34.9503	29.7811	1.34684	0.14567	0.0657388
MDBSrug1_02396.1	7.73339	6.30507	8.62965	9.72917	1.30775	0.14689	0.0664041
MDBSrug1_05131.1	0.192755	0.632442	1.6271	2.67391	5.21211	0.147346	0.0667251
MDBSrug1_08118.1	15.5671	12.189	5.23912	9.55037	0.532838	0.148657	0.0674347
MDBSrug1_08551.1	0.759729	1.13261	1.40482	1.85648	1.72342	0.148921	0.0676704
MDBSrug1_07264.1	15.1017	15.4155	9.22255	11.6177	0.682901	0.149311	0.0679637
MDBSrug1_07155.1	7.49415	8.55094	2.75707	5.2313	0.49787	0.150038	0.0684117
MDBSrug1_06426.1	0.11938	0.134678	0.0804601	0.0407987	0.477286	0.150148	0.0685791
MDBSrug1_01906.1	0.237396	0.438355	4.07959	2.5809	9.85643	0.150814	0.0690005
MDBSrug1_10145.1	4.22875	4.72237	6.46891	8.04825	1.62183	0.150848	0.0691339
MDBSrug1_11746.1	4.53144	2.65071	7.34919	7.49807	2.06724	0.151255	0.0694381
MDBSrug1_03218.1	1.40742	1.46722	0.595554	0.939793	0.534101	0.151311	0.0695817
MDBSrug1_10484.1	3.14925	2.16488	0.626808	0.666288	0.243331	0.152344	0.0701755
MDBSrug1_10876.1	0.0540264	0.0464428	0.389762	0.255788	6.42535	0.152444	0.0703405
MDBSrug1_09646.1	6.76154	6.31133	5.58864	6.04176	0.88966	0.152482	0.0704767
MDBSrug1_08581.1;MDBSrug1_09729.1	1.86046	2.10768	1.46795	0.967363	0.613716	0.154436	0.0715005
MDBSrug1_11148.1	15.7266	17.4855	43.0928	32.1508	2.26555	0.154481	0.0716417
MDBSrug1_01842.1	4.34678	5.14104	44.0729	28.3916	7.63765	0.154566	0.0718017
MDBSrug1_06989.1	2.47455	1.53682	0.120705	0.190971	0.077698	0.156303	0.0727301
MDBSrug1_05079.1	7.87021	5.82015	10.2249	10.7492	1.53204	0.15672	0.0730465
MDBSrug1_04931.1	3.43985	3.08742	2.57233	1.87501	0.681346	0.158632	0.0740614
MDBSrug1_00448.1	0.926419	1.63603	2.6838	2.61496	2.06785	0.158659	0.0741975
MDBSrug1_04764.1	95.1336	123.705	55.4869	62.5867	0.539546	0.158843	0.0744074
MDBSrug1_04885.1	0.523428	0.407877	0.229829	0.344119	0.616284	0.15896	0.0745861
MDBSrug1_05425.1	2.62965	2.8667	2.32086	2.40628	0.86005	0.159079	0.0747661
MDBSrug1_09138.1	0.747537	0.43568	0.263679	0.0269722	0.245645	0.159302	0.0749948
MDBSrug1_03837.1	2.31421	2.02271	0.585568	1.34279	0.444639	0.15962	0.0752689
MDBSrug1_08040.1	0.923194	0.559021	1.431	1.34819	1.87502	0.159702	0.0754322
MDBSrug1_03853.1;MDBSrug1_07183.1;MDBSrug1_05280.1	0.650776	0.958793	6.92163	4.35029	7.00306	0.161232	0.0762805
MDBSrug1_03657.1	2.64067	1.87149	1.12283	0.87091	0.44186	0.161732	0.076643
MDBSrug1_02939.1	2.98561	3.56295	7.65285	11.0399	2.85449	0.164604	0.0781324
MDBSrug1_06707.1	0.41327	0.764257	1.33891	0.955646	1.94862	0.165586	0.0787277
MDBSrug1_05001.1	0.937123	1.01207	2.67944	1.9481	2.37409	0.166489	0.0792868
MDBSrug1_06219.1	1.04136	0.834889	1.68913	1.29799	1.59207	0.167028	0.0796733
MDBSrug1_02304.1	33.6057	38.0307	27.8226	27.511	0.772424	0.167204	0.0798876
MDBSrug1_06679.1	21.9979	21.2988	32.7766	27.9132	1.40172	0.167391	0.0801078
MDBSrug1_05614.1	2.04895	2.05202	0.47054	1.1421	0.393235	0.16781	0.080439
MDBSrug1_11951.1	5.27362	6.40865	4.54118	3.06998	0.651514	0.16795	0.0806371
MDBSrug1_01400.1	3.13841	3.3395	8.82975	6.4253	2.35494	0.168073	0.0808269
MDBSrug1_12646.1	0.642553	0.477393	0.8407	0.733347	1.40547	0.16808	0.0809613
MDBSrug1_12652.1	2.743	2.62305	4.29116	5.51672	1.82777	0.16846	0.0812756
MDBSrug1_07336.1	1.33483	1.05623	0.900174	0.726211	0.680192	0.169155	0.081743
MDBSrug1_00497.1	0.628695	0.851793	0.105437	0.446422	0.372755	0.170263	0.082411
MDBSrug1_11714.1	0.104374	0.115487	0.285908	0.421772	3.21877	0.170867	0.0828365
MDBSrug1_11879.1	0.11187	0.0477063	0.596553	1.01374	10.0911	0.171237	0.0831492
MDBSrug1_02240.1	1.6528	1.62538	0.719311	1.11968	0.56098	0.171289	0.0833083
MDBSrug1_04198.2	4.10541	4.31355	12.1944	18.3183	3.62428	0.171776	0.0836788
MDBSrug1_10911.1	2.97487	3.60859	2.29341	2.16874	0.677782	0.173669	0.0847362
MDBSrug1_04261.1	7.18048	7.39158	2.54385	4.66167	0.494475	0.175184	0.0856123
MDBSrug1_07903.1	0.0764053	0.252635	0.719274	1.26041	6.01653	0.175214	0.0857632
MDBSrug1_08907.1	0.821826	1.01736	0.385287	0.676951	0.577559	0.175437	0.0860094
MDBSrug1_10091.1	5.85773	4.22612	7.94282	7.75106	1.55634	0.176001	0.0864229
MDBSrug1_06601.1	4.37159	3.95327	3.41018	2.55633	0.71671	0.176465	0.0867882
MDBSrug1_05905.1	0.165361	0.163574	0.58198	0.914616	4.54982	0.176667	0.0870254
MDBSrug1_02198.1	2.7687	1.9243	0.791508	1.5597	0.501003	0.177814	0.0877289
MDBSrug1_05866.1	2.32168	2.33449	4.22902	3.38094	1.63438	0.177924	0.0879218
MDBSrug1_00412.1	23.4011	17.0791	9.14709	9.4101	0.458426	0.178199	0.0881965
MDBSrug1_06153.1	0.281477	0.107046	0.485002	0.499899	2.53498	0.178913	0.0886897
MDBSrug1_08678.1	7.42007	10.8697	3.10855	3.29832	0.350299	0.178931	0.0888378
MDBSrug1_09803.1	0.00947863	0.0150324	0.0395088	0.025406	2.64839	0.179161	0.089092
MDBSrug1_09179.1	25.9226	25.6374	19.7407	14.7748	0.669424	0.179465	0.0893829
MDBSrug1_02616.1	10.4009	8.25669	7.20605	5.82607	0.69849	0.179504	0.0895422
MDBSrug1_07158.1	0.125618	0.374713	1.03218	0.602919	3.26803	0.179873	0.0898664
MDBSrug1_09097.1	0.0467144	0.0593113	0.114417	0.171324	2.69502	0.181482	0.0908119
MDBSrug1_12159.1	5.33317	3.82612	1.97881	2.08559	0.443745	0.181544	0.0909842
MDBSrug1_03646.1	3.97498	3.62265	3.03262	3.45068	0.853332	0.182049	0.0913792
MDBSrug1_09735.1	2.0229	2.3963	1.79036	1.61707	0.771052	0.18325	0.0921248
MDBSrug1_11530.1	0.729921	0.49794	0.40071	0.159461	0.456217	0.184387	0.0928401
MDBSrug1_02245.1	3.29776	4.97445	2.26874	1.4943	0.454902	0.185153	0.0933704
MDBSrug1_02399.1	2.07188	3.65174	1.41839	0.233501	0.28861	0.185244	0.0935607
MDBSrug1_09555.1	0.304108	0.0957314	0.388764	0.600527	2.47422	0.185723	0.0939472
MDBSrug1_03212.1	2.83859	2.89476	7.1883	5.18386	2.15793	0.186429	0.0944495
MDBSrug1_05797.1	1.73949	1.9288	4.50679	3.2313	2.10945	0.186826	0.0947964
MDBSrug1_04787.1	1.54221	0.834604	0.0479713	0.0228165	0.0297826	0.189151	0.0961234
MDBSrug1_05347.1	2.00471	2.03802	1.50801	1.04877	0.632439	0.189209	0.0963003
MDBSrug1_05584.1	9.31736	16.5356	24.5556	22.8242	1.83267	0.190245	0.0969759
MDBSrug1_11719.1	0.287811	0.171042	0.0426268	0.0395151	0.179016	0.191135	0.0975789
MDBSrug1_09599.1	2.87148	1.07388	10.8917	6.10906	4.30906	0.191599	0.097965
MDBSrug1_11582.1	44.6693	53.4502	33.2345	41.4677	0.761338	0.19166	0.0981453
MDBSrug1_00815.2	5.97257	5.00848	3.95421	3.93262	0.718222	0.192132	0.0985368
MDBSrug1_04379.1	0.588254	0.410381	2.4931	4.35962	6.86209	0.193742	0.0995138
MDBSrug1_04500.1	0.779507	1.32692	6.39605	11.4308	8.46306	0.193758	0.0996729
MDBSrug1_08950.1	0.989686	1.07695	0.555831	0.0808838	0.308092	0.194473	0.100192
MDBSrug1_02572.1	3.63685	2.77365	1.84432	2.04983	0.607465	0.194936	0.100583
MDBSrug1_12490.1	0.081378	0.121804	0.157577	0.165721	1.59117	0.195225	0.100884
MDBSrug1_06132.1	0.559722	0.358799	0.151995	0.223572	0.408883	0.196192	0.101537
MDBSrug1_11838.1	2.29868	3.04582	1.49891	1.50257	0.561602	0.196507	0.101853
MDBSrug1_02224.1	0.321932	0.255629	0.0486481	0.184561	0.403783	0.196533	0.102019
MDBSrug1_00554.1	4.30425	4.22829	7.29963	5.82485	1.53817	0.197023	0.102427
MDBSrug1_01725.1;MDBSrug1_06933.1	13.2229	13.9237	18.3271	23.0436	1.52397	0.197349	0.102751
MDBSrug1_08983.1	3.06032	1.86779	0.619299	0.61942	0.251358	0.199029	0.103781
MDBSrug1_02671.1	4.91068	4.3214	2.17842	3.54673	0.620136	0.199421	0.104141
MDBSrug1_03676.2	2.98334	2.0066	1.09402	0.964565	0.412547	0.199562	0.104369
MDBSrug1_03315.1	5.04643	3.0609	1.02545	0.974904	0.246734	0.199919	0.104712
MDBSrug1_08735.1	16.1735	8.50484	19.8421	23.7989	1.76839	0.200172	0.105001
MDBSrug1_07320.1	59.552	55.3364	111.359	84.0868	1.70118	0.20085	0.105513
MDBSrug1_08193.1	0.0939888	0.104764	0.0630247	0.0840259	0.739868	0.201482	0.106002
MDBSrug1_07770.1	0.0928156	0.120376	0.185228	0.276923	2.16777	0.20207	0.106469
MDBSrug1_03948.1	0.169129	0.235509	0.147235	0.0775836	0.555605	0.202869	0.107048
MDBSrug1_04729.1	12.0376	10.7945	10.408	9.37361	0.86639	0.204054	0.107832
MDBSrug1_01202.1	3.42826	2.12214	6.3365	4.23353	1.90437	0.204226	0.108082
MDBSrug1_08191.1	6.97703	8.04838	3.1313	5.63187	0.583223	0.205096	0.108702
MDBSrug1_11860.1	3.03612	2.86397	1.8728	0.733387	0.441721	0.205382	0.109014
MDBSrug1_06669.1	39.849	32.111	24.6381	27.0468	0.718245	0.208477	0.110819
MDBSrug1_11333.1	12.6646	13.3159	11.0367	8.69491	0.759478	0.208526	0.111008
MDBSrug1_09276.1	0.256756	0.252396	1.71687	0.972268	5.2816	0.209525	0.111703
MDBSrug1_05214.1	56.791	64.6272	72.3786	71.5832	1.18567	0.209908	0.112071
MDBSrug1_06523.1	4.92132	6.07114	6.93087	7.19319	1.28489	0.209957	0.112261
MDBSrug1_11644.1	3.42146	5.00615	2.89174	1.01889	0.464027	0.210398	0.112661
MDBSrug1_08483.1	2.9815	1.60495	0.488109	0.254219	0.161852	0.210688	0.11298
MDBSrug1_05935.1	6.6545	5.97439	6.89611	7.31685	1.12543	0.21089	0.113252
MDBSrug1_05579.1	10.1634	20.1736	26.8258	29.7219	1.86399	0.211294	0.113634
MDBSrug1_10982.1	0.525909	0.655891	2.5076	1.50618	3.39633	0.21145	0.113883
MDBSrug1_06996.1	7.58666	7.98008	6.84802	5.6416	0.802327	0.212692	0.114718
MDBSrug1_10294.1	2.66375	2.60706	2.44306	2.20916	0.88264	0.214619	0.115925
MDBSrug1_00704.1	6.32381	6.74957	3.00011	4.92844	0.606465	0.215118	0.116362
MDBSrug1_05034.1	0.124949	0.122664	0.274198	0.195889	1.89848	0.215206	0.116577
MDBSrug1_00545.1	1.97218	1.25788	0.979953	0.59554	0.48776	0.215433	0.116868
MDBSrug1_10112.1	1.13653	0.874217	0.626179	0.648206	0.633787	0.215758	0.117212
MDBSrug1_09866.1	1.47916	2.64587	0.414987	0.944983	0.329687	0.215973	0.117498
MDBSrug1_09167.1	0.775005	0.999431	1.2062	1.08879	1.29336	0.215997	0.117679
MDBSrug1_00794.1	0.273807	0.516335	0.200137	0.0367922	0.299856	0.216627	0.118191
MDBSrug1_03401.1	0.0642163	0.0582413	0.352617	0.199968	4.51245	0.216643	0.118369
MDBSrug1_05407.1	33.8686	25.584	19.0365	17.7924	0.619467	0.217007	0.118737
MDBSrug1_00981.1	1.05866	1.66642	0.494397	0.628056	0.411897	0.217725	0.119299
MDBSrug1_04684.1	4.89828	3.04872	1.32197	1.53412	0.359392	0.217997	0.119618
MDBSrug1_10073.1;MDBSrug1_09238.1;MDBSrug1_01414.1;MDBSrug1_10815.1;MDBSrug1_11772.1;MDBSrug1_09386.1;MDBSrug1_04370.1	61.9799	45.0415	30.3177	29.4004	0.558001	0.218025	0.119803
MDBSrug1_01326.1	2.58464	2.61702	1.25073	1.9629	0.61781	0.21837	0.120163
MDBSrug1_06956.1	0.386298	0.263073	0.457299	0.666694	1.73089	0.219069	0.120718
MDBSrug1_01608.1	0.0831538	0.0502311	0.174908	0.311085	3.64354	0.219289	0.12101
MDBSrug1_12578.1	0.436804	0.270626	0.125961	0.122461	0.351161	0.221002	0.122128
MDBSrug1_00328.1	37.5665	40.9476	13.7367	28.0438	0.53214	0.221756	0.122718
MDBSrug1_12739.1;MDBSrug1_01995.1	2.92323	3.1107	0.968451	2.0913	0.507091	0.221977	0.123013
MDBSrug1_11514.1	11.7984	12.7103	29.0102	19.9493	1.99764	0.222962	0.123733
MDBSrug1_07731.1	3.69178	2.19226	1.79177	0.740482	0.430359	0.223145	0.124008
MDBSrug1_06397.1	1.39672	1.89004	4.06406	7.06223	3.38519	0.224953	0.125188
MDBSrug1_11948.1	5.31084	10.4058	0.810852	1.25072	0.131171	0.22516	0.125479
MDBSrug1_11981.1	0.170539	0.0782413	0.248323	0.250059	2.0033	0.225378	0.125776
MDBSrug1_10878.1	3.23354	2.55754	1.96235	2.06649	0.695698	0.226494	0.126575
MDBSrug1_08704.2	2.73152	3.55771	1.01516	2.34543	0.534341	0.226608	0.126816
MDBSrug1_07852.1	0.197934	0.142168	0.211436	0.252037	1.36275	0.2273	0.12738
MDBSrug1_09726.1	0.346186	0.330376	1.02386	0.650598	2.47495	0.227335	0.127577
MDBSrug1_03351.1	0.0994258	0.199972	0.287214	0.278792	1.89048	0.227531	0.127864
MDBSrug1_01185.1	0.0112193	0.00814172	0.103492	0.215524	16.4772	0.227546	0.12805
MDBSrug1_07597.1	0.307262	0.199892	0.107948	0.149426	0.507488	0.227557	0.128234
MDBSrug1_12601.1	1.04033	0.592999	1.41698	1.39793	1.72342	0.229865	0.129713
MDBSrug1_00870.1	6.60807	8.09903	8.60561	9.38293	1.22312	0.230197	0.13008
MDBSrug1_12381.1	3.02903	2.73415	3.26978	3.90124	1.24428	0.230616	0.130497
MDBSrug1_00555.1	6.68711	3.53551	0.883937	1.89564	0.271905	0.231272	0.131048
MDBSrug1_10908.1	16.7296	12.8577	20.965	30.6645	1.74498	0.232073	0.131683
MDBSrug1_04039.1	3.10608	1.66255	0.459962	0.951226	0.295932	0.232761	0.132255
MDBSrug1_12629.1	5.88467	8.41377	3.77298	4.00393	0.543899	0.233103	0.132631
MDBSrug1_09898.1	1.41522	1.29425	2.62651	1.90241	1.67152	0.233423	0.132995
MDBSrug1_05369.1	0.843978	0.866932	0.472057	0.687249	0.677596	0.233527	0.133236
MDBSrug1_02282.1	0.899766	1.02652	7.67134	3.93898	6.0273	0.233853	0.133604
MDBSrug1_07461.1	3.70454	3.0169	1.69061	2.75297	0.661104	0.234287	0.134035
MDBSrug1_10913.1	2.33618	3.11497	1.68809	1.86836	0.652422	0.234417	0.134292
MDBSrug1_04665.1	2.49295	2.40199	3.60169	5.07115	1.7718	0.235038	0.134831
MDBSrug1_00546.1	5.9871	8.63916	10.1161	10.8137	1.43098	0.236387	0.135789
MDBSrug1_10084.1	0.0646807	0.0394684	0.223653	0.122283	3.32154	0.237148	0.136411
MDBSrug1_11457.1	0.136014	0.293216	0.962977	0.506183	3.42278	0.237621	0.136868
MDBSrug1_04907.1	2.65195	3.29903	2.17243	2.13412	0.72367	0.237643	0.137066
MDBSrug1_07437.1	0.552421	0.260398	0.151555	0.0227719	0.214472	0.238048	0.137486
MDBSrug1_00039.1	0.264039	0.392197	0.414247	0.531685	1.44145	0.238463	0.137911
MDBSrug1_09580.1	0.948075	0.788731	1.59718	2.60482	2.41939	0.240153	0.139076
MDBSrug1_08602.1	18.9668	15.4713	19.7692	24.2108	1.27708	0.240231	0.139308
MDBSrug1_12182.1	0.841107	1.18167	0.625809	0.569471	0.590909	0.241095	0.139997
MDBSrug1_07209.1	3.16031	1.63836	0.427784	0.869248	0.27029	0.241141	0.140211
MDBSrug1_07178.1	0.0920252	0.1007	0.989496	0.479992	7.62478	0.241637	0.140688
MDBSrug1_12266.1	0.0615829	0.0541093	0.15457	0.284431	3.79456	0.242194	0.141201
MDBSrug1_02110.1	0.144343	0.183546	0.395199	0.254798	1.98237	0.243051	0.14189
MDBSrug1_05185.1	2.69749	2.51059	1.25565	2.06211	0.637042	0.243066	0.142088
MDBSrug1_07380.1	36.4429	44.152	56.9257	46.1869	1.27939	0.243141	0.142322
MDBSrug1_12048.1	1.21305	0.808936	1.52783	1.48429	1.48968	0.243413	0.142671
MDBSrug1_09925.1	0.726979	0.620774	1.44069	2.49775	2.92223	0.243767	0.143069
MDBSrug1_10868.1	5.82831	6.71201	7.25635	9.04196	1.29967	0.244262	0.143549
MDBSrug1_06498.1	0.648862	1.09835	0.313101	0.323539	0.364375	0.244676	0.143983
MDBSrug1_08869.1	1.45041	0.876608	6.79476	3.46483	4.40889	0.24503	0.144382
MDBSrug1_09071.1	1.26852	0.528583	1.41861	1.90789	1.85103	0.245536	0.144872
MDBSrug1_12319.1	10.0259	12.9892	15.7873	13.4717	1.2713	0.245886	0.14527
MDBSrug1_05273.1	3.85553	2.19846	0.930059	1.12548	0.339534	0.24623	0.145665
MDBSrug1_11750.1	12.3137	10.3597	8.92518	8.96331	0.788962	0.246709	0.146141
MDBSrug1_06579.1	1.27412	0.626636	1.57488	2.74798	2.27429	0.246782	0.146377
MDBSrug1_07201.1	0.553449	0.458793	0.951289	1.60426	2.52464	0.249077	0.147932
MDBSrug1_08568.1;MDBSrug1_06287.1	0.898242	0.993967	1.32167	1.08149	1.27003	0.249361	0.148295
MDBSrug1_00924.1	2.7576	4.35578	1.55258	1.96351	0.494292	0.250124	0.148944
MDBSrug1_11154.1	1.13497	0.784747	4.93953	2.55698	3.90501	0.251173	0.149764
MDBSrug1_00790.1	0.756716	1.6457	2.46544	1.77105	1.76343	0.252614	0.15082
MDBSrug1_05623.1	0.976218	0.910131	1.49591	1.15719	1.40647	0.255005	0.152446
MDBSrug1_11423.1	0.230322	0.0921343	0.40452	0.247967	2.02349	0.256651	0.15363
MDBSrug1_08628.1	0.120858	0.171212	0.696379	0.361216	3.62102	0.256678	0.153847
MDBSrug1_02212.1	6.39293	5.1934	20.226	11.4567	2.73449	0.256883	0.15417
MDBSrug1_02875.1	0.264861	0.329681	0.154636	0.24997	0.680533	0.257519	0.154753
MDBSrug1_05232.1	4.11959	4.57262	5.4026	7.18954	1.44867	0.258149	0.155332
MDBSrug1_04110.1	0.0296686	0.0283455	0.378777	0.905048	22.1295	0.258165	0.155543
MDBSrug1_02348.1	7.08194	5.179	4.54451	3.79526	0.68019	0.258455	0.155919
MDBSrug1_06970.1	1.06157	2.15618	0.277457	0.634462	0.283403	0.25946	0.156728
MDBSrug1_11476.1	17.7309	24.7678	27.8367	41.2244	1.62502	0.259575	0.156999
MDBSrug1_01407.1	0.860743	0.870063	1.47801	1.10817	1.49421	0.259626	0.157232
MDBSrug1_03108.2;MDBSrug1_10352.1	9.94896	7.63688	5.73658	7.28644	0.74054	0.260204	0.157785
MDBSrug1_05693.1	0.0642412	0.0768583	0.729963	1.73841	17.4939	0.260267	0.158026
MDBSrug1_06659.1	12.66	13.897	12.5232	11.1364	0.8909	0.260864	0.158593
MDBSrug1_03938.1;REV__MDBSrug1_01786.1	13.5645	13.1838	9.81137	4.22907	0.524908	0.262207	0.159613
MDBSrug1_04580.1	3.29376	6.34491	1.17169	1.82562	0.310968	0.262757	0.160153
MDBSrug1_11856.1	1.55083	1.46016	1.59737	1.61322	1.06629	0.263549	0.160841
MDBSrug1_01981.1	0.0860707	0.136392	0.0559825	0.0525806	0.488007	0.263579	0.161065
MDBSrug1_06934.1	0.867406	0.434781	0.273218	0.132633	0.311669	0.263964	0.161506
MDBSrug1_04427.1	6.4227	5.04394	4.81784	2.92354	0.675122	0.264134	0.161815
MDBSrug1_10662.1	1.64957	0.703472	0.200773	0.0740482	0.116794	0.267217	0.163912
MDBSrug1_01703.1	0.0154664	0.0409431	0.152595	0.361605	9.11548	0.26871	0.165038
MDBSrug1_08534.1	2.10534	1.13717	2.29389	2.80774	1.57336	0.26918	0.165536
MDBSrug1_07883.1	1.65652	1.53016	1.76917	2.12054	1.22061	0.269849	0.166158
MDBSrug1_01847.1	41.0576	44.7661	40.1857	38.4642	0.916412	0.270521	0.166783
MDBSrug1_07276.1	0.958708	0.40963	0.241787	0.0387894	0.205049	0.271608	0.167664
MDBSrug1_08451.1	2.7469	2.87666	8.40108	4.90006	2.36525	0.271993	0.168114
MDBSrug1_08000.1	27.6154	30.9129	31.2812	33.5037	1.1069	0.272985	0.16894
MDBSrug1_03615.1	40.7138	34.7911	24.8171	33.775	0.776003	0.274117	0.169854
MDBSrug1_02886.1	0.228596	0.342003	0.740134	1.54725	4.00875	0.274661	0.170405
MDBSrug1_04557.1	0.875948	1.64639	0.372896	0.613258	0.390969	0.275588	0.171195
MDBSrug1_05807.1	4.24612	5.31059	5.85494	8.22583	1.47339	0.275597	0.171416
MDBSrug1_07144.1	7.61289	5.63409	4.31557	5.12386	0.712572	0.276333	0.172089
MDBSrug1_03481.1	58.673	80.7057	49.5247	44.6219	0.675474	0.276802	0.172596
MDBSrug1_11306.1	1.35936	1.4177	0.364719	1.01983	0.498565	0.277834	0.173457
MDBSrug1_03839.1	19.5392	27.8856	12.6412	18.9747	0.666652	0.278917	0.17435
MDBSrug1_01142.1	1.13504	1.95202	2.04786	2.54409	1.48748	0.281008	0.175876
MDBSrug1_04754.1	28.0634	24.634	54.9691	36.0182	1.7266	0.284596	0.178344
MDBSrug1_01405.2	1.92908	1.97302	2.76081	4.26799	1.80129	0.285727	0.179275
MDBSrug1_12538.1	3.07432	2.97501	3.89503	5.53375	1.55865	0.286468	0.179964
MDBSrug1_07016.1	2.42156	2.26198	8.71029	4.54409	2.82999	0.287656	0.180934
MDBSrug1_11092.1	2.59719	2.62163	1.66157	2.28315	0.755867	0.288549	0.181721
MDBSrug1_02724.1	2.54009	1.81298	2.84074	4.4553	1.67607	0.289177	0.182341
MDBSrug1_07444.1	1.98756	2.05959	1.77361	1.27594	0.753504	0.289376	0.182692
MDBSrug1_08281.1	1.85911	5.17166	0.122014	0.138184	0.0370085	0.289666	0.183101
MDBSrug1_06226.1	1.66343	1.34388	0.481858	1.20681	0.561521	0.290447	0.183822
MDBSrug1_03278.1	9.71787	16.5657	7.36287	5.71458	0.497552	0.291628	0.184796
MDBSrug1_06115.1	3.26802	2.19095	2.18667	1.07407	0.597318	0.291683	0.185059
MDBSrug1_03804.1	0.266967	0.427843	0.18464	0.184573	0.531387	0.292153	0.185585
MDBSrug1_02438.1	0.147597	0.153312	1.002	0.438597	4.78747	0.292255	0.185877
MDBSrug1_07711.1	0.0816758	0.129681	0.0526908	0.0700588	0.580769	0.292421	0.18621
MDBSrug1_11782.1	0.296385	0.546676	0.170448	0.167128	0.400416	0.292647	0.186582
MDBSrug1_08379.1	1.97388	1.84462	4.40396	2.74194	1.87139	0.293357	0.187264
MDBSrug1_03690.1	1.84458	2.60814	1.38199	1.67695	0.686984	0.293547	0.187614
MDBSrug1_07208.1	1.62636	0.773307	0.530606	0.273878	0.335249	0.294382	0.188377
MDBSrug1_05639.1	0.0769228	0.0503944	0.398861	1.0714	11.548	0.295169	0.18911
MDBSrug1_09319.1	1.04048	0.938133	4.22125	2.05923	3.17419	0.2959	0.18981
MDBSrug1_01669.1	0.0939853	0.0923278	0.2352	0.521346	4.06062	0.296078	0.190154
MDBSrug1_08531.1	0.186337	0.136118	0.212838	0.341901	1.72036	0.297494	0.191296
MDBSrug1_05947.1;MDBSrug1_00820.1	3.12515	2.32487	3.12154	4.05165	1.31618	0.297925	0.191805
MDBSrug1_01557.1	0.141685	0.460894	0.542886	1.18277	2.86378	0.298314	0.192288
MDBSrug1_10621.1	0.244917	0.373113	0.0260558	0.232082	0.417678	0.298657	0.192742
MDBSrug1_09750.1	1.96186	3.28361	1.20224	1.62449	0.538889	0.298771	0.193048
MDBSrug1_08306.1	52.1939	41.6818	38.3548	35.7981	0.789905	0.298892	0.193359
MDBSrug1_03111.1	1.16945	1.04678	0.854422	0.283649	0.513514	0.299562	0.194026
MDBSrug1_10076.1	0.241944	1.88293	2.64508	2.70083	2.51588	0.29967	0.19433
MDBSrug1_07056.1	0.518431	0.295976	1.03362	2.42939	4.25219	0.302747	0.196561
MDBSrug1_02475.1	35.7482	28.7888	42.035	35.5686	1.20247	0.303398	0.19722
MDBSrug1_08936.1	0.10375	0.0444189	0.0107013	0.0319546	0.287887	0.303617	0.197599
MDBSrug1_01561.1	0.735557	1.25134	4.86629	2.1668	3.53974	0.304391	0.19834
MDBSrug1_01321.1	0.436025	0.646557	0.137504	0.432881	0.526875	0.305512	0.199309
MDBSrug1_01761.1	5.02375	1.7823	0.294341	0.293919	0.0864319	0.305932	0.199821
MDBSrug1_07243.1	0.315358	0.835857	3.57129	1.45234	4.36377	0.30596	0.200078
MDBSrug1_05837.1	2.46218	1.64974	2.44247	3.13874	1.35732	0.306031	0.200363
MDBSrug1_12329.1	6.58928	4.45629	3.14987	4.25096	0.670027	0.306276	0.200762
MDBSrug1_06811.1	0.690863	0.385401	0.328857	0.213724	0.504133	0.307349	0.201705
MDBSrug1_05481.1;MDBSrug1_04122.1	0.838201	0.630791	0.54651	0.0247942	0.388909	0.310396	0.203947
MDBSrug1_01468.1	0.780818	1.76847	0.253523	0.553578	0.316599	0.310794	0.20445
MDBSrug1_10963.1	9.86283	10.0916	8.61412	9.58889	0.912227	0.31167	0.20527
MDBSrug1_01741.1	0.117736	0.144104	0.965344	0.3827	5.14836	0.312932	0.206345
MDBSrug1_04338.1	0.256323	0.227137	0.480786	1.0418	3.14935	0.314496	0.207621
MDBSrug1_03439.1	38.7077	36.6881	40.5001	47.9059	1.17256	0.314753	0.208037
MDBSrug1_02018.1	5.06663	1.95196	0.351711	1.24375	0.227318	0.316122	0.209188
MDBSrug1_07443.1	0.491848	0.469721	0.703591	1.23345	2.01446	0.316352	0.209586
MDBSrug1_01763.1	5.98781	6.36027	2.57721	5.1417	0.62511	0.31722	0.210409
MDBSrug1_00564.1	1.24807	1.2778	1.14798	0.867423	0.797905	0.317275	0.210693
MDBSrug1_12253.1	0.059435	0.0389317	0.315516	0.126463	4.49317	0.31744	0.211049
MDBSrug1_03498.1	0.517119	0.426579	1.06306	0.634502	1.79884	0.319602	0.212736
MDBSrug1_12745.1	1.50401	2.9226	7.12505	3.44034	2.3868	0.32123	0.21407
MDBSrug1_00149.1	3.77295	4.27274	4.27377	5.06386	1.16058	0.321447	0.214465
MDBSrug1_04062.1	0.685475	1.07575	0.514813	0.543929	0.601138	0.321513	0.21476
MDBSrug1_11524.1	2.18328	2.53244	2.56304	2.72499	1.12136	0.321653	0.215104
MDBSrug1_09485.1	1.65219	2.54661	1.71236	0.551145	0.539082	0.324733	0.217416
MDBSrug1_11884.1	0.411462	0.336409	0.724082	0.463369	1.58778	0.325425	0.218133
MDBSrug1_00002.1	8.19629	7.96927	6.24699	7.59051	0.855987	0.327001	0.219445
MDBSrug1_10778.2	4.09584	5.6206	4.05112	1.36789	0.557715	0.327179	0.21982
MDBSrug1_11286.1	0.114975	0.113034	0.575101	1.77981	10.3282	0.328087	0.220685
MDBSrug1_03415.1	0.248614	0.0919124	0.33193	0.260628	1.74013	0.328176	0.221001
MDBSrug1_08694.1;MDBSrug1_10105.1	30.4278	38.1064	30.1368	26.1451	0.821225	0.328711	0.221617
MDBSrug1_06277.1	0.141983	0.0605065	0.239054	0.135265	1.84858	0.328774	0.221916
MDBSrug1_00856.1	1.68845	2.156	1.51659	1.51632	0.788904	0.332746	0.224857
MDBSrug1_00692.1	4.29113	1.58156	5.98772	4.18285	1.73184	0.333741	0.225789
MDBSrug1_05077.1	1.11512	1.18645	2.16429	1.41642	1.55577	0.334769	0.226745
MDBSrug1_02996.1	2.00301	1.90717	2.12923	2.64841	1.22185	0.336277	0.228029
MDBSrug1_05313.1	0.215503	0.165248	0.331102	0.740969	2.81568	0.337402	0.229055
MDBSrug1_06251.1	0.756752	1.57479	0.538004	0.425704	0.413336	0.339072	0.230453
MDBSrug1_11888.1	0.659353	0.530973	0.716537	1.12204	1.54459	0.339127	0.230754
MDBSrug1_04994.1	2.46456	3.99289	1.88534	1.99509	0.600925	0.339628	0.23136
MDBSrug1_06481.1	2.30099	2.50273	2.1357	1.28283	0.711643	0.340678	0.232341
MDBSrug1_10460.1	0.890728	0.649744	1.36369	3.15771	2.93507	0.341032	0.232848
MDBSrug1_04826.1	0.930708	2.07672	0.873987	0.360442	0.41046	0.341149	0.233194
MDBSrug1_01270.1	3.40065	2.21958	1.86008	1.78776	0.649055	0.342645	0.234483
MDBSrug1_00828.1	3.16563	2.70751	2.76003	2.3627	0.872231	0.343618	0.235417
MDBSrug1_07818.1	4.42936	3.19226	1.78119	3.34831	0.673019	0.343998	0.235945
MDBSrug1_03499.1	8.33097	8.72055	10.5075	16.5595	1.58736	0.345123	0.236986
MDBSrug1_11632.1	2.93769	2.96352	2.67323	1.82274	0.761873	0.346276	0.238048
MDBSrug1_08438.2	1.83863	1.82789	0.908459	1.606	0.68579	0.346546	0.238504
MDBSrug1_02628.1	2.02389	2.71002	1.01979	2.08725	0.656337	0.346662	0.238854
MDBSrug1_12217.1;MDBSrug1_06805.1	0.456546	0.132817	0.0323057	0.0229511	0.0937568	0.34671	0.239157
MDBSrug1_02764.1	43.2658	46.1952	43.3258	37.8321	0.907188	0.346957	0.239598
MDBSrug1_09162.1	40.2602	40.0563	12.1459	33.325	0.566146	0.347658	0.240353
MDBSrug1_01096.1	0.0391969	0.144678	0.311351	0.136181	2.43389	0.349385	0.241819
MDBSrug1_11377.1	0.0384774	0.209522	0.341084	1.09613	5.79523	0.350569	0.242912
MDBSrug1_01012.1	19.5867	19.7877	21.6666	20.1293	1.0615	0.356626	0.247387
MDBSrug1_10374.1	12.2638	12.5646	13.0928	15.4782	1.15074	0.358013	0.248628
MDBSrug1_04526.1	35.9538	28.9448	40.6776	34.9962	1.16603	0.35923	0.249753
MDBSrug1_09245.1	0.0444531	0.0536073	2.03828	0.495277	25.8367	0.359506	0.250225
MDBSrug1_01362.1	0.699192	1.6078	0.384769	0.511616	0.388552	0.360419	0.251142
MDBSrug1_06683.1	1.42061	0.482208	0.194815	0.240495	0.228771	0.361692	0.252311
MDBSrug1_01230.1	0.12744	0.281884	2.8734	0.785121	8.93794	0.362527	0.253175
MDBSrug1_06810.1;MDBSrug1_00928.1;MDBSrug1_00326.1	25.341	23.1514	41.5985	27.8832	1.43284	0.363558	0.254179
MDBSrug1_10761.1	3.05416	3.17866	3.2366	3.72666	1.11719	0.365339	0.255709
MDBSrug1_06167.1	1.90579	2.30006	1.84684	1.76525	0.858827	0.365431	0.256058
MDBSrug1_10492.1	0.034619	0.0185299	0.0101206	0.0198784	0.564433	0.365572	0.256442
MDBSrug1_03131.1	2.49468	1.5848	0.941673	1.73371	0.655814	0.366449	0.257343
MDBSrug1_09814.1	2.56011	1.46283	0.58468	1.66017	0.558011	0.36674	0.257833
MDBSrug1_04170.1	0.647126	0.940694	0.654178	0.514819	0.736227	0.367463	0.258627
MDBSrug1_08210.1	1.85794	0.801252	0.760365	0.375362	0.427094	0.368537	0.25967
MDBSrug1_07317.1	0.0523003	0.158213	0.914746	0.266361	5.61061	0.369941	0.260948
MDBSrug1_02213.1	0.0361416	0.0767672	0.0784739	0.0928441	1.51731	0.370062	0.261322
MDBSrug1_08669.1	17.8734	16.9425	18.9603	17.6959	1.05286	0.370793	0.262127
MDBSrug1_11639.1	0.529489	0.614513	0.602952	0.758443	1.19003	0.374197	0.264825
MDBSrug1_12105.1	2.17176	1.2502	1.01627	1.02862	0.597581	0.375423	0.265986
MDBSrug1_10836.1	7.57319	11.7291	6.80401	6.34705	0.681322	0.375945	0.266649
MDBSrug1_11181.1	0.52474	0.697666	0.495765	0.472532	0.792124	0.377023	0.267707
MDBSrug1_10816.1	0.344928	0.719977	0.0640308	0.418893	0.45349	0.377028	0.268004
MDBSrug1_00403.1	1.43496	2.1675	2.23479	4.39449	1.84021	0.379219	0.269857
MDBSrug1_07202.1	1.46456	1.28281	1.52569	2.24521	1.37255	0.379974	0.270691
MDBSrug1_02070.1	0.354824	0.238344	0.0838407	0.261833	0.582758	0.380596	0.271431
MDBSrug1_06206.1	0.81293	0.848435	0.749639	0.396116	0.689647	0.380713	0.271811
MDBSrug1_03943.1	12.2609	29.7308	7.73496	8.89236	0.395966	0.383131	0.273835
MDBSrug1_08800.1	2.14978	1.42743	0.420905	1.57312	0.557423	0.383233	0.274207
MDBSrug1_10088.1	0.343978	0.252538	0.395976	0.870464	2.12306	0.386051	0.276524
MDBSrug1_10563.1	24.9288	15.2772	43.5699	23.6059	1.67079	0.386146	0.276893
MDBSrug1_11435.1	0.429503	1.20171	0.502534	0.0855544	0.360522	0.386291	0.277299
MDBSrug1_06912.1	0.317991	0.332812	0.281773	0.0760714	0.549851	0.388752	0.279368
MDBSrug1_05702.1	0.784646	0.854866	0.178836	0.711656	0.543145	0.390547	0.280963
MDBSrug1_11934.1	0.304356	0.147604	0.330839	0.899372	2.72195	0.390681	0.281364
MDBSrug1_05449.1	14.5169	3.96591	2.64464	1.05534	0.200185	0.390684	0.28167
MDBSrug1_04413.1	2.62774	2.4037	2.42871	1.90047	0.860425	0.392915	0.283585
MDBSrug1_04808.1	0.149982	0.324889	0.526612	1.98455	5.2881	0.393025	0.283971
MDBSrug1_01268.2	1.58397	1.6531	2.68613	1.79445	1.38415	0.394948	0.285668
MDBSrug1_09476.1	6.411	6.82868	7.29186	10.7744	1.36455	0.395385	0.286292
MDBSrug1_07822.2	3.82753	2.39306	2.36354	1.93858	0.691593	0.396948	0.287733
MDBSrug1_02124.1	1.08053	1.50188	1.40966	1.76452	1.22916	0.39787	0.288712
MDBSrug1_07564.1	3.80095	3.23882	4.00858	3.76355	1.10403	0.399526	0.290225
MDBSrug1_12427.1	0.90331	0.936653	0.965862	1.22043	1.18823	0.40062	0.291332
MDBSrug1_05044.1	0.0358226	0.0334883	0.21704	0.0631543	4.04256	0.40128	0.292125
MDBSrug1_06470.1	2.62345	1.99345	2.58006	4.418	1.51575	0.404906	0.29508
MDBSrug1_08646.1	0.2701	0.583552	0.282968	0.167261	0.527416	0.405923	0.296137
MDBSrug1_12688.1	1.21897	0.925896	1.48097	3.90983	2.51335	0.406535	0.296901
MDBSrug1_03283.1	4.72992	12.5441	3.08337	3.76396	0.396394	0.40815	0.298398
MDBSrug1_05762.1	1.51464	2.61628	1.49403	1.21216	0.655106	0.410105	0.300147
MDBSrug1_00304.1	3.40285	3.26596	6.03839	3.71376	1.46235	0.410674	0.300883
MDBSrug1_03591.1	2.5464	1.86477	2.44491	4.24448	1.51647	0.411111	0.301524
MDBSrug1_07605.1	1.94056	1.15282	1.08788	0.972958	0.666209	0.411511	0.302139
MDBSrug1_05938.1	12.4821	10.9886	11.2764	7.72593	0.809618	0.411819	0.302686
MDBSrug1_00715.1	8.05203	7.87934	3.10278	7.30387	0.653218	0.413603	0.304319
MDBSrug1_04804.1	6.89658	6.57029	6.9808	8.69086	1.16372	0.414573	0.305356
MDBSrug1_10775.1	1.06922	1.50165	1.19884	0.644719	0.717095	0.414929	0.305941
MDBSrug1_09376.1	0.35229	0.361673	0.427266	0.881654	1.83332	0.415152	0.306429
MDBSrug1_04626.1	1.41554	0.670746	1.40515	1.62197	1.45096	0.415862	0.307278
MDBSrug1_05893.1	1.68087	1.25009	1.7128	3.54287	1.79316	0.416998	0.308442
MDBSrug1_07703.1	1.66471	1.10148	1.68073	1.80061	1.25854	0.418315	0.309743
MDBSrug1_01277.1	5.70107	5.97666	5.94075	6.77438	1.08883	0.418901	0.310503
MDBSrug1_00192.1	1.60555	2.38253	1.44369	1.552	0.75116	0.419884	0.311559
MDBSrug1_05212.1	2.34111	2.03597	2.02693	1.96529	0.912075	0.42101	0.312722
MDBSrug1_09358.1	4.01042	5.71998	3.57384	4.02574	0.781015	0.421631	0.313512
MDBSrug1_00617.1	0.850748	2.24229	0.346588	1.05283	0.452441	0.423031	0.314883
MDBSrug1_10365.1	0.93007	1.40854	0.584976	1.07318	0.709036	0.424449	0.316269
MDBSrug1_00164.1	0.130145	0.0434013	0.19997	0.103142	1.74658	0.425012	0.31702
MDBSrug1_10423.1	1.15035	1.05743	0.286925	1.01091	0.587845	0.42536	0.317611
MDBSrug1_06909.1	41.1179	52.4064	30.0137	44.78	0.799726	0.425858	0.318314
MDBSrug1_09530.1	2.03115	0.915196	2.50368	1.80608	1.46275	0.426334	0.319003
MDBSrug1_06851.1	1.9871	2.04155	2.22144	3.81322	1.49794	0.426838	0.319713
MDBSrug1_03064.1	7.87481	7.24986	9.56504	7.75512	1.14516	0.426854	0.320058
MDBSrug1_02233.1	0.0351382	0.0443495	0.0698006	0.0425988	1.41405	0.427988	0.321242
MDBSrug1_11843.1	1.53839	0.552032	0.385324	0.47091	0.4096	0.428078	0.321643
MDBSrug1_02890.1	0.911852	1.53978	1.34959	1.97361	1.3555	0.428654	0.32241
MDBSrug1_00151.1	1.52882	1.84286	0.732885	1.59895	0.691595	0.429682	0.323517
MDBSrug1_07489.1	1.11565	0.726864	0.473869	0.843868	0.715183	0.431516	0.325235
MDBSrug1_05491.1	0.316648	0.664314	0.618967	0.774904	1.42092	0.431547	0.325595
MDBSrug1_06780.1	8.71872	6.7712	8.96068	8.9475	1.15612	0.431614	0.325981
MDBSrug1_03359.1	1.98199	0.936881	0.236875	1.25725	0.511883	0.432269	0.326813
MDBSrug1_12110.1	0.276707	1.39055	0.112261	0.180515	0.175603	0.432986	0.327693
MDBSrug1_08002.1	0.874885	0.990267	0.901098	0.565944	0.786554	0.43398	0.328783
MDBSrug1_10242.1	1.1097	1.29015	1.22765	1.50193	1.13739	0.434812	0.329752
MDBSrug1_03237.1	0.620862	0.97251	0.859008	1.22826	1.30997	0.435134	0.330335
MDBSrug1_07653.1	4.916	4.25202	7.78378	4.86722	1.37991	0.437368	0.332373
MDBSrug1_03414.1	3.52531	1.13256	2.71117	7.18305	2.1242	0.437515	0.332825
MDBSrug1_10293.1	0.109442	0.135771	0.184111	0.127225	1.26965	0.439079	0.334357
MDBSrug1_01670.1	0.971539	0.99613	0.779228	0.966106	0.887006	0.442585	0.337372
MDBSrug1_02827.1	0.207751	0.932897	1.1667	0.802838	1.72668	0.445394	0.33986
MDBSrug1_08215.1	0.398455	0.650028	0.624958	1.83012	2.34156	0.445666	0.340415
MDBSrug1_08021.1	1.13731	0.485043	1.24304	1.14271	1.47055	0.447016	0.341795
MDBSrug1_06680.1	6.71085	7.17814	2.66801	6.60126	0.667382	0.447086	0.342197
MDBSrug1_09374.1	9.54278	11.6875	11.4347	12.2388	1.11508	0.447282	0.342695
MDBSrug1_01351.2	0.170082	0.097029	0.0494434	0.121504	0.639986	0.447629	0.34331
MDBSrug1_06684.1	2.59268	3.0539	2.76606	2.13533	0.868028	0.448702	0.344483
MDBSrug1_08220.1	5.04679	3.54912	6.29508	4.49909	1.25573	0.449166	0.345189
MDBSrug1_07929.1	30.6273	24.2151	29.1608	33.0107	1.13364	0.449327	0.345663
MDBSrug1_10751.1	0.502517	0.308788	0.0810075	0.384326	0.573562	0.452789	0.348679
MDBSrug1_04888.1	0.335408	0.245435	0.33986	0.998297	2.30382	0.453191	0.349342
MDBSrug1_11851.1	11.1866	5.48685	4.68654	5.43929	0.607301	0.453733	0.350114
MDBSrug1_09165.1	0.0741192	0.0472846	0.146751	0.0652544	1.74628	0.456913	0.352924
MDBSrug1_05605.1	0.0174924	0.0981275	0.0210782	0.00385518	0.215649	0.457527	0.353755
MDBSrug1_01463.1	9.02885	10.4172	9.56615	6.29516	0.815657	0.459891	0.355941
MDBSrug1_10545.1	0.814985	0.585088	0.675075	0.134819	0.578465	0.461006	0.357163
MDBSrug1_08223.1	17.335	20.4308	19.1578	24.2939	1.15056	0.461224	0.357691
MDBSrug1_08729.1	78.1633	64.1662	81.2368	76.2943	1.10681	0.464174	0.360341
MDBSrug1_08097.1	0.564684	0.714286	0.681806	1.51044	1.71407	0.465373	0.361635
MDBSrug1_12351.1	0.63309	1.26688	0.878463	0.181253	0.557755	0.467343	0.363529
MDBSrug1_04753.1	3.16673	1.41338	2.49617	4.35921	1.49678	0.467944	0.364362
MDBSrug1_10966.1	7.99568	9.20376	8.812	13.7916	1.31421	0.468085	0.364837
MDBSrug1_06634.1	3.17279	3.39852	2.31897	3.2465	0.846936	0.468313	0.365379
MDBSrug1_02957.1	18.601	17.2954	21.4573	18.0657	1.10103	0.468879	0.366186
MDBSrug1_02044.2	2.5012	1.08907	0.956911	1.09767	0.572262	0.472134	0.369096
MDBSrug1_01819.1	0.587474	11.276	0.141839	0.0662356	0.017539	0.472463	0.369722
MDBSrug1_10397.1	2.90342	2.63682	1.77446	2.73797	0.814482	0.472559	0.370165
MDBSrug1_09508.1	1.46548	1.20484	1.2487	1.14673	0.897056	0.473537	0.3713
MDBSrug1_01916.1	0.0291451	0.237285	0.0191697	0.0222591	0.155496	0.475203	0.372977
MDBSrug1_00949.1	1.82012	0.186483	0.168621	0.0756578	0.121737	0.475494	0.373576
MDBSrug1_08054.1	0.00426207	0.0702334	0.0788623	1.27857	18.2217	0.478304	0.376157
MDBSrug1_12602.1	33.4313	27.5646	30.803	39.3537	1.15019	0.480384	0.378167
MDBSrug1_00939.2;MDBSrug1_01839.1	3.28259	0.34132	3.57029	3.15577	1.85602	0.480884	0.378935
MDBSrug1_06844.1	0.608067	0.506426	0.669786	4.93209	5.02639	0.483561	0.381421
MDBSrug1_08266.1	0.219065	0.298486	0.450827	0.260904	1.37519	0.484149	0.382262
MDBSrug1_01165.1	0.853442	5.01998	1.16052	0.388976	0.263815	0.484767	0.383129
MDBSrug1_03571.1	0.210477	0.32251	0.646595	0.27132	1.72221	0.484997	0.383688
MDBSrug1_01433.1	5.56426	4.39596	3.74154	4.85546	0.863134	0.487479	0.386032
MDBSrug1_06731.1;MDBSrug1_02844.1;MDBSrug1_09158.1	0.613809	0.591007	0.608869	0.945185	1.28987	0.487486	0.386417
MDBSrug1_04326.1	0.86652	0.191605	0.192229	0.16508	0.337681	0.487832	0.387072
MDBSrug1_05000.1	2.44584	1.29345	1.0233	1.55102	0.688452	0.488362	0.387873
MDBSrug1_06248.1	6.9781	4.42066	9.30207	5.8058	1.3254	0.489107	0.388845
MDBSrug1_06390.1	1.7004	1.2535	1.18049	1.32418	0.847923	0.491218	0.390907
MDBSrug1_03296.1	2.89952	2.46762	5.93705	2.71474	1.61199	0.492057	0.391958
MDBSrug1_03818.1	18.0035	22.5083	13.3695	20.148	0.827352	0.492138	0.392406
MDBSrug1_07096.1	0.315751	0.271537	0.293268	0.38609	1.15677	0.495385	0.395381
MDBSrug1_03620.1	0.286283	0.0955834	0.193897	1.88976	5.45651	0.497608	0.397543
MDBSrug1_08023.6	6.17389	7.40979	6.05319	6.31502	0.91052	0.501498	0.401042
MDBSrug1_08136.1	0.397888	0.112294	0.259012	0.654977	1.7915	0.502517	0.402249
MDBSrug1_06082.1	0.457858	0.425652	1.17765	0.437624	1.82824	0.503379	0.403331
MDBSrug1_01805.1	1.01318	0.994991	1.00706	0.503385	0.75215	0.50365	0.403941
MDBSrug1_01487.1	0.253814	0.273625	0.261837	0.53805	1.51655	0.50385	0.404494
MDBSrug1_09315.1	0.231963	0.669835	0.427377	2.16047	2.86965	0.503908	0.404933
MDBSrug1_04908.1	2.79074	1.53278	0.677775	2.10712	0.644125	0.505062	0.406254
MDBSrug1_03322.1	0.958779	2.21218	3.0466	1.63093	1.47512	0.51019	0.410777
MDBSrug1_06778.1	1.06532	0.709163	0.869105	1.60369	1.39353	0.51058	0.411489
MDBSrug1_03793.1	0.199245	0.524917	0.109635	0.301022	0.567078	0.511084	0.412293
MDBSrug1_06732.1	0.012391	0.013004	0.00468802	0.0128449	0.690409	0.511177	0.412767
MDBSrug1_10651.1	6.69774	12.5048	6.92421	6.71802	0.710438	0.513697	0.415201
MDBSrug1_06246.1	4.97306	3.86818	3.47028	4.27691	0.876256	0.514392	0.416164
MDBSrug1_00785.1;MDBSrug1_02007.1;MDBSrug1_06146.1;MDBSrug1_03202.1;MDBSrug1_01528.1;MDBSrug1_10185.1;MDBSrug1_01822.2;MDBSrug1_11516.1;MDBSrug1_04229.1;MDBSrug1_01969.1	0.584603	0.216044	0.144728	0.312645	0.571254	0.517	0.418677
MDBSrug1_10611.1	1.64039	1.30023	0.81799	1.49248	0.785709	0.517332	0.419349
MDBSrug1_05638.1	0.0380733	0.0713091	0.0370455	0.656436	6.33998	0.518398	0.420618
MDBSrug1_12280.1	0.132899	0.365663	0.0731812	0.206807	0.561592	0.519072	0.421569
MDBSrug1_09294.1	0.849011	1.15003	0.803159	0.918386	0.861186	0.51987	0.422622
MDBSrug1_12056.1	0.529489	0.0994935	0.0823094	0.145303	0.361874	0.520133	0.423242
MDBSrug1_07578.1	26.3458	24.9237	25.9104	18.1788	0.85995	0.520908	0.424278
MDBSrug1_00511.1	0.25761	0.254212	0.158364	0.259295	0.816025	0.521973	0.425552
MDBSrug1_12170.1	5.879	6.52988	2.65251	6.34381	0.724991	0.522558	0.426437
MDBSrug1_06040.1	1.33242	1.07507	3.3085	1.11332	1.83669	0.526205	0.429823
MDBSrug1_01247.1	1.29188	2.75805	1.05437	1.67318	0.673481	0.527558	0.431339
MDBSrug1_07346.2	0.125027	0.0301696	0.00521988	0.0627123	0.437718	0.528657	0.43265
MDBSrug1_07278.1	7.90175	8.8082	8.25831	10.2039	1.10487	0.528892	0.433254
MDBSrug1_08433.1	4.05862	3.14861	2.71439	3.56298	0.870983	0.533125	0.437138
MDBSrug1_00171.1	0.854788	1.86762	2.09369	1.53712	1.33368	0.533825	0.438128
MDBSrug1_02676.1	0.979762	0.642857	0.778267	0.526698	0.804234	0.534267	0.438907
MDBSrug1_04832.1	0.567697	0.582925	0.725302	0.566795	1.12296	0.535383	0.440241
MDBSrug1_11835.1	0.125732	0.159471	0.146226	0.0856963	0.813183	0.540855	0.445162
MDBSrug1_03217.1	0.681257	0.358452	0.438399	0.322639	0.731972	0.542059	0.446575
MDBSrug1_02670.1	3.91685	2.11707	2.5548	1.92605	0.742609	0.542213	0.447125
MDBSrug1_05351.1	1.00826	0.952476	0.436032	1.01715	0.741142	0.54227	0.447595
MDBSrug1_08114.1	0.815765	0.275253	0.637608	0.924833	1.43209	0.542597	0.448287
MDBSrug1_09465.1	0.441944	0.375179	0.384066	0.743523	1.37995	0.544282	0.450104
MDBSrug1_12510.1	0.243262	0.239761	0.224992	0.477762	1.45491	0.544429	0.45065
MDBSrug1_04063.1	0.261519	0.232806	0.472797	0.230111	1.42196	0.547045	0.453242
MDBSrug1_12741.1	0.118856	0.237262	0.207689	0.248234	1.28026	0.550037	0.456149
MDBSrug1_11415.1	2.92086	2.33756	3.09054	2.68457	1.09826	0.550561	0.457013
MDBSrug1_08594.1;MDBSrug1_11885.2;MDBSrug1_05768.1;MDBSrug1_12121.1	0.0460374	0.0178349	0.261283	0.0132386	4.29797	0.550912	0.457734
MDBSrug1_12459.1	2.84348	0.549061	0.768687	0.6776	0.426314	0.552038	0.459099
MDBSrug1_00240.1	59.435	50.6949	56.6039	37.6112	0.85549	0.553462	0.460715
MDBSrug1_11468.1;MDBSrug1_04049.1	0.436734	0.345737	0.636905	0.368984	1.28553	0.553597	0.461259
MDBSrug1_07494.1	0.851138	1.06466	0.988645	0.592905	0.825533	0.554149	0.462151
MDBSrug1_01929.1	0.841107	0.243193	0.392943	2.13829	2.33444	0.555526	0.463732
MDBSrug1_12583.1	4.37655	1.70603	1.85283	1.99132	0.631994	0.555707	0.464316
MDBSrug1_01146.1	10.454	9.76209	10.1657	9.21022	0.958439	0.556374	0.465307
MDBSrug1_00711.1	2.89541	2.39886	1.84743	2.71612	0.861979	0.557542	0.466719
MDBSrug1_04989.1	0.075303	0.0490757	0.197433	0.0487573	1.97936	0.561299	0.470301
MDBSrug1_03554.1	0.333639	0.692658	0.525761	0.82238	1.3136	0.563146	0.472287
MDBSrug1_01114.1	0.277327	0.146522	0.185283	0.132568	0.749916	0.56345	0.472982
MDBSrug1_10730.1	0.688311	0.201912	0.719791	0.561646	1.43946	0.565485	0.47513
MDBSrug1_04208.1	0.454562	1.23802	0.647705	0.425867	0.634281	0.571477	0.480611
MDBSrug1_10904.1;MDBSrug1_08294.1	0.0379776	0.056938	0.032805	0.171648	2.15405	0.57378	0.482995
MDBSrug1_09491.1	0.160973	0.338093	0.247875	0.412001	1.32222	0.574317	0.483895
MDBSrug1_01660.1	1.28628	1.4041	1.79188	1.29001	1.14552	0.576024	0.485782
MDBSrug1_03375.1	1.88414	0.75572	0.958316	0.798784	0.665605	0.576357	0.486512
MDBSrug1_09062.1	0.27397	0.149744	0.19676	0.128701	0.768113	0.577	0.487505
MDBSrug1_09262.1	0.417098	0.554707	0.294729	0.50598	0.823941	0.577104	0.488042
MDBSrug1_00472.2	1.425	1.77507	1.48204	1.44622	0.915061	0.579142	0.490217
MDBSrug1_05272.1	10.4696	10.2168	8.82864	10.5433	0.936454	0.58257	0.493573
MDBSrug1_07455.1	3.052	1.66369	2.82254	2.95747	1.2257	0.583128	0.4945
MDBSrug1_02081.1	3.58545	2.17462	1.99397	2.68259	0.811893	0.583695	0.495435
MDBSrug1_00867.1	0.356135	0.338691	0.424751	0.336862	1.09612	0.584711	0.496754
MDBSrug1_10103.2	0.0591763	0.0293409	0.0464807	0.0130817	0.672891	0.584949	0.497412
MDBSrug1_00093.1	2.15131	2.17627	3.69076	1.9582	1.30534	0.585189	0.498072
MDBSrug1_10054.1	0.541788	0.304809	0.289267	0.379088	0.78946	0.587514	0.500509
MDBSrug1_00369.1	2.19845	2.24969	2.10493	3.06025	1.1612	0.589955	0.503048
MDBSrug1_10170.1;MDBSrug1_08392.1	0.0112636	0.0181508	0.0146991	0.00901074	0.806064	0.590476	0.503952
MDBSrug1_12398.1	0.341728	0.112743	0.206106	0.0736469	0.615558	0.591067	0.504918
MDBSrug1_05506.1	0.249128	0.670746	0.683545	0.548388	1.33924	0.592224	0.506368
MDBSrug1_01855.1;MDBSrug1_00226.1	1.82296	1.23944	2.36698	1.42096	1.23692	0.592373	0.506957
MDBSrug1_11657.1	0.590133	0.345054	0.638717	0.484046	1.20058	0.594294	0.509064
MDBSrug1_03733.1	0.715602	1.28907	1.15775	1.26613	1.20911	0.596858	0.511725
MDBSrug1_12005.1	1.54838	0.963233	1.08159	1.0017	0.829465	0.59697	0.512287
MDBSrug1_03157.1	34.8214	44.1121	51.3555	37.9189	1.13101	0.598378	0.513961
MDBSrug1_01007.1	0.975473	1.53648	0.793875	1.26377	0.819142	0.599745	0.515603
MDBSrug1_02122.1	0.262841	0.102749	0.156282	0.385121	1.4809	0.599831	0.516144
MDBSrug1_03952.1	0.178355	0.0457251	0.0824167	0.0461301	0.573665	0.6008	0.517447
MDBSrug1_02048.1	1.64149	2.37433	1.74605	3.59331	1.32958	0.60335	0.520113
MDBSrug1_10556.1	1.37336	0.817245	1.85764	0.98212	1.29634	0.605147	0.522134
MDBSrug1_08645.1	0.0480612	0.108765	0.119954	0.0814433	1.28421	0.60827	0.525303
MDBSrug1_07071.1	1.28993	0.287382	0.845286	1.46475	1.46454	0.608331	0.525829
MDBSrug1_10782.1;MDBSrug1_00659.1	1.90863	0.716904	1.62899	1.83296	1.31857	0.609457	0.527278
MDBSrug1_04426.1	1.31272	0.337353	0.315679	0.653395	0.587292	0.610725	0.52885
MDBSrug1_02692.1	0.604842	0.386847	0.618486	0.522441	1.15049	0.618874	0.536389
MDBSrug1_09316.1	22.1617	19.7649	27.0514	19.7912	1.11725	0.620048	0.537891
MDBSrug1_06496.1	1.47469	1.10694	1.37297	1.4549	1.09538	0.623329	0.541223
MDBSrug1_00969.1	19.4598	20.9226	19.1959	25.194	1.09924	0.623898	0.542203
MDBSrug1_00314.1	1.44698	2.40205	3.07771	1.72718	1.24834	0.62734	0.545683
MDBSrug1_03947.1	3.07308	4.33483	3.08082	3.49434	0.887585	0.627828	0.546597
MDBSrug1_06420.1	0.339704	0.239795	0.175249	0.308778	0.83525	0.628761	0.547899
MDBSrug1_06721.1	3.10186	2.78913	2.85993	3.38305	1.05975	0.633047	0.552128
MDBSrug1_01317.2;MDBSrug1_03653.1;MDBSrug1_12410.1	1.61335	1.7535	1.74313	1.40454	0.934901	0.635298	0.554586
MDBSrug1_11133.1	3.71411	3.60256	3.07209	3.78828	0.937635	0.638334	0.557734
MDBSrug1_05734.2	0.842312	0.622311	0.532493	0.760349	0.882713	0.641983	0.561423
MDBSrug1_10747.1	2.87978	1.93483	2.45963	2.96298	1.12628	0.642339	0.562235
MDBSrug1_04878.1	0.136687	0.022761	0.298406	0.0305968	2.06338	0.642344	0.562739
MDBSrug1_06525.1	0.658326	1.09835	1.05881	0.97389	1.15713	0.642697	0.563549
MDBSrug1_01606.1	0.403452	0.569607	0.478381	0.608676	1.11715	0.646024	0.56697
MDBSrug1_02523.1	1.10548	1.39004	0.979473	1.29029	0.909535	0.646116	0.567555
MDBSrug1_08510.1	2.3824	1.92863	1.14802	2.39039	0.820781	0.646168	0.568104
MDBSrug1_09964.1	1.42656	2.04308	1.2683	1.77531	0.87721	0.648644	0.570786
MDBSrug1_08163.1	4.46339	4.04217	2.14077	4.76505	0.811918	0.651054	0.573414
MDBSrug1_01676.1	2.17165	4.63984	2.76695	6.40057	1.34589	0.651671	0.574466
MDBSrug1_04883.1	0.65868	1.17262	1.38555	0.837705	1.21403	0.654042	0.577066
MDBSrug1_06344.1	15.851	14.1901	19.9171	13.788	1.12197	0.656614	0.579847
MDBSrug1_11433.1	1.40299	1.07706	0.764064	3.07675	1.54868	0.66113	0.58435
MDBSrug1_04192.1	0.366697	0.272248	0.38255	0.316071	1.0934	0.661912	0.585557
MDBSrug1_06729.1	36.8966	57.5868	52.4097	23.9526	0.808208	0.662029	0.586177
MDBSrug1_11730.1	53.7038	48.5128	50.786	54.7861	1.03283	0.662462	0.587077
MDBSrug1_12425.1	2.34809	2.70973	2.03691	2.64873	0.926416	0.663094	0.588154
MDBSrug1_06437.1;MDBSrug1_02823.1;MDBSrug1_06367.1	0.281162	0.184354	0.102116	0.725157	1.77711	0.6648	0.590185
MDBSrug1_11895.1	180.981	177.245	225.428	166.779	1.09486	0.665628	0.591439
MDBSrug1_04901.1	0.723825	1.94411	0.698006	1.26163	0.734513	0.669194	0.595129
MDBSrug1_02337.1	10.4505	11.9727	8.55457	11.9311	0.913593	0.672015	0.598162
MDBSrug1_07758.1	0.657014	1.16995	1.03381	1.07914	1.15653	0.676108	0.602332
MDBSrug1_03354.1	1.72312	1.02943	1.81303	1.35119	1.14956	0.676514	0.60322
MDBSrug1_03321.1	0.0327125	0.290296	0.100718	0.079554	0.558102	0.677779	0.604877
MDBSrug1_06148.1	2.90349	3.46557	5.6001	2.48324	1.26916	0.679673	0.607097
MDBSrug1_02907.1	0.192748	0.533125	0.359618	0.174965	0.736469	0.682531	0.610181
MDBSrug1_08367.1	1.07624	1.97023	1.88035	1.65238	1.15961	0.682888	0.611033
MDBSrug1_03890.1	0.409619	0.359448	0.343803	0.519846	1.12298	0.686458	0.614762
MDBSrug1_04118.1	0.586659	0.775185	0.474498	0.73582	0.888735	0.688475	0.617106
MDBSrug1_08208.1	0.10347	0.0359806	0.072116	0.0294348	0.728221	0.689216	0.618307
MDBSrug1_00973.1	2.05951	2.11406	2.09602	2.1063	1.00689	0.691079	0.620517
MDBSrug1_07860.1	0.719784	0.153534	0.388098	0.187967	0.659627	0.693724	0.623432
MDBSrug1_02050.1	0.466896	0.201366	0.166598	0.353181	0.777806	0.696657	0.626612
MDBSrug1_09098.1	0.115581	0.359732	0.0292991	0.286544	0.664494	0.697107	0.627559
MDBSrug1_03314.1	3.10027	2.44895	2.80856	3.07882	1.06094	0.698299	0.629177
MDBSrug1_12705.1	0.0347916	0.0960615	0.0803861	0.0813704	1.23617	0.702603	0.633602
MDBSrug1_12249.1	209.35	267.928	261.612	245.242	1.06197	0.702884	0.634403
MDBSrug1_09954.1	12.923	10.8509	10.5603	12.0815	0.952382	0.706039	0.637801
MDBSrug1_05248.1	0.632736	0.617302	0.142242	0.788445	0.744527	0.707793	0.639938
MDBSrug1_09226.1	0.00384419	0.0338976	0.0219066	0.0307294	1.39464	0.707855	0.640545
MDBSrug1_01920.1	0.317155	0.714115	0.680771	0.545186	1.18878	0.711304	0.644221
MDBSrug1_08774.1	0.445169	0.663973	0.454969	0.548307	0.904552	0.717061	0.649994
MDBSrug1_08364.1	0.777486	0.616221	1.42468	0.435678	1.33483	0.719399	0.652674
MDBSrug1_05626.1	2.23623	2.4218	2.82372	2.15054	1.06789	0.721172	0.654844
MDBSrug1_08853.1	1.59981	1.52886	1.53675	1.64703	1.01761	0.721196	0.655428
MDBSrug1_01734.1	1.47239	0.93284	0.795724	2.32183	1.29616	0.724026	0.658565
MDBSrug1_01484.1	3.29967	2.74593	2.76136	3.76238	1.07909	0.726315	0.661213
MDBSrug1_08370.1	0.785957	0.109437	0.130869	0.447071	0.645458	0.726341	0.661802
MDBSrug1_11652.1	10.1871	3.12721	7.21604	9.33996	1.24347	0.727112	0.663072
MDBSrug1_12336.1	0.207549	0.123597	0.0928283	0.361127	1.37086	0.728059	0.664503
MDBSrug1_10660.1	0.543879	0.409032	0.485409	0.403264	0.932587	0.730649	0.667436
MDBSrug1_10999.1	16.2522	23.5259	23.0728	20.0166	1.08325	0.731999	0.66924
MDBSrug1_10669.1	0.411746	1.1457	0.681437	1.2418	1.23486	0.732604	0.670364
MDBSrug1_03513.1	1.00138	0.669607	1.41761	0.616177	1.21712	0.733167	0.671451
MDBSrug1_05808.1	0.142876	0.121531	0.0964419	0.222692	1.20698	0.739785	0.678089
MDBSrug1_11704.1	12.4952	13.2157	10.8229	13.6594	0.952217	0.740521	0.67934
MDBSrug1_02865.1	0.140753	0.0968753	0.19045	0.0909305	1.18412	0.741113	0.680461
MDBSrug1_07896.1	9.70866	7.02789	5.18401	9.57551	0.881874	0.744437	0.684093
MDBSrug1_04971.1	3.20327	2.74542	3.2724	2.22323	0.92384	0.745176	0.685353
MDBSrug1_07033.1	0.168445	0.263745	0.137312	0.242068	0.877808	0.745313	0.68606
MDBSrug1_03747.1	3.71482	4.15731	3.22591	4.22056	0.945927	0.747578	0.688727
MDBSrug1_11207.1	2.03849	1.86477	2.11307	1.55552	0.939879	0.747915	0.689621
MDBSrug1_09541.1;MDBSrug1_08361.1	1.52736	1.68964	2.29086	1.32293	1.12334	0.752565	0.694494
MDBSrug1_06457.1	1.32952	1.1132	1.00821	1.73225	1.12189	0.753011	0.695494
MDBSrug1_07722.1	0.215014	0.415737	0.428968	0.290529	1.1407	0.754589	0.697539
MDBSrug1_11820.1	1.29684	0.0866932	0.371898	0.524833	0.648146	0.756635	0.70002
MDBSrug1_03403.1	0.216449	0.559328	0.371935	0.545469	1.18256	0.75828	0.702133
MDBSrug1_07120.1	3.38045	3.62607	2.18131	4.07379	0.892754	0.759511	0.703865
MDBSrug1_01821.1	2.29273	1.20529	1.45674	1.61155	0.877153	0.760587	0.705455
MDBSrug1_06822.1	4.28617	0.617416	4.51233	1.95589	1.31908	0.763307	0.708573
MDBSrug1_01309.1	6.02963	6.25043	7.01446	4.15285	0.909386	0.763945	0.70976
MDBSrug1_02451.1	2.87893	3.40165	2.18452	3.55929	0.914537	0.76616	0.712415
MDBSrug1_10075.1	0.295424	0.0333882	0.0780967	0.149901	0.693396	0.767328	0.714099
MDBSrug1_04374.1	16.9313	14.4519	13.2925	16.6633	0.954517	0.768034	0.715355
MDBSrug1_11831.1	0.174566	0.186255	0.193753	0.174725	1.02122	0.770104	0.717883
MDBSrug1_07124.1	21.9887	18.9101	20.1724	19.5836	0.972057	0.774149	0.722257
MDBSrug1_07549.1	1.13093	1.49027	1.38865	1.07736	0.940796	0.775658	0.72427
MDBSrug1_03966.2	1.62763	1.81679	1.37689	2.46986	1.1168	0.775792	0.725
MDBSrug1_05336.1	1.299	1.28304	1.65303	1.11924	1.07367	0.782067	0.731474
MDBSrug1_00374.1	41.2703	34.2504	53.5377	30.3199	1.11039	0.782154	0.732164
MDBSrug1_12469.1	0.367264	0.289175	0.274679	0.441354	1.09078	0.787371	0.737662
MDBSrug1_08956.1	14.0526	17.8378	16.3654	16.7853	1.03952	0.795521	0.745917
MDBSrug1_04985.1	1.39675	0.803358	0.651404	2.00847	1.20897	0.79687	0.747803
MDBSrug1_09909.1	101.772	130.017	109.835	112.682	0.959995	0.79817	0.749645
MDBSrug1_11832.1	3.44868	2.98264	3.91648	2.86698	1.05475	0.798946	0.750997
MDBSrug1_10321.1;MDBSrug1_02389.1	19.2564	21.2533	24.6244	11.9173	0.902049	0.807631	0.75979
MDBSrug1_06546.1	0.747927	0.78543	0.709953	0.875086	1.03371	0.807683	0.760468
MDBSrug1_01651.1	1.37641	1.1881	1.36602	1.11194	0.966248	0.811894	0.765066
MDBSrug1_00846.1;MDBSrug1_10322.1	1.27713	1.03449	0.857381	1.3106	0.937862	0.813029	0.76677
MDBSrug1_05809.1	4.78167	2.91133	4.47276	2.48737	0.904736	0.813431	0.767782
MDBSrug1_02720.1	0.50241	0.287883	0.312583	0.411109	0.915726	0.81378	0.768746
MDBSrug1_08618.1	0.977848	0.663688	0.627141	0.905169	0.933461	0.819258	0.77456
MDBSrug1_00624.1	0.0653966	0.024531	0.00299978	0.121707	1.38674	0.820933	0.776783
MDBSrug1_02814.1	0.528319	0.245566	0.621556	0.268096	1.14959	0.823052	0.779429
MDBSrug1_12711.1	3.49961	3.00916	2.51755	3.66167	0.949367	0.825786	0.782663
MDBSrug1_08450.1	6.25186	4.13557	3.56375	6.01703	0.922343	0.827057	0.784512
MDBSrug1_12653.1	1.81601	1.02641	1.17724	1.93047	1.09333	0.830631	0.788549
MDBSrug1_11503.1	1.05912	0.764371	0.638236	1.05984	0.931224	0.832453	0.790928
MDBSrug1_06442.1	45.6759	30.5276	36.4793	35.8545	0.949218	0.840794	0.799508
MDBSrug1_07528.1	10.482	10.9226	2.41939	15.6817	0.845664	0.844601	0.803786
MDBSrug1_09024.1	12.2471	11.0467	11.5416	11.4547	0.987228	0.845408	0.805214
MDBSrug1_00562.1	0.777167	0.855208	0.594667	0.949848	0.946176	0.846337	0.806758
MDBSrug1_02460.1	0.312972	0.151799	0.0550801	0.337093	0.843799	0.848473	0.809455
MDBSrug1_08300.1	0.690331	0.206534	0.693161	0.333339	1.14454	0.85114	0.812663
MDBSrug1_01488.1	0.59272	0.506818	0.431261	0.621529	0.957483	0.851201	0.813385
MDBSrug1_10355.1	2.36581	1.16204	1.44757	1.79959	0.920438	0.855587	0.818243
MDBSrug1_01456.1	76.9122	87.3705	88.8412	78.4391	1.01825	0.857764	0.820993
MDBSrug1_11776.1	9.82101	8.76266	9.15486	9.19238	0.987277	0.860091	0.823891
MDBSrug1_12090.1	0.856206	1.00057	0.779413	1.02214	0.970257	0.866565	0.830768
MDBSrug1_06451.1	0.338945	0.264337	0.0514184	0.686641	1.22341	0.867067	0.831925
MDBSrug1_03688.1	3.73644	2.51212	2.33987	4.36408	1.07288	0.868426	0.833906
MDBSrug1_08496.1	25.8694	22.321	21.8016	27.6967	1.02714	0.870094	0.836186
MDBSrug1_04781.1	1.32562	2.50507	2.26086	1.80118	1.0604	0.879358	0.845774
MDBSrug1_03525.1	0.710498	0.576665	0.579206	0.744212	1.02817	0.880791	0.847839
MDBSrug1_07187.1	0.0431027	0.0144223	0.0319995	0.0308469	1.09251	0.883226	0.850871
MDBSrug1_02192.1	0.703232	0.438913	0.745386	0.310176	0.924193	0.883486	0.85181
MDBSrug1_01721.1	17.7823	11.9772	13.6746	17.237	1.03871	0.883995	0.852989
MDBSrug1_07127.1	0.191111	0.0732271	0.128032	0.156724	1.07724	0.891577	0.861001
MDBSrug1_08398.1	4.63635	4.42971	2.1134	7.95135	1.11016	0.892152	0.862251
MDBSrug1_05771.1	7.43319	8.92373	6.50146	9.35212	0.969228	0.893996	0.86473
MDBSrug1_05462.1	0.0781917	0.146192	0.108159	0.127634	1.05085	0.895269	0.866659
MDBSrug1_00695.1	5.87652	12.7137	6.65902	10.7553	0.936747	0.898831	0.870808
MDBSrug1_05966.1	19.8908	23.8816	21.8678	22.525	1.01417	0.902109	0.874687
MDBSrug1_01530.1	2.14089	2.17023	2.92484	1.1048	0.93471	0.902322	0.875597
MDBSrug1_06067.1	0.563444	0.406927	0.0672042	1.05623	1.15774	0.902514	0.876487
MDBSrug1_09442.1	0.333519	0.452538	0.317417	0.444638	0.969465	0.903088	0.877748
MDBSrug1_04497.1	1.32448	1.53153	0.559825	2.06511	0.919091	0.903224	0.878584
MDBSrug1_09589.1	6.14021	5.0675	6.33687	5.08899	1.01946	0.906912	0.882878
MDBSrug1_02262.1	6.17318	7.36027	7.78748	6.02797	1.02084	0.907946	0.884593
MDBSrug1_03397.1	1.28957	0.412112	0.290898	1.25104	0.906127	0.913564	0.890778
MDBSrug1_03135.1	11.8771	12.3153	10.4912	13.3156	0.984062	0.913856	0.891775
MDBSrug1_08783.1	4.20111	3.88281	5.01609	3.27772	1.02596	0.923804	0.902203
MDBSrug1_08764.1	2.43	1.08879	1.16962	2.16878	0.948736	0.924662	0.903761
MDBSrug1_09214.1	15.2793	15.8344	19.4204	12.5084	1.0262	0.925317	0.905123
MDBSrug1_07681.1	0.586411	0.660899	0.307837	1.02133	1.06562	0.92737	0.907854
MDBSrug1_06808.1	9.17346	9.98293	9.73259	9.33874	0.99556	0.936097	0.917127
MDBSrug1_08655.1	234.022	274.656	272.582	231.34	0.990651	0.942015	0.92366
MDBSrug1_02170.1	0.445027	0.374855	0.542109	0.298853	1.02571	0.945604	0.927915
MDBSrug1_09864.1	0.398774	0.049239	0.0716574	0.410582	1.0764	0.950358	0.933321
MDBSrug1_05961.1	0.820444	0.796699	1.20146	0.350051	0.959418	0.95103	0.934723
MDBSrug1_04756.1	1.64954	1.96215	1.23264	2.29609	0.977031	0.951039	0.935473
MDBSrug1_08265.1	0.581945	0.378264	0.301531	0.689438	1.03204	0.952163	0.937321
MDBSrug1_09479.1	0.679733	0.634718	0.963494	0.393708	1.03252	0.952358	0.938254
MDBSrug1_01265.1	4.30815	5.5473	4.21016	5.53335	0.988642	0.9564	0.942982
MDBSrug1_06304.1	3.61771	4.06813	3.71898	3.99988	1.0043	0.957001	0.944321
MDBSrug1_07934.1	2.52123	2.93916	1.27477	4.00738	0.967358	0.958651	0.946695
MDBSrug1_06241.1	1.34405	0.173648	0.801124	0.785931	1.0457	0.962318	0.951068
MDBSrug1_08886.1	1.2346	0.312299	0.801013	0.799392	1.03459	0.963109	0.952599
MDBSrug1_11324.1	0.136627	0.439163	0.185398	0.371826	0.967755	0.963909	0.954143
MDBSrug1_11147.1	1.30708	0.962436	1.32696	0.967728	1.01109	0.964279	0.95526
MDBSrug1_01327.1	0.855568	0.686113	0.767763	0.765133	0.994301	0.967025	0.958734
MDBSrug1_07866.1	0.116276	0.476084	0.386803	0.222226	1.02814	0.971592	0.96402
MDBSrug1_12476.1	0.0538243	0.0661241	0.0436624	0.074928	0.988678	0.973054	0.966228
MDBSrug1_10362.1	2.34802	1.68981	2.24907	1.81922	1.00754	0.973112	0.967044
MDBSrug1_09229.1	9.25463	8.57086	10.9513	6.71964	0.99133	0.976833	0.971504
MDBSrug1_04932.1	8.12753	12.8515	10.8806	10.2607	1.00774	0.978173	0.973599
MDBSrug1_03261.1	1.9199	1.4461	2.19351	1.2062	1.01002	0.979155	0.975339
MDBSrug1_11915.1	12.0702	7.66875	6.52254	13.359	1.00722	0.98784	0.98476
MDBSrug1_12566.1	1.89066	2.54229	2.62795	1.78695	0.995929	0.988092	0.985781
MDBSrug1_08690.1	4.37017	4.21429	3.83844	4.73546	0.99877	0.992536	0.990989
MDBSrug1_06069.1;MDBSrug1_03563.1	1.25633	1.58019	1.46754	1.36846	0.999817	0.998995	0.998216
MDBSrug1_07348.1	2.32186	0.279283	1.44387	1.15913	1.00072	0.999421	0.999421
MDBSrug1_05990.1	0.0021882	0.0132288	NaN	NaN
MDBSrug1_05210.1	0.00324371	0.0106739	NaN	NaN
MDBSrug1_06239.1	0.00476785	0.00611611	NaN	NaN
MDBSrug1_05352.1	0.00665095	0.0621457	NaN	NaN
MDBSrug1_11615.1	0.00702453	0.00475117	NaN	NaN
MDBSrug1_04933.1	0.00733501	0.00797097	NaN	NaN
MDBSrug1_03272.1	0.00757248	0.0103045	NaN	NaN
MDBSrug1_03159.1	0.00804813	0.0100108	NaN	NaN
MDBSrug1_04619.1	0.00816722	0.00307518	NaN	NaN
MDBSrug1_03731.1	0.00835436	0.114371	NaN	NaN
MDBSrug1_05173.1	0.00876976	0.00872851	NaN	NaN
MDBSrug1_11123.1	0.00955058	0.00438793	NaN	NaN
MDBSrug1_03008.1	0.0113025	0.011276	NaN	NaN
MDBSrug1_11227.1	0.0153388	0.00418634	NaN	NaN
MDBSrug1_09093.1	0.0156341	0.0744109	NaN	NaN
MDBSrug1_05356.1	0.0172209	0.0173301	NaN	NaN
MDBSrug1_07954.1	0.0190469	0.0075498	NaN	NaN
MDBSrug1_08709.1	0.0192149	0.0176124	NaN	NaN
MDBSrug1_09780.1	0.0196615	0.0223756	NaN	NaN
MDBSrug1_00552.1	0.0207362	0.0206733	NaN	NaN
MDBSrug1_12503.1	0.0207822	0.0255726	NaN	NaN
MDBSrug1_06906.1	0.0217491	0.0360877	NaN	NaN
MDBSrug1_03835.2	0.0245679	0.0504883	NaN	NaN
MDBSrug1_00967.1	0.0256833	0.184519	NaN	NaN
MDBSrug1_05153.1	0.0265457	0.0284326	NaN	NaN
MDBSrug1_11620.1	0.0265797	0.0861639	NaN	NaN
MDBSrug1_11550.1	0.0299766	0.239835	NaN	NaN
MDBSrug1_09088.1	0.0305898	0.0310006	NaN	NaN
MDBSrug1_04875.1	0.0318842	0.100689	NaN	NaN
MDBSrug1_10919.1	0.0319395	0.00770404	NaN	NaN
MDBSrug1_03355.1	0.0325817	0.0212573	NaN	NaN
MDBSrug1_00261.1	0.0327316	0.0258913	NaN	NaN
MDBSrug1_05105.1	0.0335886	0.0433631	NaN	NaN
MDBSrug1_06286.1	0.0355781	0.212214	NaN	NaN
MDBSrug1_11303.1	0.0375629	0.177769	NaN	NaN
MDBSrug1_07908.1	0.0385305	0.0276295	NaN	NaN
MDBSrug1_07098.1	0.0391189	0.0225282	NaN	NaN
MDBSrug1_00749.1	0.0396257	0.0471332	NaN	NaN
MDBSrug1_04144.1	0.0422131	0.254001	NaN	NaN
MDBSrug1_02299.1	0.0427306	0.0432015	NaN	NaN
MDBSrug1_12467.1	0.0435741	0.0564843	NaN	NaN
MDBSrug1_06092.1	0.0455731	0.0883779	NaN	NaN
MDBSrug1_02255.1	0.0469802	0.229141	NaN	NaN
MDBSrug1_06151.1	0.048802	0.0482385	NaN	NaN
MDBSrug1_02969.1	0.0493691	0.147763	NaN	NaN
MDBSrug1_07156.1	0.0496456	0.0129977	NaN	NaN
MDBSrug1_06605.1	0.0505139	0.222783	NaN	NaN
MDBSrug1_01857.1	0.0512937	0.0263523	NaN	NaN
MDBSrug1_06717.1	0.0512937	0.0187217	NaN	NaN
MDBSrug1_04546.1	0.0513823	0.088395	NaN	NaN
MDBSrug1_00877.1	0.0520664	0.40387	NaN	NaN
MDBSrug1_01647.1	0.0528461	0.0429209	NaN	NaN
MDBSrug1_09152.1;MDBSrug1_06313.1	0.0551499	0.0976835	NaN	NaN
MDBSrug1_10162.1	0.055632	0.0799715	NaN	NaN
MDBSrug1_12378.1	0.0571631	0.0584633	NaN	NaN
MDBSrug1_01845.1	0.0572198	0.0272806	NaN	NaN
MDBSrug1_00381.1	0.0589034	0.292356	NaN	NaN
MDBSrug1_01691.1	0.059669	0.111269	NaN	NaN
MDBSrug1_06326.1	0.060509	0.035152	NaN	NaN
MDBSrug1_05439.1;MDBSrug1_01978.2	0.0611186	0.123717	NaN	NaN
MDBSrug1_10833.1	0.0646133	0.127547	NaN	NaN
MDBSrug1_03880.1	0.0659708	0.0450159	NaN	NaN
MDBSrug1_00603.1	0.067424	0.037527	NaN	NaN
MDBSrug1_06936.1	0.0681399	0.00831873	NaN	NaN
MDBSrug1_01964.1	0.0692848	0.162903	NaN	NaN
MDBSrug1_08748.1	0.0693273	0.0697439	NaN	NaN
MDBSrug1_08731.1	0.0694655	0.0493073	NaN	NaN
MDBSrug1_06638.1	0.0717374	0.194331	NaN	NaN
MDBSrug1_03989.1	0.074144	0.0401571	NaN	NaN
MDBSrug1_00649.1	0.0756929	0.0735174	NaN	NaN
MDBSrug1_06935.1	0.0798292	0.0524678	NaN	NaN
MDBSrug1_01403.1	0.0799213	0.131332	NaN	NaN
MDBSrug1_09466.1	0.0802687	0.197803	NaN	NaN
MDBSrug1_11082.1	0.0821188	0.122806	NaN	NaN
MDBSrug1_05475.1	0.0827568	0.0718668	NaN	NaN
MDBSrug1_10115.1	0.0838378	0.24576	NaN	NaN
MDBSrug1_04107.1	0.0856348	0.0821798	NaN	NaN
MDBSrug1_00392.1	0.0864713	0.15687	NaN	NaN
MDBSrug1_11134.1	0.0864996	0.0759419	NaN	NaN
MDBSrug1_12701.1	0.0896328	0.119203	NaN	NaN
MDBSrug1_03889.1	0.0927766	0.0919522	NaN	NaN
MDBSrug1_04478.1	0.0948926	0.0804952	NaN	NaN
MDBSrug1_00315.1	0.0970405	0.11745	NaN	NaN
MDBSrug1_06130.1	0.0973595	0.243295	NaN	NaN
MDBSrug1_00194.1	0.1038	0.0959135	NaN	NaN
MDBSrug1_07907.1	0.103927	0.135874	NaN	NaN
MDBSrug1_11496.1	0.110477	0.346323	NaN	NaN
MDBSrug1_03325.1;MDBSrug1_04773.1	0.112781	0.0495413	NaN	NaN
MDBSrug1_06714.1	0.115914	0.122567	NaN	NaN
MDBSrug1_11539.1	0.118136	0.517923	NaN	NaN
MDBSrug1_07265.1	0.122131	0.0694195	NaN	NaN
MDBSrug1_10380.1	0.122411	0.0818497	NaN	NaN
MDBSrug1_06123.1	0.123304	0.249414	NaN	NaN
MDBSrug1_12488.1	0.124977	0.182721	NaN	NaN
MDBSrug1_09714.1	0.125019	0.263762	NaN	NaN
MDBSrug1_07026.1	0.128029	0.0800968	NaN	NaN
MDBSrug1_12472.1	0.12856	0.105544	NaN	NaN
MDBSrug1_04590.1	0.130722	0.0917302	NaN	NaN
MDBSrug1_04973.1	0.130775	0.0826352	NaN	NaN
MDBSrug1_04327.1	0.131711	0.0821002	NaN	NaN
MDBSrug1_06176.1	0.132179	0.115976	NaN	NaN
MDBSrug1_07574.1	0.133696	0.248674	NaN	NaN
MDBSrug1_12301.1	0.133778	0.405509	NaN	NaN
MDBSrug1_12189.1	0.136252	0.230581	NaN	NaN
MDBSrug1_00067.1	0.136897	0.113751	NaN	NaN
MDBSrug1_00285.1	0.140427	0.294878	NaN	NaN
MDBSrug1_06188.1	0.140466	0.0752191	NaN	NaN
MDBSrug1_04047.1;MDBSrug1_09924.1	0.14071	0.0899886	NaN	NaN
MDBSrug1_12008.2	0.141855	0.114422	NaN	NaN
MDBSrug1_03707.1	0.142238	0.368156	NaN	NaN
MDBSrug1_01521.1	0.142996	0.158384	NaN	NaN
MDBSrug1_08846.1	0.144272	0.104991	NaN	NaN
MDBSrug1_03032.1	0.144744	0.158082	NaN	NaN
MDBSrug1_09002.1	0.145463	0.130524	NaN	NaN
MDBSrug1_09269.1	0.145906	0.00905122	NaN	NaN
MDBSrug1_08167.1	0.147427	0.0180882	NaN	NaN
MDBSrug1_06357.1	0.147618	0.0779511	NaN	NaN
MDBSrug1_00267.1	0.149908	0.130341	NaN	NaN
MDBSrug1_09439.1	0.153938	0.201998	NaN	NaN
MDBSrug1_01931.1	0.154331	0.0883893	NaN	NaN
MDBSrug1_06625.1	0.15487	0.181013	NaN	NaN
MDBSrug1_10099.1	0.155607	0.150142	NaN	NaN
MDBSrug1_08550.1	0.155919	0.211252	NaN	NaN
MDBSrug1_05587.1	0.156103	0.39333	NaN	NaN
MDBSrug1_09157.1	0.156468	0.607342	NaN	NaN
MDBSrug1_09266.1	0.161034	0.03742	NaN	NaN
MDBSrug1_01731.1	0.161462	0.192891	NaN	NaN
MDBSrug1_11256.1	0.164557	0.056395	NaN	NaN
MDBSrug1_04135.1	0.164642	0.151571	NaN	NaN
MDBSrug1_05598.1	0.165524	0.257923	NaN	NaN
MDBSrug1_04718.1	0.166921	0.130364	NaN	NaN
MDBSrug1_04520.1	0.170391	0.206101	NaN	NaN
MDBSrug1_08593.1	0.170508	0.254872	NaN	NaN
MDBSrug1_11800.1	0.171117	0.618213	NaN	NaN
MDBSrug1_07084.1	0.171383	0.321873	NaN	NaN
MDBSrug1_00210.1	0.1734	0.222379	NaN	NaN
MDBSrug1_01494.1	0.173623	0.117604	NaN	NaN
MDBSrug1_09661.1	0.173885	0.143136	NaN	NaN
MDBSrug1_07800.1	0.174172	0.285549	NaN	NaN
MDBSrug1_08749.1	0.176526	0.142442	NaN	NaN
MDBSrug1_04567.1	0.177462	0.128173	NaN	NaN
MDBSrug1_04506.1	0.179025	1.01725	NaN	NaN
MDBSrug1_06491.1	0.179067	0.150643	NaN	NaN
MDBSrug1_00003.1	0.180283	0.3593	NaN	NaN
MDBSrug1_00771.1	0.182087	0.267923	NaN	NaN
MDBSrug1_12414.1	0.18489	0.335578	NaN	NaN
MDBSrug1_01801.1	0.186106	0.160194	NaN	NaN
MDBSrug1_02343.1	0.18707	0.311616	NaN	NaN
MDBSrug1_00777.1	0.187315	0.143392	NaN	NaN
MDBSrug1_10655.1	0.187811	0.131998	NaN	NaN
MDBSrug1_09521.1	0.187971	0.063967	NaN	NaN
MDBSrug1_03944.1	0.188754	0.0804667	NaN	NaN
MDBSrug1_09781.1	0.190668	0.209454	NaN	NaN
MDBSrug1_05510.1	0.191774	0.307325	NaN	NaN
MDBSrug1_04884.1	0.194368	0.100979	NaN	NaN
MDBSrug1_09952.1	0.194606	1.16858	NaN	NaN
MDBSrug1_00188.1	0.195906	0.0626124	NaN	NaN
MDBSrug1_12513.2	0.196569	0.141907	NaN	NaN
MDBSrug1_05868.1	0.198915	0.470558	NaN	NaN
MDBSrug1_12193.1	0.200159	0.223904	NaN	NaN
MDBSrug1_09796.1	0.205068	0.301742	NaN	NaN
MDBSrug1_10207.1	0.205068	0.126688	NaN	NaN
MDBSrug1_04628.1	0.206947	0.226807	NaN	NaN
MDBSrug1_01718.1;MDBSrug1_04477.1	0.209049	0.156101	NaN	NaN
MDBSrug1_03243.1	0.212958	0.347388	NaN	NaN
MDBSrug1_07273.1	0.213111	0.719237	NaN	NaN
MDBSrug1_12013.1	0.213617	0.29757	NaN	NaN
MDBSrug1_06881.1	0.214057	0.472123	NaN	NaN
MDBSrug1_09558.1	0.214936	0.133216	NaN	NaN
MDBSrug1_00670.1	0.216173	0.198224	NaN	NaN
MDBSrug1_02860.1	0.217449	0.487416	NaN	NaN
MDBSrug1_00929.1	0.219742	0.12033	NaN	NaN
MDBSrug1_12544.1	0.220554	0.0746955	NaN	NaN
MDBSrug1_08484.1	0.223389	0.0543227	NaN	NaN
MDBSrug1_11026.1	0.226583	0.209624	NaN	NaN
MDBSrug1_01616.1	0.227557	0.06893	NaN	NaN
MDBSrug1_09502.1	0.230772	0.292783	NaN	NaN
MDBSrug1_10432.1	0.231034	0.279032	NaN	NaN
MDBSrug1_11991.1	0.233324	0.326124	NaN	NaN
MDBSrug1_10672.1	0.237127	0.317712	NaN	NaN
MDBSrug1_01358.1	0.238938	0.30889	NaN	NaN
MDBSrug1_09614.1	0.240172	0.121468	NaN	NaN
MDBSrug1_06054.1	0.243315	0.175225	NaN	NaN
MDBSrug1_00262.2	0.2453	0.409533	NaN	NaN
MDBSrug1_09455.1	0.246091	0.283574	NaN	NaN
MDBSrug1_03052.1	0.247016	0.228384	NaN	NaN
MDBSrug1_05239.1	0.250911	0.116966	NaN	NaN
MDBSrug1_11909.1	0.252063	0.182703	NaN	NaN
MDBSrug1_05590.1	0.254994	0.0744223	NaN	NaN
MDBSrug1_08190.1	0.255639	0.070222	NaN	NaN
MDBSrug1_11410.1	0.256631	0.570916	NaN	NaN
MDBSrug1_01031.1	0.258007	0.212954	NaN	NaN
MDBSrug1_02168.1	0.266378	0.244792	NaN	NaN
MDBSrug1_02959.1	0.27155	0.0453779	NaN	NaN
MDBSrug1_06818.1	0.272312	0.89095	NaN	NaN
MDBSrug1_05140.1	0.272521	0.161639	NaN	NaN
MDBSrug1_11404.1	0.276469	0.322726	NaN	NaN
MDBSrug1_10343.1	0.28069	0.355327	NaN	NaN
MDBSrug1_12326.1	0.283519	0.185327	NaN	NaN
MDBSrug1_08324.1	0.283568	0.0554752	NaN	NaN
MDBSrug1_00737.1;MDBSrug1_09118.1	0.286042	0.136249	NaN	NaN
MDBSrug1_06759.1	0.286237	0.298048	NaN	NaN
MDBSrug1_10852.1	0.286585	0.38029	NaN	NaN
MDBSrug1_01319.1	0.28897	0.544223	NaN	NaN
MDBSrug1_08990.1	0.289909	0.231155	NaN	NaN
MDBSrug1_06837.1	0.290632	0.852647	NaN	NaN
MDBSrug1_06117.1	0.293847	0.066716	NaN	NaN
MDBSrug1_07944.1	0.295658	0.328833	NaN	NaN
MDBSrug1_02127.1;MDBSrug1_01340.1	0.298972	0.110888	NaN	NaN
MDBSrug1_01803.1	0.303225	0.38547	NaN	NaN
MDBSrug1_12385.2	0.304235	0.233574	NaN	NaN
MDBSrug1_01724.1	0.305153	0.414667	NaN	NaN
MDBSrug1_09324.1	0.305823	0.482584	NaN	NaN
MDBSrug1_10721.1	0.306011	0.0764826	NaN	NaN
MDBSrug1_03262.1	0.306965	0.148902	NaN	NaN
MDBSrug1_04091.1	0.307113	0.376488	NaN	NaN
MDBSrug1_06484.1	0.308971	0.10185	NaN	NaN
MDBSrug1_10938.1	0.309035	0.185139	NaN	NaN
MDBSrug1_11407.1	0.313298	0.528913	NaN	NaN
MDBSrug1_11047.1;MDBSrug1_06774.1	0.313982	0.733694	NaN	NaN
MDBSrug1_01711.1	0.316215	0.249915	NaN	NaN
MDBSrug1_12314.1	0.316499	0.367905	NaN	NaN
MDBSrug1_04890.1	0.316903	0.302561	NaN	NaN
MDBSrug1_07468.1	0.319168	0.279516	NaN	NaN
MDBSrug1_05408.1	0.322967	0.16284	NaN	NaN
MDBSrug1_01390.1	0.326242	0.340302	NaN	NaN
MDBSrug1_07964.1	0.327901	0.677348	NaN	NaN
MDBSrug1_01259.1	0.330159	0.479505	NaN	NaN
MDBSrug1_04373.1	0.331176	0.515151	NaN	NaN
MDBSrug1_00640.1	0.336666	0.662379	NaN	NaN
MDBSrug1_06563.1	0.339388	0.532265	NaN	NaN
MDBSrug1_09626.1	0.342054	0.0241286	NaN	NaN
MDBSrug1_08038.1	0.342631	0.0126016	NaN	NaN
MDBSrug1_05969.1	0.348855	0.452362	NaN	NaN
MDBSrug1_05227.1	0.349334	0.893625	NaN	NaN
MDBSrug1_08553.1	0.359254	0.0688105	NaN	NaN
MDBSrug1_06300.1	0.36092	0.0541235	NaN	NaN
MDBSrug1_08292.1	0.362728	0.45107	NaN	NaN
MDBSrug1_01739.1	0.365457	0.0535999	NaN	NaN
MDBSrug1_08029.1	0.365705	0.430598	NaN	NaN
MDBSrug1_11427.1	0.368151	0.145612	NaN	NaN
MDBSrug1_03796.1	0.372616	0.491429	NaN	NaN
MDBSrug1_03674.1	0.372723	0.476557	NaN	NaN
MDBSrug1_12146.1	0.377649	0.35243	NaN	NaN
MDBSrug1_07548.1	0.378961	0.0756289	NaN	NaN
MDBSrug1_01413.1	0.382682	0.329943	NaN	NaN
MDBSrug1_12074.1	0.395867	0.585202	NaN	NaN
MDBSrug1_10562.1	0.397569	0.0851508	NaN	NaN
MDBSrug1_10470.1	0.39888	0.235606	NaN	NaN
MDBSrug1_07600.1	0.40168	0.751224	NaN	NaN
MDBSrug1_08587.1	0.406146	0.370484	NaN	NaN
MDBSrug1_12039.1	0.410364	0.684804	NaN	NaN
MDBSrug1_04554.1	0.410647	0.195731	NaN	NaN
MDBSrug1_08805.1	0.421103	0.0901366	NaN	NaN
MDBSrug1_04322.1	0.423301	0.172339	NaN	NaN
MDBSrug1_02785.1	0.423797	0.315424	NaN	NaN
MDBSrug1_01240.1	0.424966	0.151451	NaN	NaN
MDBSrug1_07739.1	0.429751	0.392624	NaN	NaN
MDBSrug1_02011.1	0.433544	0.547274	NaN	NaN
MDBSrug1_09846.1	0.436485	0.443739	NaN	NaN
MDBSrug1_03161.1	0.44003	0.116283	NaN	NaN
MDBSrug1_00047.1	0.445169	0.703699	NaN	NaN
MDBSrug1_08085.1	0.446835	0.225293	NaN	NaN
MDBSrug1_11211.1	0.448111	0.380962	NaN	NaN
MDBSrug1_12282.1	0.457716	0.221981	NaN	NaN
MDBSrug1_08657.1	0.459276	0.400017	NaN	NaN
MDBSrug1_00442.1	0.462855	0.742174	NaN	NaN
MDBSrug1_10841.1	0.463706	0.491816	NaN	NaN
MDBSrug1_10810.1	0.469483	0.293597	NaN	NaN
MDBSrug1_01645.1	0.473382	0.757712	NaN	NaN
MDBSrug1_12033.1	0.48118	0.770802	NaN	NaN
MDBSrug1_01902.1	0.483448	0.290581	NaN	NaN
MDBSrug1_01123.1	0.491742	2.45862	NaN	NaN
MDBSrug1_06158.1;MDBSrug1_01439.1	0.493124	0.480933	NaN	NaN
MDBSrug1_01674.1	0.494542	0.373352	NaN	NaN
MDBSrug1_01850.1	0.520805	0.238349	NaN	NaN
MDBSrug1_03295.1	0.522648	0.12868	NaN	NaN
MDBSrug1_01848.1	0.530588	0.483791	NaN	NaN
MDBSrug1_10499.1	0.53477	0.250837	NaN	NaN
MDBSrug1_10408.1	0.534876	0.379664	NaN	NaN
MDBSrug1_10307.1	0.535833	0.645077	NaN	NaN
MDBSrug1_00935.1	0.549089	0.421121	NaN	NaN
MDBSrug1_05344.1	0.550223	0.431696	NaN	NaN
MDBSrug1_03553.1	0.555327	0.277655	NaN	NaN
MDBSrug1_08884.1	0.557206	0.195487	NaN	NaN
MDBSrug1_12156.1	0.560821	1.72669	NaN	NaN
MDBSrug1_09853.1	0.565074	0.864371	NaN	NaN
MDBSrug1_12608.1	0.567023	0.334212	NaN	NaN
MDBSrug1_05350.1	0.578472	0.396682	NaN	NaN
MDBSrug1_06418.1	0.580386	0.0523973	NaN	NaN
MDBSrug1_10642.1	0.581449	0.445788	NaN	NaN
MDBSrug1_11258.1	0.583186	0.858054	NaN	NaN
MDBSrug1_06181.1	0.586305	0.51436	NaN	NaN
MDBSrug1_11196.1	0.602644	0.453705	NaN	NaN
MDBSrug1_05129.1;MDBSrug1_06823.1;MDBSrug1_04419.1;MDBSrug1_02883.1	0.603176	0.516636	NaN	NaN
MDBSrug1_11526.1	0.607216	0.296699	NaN	NaN
MDBSrug1_04689.1	0.608315	0.734604	NaN	NaN
MDBSrug1_09519.1	0.608528	0.839215	NaN	NaN
MDBSrug1_04139.1	0.609024	0.739841	NaN	NaN
MDBSrug1_00236.1	0.60991	0.437587	NaN	NaN
MDBSrug1_08994.1	0.610264	0.21955	NaN	NaN
MDBSrug1_02582.1	0.611292	0.719977	NaN	NaN
MDBSrug1_08382.1;MDBSrug1_03745.1	0.612214	0.485595	NaN	NaN
MDBSrug1_02283.1	0.612852	0.684519	NaN	NaN
MDBSrug1_04120.1	0.625399	0.580193	NaN	NaN
MDBSrug1_05267.1	0.625434	0.582299	NaN	NaN
MDBSrug1_04592.1	0.626037	0.756517	NaN	NaN
MDBSrug1_05892.1	0.633444	1.10831	NaN	NaN
MDBSrug1_07536.1	0.634437	0.571941	NaN	NaN
MDBSrug1_03551.1	0.638265	0.624417	NaN	NaN
MDBSrug1_08758.1	0.647338	0.385595	NaN	NaN
MDBSrug1_12016.3	0.653151	0.321036	NaN	NaN
MDBSrug1_11760.1	0.659743	0.861582	NaN	NaN
MDBSrug1_09166.2	0.668711	0.459852	NaN	NaN
MDBSrug1_02455.1	0.671936	0.481639	NaN	NaN
MDBSrug1_09342.1	0.675055	0.893625	NaN	NaN
MDBSrug1_12070.2	0.675232	0.724473	NaN	NaN
MDBSrug1_03360.1	0.680265	1.30438	NaN	NaN
MDBSrug1_09644.1	0.680371	0.299937	NaN	NaN
MDBSrug1_05286.1	0.698554	0.981047	NaN	NaN
MDBSrug1_11711.1	0.699511	0.293939	NaN	NaN
MDBSrug1_05800.1	0.69983	0.434166	NaN	NaN
MDBSrug1_01144.1	0.699936	0.449277	NaN	NaN
MDBSrug1_02973.1	0.700007	0.789471	NaN	NaN
MDBSrug1_04730.1	0.701815	0.461013	NaN	NaN
MDBSrug1_02503.1	0.704154	0.434957	NaN	NaN
MDBSrug1_00263.1	0.707379	1.16949	NaN	NaN
MDBSrug1_01310.1	0.707521	0.0840922	NaN	NaN
MDBSrug1_10246.1	0.709116	1.09323	NaN	NaN
MDBSrug1_04462.1	0.709187	0.885487	NaN	NaN
MDBSrug1_06618.1	0.713936	0.998463	NaN	NaN
MDBSrug1_04483.1	0.716984	0.584348	NaN	NaN
MDBSrug1_12051.1	0.720033	0.639215	NaN	NaN
MDBSrug1_02714.1	0.720068	0.837507	NaN	NaN
MDBSrug1_02929.1	0.742752	0.0981901	NaN	NaN
MDBSrug1_11680.1	0.742929	0.44473	NaN	NaN
MDBSrug1_04844.1	0.743815	0.670689	NaN	NaN
MDBSrug1_08233.1	0.750018	0.870518	NaN	NaN
MDBSrug1_03038.1	0.755157	0.695959	NaN	NaN
MDBSrug1_06580.4;MDBSrug1_05152.1	0.756291	0.625384	NaN	NaN
MDBSrug1_11825.1	0.756681	0.64115	NaN	NaN
MDBSrug1_12751.1	0.757425	0.672055	NaN	NaN
MDBSrug1_12396.1	0.75863	0.167382	NaN	NaN
MDBSrug1_06088.1	0.764868	0.968014	NaN	NaN
MDBSrug1_10927.2	0.765507	0.447797	NaN	NaN
MDBSrug1_05568.1	0.768555	1.10267	NaN	NaN
MDBSrug1_10154.1	0.76976	0.786625	NaN	NaN
MDBSrug1_00861.1	0.780747	1.29829	NaN	NaN
MDBSrug1_02442.1	0.78174	0.491707	NaN	NaN
MDBSrug1_10952.1	0.791132	0.590097	NaN	NaN
MDBSrug1_06271.1	0.793649	2.014	NaN	NaN
MDBSrug1_11882.1	0.803254	0.676608	NaN	NaN
MDBSrug1_02831.1	0.807117	0.809448	NaN	NaN
MDBSrug1_02777.1	0.814808	0.195481	NaN	NaN
MDBSrug1_11765.1	0.820904	1.16944	NaN	NaN
MDBSrug1_01795.1	0.857801	2.73079	NaN	NaN
MDBSrug1_09720.1	0.859786	0.571201	NaN	NaN
MDBSrug1_07825.1	0.865811	0.702504	NaN	NaN
MDBSrug1_01022.1	0.87407	1.05925	NaN	NaN
MDBSrug1_01649.1	0.880308	0.475014	NaN	NaN
MDBSrug1_03698.1	0.883285	0.80239	NaN	NaN
MDBSrug1_06963.1	0.914936	0.193016	NaN	NaN
MDBSrug1_01878.1	0.918303	1.11941	NaN	NaN
MDBSrug1_04240.1	0.924222	0.639556	NaN	NaN
MDBSrug1_05549.1	0.926207	1.47291	NaN	NaN
MDBSrug1_01167.2;MDBSrug1_07281.1	0.935032	1.08873	NaN	NaN
MDBSrug1_11249.1	0.956369	1.70933	NaN	NaN
MDBSrug1_03192.1	0.958141	1.3868	NaN	NaN
MDBSrug1_01228.1	0.958248	0.804382	NaN	NaN
MDBSrug1_12655.1	0.962253	1.15913	NaN	NaN
MDBSrug1_03570.2	0.97838	0.911781	NaN	NaN
MDBSrug1_06106.1	0.986425	0.784405	NaN	NaN
MDBSrug1_07312.1	1.00574	0.982413	NaN	NaN
MDBSrug1_06174.1	1.0095	0.872055	NaN	NaN
MDBSrug1_10980.1	1.01127	0.231622	NaN	NaN
MDBSrug1_12446.1	1.03257	0.5672	NaN	NaN
MDBSrug1_10011.1	1.05944	0.276534	NaN	NaN
MDBSrug1_08131.1	1.06327	1.1856	NaN	NaN
MDBSrug1_02555.1	1.10668	1.41998	NaN	NaN
MDBSrug1_09921.1	1.108	1.24843	NaN	NaN
MDBSrug1_05632.1	1.12008	1.05242	NaN	NaN
MDBSrug1_07384.1	1.12125	1.08884	NaN	NaN
MDBSrug1_10883.1	1.13582	2.0243	NaN	NaN
MDBSrug1_10600.2	1.13901	0.937962	NaN	NaN
MDBSrug1_12120.1	1.14372	0.513546	NaN	NaN
MDBSrug1_12373.1	1.15595	1.06562	NaN	NaN
MDBSrug1_06914.1	1.17222	0.550911	NaN	NaN
MDBSrug1_00747.1	1.18317	0.299698	NaN	NaN
MDBSrug1_06068.1	1.19997	1.73415	NaN	NaN
MDBSrug1_05307.1	1.20118	1.07706	NaN	NaN
MDBSrug1_06165.1	1.21748	0.764257	NaN	NaN
MDBSrug1_03820.1	1.23205	1.24667	NaN	NaN
MDBSrug1_12644.1	1.23315	1.21873	NaN	NaN
MDBSrug1_08358.1	1.24495	0.330746	NaN	NaN
MDBSrug1_08434.1;MDBSrug1_07538.1	1.24842	0.7572	NaN	NaN
MDBSrug1_11575.1	1.25565	1.49693	NaN	NaN
MDBSrug1_04142.1	1.26894	1.08275	NaN	NaN
MDBSrug1_05953.1	1.2894	2.08441	NaN	NaN
MDBSrug1_04412.1	1.34047	1.44081	NaN	NaN
MDBSrug1_10939.1	1.35642	1.35606	NaN	NaN
MDBSrug1_03616.1	1.36099	1.1078	NaN	NaN
MDBSrug1_08636.1	1.36106	2.2683	NaN	NaN
MDBSrug1_09334.1	1.37223	1.09391	NaN	NaN
MDBSrug1_11721.1	1.41628	1.64479	NaN	NaN
MDBSrug1_05315.1;MDBSrug1_08642.1	1.44049	0.768241	NaN	NaN
MDBSrug1_05503.1	1.44694	3.14405	NaN	NaN
MDBSrug1_05037.1	1.47111	1.54064	NaN	NaN
MDBSrug1_06050.1	1.4715	1.03358	NaN	NaN
MDBSrug1_03550.1	1.50365	0.221241	NaN	NaN
MDBSrug1_08703.1	1.63667	1.89704	NaN	NaN
MDBSrug1_06994.1	1.67495	1.51981	NaN	NaN
MDBSrug1_10265.1	1.67949	1.09249	NaN	NaN
MDBSrug1_09496.1	1.6926	2.63717	NaN	NaN
MDBSrug1_01678.1	1.7391	0.541093	NaN	NaN
MDBSrug1_00585.1	1.75576	1.76113	NaN	NaN
MDBSrug1_02286.1	1.80127	1.12493	NaN	NaN
MDBSrug1_10863.1;MDBSrug1_01320.1	1.82399	1.74434	NaN	NaN
MDBSrug1_09418.1	1.88268	3.40017	NaN	NaN
MDBSrug1_04389.2	1.90618	1.74935	NaN	NaN
MDBSrug1_12098.1	1.91827	10.7832	NaN	NaN
MDBSrug1_10263.1	1.95747	0.955322	NaN	NaN
MDBSrug1_11685.1	2.00773	2.00085	NaN	NaN
MDBSrug1_05529.1	2.03257	2.32607	NaN	NaN
MDBSrug1_10147.1	2.03371	2.93865	NaN	NaN
MDBSrug1_01141.1	2.04012	2.2609	NaN	NaN
MDBSrug1_01907.1	2.04324	1.32686	NaN	NaN
MDBSrug1_06373.1	2.14036	2.08059	NaN	NaN
MDBSrug1_02419.1	2.1847	1.72686	NaN	NaN
MDBSrug1_09273.1	2.19862	1.32516	NaN	NaN
MDBSrug1_08106.1	2.27486	2.05168	NaN	NaN
MDBSrug1_09116.1	2.31506	1.72954	NaN	NaN
MDBSrug1_00318.1	2.37024	2.34861	NaN	NaN
MDBSrug1_08582.1	2.43415	2.53221	NaN	NaN
MDBSrug1_06499.1	2.44368	4.07029	NaN	NaN
MDBSrug1_11959.1	2.50854	4.15544	NaN	NaN
MDBSrug1_08302.1	2.53073	2.74969	NaN	NaN
MDBSrug1_06163.1	2.61416	2.65168	NaN	NaN
MDBSrug1_12591.1	2.67084	2.06187	NaN	NaN
MDBSrug1_04340.1	2.71791	3.81548	NaN	NaN
MDBSrug1_02862.1	2.79106	3.65316	NaN	NaN
MDBSrug1_01454.1	2.91848	1.82686	NaN	NaN
MDBSrug1_03817.1	3.00535	1.94069	NaN	NaN
MDBSrug1_10792.1	3.02364	1.66283	NaN	NaN
MDBSrug1_11803.1	3.02665	2.92186	NaN	NaN
MDBSrug1_07287.1	3.06841	4.0868	NaN	NaN
MDBSrug1_12097.1;MDBSrug1_10442.1	3.26349	2.51924	NaN	NaN
MDBSrug1_05086.1	3.31814	2.10575	NaN	NaN
MDBSrug1_06160.1	3.33785	1.98423	NaN	NaN
MDBSrug1_01421.1	3.34905	3.27114	NaN	NaN
MDBSrug1_09748.1	3.35808	0.885999	NaN	NaN
MDBSrug1_08348.1	3.54505	3.88566	NaN	NaN
MDBSrug1_04539.1	3.7127	3.51201	NaN	NaN
MDBSrug1_09659.1	3.86617	5.28105	NaN	NaN
MDBSrug1_02657.1	3.9367	2.33455	NaN	NaN
MDBSrug1_05760.1	3.93989	5.89641	NaN	NaN
MDBSrug1_05108.1	3.98632	3.0346	NaN	NaN
MDBSrug1_06342.1	4.0012	3.11781	NaN	NaN
MDBSrug1_00677.1	4.08024	3.9066	NaN	NaN
MDBSrug1_02798.1	4.59169	5.14878	NaN	NaN
MDBSrug1_12284.1;MDBSrug1_07133.1	4.67144	4.69015	NaN	NaN
MDBSrug1_00443.1	4.79124	5.06153	NaN	NaN
MDBSrug1_04209.1;MDBSrug1_05924.1	4.84795	5.66278	NaN	NaN
MDBSrug1_02534.1	4.92025	5.49624	NaN	NaN
MDBSrug1_11734.1	4.96066	3.87684	NaN	NaN
MDBSrug1_09323.1	4.99823	5.3617	NaN	NaN
MDBSrug1_11295.1	4.99894	4.04673	NaN	NaN
MDBSrug1_06230.1	5.03934	4.08389	NaN	NaN
MDBSrug1_10609.1	5.11874	5.78429	NaN	NaN
MDBSrug1_09618.1	5.2917	5.03307	NaN	NaN
MDBSrug1_07516.1	5.33742	3.8642	NaN	NaN
MDBSrug1_00354.1	5.62203	10.0734	NaN	NaN
MDBSrug1_06870.1	5.85525	5.74331	NaN	NaN
MDBSrug1_11941.1	6.00659	8.25498	NaN	NaN
MDBSrug1_07629.1	6.79414	6.31246	NaN	NaN
MDBSrug1_02186.1	6.93875	13.1394	NaN	NaN
MDBSrug1_06441.1	7.00822	4.70228	NaN	NaN
MDBSrug1_01224.1;MDBSrug1_07157.1	7.38995	10.0256	NaN	NaN
MDBSrug1_09798.1	8.37279	7.49345	NaN	NaN
MDBSrug1_09203.1	8.57624	7.77462	NaN	NaN
MDBSrug1_01707.1	8.69001	8.00342	NaN	NaN
MDBSrug1_06819.1	8.94698	6.0757	NaN	NaN
MDBSrug1_06859.1	9.65655	44.1884	NaN	NaN
MDBSrug1_08246.1	9.66506	10.6175	NaN	NaN
MDBSrug1_06918.1	9.9798	9.20546	NaN	NaN
MDBSrug1_05271.1	10.0262	7.26636	NaN	NaN
MDBSrug1_02803.1	11.5081	12.794	NaN	NaN
MDBSrug1_11262.1	12.296	12.4098	NaN	NaN
MDBSrug1_02507.1	12.4378	14.2373	NaN	NaN
MDBSrug1_04846.1;MDBSrug1_11859.1	12.5101	14.1605	NaN	NaN
MDBSrug1_07244.1	12.5704	17.3887	NaN	NaN
MDBSrug1_11063.1	12.6983	9.91747	NaN	NaN
MDBSrug1_11441.1	12.7635	13.1559	NaN	NaN
MDBSrug1_04243.1	13.2257	18.4633	NaN	NaN
MDBSrug1_02482.1	14.2833	14.214	NaN	NaN
MDBSrug1_10190.1	15.4133	0.0616335	NaN	NaN
MDBSrug1_04089.1	18.3919	10.6067	NaN	NaN
MDBSrug1_04677.1	19.3677	17.247	NaN	NaN
MDBSrug1_07012.1	19.3812	14.7837	NaN	NaN
MDBSrug1_05886.1	21.22	13.4172	NaN	NaN
MDBSrug1_04262.1	22.5838	13.2578	NaN	NaN
MDBSrug1_06318.1	22.5856	49.9345	NaN	NaN
MDBSrug1_06071.1	22.6132	22.7957	NaN	NaN
MDBSrug1_07408.1	22.7065	23.2077	NaN	NaN
MDBSrug1_03453.1	22.9489	21.8429	NaN	NaN
MDBSrug1_03584.1	23.7109	13.5077	NaN	NaN
MDBSrug1_00041.1	24.2068	23.6295	NaN	NaN
MDBSrug1_12514.1	24.4843	22.8571	NaN	NaN
MDBSrug1_08997.1;MDBSrug1_06795.1	34.2266	37.3973	NaN	NaN
MDBSrug1_07054.2	37.7366	51.7177	NaN	NaN
MDBSrug1_02428.1	40.0333	29.9664	NaN	NaN
MDBSrug1_01898.1;MDBSrug1_09288.1	43.1842	44.6323	NaN	NaN
MDBSrug1_08291.1	46.959	45.3859	NaN	NaN
MDBSrug1_05845.1	52.3428	37.403	NaN	NaN
MDBSrug1_03905.1;MDBSrug1_04983.1	55.0968	55.4525	NaN	NaN
MDBSrug1_10381.1	59.715	74.0011	NaN	NaN
MDBSrug1_11396.1	68.8275	65.6232	NaN	NaN
MDBSrug1_00124.1	139.792	170.307	NaN	NaN
MDBSrug1_06967.1;MDBSrug1_00483.1	154.881	169.186	NaN	NaN
MDBSrug1_06252.1	353.711	364.849	NaN	NaN
MDBSrug1_08342.1	1089.25	1502.05	NaN	NaN
MDBSrug1_00049.1	NaN	NaN	1.67215	1.28157
MDBSrug1_00062.1	NaN	NaN	0.977512	0.733022
MDBSrug1_00101.1	NaN	NaN	0.248201	0.0587878
MDBSrug1_00107.1	NaN	NaN	0.257625	0.0525684
MDBSrug1_00175.1	NaN	NaN	0.874579	0.360681
MDBSrug1_00199.1	NaN	NaN	16.0158	7.60105
MDBSrug1_00268.1	NaN	NaN	0.611347	0.49475
MDBSrug1_00284.1	NaN	NaN	0.377594	0.285668
MDBSrug1_00298.1	NaN	NaN	0.252772	0.145846
MDBSrug1_00383.1;MDBSrug1_06868.1	NaN	NaN	0.0816178	0.0810501
MDBSrug1_00395.1	NaN	NaN	0.00932463	0.101849
MDBSrug1_00433.1	NaN	NaN	0.195821	0.372499
MDBSrug1_00462.1	NaN	NaN	0.804823	0.907115
MDBSrug1_00484.1	NaN	NaN	0.731442	0.70225
MDBSrug1_00487.1	NaN	NaN	1.76728	1.53391
MDBSrug1_00496.1	NaN	NaN	0.253752	0.389714
MDBSrug1_00499.1	NaN	NaN	37.7705	79.2743
MDBSrug1_00503.1	NaN	NaN	7.8363	7.59659
MDBSrug1_00551.1	NaN	NaN	0.319126	0.44999
MDBSrug1_00575.1	NaN	NaN	94.2338	87.6424
MDBSrug1_00598.1	NaN	NaN	1.5579	0.2373
MDBSrug1_00614.1	NaN	NaN	2.56863	3.4328
MDBSrug1_00621.1	NaN	NaN	0.431002	1.32175
MDBSrug1_00626.1;MDBSrug1_10415.1	NaN	NaN	21.7709	20.7967
MDBSrug1_00630.2	NaN	NaN	0.951178	0.544658
MDBSrug1_00672.1;MDBSrug1_12750.1;MDBSrug1_01411.1	NaN	NaN	17.411	19.2431
MDBSrug1_00719.1	NaN	NaN	2.07046	2.61026
MDBSrug1_00735.1	NaN	NaN	0.106095	0.0998743
MDBSrug1_00796.1	NaN	NaN	0.582461	0.935658
MDBSrug1_00797.1;MDBSrug1_02565.1	NaN	NaN	1.13485	1.18192
MDBSrug1_00812.1	NaN	NaN	0.261993	0.0339481
MDBSrug1_00823.1	NaN	NaN	0.0976107	0.0286406
MDBSrug1_00832.1	NaN	NaN	0.567149	0.797284
MDBSrug1_00848.1	NaN	NaN	2.89596	3.45948
MDBSrug1_00912.1	NaN	NaN	0.21097	0.269167
MDBSrug1_00919.2	NaN	NaN	4.32075	5.62457
MDBSrug1_00952.1	NaN	NaN	0.117842	0.201642
MDBSrug1_01079.1	NaN	NaN	0.0381033	0.0573728
MDBSrug1_01092.1	NaN	NaN	0.00350205	0.0112049
MDBSrug1_01107.1	NaN	NaN	0.439731	0.3382
MDBSrug1_01136.1	NaN	NaN	1.65843	1.38617
MDBSrug1_01139.2	NaN	NaN	0.431261	0.655747
MDBSrug1_01179.1	NaN	NaN	0.174635	0.185623
MDBSrug1_01213.1	NaN	NaN	0.153871	0.178313
MDBSrug1_01234.1	NaN	NaN	0.375633	0.450436
MDBSrug1_01239.1	NaN	NaN	0.188682	0.584715
MDBSrug1_01248.1	NaN	NaN	0.0223187	0.00806933
MDBSrug1_01252.1	NaN	NaN	1.01653	1.23766
MDBSrug1_01254.1	NaN	NaN	0.378592	0.781756
MDBSrug1_01330.1	NaN	NaN	2.21659	4.83033
MDBSrug1_01337.1	NaN	NaN	0.0131819	0.0369605
MDBSrug1_01388.1	NaN	NaN	0.0107826	0.037301
MDBSrug1_01396.1;MDBSrug1_04902.2	NaN	NaN	0.0824167	0.0833245
MDBSrug1_01426.1	NaN	NaN	0.35633	0.493209
MDBSrug1_01443.1	NaN	NaN	0.103177	0.0617109
MDBSrug1_01446.1	NaN	NaN	1155.68	1390.03
MDBSrug1_01499.1	NaN	NaN	9.50475	11.0436
MDBSrug1_01520.1	NaN	NaN	0.42612	0.22716
MDBSrug1_01578.1	NaN	NaN	0.469986	0.24688
MDBSrug1_01673.1	NaN	NaN	0.316333	0.24032
MDBSrug1_01681.1	NaN	NaN	1.024	1.20118
MDBSrug1_01699.1	NaN	NaN	2.61438	4.39489
MDBSrug1_01714.1	NaN	NaN	1.61113	3.24614
MDBSrug1_01776.1	NaN	NaN	0.11232	0.329718
MDBSrug1_01783.1;MDBSrug1_05732.1	NaN	NaN	0.206376	0.58131
MDBSrug1_01798.1	NaN	NaN	0.359178	0.730752
MDBSrug1_01863.1	NaN	NaN	2.3314	1.6332
MDBSrug1_01930.1	NaN	NaN	0.0908126	0.087614
MDBSrug1_01946.1	NaN	NaN	0.556977	0.196902
MDBSrug1_02008.1	NaN	NaN	0.380627	0.163693
MDBSrug1_02030.1	NaN	NaN	0.476199	0.201983
MDBSrug1_02060.2;MDBSrug1_02669.1;MDBSrug1_05203.1	NaN	NaN	0.094404	0.275528
MDBSrug1_02071.1	NaN	NaN	4.58372	4.71518
MDBSrug1_02084.1	NaN	NaN	9.54285	11.1453
MDBSrug1_02093.1	NaN	NaN	9.0857	11.7677
MDBSrug1_02101.1	NaN	NaN	0.405518	0.123256
MDBSrug1_02203.1	NaN	NaN	8.02234	6.97993
MDBSrug1_02217.1;MDBSrug1_12052.1	NaN	NaN	0.726412	0.735374
MDBSrug1_02242.1	NaN	NaN	0.415542	0.817434
MDBSrug1_02303.1	NaN	NaN	0.194341	0.0345052
MDBSrug1_02311.1	NaN	NaN	0.513408	0.5552
MDBSrug1_02394.1	NaN	NaN	0.543219	1.00624
MDBSrug1_02402.1	NaN	NaN	3.00166	3.87991
MDBSrug1_02432.1	NaN	NaN	5.50542	4.83276
MDBSrug1_02501.1	NaN	NaN	0.273388	0.0946888
MDBSrug1_02592.1	NaN	NaN	0.225014	0.0746969
MDBSrug1_02593.1	NaN	NaN	0.0715908	0.0912102
MDBSrug1_04943.1;MDBSrug1_10914.1;MDBSrug1_02596.1;MDBSrug1_06944.1;MDBSrug1_10631.2;MDBSrug1_05240.1;MDBSrug1_09534.1;MDBSrug1_09151.1	NaN	NaN	0.100011	0.116959
MDBSrug1_02727.1;MDBSrug1_03875.1;MDBSrug1_07262.1;MDBSrug1_08617.1;MDBSrug1_00025.1;MDBSrug1_07024.1	NaN	NaN	0.41458	0.544212
MDBSrug1_02751.1	NaN	NaN	0.434886	0.308555
MDBSrug1_02771.1	NaN	NaN	0.00949144	0.00926292
MDBSrug1_02822.1	NaN	NaN	1.14806	1.51916
MDBSrug1_02846.1	NaN	NaN	3.15775	2.40523
MDBSrug1_02868.1	NaN	NaN	4.78714	5.06548
MDBSrug1_02871.2	NaN	NaN	0.191012	0.133704
MDBSrug1_02897.1	NaN	NaN	0.537893	0.391007
MDBSrug1_02908.1	NaN	NaN	0.180926	0.162497
MDBSrug1_02936.1	NaN	NaN	0.234179	0.22808
MDBSrug1_02968.1	NaN	NaN	0.0662389	0.0302242
MDBSrug1_03053.1	NaN	NaN	16.6624	13.5025
MDBSrug1_03070.1	NaN	NaN	0.159393	0.166004
MDBSrug1_03078.1	NaN	NaN	1.52088	1.47468
MDBSrug1_03102.1	NaN	NaN	9.57392	11.1859
MDBSrug1_03109.1	NaN	NaN	0.228583	0.448814
MDBSrug1_03110.1	NaN	NaN	1.32829	1.27034
MDBSrug1_03220.1	NaN	NaN	0.174328	0.0316647
MDBSrug1_03224.1	NaN	NaN	0.896623	0.45818
MDBSrug1_03229.1	NaN	NaN	0.0755076	0.00630286
MDBSrug1_03297.1	NaN	NaN	0.0582572	0.187545
MDBSrug1_03379.1	NaN	NaN	0.443614	0.495236
MDBSrug1_03384.1	NaN	NaN	0.564116	0.54328
MDBSrug1_03532.1	NaN	NaN	0.536487	0.647719
MDBSrug1_03569.1	NaN	NaN	3.96716	7.04521
MDBSrug1_03581.1	NaN	NaN	0.0481821	0.129751
MDBSrug1_03600.1	NaN	NaN	0.227007	0.143
MDBSrug1_03709.1	NaN	NaN	2.03037	2.15982
MDBSrug1_03723.1	NaN	NaN	0.270119	0.0825096
MDBSrug1_03755.1	NaN	NaN	0.344206	0.203248
MDBSrug1_03803.1	NaN	NaN	0.0141765	0.018806
MDBSrug1_03848.1	NaN	NaN	2.68758	2.13537
MDBSrug1_03874.1	NaN	NaN	1.69908	1.96529
MDBSrug1_03936.1;MDBSrug1_02760.1	NaN	NaN	27.793	30.5648
MDBSrug1_03949.1	NaN	NaN	0.605651	0.603081
MDBSrug1_03979.2	NaN	NaN	0.226904	0.257166
MDBSrug1_03980.1	NaN	NaN	0.0583386	0.165571
MDBSrug1_04008.2	NaN	NaN	0.165222	0.144306
MDBSrug1_04012.1	NaN	NaN	0.131749	0.298776
MDBSrug1_04016.1;MDBSrug1_06057.2	NaN	NaN	2.89744	0.926617
MDBSrug1_04023.1	NaN	NaN	1.43063	2.03843
MDBSrug1_04046.1	NaN	NaN	0.100651	0.271518
MDBSrug1_04060.1	NaN	NaN	1.5559	1.0047
MDBSrug1_04071.1	NaN	NaN	0.302522	1.01054
MDBSrug1_04092.1	NaN	NaN	0.427229	0.610947
MDBSrug1_04119.1;MDBSrug1_00296.1	NaN	NaN	6.53586	6.15406
MDBSrug1_04136.1	NaN	NaN	0.567851	0.47983
MDBSrug1_04138.1	NaN	NaN	4.26564	5.31482
MDBSrug1_04248.1	NaN	NaN	0.613197	0.741212
MDBSrug1_04254.1	NaN	NaN	1.98509	2.08802
MDBSrug1_04294.1	NaN	NaN	0.892037	0.643098
MDBSrug1_04460.1	NaN	NaN	0.00376373	0.0484087
MDBSrug1_04461.1	NaN	NaN	0.455561	0.409568
MDBSrug1_04465.1;MDBSrug1_04424.1	NaN	NaN	9.84651	10.8015
MDBSrug1_04510.1	NaN	NaN	0.081566	0.261131
MDBSrug1_04542.1	NaN	NaN	0.0123102	0.0529941
MDBSrug1_04563.1	NaN	NaN	0.154255	0.152929
MDBSrug1_04607.1	NaN	NaN	0.112376	0.241492
MDBSrug1_04637.1	NaN	NaN	0.616932	0.661991
MDBSrug1_04675.1	NaN	NaN	4.08551	1.28453
MDBSrug1_04685.1	NaN	NaN	0.0722417	0.0177077
MDBSrug1_04704.1	NaN	NaN	0.546067	0.437421
MDBSrug1_04838.1	NaN	NaN	9.85279	7.8804
MDBSrug1_11732.1;MDBSrug1_04892.1	NaN	NaN	0.564634	0.546037
MDBSrug1_04895.1	NaN	NaN	0.00874394	0.030898
MDBSrug1_04922.1	NaN	NaN	9.46185	7.28441
MDBSrug1_04972.1	NaN	NaN	0.12187	0.100677
MDBSrug1_04978.1	NaN	NaN	8.49133	8.92925
MDBSrug1_05003.1	NaN	NaN	0.64175	1.36967
MDBSrug1_05022.1	NaN	NaN	0.117299	0.207237
MDBSrug1_05027.1	NaN	NaN	2.8302	3.21751
MDBSrug1_05125.1	NaN	NaN	8.39479	11.7997
MDBSrug1_05163.1	NaN	NaN	1.40641	1.08145
MDBSrug1_05167.1	NaN	NaN	3.03469	3.83572
MDBSrug1_05179.1	NaN	NaN	0.335122	0.292771
MDBSrug1_05217.1	NaN	NaN	0.188371	0.186986
MDBSrug1_05218.1	NaN	NaN	0.195846	0.356367
MDBSrug1_05333.1	NaN	NaN	1.11133	2.44898
MDBSrug1_05380.1	NaN	NaN	5.59862	3.83053
MDBSrug1_05390.1	NaN	NaN	0.779265	0.491263
MDBSrug1_05399.1	NaN	NaN	0.133092	0.0788121
MDBSrug1_05401.2	NaN	NaN	0.00489588	0.240604
MDBSrug1_05415.1	NaN	NaN	0.00361837	0.0085445
MDBSrug1_05426.1	NaN	NaN	0.297196	0.304204
MDBSrug1_05461.1	NaN	NaN	1.45641	1.69232
MDBSrug1_05477.1	NaN	NaN	0.00619447	0.00394024
MDBSrug1_05502.1	NaN	NaN	4.6895	10.9479
MDBSrug1_05514.1	NaN	NaN	0.0462588	0.0480032
MDBSrug1_05525.1	NaN	NaN	7.65765	7.56132
MDBSrug1_05553.1	NaN	NaN	0.384769	1.45915
MDBSrug1_05565.1	NaN	NaN	0.277501	0.169811
MDBSrug1_05700.1	NaN	NaN	0.0413396	0.0317048
MDBSrug1_05779.1	NaN	NaN	0.911936	0.735293
MDBSrug1_05812.1	NaN	NaN	0.0421238	0.0352962
MDBSrug1_05847.1	NaN	NaN	0.202678	0.0990553
MDBSrug1_05849.1	NaN	NaN	0.213899	0.895601
MDBSrug1_05875.1	NaN	NaN	0.611791	0.360843
MDBSrug1_05944.1;MDBSrug1_07596.1;MDBSrug1_11380.1;MDBSrug1_02784.1	NaN	NaN	1.66109	3.04083
MDBSrug1_05952.1	NaN	NaN	1.04605	0.95151
MDBSrug1_05997.1	NaN	NaN	0.162318	0.552564
MDBSrug1_06113.1	NaN	NaN	0.125709	0.26148
MDBSrug1_06124.1	NaN	NaN	0.130118	0.132167
MDBSrug1_06138.1	NaN	NaN	0.385139	1.72349
MDBSrug1_06152.1	NaN	NaN	0.101908	0.241581
MDBSrug1_06179.1	NaN	NaN	2.05999	1.56655
MDBSrug1_06185.1	NaN	NaN	1.00381	1.16732
MDBSrug1_06210.1	NaN	NaN	1.67922	1.21431
[truncated: 189 more rows]
