# Supplementary material for: Whole Genome Sequence of an Edible Mushroom Stropharia rugosoannulata (Daqiugaigu)
Source: J Fungi (Basel). 2022 Jan 20;8(2):99. doi: 10.3390/jof8020099 (PMC8880121; doi:10.3390/jof8020099)
Supplement: Supplementary file 1 [file jof-08-00099-s001.zip › Supplementary File(s)/Table S6.xlsx]

## Sheet: Sheet1
Table S6 GO classification of up-regulated DAPs in Cap group compared with Sti group.
protein_id	Cap-1	Cap-2	Sti-1	Sti-2	foldChange_Cap-1_vs_Sti-1	p-value_Cap-1_vs_Sti-1	q_value_Cap-1_vs_Sti-1	MF	CC	BP
MDBSrug1_06262.1	317.459	354.667	0.429892	0.420555	0.00126531	0.0352506	0.00554998
MDBSrug1_03879.1	76.8236	86.7615	0.20702	0.167882	0.00229178	0.0387135	0.00645728
MDBSrug1_00750.1	19.658	14.1178	0.0452676	0.0616217	0.00316467	0.103822	0.0394086	hydrolase activity, hydrolyzing O-glycosyl compounds [GO:0004553]		carbohydrate metabolic process [GO:0005975]
MDBSrug1_07619.1	120.674	118.674	0.496172	0.372463	0.00362917	0.00516544	0.000120782			hemolysis by symbiont of host erythrocytes [GO:0019836]
MDBSrug1_11616.1;MDBSrug1_11228.1;MDBSrug1_03352.1	47.8096	33.1548	0.616895	0.168855	0.00970488	0.114813	0.0459072
MDBSrug1_03899.1	2.03548	1.90051	0.0327618	0.0220616	0.0139287	0.0213345	0.00211183		integral component of membrane [GO:0016021]
MDBSrug1_02029.1	26.994	31.2436	0.628065	0.395617	0.0175777	0.0465924	0.0088609	RNA binding [GO:0003723]; ribonuclease T2 activity [GO:0033897]		RNA phosphodiester bond hydrolysis, endonucleolytic [GO:0090502]
MDBSrug1_03179.1	15.705	14.774	0.289026	0.249755	0.0176771	0.0195758	0.00167836	peptidase activity, acting on L-amino acid peptides [GO:0070011]
MDBSrug1_01884.1	1.55841	1.7704	0.0230876	0.043584	0.0200286	0.0395861	0.0067571	calcium-transporting ATPase activity [GO:0005388]; ATP binding [GO:0005524]; metal ion binding [GO:0046872]	integral component of membrane [GO:0016021]	calcium ion transmembrane transport [GO:0070588]
MDBSrug1_09950.1	0.245559	0.200985	0.00536228	0.00425948	0.0215472	0.0645771	0.0158045
MDBSrug1_08334.1	14.5105	17.0125	0.806635	0.0753497	0.0279791	0.0370597	0.00606588
MDBSrug1_04910.1;REV__MDBSrug1_00357.1	5.0957	4.72914	0.130148	0.161557	0.0296905	0.0234779	0.00250699	oxidoreductase activity [GO:0016491]		oxidation-reduction process [GO:0055114]
MDBSrug1_01644.1	0.44843	0.427057	0.0175345	0.0102972	0.0317899	0.00791497	0.000289948
MDBSrug1_09188.1;MDBSrug1_00290.1	9.37053	8.52077	0.271639	0.316392	0.0328668	0.0307967	0.00444068	nucleic acid binding [GO:0003676]
MDBSrug1_11281.1;MDBSrug1_12401.1	2.06426	2.12795	0.0233273	0.115516	0.0331194	0.00147952	4.61268e-06	acyl-CoA dehydrogenase activity [GO:0003995]; heme binding [GO:0020037]; metal ion binding [GO:0046872]; flavin adenine dinucleotide binding [GO:0050660]		oxidation-reduction process [GO:0055114]
MDBSrug1_09318.1	251.478	341.599	10.4054	9.37604	0.0333538	0.0992264	0.0359628
MDBSrug1_02250.1	19.5343	24.5373	1.02704	0.64176	0.0378656	0.0732751	0.020332	aspartic-type endopeptidase activity [GO:0004190]		proteolysis [GO:0006508]
MDBSrug1_09362.1	12.2772	12.4678	0.442098	0.510075	0.0384793	0.00175705	8.21693e-06	glucan exo-1,3-beta-glucosidase activity [GO:0004338]		carbohydrate metabolic process [GO:0005975]
MDBSrug1_07977.1	6.4507	5.95048	0.303972	0.204075	0.0409676	0.0216066	0.00218929	hydrolase activity [GO:0016787]	intracellular membrane-bounded organelle [GO:0043231]; cytoplasmic part [GO:0044444]
MDBSrug1_01751.1	13.7595	12.2225	0.544106	0.646544	0.0458259	0.0386071	0.00640944
MDBSrug1_00224.1	7.72985	7.50313	0.355058	0.345238	0.0459724	0.00979344	0.000435095	oxidoreductase activity [GO:0016491]		oxidation-reduction process [GO:0055114]
MDBSrug1_10798.1	3.69249	3.69641	0.239616	0.187079	0.057748	0.00457214	9.26544e-05	oxidoreductase activity, acting on CH-OH group of donors [GO:0016614]; flavin adenine dinucleotide binding [GO:0050660]		oxidation-reduction process [GO:0055114]
MDBSrug1_03370.1	6.86822	5.37991	0.469431	0.263272	0.0598216	0.076961	0.0226144
MDBSrug1_06950.1	9.77033	12.7524	0.853682	0.504723	0.0603126	0.0854813	0.0273833	oxidoreductase activity [GO:0016491]		oxidation-reduction process [GO:0055114]
MDBSrug1_02532.1	0.386617	0.437137	0.0378592	0.0120916	0.0606381	0.0153132	0.00100258	translation initiation factor activity [GO:0003743]; GTPase activity [GO:0003924]; GTP binding [GO:0005525]; amino acid transmembrane transporter activity [GO:0015171]	integral component of membrane [GO:0016021]	amino acid transmembrane transport [GO:0003333]; translational initiation [GO:0006413]
MDBSrug1_06105.1	4.53073	4.50899	0.118475	0.447273	0.0625847	0.0240916	0.00264763	1,4-alpha-glucan branching enzyme activity [GO:0003844]; hydrolase activity, hydrolyzing O-glycosyl compounds [GO:0004553]; cation binding [GO:0043169]		glycogen biosynthetic process [GO:0005978]
MDBSrug1_02820.1	9.86673	12.6932	0.915227	0.510521	0.0631982	0.0793855	0.024255	GTP binding [GO:0005525]
MDBSrug1_10406.1	17.3637	17.4707	0.732552	1.80596	0.0728737	0.0199472	0.00180349	agmatinase activity [GO:0008783]; metal ion binding [GO:0046872]
MDBSrug1_01453.4	1.93847	1.91639	0.0487813	0.256955	0.0793119	0.0353505	0.00559326	urease activity [GO:0009039]; nickel cation binding [GO:0016151]	cytosol [GO:0005829]	urea catabolic process [GO:0043419]
MDBSrug1_05650.1	0.561069	0.678372	0.0499871	0.0546969	0.0844606	0.0651897	0.0162085	structural constituent of nuclear pore [GO:0017056]	nuclear pore linkers [GO:0044612]; nuclear pore nuclear basket [GO:0044615]	ribosomal large subunit export from nucleus [GO:0000055]; protein import into nucleus [GO:0006606]; nuclear pore organization [GO:0006999]
MDBSrug1_01654.2	142.472	146.181	11.7439	12.956	0.0855696	0.0040829	7.63754e-05		integral component of membrane [GO:0016021]
MDBSrug1_04935.1	66.825	66.8298	6.96638	4.65315	0.0869369	0.0120656	0.000639484	transferase activity, transferring alkyl or aryl (other than methyl) groups [GO:0016765]; pyridoxal phosphate binding [GO:0030170]		cellular amino acid metabolic process [GO:0006520]
MDBSrug1_09101.1	4.07634	3.28401	0.505899	0.135398	0.0871287	0.0399261	0.00684625	oxidoreductase activity [GO:0016491]		oxidation-reduction process [GO:0055114]
MDBSrug1_12576.1	5.39519	4.45134	0.609387	0.24877	0.0871532	0.0412272	0.00726216	transferase activity [GO:0016740]
MDBSrug1_08615.1	9.916	9.67615	0.681658	1.14348	0.0931567	0.00374487	5.5458e-05	oxidoreductase activity [GO:0016491]		oxidation-reduction process [GO:0055114]
MDBSrug1_06725.1	47.5048	41	3.75485	4.58099	0.0941852	0.0482322	0.00947351	oxidoreductase activity [GO:0016491]		oxidation-reduction process [GO:0055114]
MDBSrug1_02153.1	15.3534	11.469	1.15131	1.37653	0.0942437	0.0999816	0.0365482	peroxidase activity [GO:0004601]	membrane [GO:0016020]	cellular oxidant detoxification [GO:0098869]
MDBSrug1_00599.1	14.5839	16.494	1.5704	1.57843	0.101321	0.0434686	0.00799579
MDBSrug1_09212.1	2.85493	2.61337	0.0786996	0.489195	0.103852	0.0182157	0.00147656	calcium ion binding [GO:0005509]; 1-phosphatidylinositol 4-kinase activator activity [GO:0098744]	Golgi membrane [GO:0000139]; nucleus [GO:0005634]; cytosol [GO:0005829]; plasma membrane [GO:0005886]	negative regulation of induction of conjugation with cellular fusion [GO:0010515]; positive regulation of phosphorylation [GO:0042327]; positive regulation of catalytic activity [GO:0043085]; positive regulation of cAMP-mediated signaling [GO:0043950]; cellular response to calcium ion [GO:0071277]; negative regulation of calcium ion import [GO:0090281]
MDBSrug1_03104.1	0.961331	1.05925	0.0887229	0.123272	0.104918	0.0193454	0.00164353	4-alpha-glucanotransferase activity [GO:0004134]; amylo-alpha-1,6-glucosidase activity [GO:0004135]	cytoplasm [GO:0005737]	glycogen catabolic process [GO:0005980]
MDBSrug1_06190.1	1.38112	1.0831	0.171428	0.0916927	0.106777	0.0691829	0.0183877	catalytic activity [GO:0003824]
MDBSrug1_00095.1	5.01559	6.57029	0.387136	0.859031	0.107559	0.0738212	0.0206561
MDBSrug1_03958.2	1.92787	1.57712	0.0967415	0.294725	0.111688	0.0305812	0.0043381	long-chain fatty acid-CoA ligase activity [GO:0004467]		long-chain fatty acid metabolic process [GO:0001676]
MDBSrug1_00305.1	1.50408	1.2362	0.134693	0.177255	0.113838	0.0640462	0.0154749	ligase activity [GO:0016874]		metabolic process [GO:0008152]
MDBSrug1_12002.1	8.4015	8.55435	1.32278	0.662193	0.117067	0.0212124	0.00208322
MDBSrug1_09615.1	7.21415	5.43352	0.746422	0.758767	0.119009	0.100868	0.0372655	L-alanine:2-oxoglutarate aminotransferase activity [GO:0004021]; pyridoxal phosphate binding [GO:0030170]	cytosol [GO:0005829]	biosynthetic process [GO:0009058]
MDBSrug1_10060.1	9.39569	8.04269	1.05485	1.11948	0.124687	0.0557754	0.0120854	peptidase activity [GO:0008233]; metal ion binding [GO:0046872]		proteolysis [GO:0006508]
MDBSrug1_01392.1	28.8974	35.6858	3.86507	4.34016	0.127049	0.075042	0.0215241	zinc ion binding [GO:0008270]; oxidoreductase activity [GO:0016491]		oxidation-reduction process [GO:0055114]
MDBSrug1_04678.1	304.987	316.079	42.771	38.8064	0.131351	0.00568825	0.000146307
MDBSrug1_00324.1	99.0076	101.03	13.5507	12.7865	0.131661	0.00251168	2.3492e-05
MDBSrug1_01972.1	2.565	2.13364	0.0938677	0.536671	0.134196	0.02236	0.00233534	nicotinate-nucleotide diphosphorylase (carboxylating) activity [GO:0004514]; nicotinate phosphoribosyltransferase activity [GO:0004516]; ligase activity [GO:0016874]	chromosome, telomeric region [GO:0000781]; nucleus [GO:0005634]; mitochondrion [GO:0005739]	chromatin silencing at rDNA [GO:0000183]; replicative cell aging [GO:0001302]; chromatin silencing at telomere [GO:0006348]; NAD biosynthetic process [GO:0009435]; nicotinate nucleotide salvage [GO:0019358]
MDBSrug1_04522.1	4.8164	4.59545	0.558716	0.710156	0.134816	0.00205978	1.28435e-05	dihydroxy-acid dehydratase activity [GO:0004160]	integral component of membrane [GO:0016021]	branched-chain amino acid biosynthetic process [GO:0009082]
MDBSrug1_06800.1	2.63709	3.59875	0.555313	0.290302	0.135606	0.0932795	0.0319898
MDBSrug1_10560.1	9.56227	9.1753	1.12956	1.42477	0.136322	0.0013145	3.07366e-06	glutathione peroxidase activity [GO:0004602]; thioredoxin peroxidase activity [GO:0008379]; unfolded protein binding [GO:0051082]	nucleus [GO:0005634]; cytosol [GO:0005829]	oxidation-reduction process [GO:0055114]; cellular oxidant detoxification [GO:0098869]
MDBSrug1_08127.1	0.084249	0.133193	0.0262196	0.00398159	0.138893	0.119543	0.0488235		nuclear chromatin [GO:0000790]; replication fork protection complex [GO:0031298]; FACT complex [GO:0035101]; mitotic spindle pole body [GO:0044732]	DNA-dependent DNA replication [GO:0006261]; nucleosome assembly [GO:0006334]; transcription elongation from RNA polymerase II promoter [GO:0006368]; chromatin organization involved in regulation of transcription [GO:0034401]; DNA replication-independent nucleosome organization [GO:0034724]; positive regulation of RNA polymerase II transcriptional preinitiation complex assembly [GO:0045899]
MDBSrug1_12264.1	0.383498	0.288685	0.031495	0.0627569	0.140218	0.0785739	0.023762
MDBSrug1_12683.1;MDBSrug1_07019.1	4.27058	5.17137	0.697452	0.646098	0.142296	0.0697198	0.0186934	alpha-L-arabinofuranosidase activity [GO:0046556]		L-arabinose metabolic process [GO:0046373]
MDBSrug1_04108.1	3.43773	4.31423	0.475977	0.630043	0.142676	0.0757837	0.0219731
MDBSrug1_02506.1	2.13639	2.10455	0.248408	0.394109	0.151503	0.0198907	0.00178288	nucleic acid binding [GO:0003676]
MDBSrug1_00218.1	2.54586	2.40956	0.411399	0.342396	0.152115	0.00551473	0.000133248	nitronate monooxygenase activity [GO:0018580]; dioxygenase activity [GO:0051213]		oxidation-reduction process [GO:0055114]
MDBSrug1_01764.1	1.64627	1.61121	0.216233	0.283803	0.153504	0.00343434	4.55056e-05	hydrolase activity, hydrolyzing O-glycosyl compounds [GO:0004553]		carbohydrate metabolic process [GO:0005975]
MDBSrug1_08912.1;MDBSrug1_02775.1	10.1311	11.7649	2.22099	1.16785	0.154769	0.0176319	0.00134679
MDBSrug1_08552.1	4.07812	3.7963	0.364467	0.863896	0.155994	0.01628	0.00114201
MDBSrug1_01267.3	2.61452	2.56301	0.334789	0.490047	0.159311	0.0123962	0.000666672	glutamate dehydrogenase (NADP+) activity [GO:0004354]	cytosol [GO:0005829]	cellular amino acid metabolic process [GO:0006520]; oxidation-reduction process [GO:0055114]
MDBSrug1_07760.1	238.406	261.588	42.9005	37.1689	0.16014	0.0262288	0.0030665
MDBSrug1_12698.1;MDBSrug1_06001.1	17.0206	17.4462	2.21637	3.36886	0.162047	0.0125089	0.000682481
MDBSrug1_08478.1	16.2235	14.7621	1.96423	3.32577	0.170724	0.00610296	0.000171244
MDBSrug1_07664.1	365.244	378.64	76.6949	50.5899	0.171108	0.00796771	0.00029809
MDBSrug1_00129.1	1.56812	1.7671	0.392536	0.180835	0.171914	0.011021	0.000566939	translation initiation factor activity [GO:0003743]	eukaryotic translation initiation factor 3 complex [GO:0005852]; eukaryotic 43S preinitiation complex [GO:0016282]; eukaryotic 48S preinitiation complex [GO:0033290]	formation of translation preinitiation complex [GO:0001731]; regulation of translational initiation [GO:0006446]
MDBSrug1_11220.1	15.2885	11.3808	1.41269	3.18107	0.172249	0.0715823	0.0195833	transferase activity, transferring acyl groups other than amino-acyl groups [GO:0016747]		metabolic process [GO:0008152]
MDBSrug1_08927.1	10.1347	9.97553	1.3544	2.27022	0.180238	0.0305313	0.00428343	S-formylglutathione hydrolase activity [GO:0018738]; carboxylic ester hydrolase activity [GO:0052689]	cytoplasm [GO:0005737]	formaldehyde catabolic process [GO:0046294]
MDBSrug1_02176.1	0.547459	0.578429	0.0875319	0.116704	0.1814	0.00216122	1.6845e-05	phosphorelay sensor kinase activity [GO:0000155]	intracellular [GO:0005622]; integral component of membrane [GO:0016021]	phosphorelay signal transduction system [GO:0000160]; signal transduction by protein phosphorylation [GO:0023014]
MDBSrug1_10979.1	0.598355	0.472965	0.110789	0.0856071	0.183321	0.0804575	0.0250215	oxidoreductase activity [GO:0016491]
MDBSrug1_02358.1	1.10934	0.907627	0.175881	0.194587	0.183676	0.0754215	0.0217506	metallopeptidase activity [GO:0008237]; zinc ion binding [GO:0008270]		proteolysis [GO:0006508]
MDBSrug1_01710.1	0.94687	0.913717	0.178714	0.166098	0.185324	0.0055592	0.000138655	nucleic acid binding [GO:0003676]; ATP-dependent RNA helicase activity [GO:0004004]; ATP binding [GO:0005524]; GTP binding [GO:0005525]	nucleolus [GO:0005730]; mitochondrion [GO:0005739]; cytosol [GO:0005829]; membrane [GO:0016020]	nuclear-transcribed mRNA catabolic process, nonsense-mediated decay [GO:0000184]; rRNA processing [GO:0006364]; small GTPase mediated signal transduction [GO:0007264]; nuclear polyadenylation-dependent mRNA catabolic process [GO:0071042]; messenger ribonucleoprotein complex assembly [GO:1990120]
MDBSrug1_08457.1	8.03041	6.57257	1.44565	1.26102	0.18535	0.0736202	0.0205425	dUTP diphosphatase activity [GO:0004170]	cytosol [GO:0005829]	dUTP metabolic process [GO:0046080]
MDBSrug1_08562.1	4.5761	5.61451	0.416392	1.47736	0.185833	0.0305882	0.00436293	isopentenyl-diphosphate delta-isomerase activity [GO:0004452]; hydrolase activity [GO:0016787]		isoprenoid biosynthetic process [GO:0008299]
MDBSrug1_08487.1	14.3528	10.6255	1.47516	3.16939	0.185944	0.0747957	0.0213369	oxidoreductase activity [GO:0016491]		oxidation-reduction process [GO:0055114]
MDBSrug1_01695.1	8.10271	6.82242	1.54503	1.25672	0.18772	0.0560388	0.0121862	acid phosphatase activity [GO:0003993]	integral component of membrane [GO:0016021]	dephosphorylation [GO:0016311]
MDBSrug1_09473.1	4.19118	3.70774	0.814883	0.682262	0.189538	0.0352059	0.00551551	nucleotide binding [GO:0000166]; catalytic activity [GO:0003824]	cytoplasm [GO:0005737]	biosynthetic process [GO:0009058]
MDBSrug1_07759.1	20.3704	20.465	2.61593	5.19076	0.191175	0.0492472	0.00978802
MDBSrug1_04065.1	2.13111	1.4103	0.139217	0.545591	0.193372	0.103281	0.0385594	serine-type peptidase activity [GO:0008236]		proteolysis [GO:0006508]
MDBSrug1_06791.1	42.5285	50.6875	9.24252	8.87127	0.194321	0.068384	0.0178555	aldehyde dehydrogenase (NAD) activity [GO:0004029]		ethanol catabolic process [GO:0006068]; oxidation-reduction process [GO:0055114]
MDBSrug1_04194.1;MDBSrug1_06395.1	161.25	161.281	34.8615	28.5279	0.196538	0.015554	0.00106684
MDBSrug1_02077.1	39.8029	39.9954	6.84506	8.93979	0.197809	0.0198064	0.00174444	metalloendopeptidase activity [GO:0004222]; zinc ion binding [GO:0008270]	extracellular space [GO:0005615]	proteolysis [GO:0006508]
MDBSrug1_06032.1	3.32222	3.31884	0.876798	0.43734	0.197881	0.0523882	0.010984	oxidoreductase activity, acting on the aldehyde or oxo group of donors, NAD or NADP as acceptor [GO:0016620]		oxidation-reduction process [GO:0055114]
MDBSrug1_03770.1	9.72815	7.40922	2.16093	1.32183	0.203226	0.0780197	0.0232904
MDBSrug1_00399.1	1.07542	0.835743	0.159611	0.231608	0.204701	0.0783674	0.0234553	iron ion binding [GO:0005506]; iron-sulfur cluster binding [GO:0051536]	mitochondrial matrix [GO:0005759]	intracellular sequestering of iron ion [GO:0006880]; iron-sulfur cluster assembly [GO:0016226]
MDBSrug1_02573.1	78.3441	88.8674	17.4172	16.8482	0.204923	0.049674	0.009989	electron carrier activity [GO:0009055]; protein disulfide oxidoreductase activity [GO:0015035]	intracellular membrane-bounded organelle [GO:0043231]	cell redox homeostasis [GO:0045454]; oxidation-reduction process [GO:0055114]
MDBSrug1_03735.1	7.07734	8.44678	1.61272	1.6161	0.207987	0.0706139	0.0191533
MDBSrug1_09877.1	9.66329	11.025	2.03536	2.37705	0.21328	0.0414544	0.00736679	metalloendopeptidase activity [GO:0004222]	cytosol [GO:0005829]; integral component of membrane [GO:0016021]	proteolysis [GO:0006508]; response to oxidative stress [GO:0006979]
MDBSrug1_04559.1	14.3057	13.3967	3.15238	2.85611	0.216895	0.0153605	0.00101765	transaminase activity [GO:0008483]; lyase activity [GO:0016829]
MDBSrug1_05243.1	0.431594	0.526238	0.133928	0.0752078	0.218342	0.0333163	0.00495979			cysteine biosynthetic process from serine [GO:0006535]
MDBSrug1_02981.1	6.15085	4.66226	1.60132	0.771822	0.219469	0.0613318	0.0145322	2-methylcitrate dehydratase activity [GO:0047547]; 2 iron, 2 sulfur cluster binding [GO:0051537]		propionate catabolic process, 2-methylcitrate cycle [GO:0019629]
MDBSrug1_08780.1	0.555221	0.442493	0.116992	0.106215	0.223718	0.0895354	0.0297986	nucleic acid binding [GO:0003676]; catalytic activity [GO:0003824]	nucleus [GO:0005634]
MDBSrug1_00214.1	1.63366	1.86141	0.235008	0.565254	0.228969	0.0288518	0.00380043	histidinol dehydrogenase activity [GO:0004399]; phosphoribosyl-AMP cyclohydrolase activity [GO:0004635]; phosphoribosyl-ATP diphosphatase activity [GO:0004636]; zinc ion binding [GO:0008270]; NAD binding [GO:0051287]		histidine biosynthetic process [GO:0000105]; oxidation-reduction process [GO:0055114]
MDBSrug1_05551.1	1.64227	1.69169	0.55106	0.214296	0.229563	0.0775289	0.0229626	methyltransferase activity [GO:0008168]	integral component of membrane [GO:0016021]	methylation [GO:0032259]
MDBSrug1_03395.1	0.704792	0.575754	0.19774	0.0964971	0.229775	0.0302012	0.00421357	urate oxidase activity [GO:0004846]	nucleus [GO:0005634]; peroxisome [GO:0005777]; cytosol [GO:0005829]	purine nucleobase metabolic process [GO:0006144]; urate catabolic process [GO:0019628]; oxidation-reduction process [GO:0055114]
MDBSrug1_00291.1	5.16233	7.11497	2.13763	0.685263	0.229928	0.0684152	0.017917	pyridoxamine-phosphate oxidase activity [GO:0004733]; FMN binding [GO:0010181]	membrane [GO:0016020]	pyridoxal phosphate biosynthetic process [GO:0042823]; oxidation-reduction process [GO:0055114]
MDBSrug1_01694.1	8.14489	7.27661	1.68658	1.86556	0.230337	0.0387934	0.00650083	beta-glucosidase activity [GO:0008422]; scopolin beta-glucosidase activity [GO:0102483]		cellulose catabolic process [GO:0030245]
MDBSrug1_09903.1	29.2617	31.967	6.57247	7.67363	0.23267	0.01771	0.00136655	GTP binding [GO:0005525]
MDBSrug1_00091.1	0.865138	0.798349	0.189903	0.205327	0.237591	0.0258146	0.00293759	transferase activity, transferring acyl groups other than amino-acyl groups [GO:0016747]		metabolic process [GO:0008152]
MDBSrug1_08340.1	5.43241	6.12977	1.32396	1.47322	0.241925	0.0419179	0.00754719
MDBSrug1_05625.1	55.3023	49.3796	12.6271	12.9045	0.243897	0.047102	0.00906797
MDBSrug1_12506.1	8.09279	6.26807	1.66868	1.87346	0.246652	0.10282	0.0383071	6-phosphogluconolactonase activity [GO:0017057]	nucleus [GO:0005634]; cytosol [GO:0005829]	carbohydrate metabolic process [GO:0005975]; pentose-phosphate shunt [GO:0006098]
MDBSrug1_11245.1	4.04976	3.51713	0.911455	0.991121	0.251434	0.0548114	0.0117911		integral component of membrane [GO:0016021]	vesicle-mediated transport [GO:0016192]
MDBSrug1_07109.1	2.20391	1.73489	0.513888	0.480924	0.252568	0.0991849	0.0358705	lyase activity [GO:0016829]
MDBSrug1_09705.1	1.57025	1.54234	0.330847	0.456882	0.253078	0.0272019	0.00334988	clathrin binding [GO:0030276]	nucleus [GO:0005634]; endosome [GO:0005768]; cytosol [GO:0005829]; AP-1 adaptor complex [GO:0030121]; cell division site [GO:0032153]; mitotic spindle pole body [GO:0044732]; cell tip [GO:0051286]	intracellular protein transport [GO:0006886]; Golgi to vacuole transport [GO:0006896]; endosomal transport [GO:0016197]; vacuole fusion, non-autophagic [GO:0042144]
MDBSrug1_08639.1	0.955412	0.888389	0.190247	0.279858	0.254965	0.00868769	0.000372426
MDBSrug1_08595.1	1.81686	1.83978	0.323538	0.622988	0.258851	0.0686246	0.0180253	isomerase activity [GO:0016853]		protein peptidyl-prolyl isomerization [GO:0000413]
MDBSrug1_06081.1	1.37432	1.00404	0.268007	0.348498	0.259214	0.118778	0.0484187	calcium ion binding [GO:0005509]	integral component of membrane [GO:0016021]	transmembrane transport [GO:0055085]
MDBSrug1_03555.1	0.630255	0.612578	0.247198	0.0829434	0.265636	0.110025	0.0432211	phosphatase activity [GO:0016791]		dephosphorylation [GO:0016311]
MDBSrug1_04317.1	3.88495	3.92299	0.926212	1.15188	0.26615	0.02142	0.00215369	aminopeptidase activity [GO:0004177]; metallopeptidase activity [GO:0008237]; metal ion binding [GO:0046872]		proteolysis [GO:0006508]
MDBSrug1_06380.1	5.96725	6.8708	1.93731	1.49726	0.267531	0.0286097	0.00374624
MDBSrug1_05558.1	2.13958	1.77467	0.632282	0.415528	0.267691	0.0351273	0.00547581	argininosuccinate synthase activity [GO:0004055]; ATP binding [GO:0005524]		arginine biosynthetic process [GO:0006526]
MDBSrug1_01885.1	0.665273	0.560222	0.102371	0.229114	0.270491	0.0347282	0.00533238
MDBSrug1_07668.2	1.50259	1.35583	0.457817	0.322299	0.272918	0.00930906	0.000406319	phosphoprotein phosphatase activity [GO:0004721]	cytosol [GO:0005829]; cell division site [GO:0032153]	protein dephosphorylation [GO:0006470]; negative regulation of calcium ion transport into cytosol [GO:0010523]; cellular chloride ion homeostasis [GO:0030644]; cellular response to salt stress [GO:0071472]; fungal-type cell wall organization or biogenesis [GO:0071852]
MDBSrug1_07839.1	2.58907	3.17837	0.613973	0.96043	0.272981	0.0414602	0.00740014	oxidoreductase activity [GO:0016491]	integral component of membrane [GO:0016021]	oxidation-reduction process [GO:0055114]
MDBSrug1_04360.2	2.2643	2.46044	0.491105	0.801581	0.273599	0.0188284	0.00155558	nucleotide binding [GO:0000166]; nucleic acid binding [GO:0003676]
MDBSrug1_08466.1	4.39179	5.30051	1.15046	1.5346	0.277031	0.049782	0.0100495	transaminase activity [GO:0008483]; pyridoxal phosphate binding [GO:0030170]
MDBSrug1_06708.1	9.30779	10.0831	2.79314	2.59777	0.278012	0.0260373	0.00300353	phosphomannomutase activity [GO:0004615]	cytoplasm [GO:0005737]	GDP-mannose biosynthetic process [GO:0009298]
MDBSrug1_11729.1	3.73361	3.49425	0.791434	1.22502	0.278983	0.0196734	0.00170207	catalytic activity [GO:0003824]; metal ion binding [GO:0046872]		proteolysis [GO:0006508]
MDBSrug1_01666.1	0.954455	1.37154	0.473425	0.176063	0.27923	0.0937042	0.0322085			heterocycle biosynthetic process [GO:0018130]; molybdopterin cofactor metabolic process [GO:0043545]; cofactor biosynthetic process [GO:0051188]; organophosphate biosynthetic process [GO:0090407]; organic cyclic compound biosynthetic process [GO:1901362]; organonitrogen compound biosynthetic process [GO:1901566]
MDBSrug1_00988.1	3.3209	2.52186	0.755816	0.884168	0.280687	0.1123	0.0443771		integral component of membrane [GO:0016021]
MDBSrug1_12559.1	2.1198	2.55009	0.62015	0.692682	0.281127	0.0741208	0.0207977		nucleus [GO:0005634]; cytosolic ribosome [GO:0022626]	ribosomal large subunit assembly [GO:0000027]
MDBSrug1_02852.1	0.155543	0.152038	0.0570995	0.029599	0.281872	0.0747696	0.0212712	metal ion binding [GO:0046872]		regulation of transcription, DNA-templated [GO:0006355]
MDBSrug1_10577.1	10.8595	12.1696	3.60817	2.9297	0.283896	0.0200366	0.0018428	oxidoreductase activity, acting on CH-OH group of donors [GO:0016614]; flavin adenine dinucleotide binding [GO:0050660]		oxidation-reduction process [GO:0055114]
MDBSrug1_06765.1	0.926242	0.760102	0.337467	0.142477	0.284606	0.0443215	0.00825631
MDBSrug1_01311.1	23.2548	19.8429	5.68924	6.65558	0.286438	0.0537619	0.0114396
MDBSrug1_08058.1	9.27589	7.26978	2.56844	2.24922	0.291174	0.100868	0.0371866	catalytic activity [GO:0003824]		thiamine metabolic process [GO:0006772]
MDBSrug1_12278.1	0.707876	0.540899	0.1349	0.230111	0.292296	0.0669453	0.0171146	NADPH-hemoprotein reductase activity [GO:0003958]; FMN binding [GO:0010181]	integral component of membrane [GO:0016021]	oxidation-reduction process [GO:0055114]
MDBSrug1_08422.1	55.795	54.5498	17.4084	14.8924	0.292725	0.00572949	0.000156299
MDBSrug1_12131.1	9.19579	9.17871	2.46684	3.00628	0.297865	0.0264581	0.00315518	oxidoreductase activity [GO:0016491]		oxidation-reduction process [GO:0055114]
MDBSrug1_01770.1	23.4894	29.029	9.34867	6.77843	0.307075	0.0572452	0.0126716
MDBSrug1_00092.1	15.0011	12.5196	4.73129	3.76278	0.308643	0.0534158	0.0113243	phosphoenolpyruvate carboxykinase (ATP) activity [GO:0004612]; ATP binding [GO:0005524]; kinase activity [GO:0016301]	cytosol [GO:0005829]	gluconeogenesis [GO:0006094]; phosphorylation [GO:0016310]
MDBSrug1_00166.1	1.70472	2.35327	0.332655	0.929252	0.310968	0.0873906	0.0284718	proton-transporting ATPase activity, rotational mechanism [GO:0046961]	fungal-type vacuole membrane [GO:0000329]; nucleus [GO:0005634]; proton-transporting V-type ATPase, V0 domain [GO:0033179]	vacuolar transport [GO:0007034]; ATP hydrolysis coupled proton transport [GO:0015991]
MDBSrug1_12028.1	1.89824	1.77137	0.371935	0.770363	0.311286	0.0762587	0.0223486	N6-(1,2-dicarboxyethyl)AMP AMP-lyase (fumarate-forming) activity [GO:0004018]; (S)-2-(5-amino-1-(5-phospho-D-ribosyl)imidazole-4-carboxamido)succinate AMP-lyase (fumarate-forming) activity [GO:0070626]		'de novo' IMP biosynthetic process [GO:0006189]; 'de novo' AMP biosynthetic process [GO:0044208]
MDBSrug1_05493.1	0.58237	0.550603	0.207257	0.149605	0.314978	0.0165609	0.00118753		fungal-type vacuole membrane [GO:0000329]; integral component of membrane [GO:0016021]	transport [GO:0006810]; macroautophagy [GO:0016236]
MDBSrug1_09022.1;MDBSrug1_12347.1	2.37882	2.15754	0.87654	0.554713	0.315507	0.0216402	0.00220956
MDBSrug1_11641.1	2.44439	1.98435	0.778156	0.650841	0.322665	0.0785513	0.0236327	acetyl-CoA carboxylase activity [GO:0003989]; biotin carboxylase activity [GO:0004075]; ATP binding [GO:0005524]; metal ion binding [GO:0046872]		fatty acid biosynthetic process [GO:0006633]
MDBSrug1_12620.1	660.594	665.111	236.261	194.004	0.324556	0.0282895	0.00366022
MDBSrug1_08527.1;REV__MDBSrug1_09658.1	2.02158	2.51047	0.810963	0.660409	0.324659	0.0786621	0.0239113	ATP binding [GO:0005524]; ATPase activity [GO:0016887]	cytosol [GO:0005829]
MDBSrug1_05261.1	12.889	11.8492	4.37881	3.6534	0.324689	0.00868689	0.000365621	beta-N-acetylhexosaminidase activity [GO:0004563]	membrane [GO:0016020]	carbohydrate metabolic process [GO:0005975]
MDBSrug1_08132.1	48.7559	53.3005	12.484	20.7115	0.325266	0.0342684	0.00523508	calcium ion binding [GO:0005509]
MDBSrug1_08236.1	4.76997	4.07763	1.16496	1.73136	0.327356	0.0240884	0.00262851	nucleotide binding [GO:0000166]; RNA polymerase II core binding [GO:0000993]; regulatory region RNA binding [GO:0001069]; mRNA binding [GO:0003729]; poly(A) binding [GO:0008143]; eukaryotic initiation factor 4G binding [GO:0031370]; identical protein binding [GO:0042802]	nucleus [GO:0005634]; cytoplasm [GO:0005737]	mRNA splicing, via spliceosome [GO:0000398]; mRNA export from nucleus [GO:0006406]; translational termination [GO:0006415]; negative regulation of translation [GO:0017148]; positive regulation of transcription elongation from RNA polymerase II promoter [GO:0032968]; negative regulation of termination of RNA polymerase II transcription, poly(A)-coupled [GO:2000805]
MDBSrug1_02510.1	3.76799	3.02043	1.39413	0.854328	0.331219	0.0467906	0.00897154	carbamoyl-phosphate synthase (glutamine-hydrolyzing) activity [GO:0004088]; ATP binding [GO:0005524]; metal ion binding [GO:0046872]	mitochondrion [GO:0005739]	nitrogen compound metabolic process [GO:0006807]
MDBSrug1_03607.1	13.796	17.9192	6.64386	4.71153	0.358043	0.0839001	0.0265499	UTP:glucose-1-phosphate uridylyltransferase activity [GO:0003983]		UDP-glucose metabolic process [GO:0006011]
MDBSrug1_10338.1	4.51832	4.91924	1.92248	1.47014	0.35948	0.0103295	0.000491115	transferase activity [GO:0016740]	riboflavin synthase complex [GO:0009349]	riboflavin biosynthetic process [GO:0009231]
MDBSrug1_04903.1	0.569115	0.529983	0.148423	0.248096	0.360768	0.0592114	0.0136145	tryptophan synthase activity [GO:0004834]		tryptophan biosynthetic process [GO:0000162]
MDBSrug1_11630.1	2.76916	2.05726	0.719532	1.02461	0.361374	0.104786	0.0401013	transferase activity [GO:0016740]
MDBSrug1_01378.1	2.23595	2.84832	0.626586	1.21269	0.361758	0.0621495	0.0147744	threonine-type endopeptidase activity [GO:0004298]	nuclear envelope [GO:0005635]; proteasome core complex, beta-subunit complex [GO:0019774]; proteasome storage granule [GO:0034515]	proteasomal ubiquitin-independent protein catabolic process [GO:0010499]; proteasome-mediated ubiquitin-dependent protein catabolic process [GO:0043161]
MDBSrug1_09038.1	2.47877	2.68395	0.77786	1.0958	0.362922	0.0205162	0.00195088	Ran GTPase binding [GO:0008536]	cytosol [GO:0005829]; nuclear membrane [GO:0031965]; nuclear periphery [GO:0034399]	intracellular protein transport [GO:0006886]
MDBSrug1_07508.1	1.1808	1.06369	0.432629	0.383665	0.363689	0.0273889	0.00339426	magnesium ion binding [GO:0000287]; enoyl-[acyl-carrier-protein] reductase (NADH) activity [GO:0004318]; holo-[acyl-carrier-protein] synthase activity [GO:0008897]	fatty acid synthase complex [GO:0005835]	fatty acid biosynthetic process [GO:0006633]; oxidation-reduction process [GO:0055114]
MDBSrug1_01286.1	45.6546	40.5754	16.7482	14.6179	0.363748	0.0320765	0.00465022
MDBSrug1_00916.1	7.5257	8.27376	2.52957	3.23138	0.36463	0.0104179	0.000503438
MDBSrug1_02131.1	4.27235	4.29294	1.78818	1.34028	0.365248	0.0518749	0.0107955	ATP binding [GO:0005524]; heat shock protein binding [GO:0031072]; metal ion binding [GO:0046872]; unfolded protein binding [GO:0051082]		protein folding [GO:0006457]; response to heat [GO:0009408]
MDBSrug1_02135.2	5.10385	5.05549	2.28102	1.43827	0.366096	0.0819685	0.025683	hydrolase activity [GO:0016787]	integral component of membrane [GO:0016021]
MDBSrug1_03912.3	1.82438	1.99892	0.488294	0.92167	0.368782	0.0786229	0.0238381	GTPase activity [GO:0003924]; nickel cation binding [GO:0016151]		nitrogen compound metabolic process [GO:0006807]
MDBSrug1_05028.1	18.444	13.119	4.44576	7.224	0.369729	0.116102	0.0466941	DNA binding [GO:0003677]; protein heterodimerization activity [GO:0046982]	nucleosome [GO:0000786]; nucleus [GO:0005634]
MDBSrug1_06299.1	0.474304	0.534861	0.185106	0.191766	0.373449	0.0580582	0.0132136
MDBSrug1_11658.1	89.3067	90.2106	27.9217	39.6181	0.37623	0.0648323	0.015968
MDBSrug1_11647.1	32.8351	31.3597	13.5799	10.6856	0.377998	0.0178869	0.00140808		integral component of membrane [GO:0016021]
MDBSrug1_09201.1	3.12682	3.24633	0.99767	1.42177	0.379631	0.0518565	0.0107512		U2 snRNP [GO:0005686]; cytosol [GO:0005829]; viral nucleocapsid [GO:0019013]; U2-type prespliceosome [GO:0071004]	mRNA splicing, via spliceosome [GO:0000398]
MDBSrug1_07477.1	3.35004	4.25043	0.931797	1.96238	0.380789	0.0770587	0.0227633	DNA binding [GO:0003677]; DNA polymerase processivity factor activity [GO:0030337]	nucleus [GO:0005634]; cytosol [GO:0005829]; PCNA complex [GO:0043626]	DNA strand elongation involved in DNA replication [GO:0006271]; postreplication repair [GO:0006301]; UV-damage excision repair [GO:0070914]; positive regulation of DNA-directed DNA polymerase activity [GO:1900264]
MDBSrug1_06555.1	89.1827	77.6779	38.3548	25.9331	0.38528	0.026547	0.00318647	alditol:NADP+ 1-oxidoreductase activity [GO:0004032]; methylglyoxal reductase (NADH-dependent) activity [GO:0019170]; D-xylulose reductase activity [GO:0046526]	extracellular region [GO:0005576]	xylulose metabolic process [GO:0005997]; galactose metabolic process [GO:0006012]; methylglyoxal metabolic process [GO:0009438]; tetrose metabolic process [GO:0033347]; D-xylose catabolic process [GO:0042843]; oxidation-reduction process [GO:0055114]
MDBSrug1_01780.1	0.602254	0.628571	0.262814	0.21224	0.385964	0.0154038	0.00103252
MDBSrug1_04080.1	2.8836	3.18583	1.00407	1.33866	0.385988	0.0147632	0.000943555
MDBSrug1_01932.1	345.594	332.368	134.723	127.294	0.386477	0.00425743	8.29585e-05
MDBSrug1_08468.1	1.57415	1.3255	0.588231	0.535779	0.387637	0.0775571	0.0230314		integral component of membrane [GO:0016021]
MDBSrug1_07260.1	3.51634	3.21639	1.09232	1.52577	0.388859	0.0221297	0.00229404	transcription cofactor activity [GO:0003712]; protein kinase activity [GO:0004672]; ATP binding [GO:0005524]	cytosol [GO:0005829]; RISC complex [GO:0016442]	protein phosphorylation [GO:0006468]; posttranscriptional gene silencing by RNA [GO:0035194]; regulation of nucleic acid-templated transcription [GO:1903506]
MDBSrug1_01876.1	9.90076	10.2254	3.35999	4.63288	0.397139	0.0530086	0.0111967	zinc ion binding [GO:0008270]; oxidoreductase activity [GO:0016491]		oxidation-reduction process [GO:0055114]
MDBSrug1_07694.1	1.21624	1.3848	0.494323	0.540807	0.397967	0.0526342	0.0110766		integral component of membrane [GO:0016021]	vesicle-mediated transport [GO:0016192]
MDBSrug1_04911.1	2.55487	2.01645	0.815882	1.01168	0.399788	0.0928071	0.0316832	transferase activity, transferring glycosyl groups [GO:0016757]	membrane [GO:0016020]; intracellular membrane-bounded organelle [GO:0043231]
MDBSrug1_12200.1	2.6988	2.61246	0.873766	1.26057	0.401851	0.0656253	0.0164703	1-pyrroline-5-carboxylate dehydrogenase activity [GO:0003842]; aldehyde dehydrogenase (NAD) activity [GO:0004029]		oxidation-reduction process [GO:0055114]
MDBSrug1_01698.1	1.35514	1.02362	0.303932	0.654652	0.402976	0.0990494	0.0356671	transferase activity [GO:0016740]	oligosaccharyltransferase complex [GO:0008250]; integral component of membrane [GO:0016021]	protein N-linked glycosylation [GO:0006487]
MDBSrug1_01447.1	2.23935	2.22425	1.10497	0.705737	0.40566	0.0946916	0.0328431	phosphatidylinositol binding [GO:0035091]	nucleus [GO:0005634]; cytosol [GO:0005829]
MDBSrug1_09556.1	0.469696	0.517604	0.204542	0.199635	0.409376	0.0499882	0.0101301	G-protein coupled receptor binding [GO:0001664]; GTPase activity [GO:0003924]; signal transducer activity [GO:0004871]; GTP binding [GO:0005525]; G-protein beta/gamma-subunit complex binding [GO:0031683]	heterotrimeric G-protein complex [GO:0005834]	G-protein coupled receptor signaling pathway [GO:0007186]; small GTPase mediated signal transduction [GO:0007264]
MDBSrug1_04167.1	5.19104	4.83449	1.98739	2.12439	0.41013	0.0201656	0.0018861	chorismate synthase activity [GO:0004107]; riboflavin reductase (NADPH) activity [GO:0042602]	nucleus [GO:0005634]; cytosol [GO:0005829]	aromatic amino acid family biosynthetic process [GO:0009073]; chorismate biosynthetic process [GO:0009423]; oxidation-reduction process [GO:0055114]
MDBSrug1_02955.1	0.924541	0.922254	0.461368	0.306982	0.416045	0.0904607	0.0302476	dolichyl-diphosphooligosaccharide-protein glycotransferase activity [GO:0004579]; identical protein binding [GO:0042802]	oligosaccharyltransferase complex [GO:0008250]; integral component of membrane [GO:0016021]	protein N-linked glycosylation via asparagine [GO:0018279]
MDBSrug1_10266.1	3.39179	2.83694	1.08758	1.5093	0.416921	0.0402999	0.00694175	hydrolase activity, hydrolyzing O-glycosyl compounds [GO:0004553]	integral component of membrane [GO:0016021]	carbohydrate metabolic process [GO:0005975]
MDBSrug1_01323.1	10.9843	13.3534	5.96516	4.27853	0.420898	0.0487674	0.00965465	nucleic acid binding [GO:0003676]; ATP-dependent RNA helicase activity [GO:0004004]; ATP binding [GO:0005524]	transcription export complex [GO:0000346]; chromosome, telomeric region [GO:0000781]	mRNA splicing, via spliceosome [GO:0000398]; transcription-coupled nucleotide-excision repair [GO:0006283]; chromatin silencing at telomere [GO:0006348]; transcription elongation from RNA polymerase II promoter [GO:0006368]; mRNA export from nucleus [GO:0006406]; mRNA 3'-end processing [GO:0031124]
MDBSrug1_07240.1	2.87024	2.77166	1.21807	1.16886	0.423073	0.00513612	0.000116093	arginine-tRNA ligase activity [GO:0004814]; ATP binding [GO:0005524]	cytoplasm [GO:0005737]	arginyl-tRNA aminoacylation [GO:0006420]
MDBSrug1_11200.1	0.285316	0.375378	0.15822	0.123243	0.426012	0.113605	0.04507	ATP binding [GO:0005524]
MDBSrug1_09761.2	1.56543	1.3786	0.735252	0.522725	0.427298	0.0280815	0.00356764	oxidoreductase activity [GO:0016491]		oxidation-reduction process [GO:0055114]
MDBSrug1_12044.1	1.31155	1.69431	0.514406	0.776201	0.429364	0.079329	0.0241759
MDBSrug1_06749.1	4.1086	3.3066	1.62514	1.56611	0.430366	0.117853	0.0477656	nucleotide binding [GO:0000166]; IMP dehydrogenase activity [GO:0003938]; metal ion binding [GO:0046872]	cytoplasm [GO:0005737]	GMP biosynthetic process [GO:0006177]; oxidation-reduction process [GO:0055114]
MDBSrug1_02293.1	8.54718	7.28856	3.95828	2.91445	0.434001	0.0341223	0.00515957	threonine-type endopeptidase activity [GO:0004298]	nucleus [GO:0005634]; cytosol [GO:0005829]; proteasome core complex, alpha-subunit complex [GO:0019773]	proteasomal ubiquitin-independent protein catabolic process [GO:0010499]; proteasome-mediated ubiquitin-dependent protein catabolic process [GO:0043161]
MDBSrug1_10915.1	8.25689	9.69664	3.74006	4.14028	0.43893	0.0724004	0.01992	phosphatidylcholine transporter activity [GO:0008525]; phosphatidylinositol transporter activity [GO:0008526]	nucleus [GO:0005634]; cell division site [GO:0032153]; growing cell tip [GO:0035838]; cell pole [GO:0060187]	regulation of filamentous growth [GO:0010570]; phospholipid transport [GO:0015914]; Golgi vesicle transport [GO:0048193]
MDBSrug1_06444.1	0.459205	0.534604	0.254274	0.18223	0.439223	0.033426	0.00500218	DNA binding [GO:0003677]	nuclear chromatin [GO:0000790]; cytosol [GO:0005829]; replication fork protection complex [GO:0031298]; chromosome, centromeric outer repeat region [GO:0034507]; FACT complex [GO:0035101]	mitotic sister chromatid segregation [GO:0000070]; DNA-dependent DNA replication [GO:0006261]; chromatin silencing at silent mating-type cassette [GO:0030466]; cellular protein localization [GO:0034613]; DNA replication-independent nucleosome organization [GO:0034724]; positive regulation of RNA polymerase II transcriptional preinitiation complex assembly [GO:0045899]; chromatin silencing at cent…
MDBSrug1_12687.1	20.4282	24.4308	10.2966	9.42429	0.43962	0.0882894	0.0290398	succinate dehydrogenase activity [GO:0000104]; heme binding [GO:0020037]; metal ion binding [GO:0046872]		oxidation-reduction process [GO:0055114]
MDBSrug1_04134.2	16.8923	16.2481	6.21889	8.46625	0.443118	0.0594743	0.0137676	glutamine-fructose-6-phosphate transaminase (isomerizing) activity [GO:0004360]; carbohydrate binding [GO:0030246]		carbohydrate metabolic process [GO:0005975]; carbohydrate derivative biosynthetic process [GO:1901137]
MDBSrug1_02600.1	3.8247	3.58964	2.08344	1.20381	0.443364	0.11477	0.0458006	ATP binding [GO:0005524]; ligase activity [GO:0016874]
MDBSrug1_02988.1	0.751471	0.610985	0.203229	0.403252	0.445138	0.103606	0.0390036	translation initiation factor activity [GO:0003743]	eukaryotic translation initiation factor 3 complex [GO:0005852]; eukaryotic 43S preinitiation complex [GO:0016282]; eukaryotic 48S preinitiation complex [GO:0033290]	formation of translation preinitiation complex [GO:0001731]; regulation of translational initiation [GO:0006446]
MDBSrug1_01151.1	9.31594	9.11497	4.13581	4.08514	0.446042	0.00812562	0.000316665	peptidase activity [GO:0008233]; metal ion binding [GO:0046872]		proteolysis [GO:0006508]
MDBSrug1_00712.1;MDBSrug1_10589.1;MDBSrug1_07909.1	7.47537	8.83096	3.02042	4.36246	0.452761	0.0427933	0.00780486		integral component of membrane [GO:0016021]
MDBSrug1_05928.1	18.566	18.7291	8.50686	8.40138	0.453364	0.000291596	2.27276e-07	sphingomyelin phosphodiesterase activity [GO:0004767]; hydrolase activity, acting on glycosyl bonds [GO:0016798]		sphingomyelin catabolic process [GO:0006685]
MDBSrug1_01641.1	10.8489	8.31019	5.57125	3.13035	0.454177	0.0973448	0.0345221	structural molecule activity [GO:0005198]; K48-linked polyubiquitin binding [GO:0036435]	nucleus [GO:0005634]; cytosol [GO:0005829]; proteasome regulatory particle, base subcomplex [GO:0008540]	ubiquitin-dependent protein catabolic process [GO:0006511]
MDBSrug1_03568.1	74.6899	76.6875	37.6854	31.9951	0.46031	0.026568	0.00320969	alpha,alpha-trehalose phosphorylase (configuration-retaining) activity [GO:0033832]		trehalose metabolic process [GO:0005991]; glucose metabolic process [GO:0006006]; glucose 6-phosphate metabolic process [GO:0051156]
MDBSrug1_04733.1	21.2749	19.4684	11.0119	7.87918	0.463662	0.0435047	0.00803634	catalytic activity [GO:0003824]	intrinsic component of membrane [GO:0031224]
MDBSrug1_10305.1	6.59247	6.92772	2.53556	3.73874	0.464069	0.0857042	0.0275215	nucleotide binding [GO:0000166]; nucleic acid binding [GO:0003676]
MDBSrug1_00639.1	3.44063	3.82237	1.41562	1.97884	0.467362	0.0392185	0.00663322	ATP binding [GO:0005524]; unfolded protein binding [GO:0051082]	nucleus [GO:0005634]; chaperonin-containing T-complex [GO:0005832]	protein folding [GO:0006457]
MDBSrug1_05858.1	3.58581	3.76261	1.37537	2.1072	0.473921	0.103641	0.0390977	transferase activity [GO:0016740]
MDBSrug1_05414.1	0.365528	0.462925	0.239109	0.155751	0.476624	0.0799637	0.0245563	GTPase activity [GO:0003924]; GTP binding [GO:0005525]; protein homodimerization activity [GO:0042803]	mitochondrial outer membrane [GO:0005741]; peroxisome [GO:0005777]; cell division site [GO:0032153]	mitochondrion inheritance [GO:0000001]; chronological cell aging [GO:0001300]; peroxisome fission [GO:0016559]; establishment of mitochondrion localization, microtubule-mediated [GO:0034643]; protein homooligomerization [GO:0051260]; mitochondrial membrane fission [GO:0090149]
MDBSrug1_09840.1	40.8131	46.7604	19.9197	21.9996	0.478676	0.0575785	0.0129698	aspartic-type endopeptidase activity [GO:0004190]	fungal-type vacuole [GO:0000324]	cellular response to starvation [GO:0009267]; lysosomal microautophagy [GO:0016237]; proteolysis involved in cellular protein catabolic process [GO:0051603]
MDBSrug1_01214.1	18.7761	20.1377	10.4135	8.27569	0.480271	0.0241729	0.00267541	GTP binding [GO:0005525]	intracellular [GO:0005622]	small GTPase mediated signal transduction [GO:0007264]
MDBSrug1_01908.1	2.79209	3.05635	1.54044	1.3014	0.485915	0.0141728	0.000894776
MDBSrug1_05712.1	51.1555	43.8924	23.1106	23.0805	0.485976	0.0939465	0.0323651	glutamate-ammonia ligase activity [GO:0004356]; ATP binding [GO:0005524]	nucleus [GO:0005634]; cytosol [GO:0005829]	glutamine biosynthetic process [GO:0006542]; cellular response to nitrogen starvation [GO:0006995]; ammonia assimilation cycle [GO:0019676]
MDBSrug1_11280.1	6.62366	6.24132	2.96279	3.30517	0.487211	0.00627867	0.000181068	uracil phosphoribosyltransferase activity [GO:0004845]		pyrimidine-containing compound salvage [GO:0008655]
MDBSrug1_09224.1	3.69887	4.30609	1.90398	1.99797	0.487442	0.0872096	0.0282768	methylmalonate-semialdehyde dehydrogenase (acylating) activity [GO:0004491]		oxidation-reduction process [GO:0055114]
MDBSrug1_04667.1	4.60445	4.75367	2.12305	2.45372	0.48907	0.0198178	0.00176089	gamma-glutamyltransferase activity [GO:0003840]		glutathione metabolic process [GO:0006749]
MDBSrug1_06329.1	1.71014	1.7288	0.8029	0.888992	0.49198	0.0247518	0.00279736		protein phosphatase type 2A complex [GO:0000159]; fungal-type vacuole membrane [GO:0000329]; nucleus [GO:0005634]; cytosol [GO:0005829]; cellular bud tip [GO:0005934]; cellular bud neck [GO:0005935]; mating projection tip [GO:0043332]; mitotic spindle [GO:0072686]	negative regulation of exit from mitosis [GO:0001100]; positive regulation of G2/M transition of mitotic cell cycle [GO:0010971]; negative regulation of septation initiation signaling [GO:0031030]; regulation of protein phosphatase type 2A activity [GO:0034047]; negative regulation of GTPase activity [GO:0034260]; positive regulation of transcription by transcription factor localization [GO:00615…
MDBSrug1_09926.1	4.61438	4.55088	2.64989	1.87144	0.493311	0.103835	0.0395754	transferase activity [GO:0016740]	nucleus [GO:0005634]; cytosol [GO:0005829]
MDBSrug1_00959.1	3.28436	4.20643	1.61911	2.08072	0.493918	0.103773	0.0392283	ATP binding [GO:0005524]; unfolded protein binding [GO:0051082]	nucleus [GO:0005634]; chaperonin-containing T-complex [GO:0005832]	protein folding [GO:0006457]
MDBSrug1_11528.1	1.58964	1.53625	0.639457	0.904804	0.494023	0.0950635	0.0331203	ATP binding [GO:0005524]; unfolded protein binding [GO:0051082]	chaperonin-containing T-complex [GO:0005832]	protein folding [GO:0006457]
MDBSrug1_02085.1;MDBSrug1_00242.1	7.60367	8.11781	4.01228	3.76477	0.494676	0.0164897	0.00116958	ATP binding [GO:0005524]; hydrogen-exporting ATPase activity, phosphorylative mechanism [GO:0008553]; metal ion binding [GO:0046872]	integral component of membrane [GO:0016021]	ATP biosynthetic process [GO:0006754]; hydrogen ion transmembrane transport [GO:1902600]
MDBSrug1_01283.1	4.46941	3.83608	1.66749	2.46617	0.497702	0.0596896	0.0139105	N2-acetyl-L-ornithine:2-oxoglutarate 5-aminotransferase activity [GO:0003992]; pyridoxal phosphate binding [GO:0030170]
MDBSrug1_08342.1	1089.25	1502.05	NaN	NaN
MDBSrug1_06252.1	353.711	364.849	NaN	NaN
MDBSrug1_06967.1;MDBSrug1_00483.1	154.881	169.186	NaN	NaN
MDBSrug1_00124.1	139.792	170.307	NaN	NaN
MDBSrug1_11396.1	68.8275	65.6232	NaN	NaN				binding [GO:0005488]; oxidoreductase activity [GO:0016491]		response to stimulus [GO:0050896]
MDBSrug1_10381.1	59.715	74.0011	NaN	NaN
MDBSrug1_03905.1;MDBSrug1_04983.1	55.0968	55.4525	NaN	NaN
MDBSrug1_05845.1	52.3428	37.403	NaN	NaN
MDBSrug1_08291.1	46.959	45.3859	NaN	NaN				aspartic-type endopeptidase activity [GO:0004190]		proteolysis [GO:0006508]
MDBSrug1_01898.1;MDBSrug1_09288.1	43.1842	44.6323	NaN	NaN				xylan 1,4-beta-xylosidase activity [GO:0009044]		carbohydrate metabolic process [GO:0005975]
MDBSrug1_02428.1	40.0333	29.9664	NaN	NaN				glucan exo-1,3-beta-glucosidase activity [GO:0004338]		metabolic process [GO:0008152]
MDBSrug1_07054.2	37.7366	51.7177	NaN	NaN
MDBSrug1_08997.1;MDBSrug1_06795.1	34.2266	37.3973	NaN	NaN
MDBSrug1_12514.1	24.4843	22.8571	NaN	NaN
MDBSrug1_00041.1	24.2068	23.6295	NaN	NaN				beta-N-acetylhexosaminidase activity [GO:0004563]	membrane [GO:0016020]	carbohydrate metabolic process [GO:0005975]
MDBSrug1_03584.1	23.7109	13.5077	NaN	NaN
MDBSrug1_03453.1	22.9489	21.8429	NaN	NaN				catalytic activity [GO:0003824]
MDBSrug1_07408.1	22.7065	23.2077	NaN	NaN
MDBSrug1_06071.1	22.6132	22.7957	NaN	NaN				raffinose alpha-galactosidase activity [GO:0052692]		carbohydrate metabolic process [GO:0005975]
MDBSrug1_06318.1	22.5856	49.9345	NaN	NaN				chitinase activity [GO:0004568]		carbohydrate metabolic process [GO:0005975]; chitin catabolic process [GO:0006032]
MDBSrug1_04262.1	22.5838	13.2578	NaN	NaN				copper ion binding [GO:0005507]; hydroquinone:oxygen oxidoreductase activity [GO:0052716]		oxidation-reduction process [GO:0055114]
MDBSrug1_05886.1	21.22	13.4172	NaN	NaN
MDBSrug1_07012.1	19.3812	14.7837	NaN	NaN
MDBSrug1_04677.1	19.3677	17.247	NaN	NaN				hydrolase activity [GO:0016787]
MDBSrug1_04089.1	18.3919	10.6067	NaN	NaN
MDBSrug1_10190.1	15.4133	0.0616335	NaN	NaN				serine-type carboxypeptidase activity [GO:0004185]	extracellular region [GO:0005576]; nucleus [GO:0005634]; cytosol [GO:0005829]	negative regulation of induction of conjugation with cellular fusion [GO:0010515]; proteolysis involved in cellular protein catabolic process [GO:0051603]; negative regulation of pheromone-dependent signal transduction involved in conjugation with cellular fusion [GO:0090029]
MDBSrug1_02482.1	14.2833	14.214	NaN	NaN				phosphatidylserine decarboxylase activity [GO:0004609]		phospholipid biosynthetic process [GO:0008654]
MDBSrug1_04243.1	13.2257	18.4633	NaN	NaN
MDBSrug1_11441.1	12.7635	13.1559	NaN	NaN
MDBSrug1_11063.1	12.6983	9.91747	NaN	NaN				hydrolase activity, acting on carbon-nitrogen (but not peptide) bonds, in linear amides [GO:0016811]
MDBSrug1_07244.1	12.5704	17.3887	NaN	NaN				glucan exo-1,3-beta-glucosidase activity [GO:0004338]		metabolic process [GO:0008152]
MDBSrug1_04846.1;MDBSrug1_11859.1	12.5101	14.1605	NaN	NaN
MDBSrug1_02507.1	12.4378	14.2373	NaN	NaN
MDBSrug1_11262.1	12.296	12.4098	NaN	NaN				binding [GO:0005488]; oxidoreductase activity [GO:0016491]		response to stimulus [GO:0050896]
MDBSrug1_02803.1	11.5081	12.794	NaN	NaN				acid phosphatase activity [GO:0003993]		dephosphorylation [GO:0016311]
MDBSrug1_05271.1	10.0262	7.26636	NaN	NaN
MDBSrug1_06918.1	9.9798	9.20546	NaN	NaN				aspartic-type endopeptidase activity [GO:0004190]		proteolysis [GO:0006508]
MDBSrug1_08246.1	9.66506	10.6175	NaN	NaN
MDBSrug1_06859.1	9.65655	44.1884	NaN	NaN						response to stress [GO:0006950]
MDBSrug1_06819.1	8.94698	6.0757	NaN	NaN
MDBSrug1_01707.1	8.69001	8.00342	NaN	NaN
MDBSrug1_09203.1	8.57624	7.77462	NaN	NaN				identical protein binding [GO:0042802]
MDBSrug1_09798.1	8.37279	7.49345	NaN	NaN				hydrolase activity [GO:0016787]; carbohydrate binding [GO:0030246]		carbohydrate metabolic process [GO:0005975]
MDBSrug1_01224.1;MDBSrug1_07157.1	7.38995	10.0256	NaN	NaN
MDBSrug1_06441.1	7.00822	4.70228	NaN	NaN
MDBSrug1_02186.1	6.93875	13.1394	NaN	NaN
MDBSrug1_07629.1	6.79414	6.31246	NaN	NaN				glucosamine 6-phosphate N-acetyltransferase activity [GO:0004343]	nucleus [GO:0005634]; cytoplasm [GO:0005737]	UDP-N-acetylglucosamine biosynthetic process [GO:0006048]
MDBSrug1_11941.1	6.00659	8.25498	NaN	NaN
MDBSrug1_06870.1	5.85525	5.74331	NaN	NaN
MDBSrug1_00354.1	5.62203	10.0734	NaN	NaN
MDBSrug1_07516.1	5.33742	3.8642	NaN	NaN				phosphoric diester hydrolase activity [GO:0008081]	membrane [GO:0016020]	lipid metabolic process [GO:0006629]
MDBSrug1_09618.1	5.2917	5.03307	NaN	NaN					membrane [GO:0016020]
MDBSrug1_10609.1	5.11874	5.78429	NaN	NaN				hydrolase activity [GO:0016787]; carbohydrate binding [GO:0030246]		carbohydrate metabolic process [GO:0005975]
MDBSrug1_06230.1	5.03934	4.08389	NaN	NaN					membrane [GO:0016020]
MDBSrug1_11295.1	4.99894	4.04673	NaN	NaN
MDBSrug1_09323.1	4.99823	5.3617	NaN	NaN
MDBSrug1_11734.1	4.96066	3.87684	NaN	NaN				cytidine deaminase activity [GO:0004126]; zinc ion binding [GO:0008270]		cytidine deamination [GO:0009972]
MDBSrug1_02534.1	4.92025	5.49624	NaN	NaN				hydrolase activity [GO:0016787]		carbohydrate metabolic process [GO:0005975]
MDBSrug1_04209.1;MDBSrug1_05924.1	4.84795	5.66278	NaN	NaN
MDBSrug1_00443.1	4.79124	5.06153	NaN	NaN
MDBSrug1_12284.1;MDBSrug1_07133.1	4.67144	4.69015	NaN	NaN
MDBSrug1_02798.1	4.59169	5.14878	NaN	NaN				glutamate dehydrogenase (NAD+) activity [GO:0004352]	mitochondrion [GO:0005739]; cytosol [GO:0005829]	glutamate catabolic process to 2-oxoglutarate [GO:0019551]; oxidation-reduction process [GO:0055114]
MDBSrug1_00677.1	4.08024	3.9066	NaN	NaN
MDBSrug1_06342.1	4.0012	3.11781	NaN	NaN				catalytic activity [GO:0003824]
MDBSrug1_05108.1	3.98632	3.0346	NaN	NaN					membrane [GO:0016020]	transport [GO:0006810]
MDBSrug1_05760.1	3.93989	5.89641	NaN	NaN
MDBSrug1_02657.1	3.9367	2.33455	NaN	NaN				lysozyme activity [GO:0003796]		carbohydrate metabolic process [GO:0005975]; peptidoglycan catabolic process [GO:0009253]; cell wall macromolecule catabolic process [GO:0016998]
MDBSrug1_09659.1	3.86617	5.28105	NaN	NaN					integral component of membrane [GO:0016021]
MDBSrug1_04539.1	3.7127	3.51201	NaN	NaN				oxidoreductase activity [GO:0016491]; metal ion binding [GO:0046872]		oxidation-reduction process [GO:0055114]
MDBSrug1_08348.1	3.54505	3.88566	NaN	NaN				oxidoreductase activity, acting on CH-OH group of donors [GO:0016614]; flavin adenine dinucleotide binding [GO:0050660]		oxidation-reduction process [GO:0055114]
MDBSrug1_09748.1	3.35808	0.885999	NaN	NaN
MDBSrug1_01421.1	3.34905	3.27114	NaN	NaN				hydrolase activity [GO:0016787]
MDBSrug1_06160.1	3.33785	1.98423	NaN	NaN				riboflavin synthase activity [GO:0004746]; oxidoreductase activity [GO:0016491]	nucleus [GO:0005634]; cytosol [GO:0005829]	riboflavin biosynthetic process [GO:0009231]; oxidation-reduction process [GO:0055114]
MDBSrug1_05086.1	3.31814	2.10575	NaN	NaN				D-serine ammonia-lyase activity [GO:0008721]	nucleus [GO:0005634]; cytosol [GO:0005829]	D-serine metabolic process [GO:0070178]
MDBSrug1_12097.1;MDBSrug1_10442.1	3.26349	2.51924	NaN	NaN				FMN binding [GO:0010181]; oxidoreductase activity [GO:0016491]		negative regulation of transcription, DNA-templated [GO:0045892]; oxidation-reduction process [GO:0055114]
MDBSrug1_07287.1	3.06841	4.0868	NaN	NaN				gamma-glutamylcyclotransferase activity [GO:0003839]		glutathione biosynthetic process [GO:0006750]
MDBSrug1_11803.1	3.02665	2.92186	NaN	NaN
MDBSrug1_10792.1	3.02364	1.66283	NaN	NaN
MDBSrug1_03817.1	3.00535	1.94069	NaN	NaN				guanylate kinase activity [GO:0004385]		phosphorylation [GO:0016310]; GMP metabolic process [GO:0046037]; GDP metabolic process [GO:0046710]
MDBSrug1_01454.1	2.91848	1.82686	NaN	NaN
MDBSrug1_02862.1	2.79106	3.65316	NaN	NaN				GTPase activity [GO:0003924]; GTP binding [GO:0005525]	nucleus [GO:0005634]; cytosol [GO:0005829]; site of polarized growth [GO:0030427]; cell division site [GO:0032153]; cell tip [GO:0051286]	small GTPase mediated signal transduction [GO:0007264]; establishment or maintenance of actin cytoskeleton polarity [GO:0030950]; regulation of alpha-glucan biosynthetic process [GO:0032949]; establishment or maintenance of cell polarity regulating cell shape [GO:0071963]
MDBSrug1_04340.1	2.71791	3.81548	NaN	NaN
MDBSrug1_12591.1	2.67084	2.06187	NaN	NaN
MDBSrug1_06163.1	2.61416	2.65168	NaN	NaN
MDBSrug1_08302.1	2.53073	2.74969	NaN	NaN				peroxiredoxin activity [GO:0051920]		oxidation-reduction process [GO:0055114]; cellular oxidant detoxification [GO:0098869]
MDBSrug1_11959.1	2.50854	4.15544	NaN	NaN
MDBSrug1_06499.1	2.44368	4.07029	NaN	NaN				monophenol monooxygenase activity [GO:0004503]; copper ion binding [GO:0005507]		oxidation-reduction process [GO:0055114]
MDBSrug1_08582.1	2.43415	2.53221	NaN	NaN				chitinase activity [GO:0004568]		carbohydrate metabolic process [GO:0005975]; chitin catabolic process [GO:0006032]
MDBSrug1_00318.1	2.37024	2.34861	NaN	NaN				hydrolase activity [GO:0016787]		carbohydrate metabolic process [GO:0005975]
MDBSrug1_09116.1	2.31506	1.72954	NaN	NaN				damaged DNA binding [GO:0003684]; aspartic-type endopeptidase activity [GO:0004190]; ubiquitin binding [GO:0043130]		nucleotide-excision repair [GO:0006289]; proteasome-mediated ubiquitin-dependent protein catabolic process [GO:0043161]
MDBSrug1_08106.1	2.27486	2.05168	NaN	NaN
MDBSrug1_09273.1	2.19862	1.32516	NaN	NaN
MDBSrug1_02419.1	2.1847	1.72686	NaN	NaN				catalytic activity [GO:0003824]		metabolic process [GO:0008152]
MDBSrug1_06373.1	2.14036	2.08059	NaN	NaN
MDBSrug1_01907.1	2.04324	1.32686	NaN	NaN				hydrogen ion transmembrane transporter activity [GO:0015078]	fungal-type vacuole [GO:0000324]; vacuolar membrane [GO:0005774]; endoplasmic reticulum [GO:0005783]; integral component of membrane [GO:0016021]; proton-transporting V-type ATPase, V0 domain [GO:0033179]	ATP hydrolysis coupled proton transport [GO:0015991]
MDBSrug1_01141.1	2.04012	2.2609	NaN	NaN
MDBSrug1_10147.1	2.03371	2.93865	NaN	NaN				lyase activity [GO:0016829]		metabolic process [GO:0008152]
MDBSrug1_05529.1	2.03257	2.32607	NaN	NaN				carbonate dehydratase activity [GO:0004089]; zinc ion binding [GO:0008270]
MDBSrug1_11685.1	2.00773	2.00085	NaN	NaN				oxidoreductase activity [GO:0016491]		oxidation-reduction process [GO:0055114]
MDBSrug1_10263.1	1.95747	0.955322	NaN	NaN				ATP binding [GO:0005524]; acid-amino acid ligase activity [GO:0016881]; NEDD8 activating enzyme activity [GO:0019781]		protein neddylation [GO:0045116]
MDBSrug1_12098.1	1.91827	10.7832	NaN	NaN
MDBSrug1_04389.2	1.90618	1.74935	NaN	NaN				glucosamine-6-phosphate deaminase activity [GO:0004342]; hydrolase activity [GO:0016787]		carbohydrate metabolic process [GO:0005975]; N-acetylglucosamine metabolic process [GO:0006044]
MDBSrug1_09418.1	1.88268	3.40017	NaN	NaN					membrane [GO:0016020]; cell part [GO:0044464]	single-organism cellular process [GO:0044763]
MDBSrug1_10863.1;MDBSrug1_01320.1	1.82399	1.74434	NaN	NaN				methyltransferase activity [GO:0008168]
MDBSrug1_02286.1	1.80127	1.12493	NaN	NaN				O-phospho-L-serine:2-oxoglutarate aminotransferase activity [GO:0004648]	cytosol [GO:0005829]	L-serine biosynthetic process [GO:0006564]; purine nucleobase biosynthetic process [GO:0009113]
MDBSrug1_00585.1	1.75576	1.76113	NaN	NaN				metal ion binding [GO:0046872]; metalloaminopeptidase activity [GO:0070006]		proteolysis [GO:0006508]; protein initiator methionine removal [GO:0070084]
MDBSrug1_01678.1	1.7391	0.541093	NaN	NaN				nucleic acid binding [GO:0003676]; endonuclease activity [GO:0004519]		DNA catabolic process [GO:0006308]; nucleic acid phosphodiester bond hydrolysis [GO:0090305]
MDBSrug1_09496.1	1.6926	2.63717	NaN	NaN
MDBSrug1_10265.1	1.67949	1.09249	NaN	NaN				aldehyde dehydrogenase (NAD) activity [GO:0004029]		oxidation-reduction process [GO:0055114]
MDBSrug1_06994.1	1.67495	1.51981	NaN	NaN				hydrolase activity, hydrolyzing O-glycosyl compounds [GO:0004553]	integral component of membrane [GO:0016021]	carbohydrate metabolic process [GO:0005975]
MDBSrug1_08703.1	1.63667	1.89704	NaN	NaN						RNA processing [GO:0006396]
MDBSrug1_03550.1	1.50365	0.221241	NaN	NaN				imidazoleglycerol-phosphate dehydratase activity [GO:0004424]	nucleus [GO:0005634]; cytosol [GO:0005829]	histidine biosynthetic process [GO:0000105]
MDBSrug1_06050.1	1.4715	1.03358	NaN	NaN
MDBSrug1_05037.1	1.47111	1.54064	NaN	NaN
MDBSrug1_05503.1	1.44694	3.14405	NaN	NaN					mitochondrion [GO:0005739]; integral component of membrane [GO:0016021]
MDBSrug1_05315.1;MDBSrug1_08642.1	1.44049	0.768241	NaN	NaN				hydrolase activity [GO:0016787]
MDBSrug1_11721.1	1.41628	1.64479	NaN	NaN				beta-glucosidase activity [GO:0008422]; scopolin beta-glucosidase activity [GO:0102483]		cellulose catabolic process [GO:0030245]
MDBSrug1_09334.1	1.37223	1.09391	NaN	NaN
MDBSrug1_08636.1	1.36106	2.2683	NaN	NaN				hydrolase activity, hydrolyzing O-glycosyl compounds [GO:0004553]		carbohydrate metabolic process [GO:0005975]
MDBSrug1_03616.1	1.36099	1.1078	NaN	NaN				oxidoreductase activity [GO:0016491]		oxidation-reduction process [GO:0055114]
MDBSrug1_10939.1	1.35642	1.35606	NaN	NaN
MDBSrug1_04412.1	1.34047	1.44081	NaN	NaN
MDBSrug1_05953.1	1.2894	2.08441	NaN	NaN				DNA binding [GO:0003677]	nucleus [GO:0005634]	DNA replication [GO:0006260]; DNA repair [GO:0006281]; DNA recombination [GO:0006310]
MDBSrug1_04142.1	1.26894	1.08275	NaN	NaN				ferroxidase activity [GO:0004322]; copper ion binding [GO:0005507]; hydroquinone:oxygen oxidoreductase activity [GO:0052716]	integral component of membrane [GO:0016021]	oxidation-reduction process [GO:0055114]
MDBSrug1_11575.1	1.25565	1.49693	NaN	NaN				O-methyltransferase activity [GO:0008171]		methylation [GO:0032259]
MDBSrug1_08434.1;MDBSrug1_07538.1	1.24842	0.7572	NaN	NaN				RNA polymerase II transcription cofactor activity [GO:0001104]; catalase activity [GO:0004096]; heme binding [GO:0020037]; metal ion binding [GO:0046872]	mediator complex [GO:0016592]	regulation of transcription from RNA polymerase II promoter [GO:0006357]; response to oxidative stress [GO:0006979]; hydrogen peroxide catabolic process [GO:0042744]; oxidation-reduction process [GO:0055114]; cellular oxidant detoxification [GO:0098869]
MDBSrug1_08358.1	1.24495	0.330746	NaN	NaN				hydrolase activity, hydrolyzing O-glycosyl compounds [GO:0004553]	integral component of membrane [GO:0016021]; cell part [GO:0044464]	cellular process [GO:0009987]; glucan metabolic process [GO:0044042]
MDBSrug1_12644.1	1.23315	1.21873	NaN	NaN				oxidoreductase activity [GO:0016491]		oxidation-reduction process [GO:0055114]
MDBSrug1_03820.1	1.23205	1.24667	NaN	NaN
MDBSrug1_06165.1	1.21748	0.764257	NaN	NaN				GTP binding [GO:0005525]	intracellular [GO:0005622]	small GTPase mediated signal transduction [GO:0007264]
MDBSrug1_05307.1	1.20118	1.07706	NaN	NaN				nitronate monooxygenase activity [GO:0018580]; dioxygenase activity [GO:0051213]		oxidation-reduction process [GO:0055114]
MDBSrug1_06068.1	1.19997	1.73415	NaN	NaN
MDBSrug1_00747.1	1.18317	0.299698	NaN	NaN
MDBSrug1_06914.1	1.17222	0.550911	NaN	NaN				phenylalanine ammonia-lyase activity [GO:0045548]	cytoplasm [GO:0005737]	L-phenylalanine catabolic process [GO:0006559]; cinnamic acid biosynthetic process [GO:0009800]
MDBSrug1_12373.1	1.15595	1.06562	NaN	NaN					spliceosomal complex [GO:0005681]; U5 snRNP [GO:0005682]
MDBSrug1_12120.1	1.14372	0.513546	NaN	NaN				structural constituent of nuclear pore [GO:0017056]	nuclear pore [GO:0005643]	macromolecule localization [GO:0033036]; ribonucleoprotein complex export from nucleus [GO:0071426]; organic substance transport [GO:0071702]
MDBSrug1_10600.2	1.13901	0.937962	NaN	NaN				beta-glucosidase activity [GO:0008422]; scopolin beta-glucosidase activity [GO:0102483]		cellulose catabolic process [GO:0030245]
MDBSrug1_10883.1	1.13582	2.0243	NaN	NaN				RNA binding [GO:0003723]	nucleolus [GO:0005730]; viral nucleocapsid [GO:0019013]; intracellular ribonucleoprotein complex [GO:0030529]	ribosome biogenesis [GO:0042254]
MDBSrug1_07384.1	1.12125	1.08884	NaN	NaN				oxidoreductase activity [GO:0016491]		oxidation-reduction process [GO:0055114]
MDBSrug1_05632.1	1.12008	1.05242	NaN	NaN				hydrogen ion transmembrane transporter activity [GO:0015078]	vacuolar proton-transporting V-type ATPase, V0 domain [GO:0000220]; integral component of membrane [GO:0016021]	ATP hydrolysis coupled proton transport [GO:0015991]
MDBSrug1_09921.1	1.108	1.24843	NaN	NaN				acyl-CoA dehydrogenase activity [GO:0003995]; heme binding [GO:0020037]; metal ion binding [GO:0046872]; flavin adenine dinucleotide binding [GO:0050660]	integral component of membrane [GO:0016021]	oxidation-reduction process [GO:0055114]
MDBSrug1_02555.1	1.10668	1.41998	NaN	NaN				electron carrier activity [GO:0009055]	nucleus [GO:0005634]; mitochondrion [GO:0005739]; cytosol [GO:0005829]
MDBSrug1_08131.1	1.06327	1.1856	NaN	NaN				transferase activity, transferring phosphorus-containing groups [GO:0016772]		cellular metabolic process [GO:0044237]; single-organism metabolic process [GO:0044710]
MDBSrug1_10011.1	1.05944	0.276534	NaN	NaN				transporter activity [GO:0005215]	integral component of membrane [GO:0016021]	oligopeptide transport [GO:0006857]
MDBSrug1_12446.1	1.03257	0.5672	NaN	NaN
MDBSrug1_10980.1	1.01127	0.231622	NaN	NaN
MDBSrug1_06174.1	1.0095	0.872055	NaN	NaN				hydrolase activity [GO:0016787]	nucleus [GO:0005634]; cytosol [GO:0005829]
MDBSrug1_07312.1	1.00574	0.982413	NaN	NaN				translation release factor activity, codon specific [GO:0016149]	nucleus [GO:0005634]; cytosol [GO:0005829]; cytoplasmic stress granule [GO:0010494]; translation release factor complex [GO:0018444]	cytoplasmic translational termination [GO:0002184]; DNA-templated transcription, termination [GO:0006353]
MDBSrug1_06106.1	0.986425	0.784405	NaN	NaN				GTPase activity [GO:0003924]; GTP binding [GO:0005525]	late endosome [GO:0005770]; cytosol [GO:0005829]	protein targeting to vacuole [GO:0006623]; Golgi to endosome transport [GO:0006895]; endocytosis [GO:0006897]; small GTPase mediated signal transduction [GO:0007264]; late endosome to vacuole transport via multivesicular body sorting pathway [GO:0032511]; protein localization to endosome [GO:0036010]; multivesicular body assembly [GO:0036258]
MDBSrug1_03570.2	0.97838	0.911781	NaN	NaN				peroxiredoxin activity [GO:0051920]		oxidation-reduction process [GO:0055114]; cellular oxidant detoxification [GO:0098869]
MDBSrug1_12655.1	0.962253	1.15913	NaN	NaN				single-stranded DNA binding [GO:0003697]	DNA replication factor A complex [GO:0005662]; cytosol [GO:0005829]; site of double-strand break [GO:0035861]	DNA replication [GO:0006260]; DNA repair [GO:0006281]; DNA recombination [GO:0006310]
MDBSrug1_01228.1	0.958248	0.804382	NaN	NaN				hydrolase activity, acting on glycosyl bonds [GO:0016798]
MDBSrug1_03192.1	0.958141	1.3868	NaN	NaN				calcium ion binding [GO:0005509]; calcium-dependent protein serine/threonine phosphatase regulator activity [GO:0008597]	nucleus [GO:0005634]; cytosol [GO:0005829]; calcineurin complex [GO:0005955]; cell division site [GO:0032153]	adaptation of signaling pathway by response to pheromone involved in conjugation with cellular fusion [GO:0000754]; cellular ion homeostasis [GO:0006873]; dephosphorylation [GO:0016311]; fungal-type cell wall organization [GO:0031505]; regulation of catalytic activity [GO:0050790]
MDBSrug1_11249.1	0.956369	1.70933	NaN	NaN				glycerol-3-phosphate dehydrogenase [NAD+] activity [GO:0004367]; NAD binding [GO:0051287]	glycerol-3-phosphate dehydrogenase complex [GO:0009331]	carbohydrate metabolic process [GO:0005975]; glycerol-3-phosphate catabolic process [GO:0046168]; oxidation-reduction process [GO:0055114]
MDBSrug1_01167.2;MDBSrug1_07281.1	0.935032	1.08873	NaN	NaN				ornithine carbamoyltransferase activity [GO:0004585]; amino acid binding [GO:0016597]	mitochondrial matrix [GO:0005759]	arginine biosynthetic process [GO:0006526]; ornithine metabolic process [GO:0006591]
MDBSrug1_05549.1	0.926207	1.47291	NaN	NaN				hydrolase activity [GO:0016787]	membrane [GO:0016020]
MDBSrug1_04240.1	0.924222	0.639556	NaN	NaN				peptidyl-prolyl cis-trans isomerase activity [GO:0003755]		protein peptidyl-prolyl isomerization [GO:0000413]; protein folding [GO:0006457]
MDBSrug1_01878.1	0.918303	1.11941	NaN	NaN				catalytic activity [GO:0003824]; binding [GO:0005488]
MDBSrug1_06963.1	0.914936	0.193016	NaN	NaN
MDBSrug1_03698.1	0.883285	0.80239	NaN	NaN				structural constituent of ribosome [GO:0003735]; rRNA binding [GO:0019843]; metal ion binding [GO:0046872]	ribosome [GO:0005840]	translation [GO:0006412]
MDBSrug1_01649.1	0.880308	0.475014	NaN	NaN					cytoplasm [GO:0005737]
MDBSrug1_01022.1	0.87407	1.05925	NaN	NaN				transferase activity, transferring glycosyl groups [GO:0016757]	endoplasmic reticulum membrane [GO:0005789]; integral component of membrane [GO:0016021]	protein N-linked glycosylation via asparagine [GO:0018279]
MDBSrug1_07825.1	0.865811	0.702504	NaN	NaN					mitochondrial inner membrane [GO:0005743]; respiratory chain [GO:0070469]	oxidation-reduction process [GO:0055114]
MDBSrug1_09720.1	0.859786	0.571201	NaN	NaN				oxidoreductase activity [GO:0016491]	membrane [GO:0016020]
MDBSrug1_01795.1	0.857801	2.73079	NaN	NaN				nucleotide binding [GO:0000166]; metal ion binding [GO:0046872]; nucleoside-triphosphate diphosphatase activity [GO:0047429]	nucleus [GO:0005634]; cytoplasm [GO:0005737]	nucleotide metabolic process [GO:0009117]; deoxyribonucleoside triphosphate catabolic process [GO:0009204]
MDBSrug1_11765.1	0.820904	1.16944	NaN	NaN				glycerol kinase activity [GO:0004370]		carbohydrate metabolic process [GO:0005975]; glycerol-3-phosphate metabolic process [GO:0006072]; phosphorylation [GO:0016310]
MDBSrug1_02777.1	0.814808	0.195481	NaN	NaN
MDBSrug1_02831.1	0.807117	0.809448	NaN	NaN
MDBSrug1_11882.1	0.803254	0.676608	NaN	NaN				hydrolase activity, acting on glycosyl bonds [GO:0016798]		metabolic process [GO:0008152]
MDBSrug1_06271.1	0.793649	2.014	NaN	NaN				glyceraldehyde-3-phosphate dehydrogenase (NAD+) (phosphorylating) activity [GO:0004365]; NADP binding [GO:0050661]; NAD binding [GO:0051287]	cytoplasm [GO:0005737]	glucose metabolic process [GO:0006006]; glycolytic process [GO:0006096]; oxidation-reduction process [GO:0055114]
MDBSrug1_10952.1	0.791132	0.590097	NaN	NaN				xylan 1,4-beta-xylosidase activity [GO:0009044]		carbohydrate metabolic process [GO:0005975]
MDBSrug1_02442.1	0.78174	0.491707	NaN	NaN				homoserine O-acetyltransferase activity [GO:0004414]; hydrolase activity [GO:0016787]	cytoplasm [GO:0005737]	methionine biosynthetic process [GO:0009086]
MDBSrug1_00861.1	0.780747	1.29829	NaN	NaN
MDBSrug1_10154.1	0.76976	0.786625	NaN	NaN
MDBSrug1_05568.1	0.768555	1.10267	NaN	NaN					nucleus [GO:0005634]; cytosol [GO:0005829]; polysome [GO:0005844]	cytoplasmic translation [GO:0002181]
MDBSrug1_10927.2	0.765507	0.447797	NaN	NaN				hydrolase activity [GO:0016787]
MDBSrug1_06088.1	0.764868	0.968014	NaN	NaN				oxidoreductase activity [GO:0016491]		oxidation-reduction process [GO:0055114]
MDBSrug1_12396.1	0.75863	0.167382	NaN	NaN
MDBSrug1_12751.1	0.757425	0.672055	NaN	NaN				transferase activity [GO:0016740]; ligase activity [GO:0016874]	integral component of membrane [GO:0016021]
MDBSrug1_11825.1	0.756681	0.64115	NaN	NaN				nucleotide binding [GO:0000166]; monooxygenase activity [GO:0004497]; coenzyme binding [GO:0050662]
MDBSrug1_06580.4;MDBSrug1_05152.1	0.756291	0.625384	NaN	NaN				oxidoreductase activity, acting on the aldehyde or oxo group of donors, NAD or NADP as acceptor [GO:0016620]		single-organism metabolic process [GO:0044710]
MDBSrug1_03038.1	0.755157	0.695959	NaN	NaN
MDBSrug1_08233.1	0.750018	0.870518	NaN	NaN				peptidase activity [GO:0008233]	signal peptidase complex [GO:0005787]; integral component of membrane [GO:0016021]	signal peptide processing [GO:0006465]; protein targeting to ER [GO:0045047]
MDBSrug1_04844.1	0.743815	0.670689	NaN	NaN				hydrolase activity, acting on carbon-nitrogen (but not peptide) bonds [GO:0016810]	membrane [GO:0016020]
MDBSrug1_11680.1	0.742929	0.44473	NaN	NaN
MDBSrug1_02929.1	0.742752	0.0981901	NaN	NaN				chitin synthase activity [GO:0004100]	integral component of membrane [GO:0016021]	chitin biosynthetic process [GO:0006031]
MDBSrug1_02714.1	0.720068	0.837507	NaN	NaN				pyrroline-5-carboxylate reductase activity [GO:0004735]; identical protein binding [GO:0042802]	cytosol [GO:0005829]; integral component of membrane [GO:0016021]	oxidation-reduction process [GO:0055114]; L-proline biosynthetic process [GO:0055129]
MDBSrug1_12051.1	0.720033	0.639215	NaN	NaN				structural constituent of ribosome [GO:0003735]; magnesium-dependent protein serine/threonine phosphatase activity [GO:0004724]; metal ion binding [GO:0046872]; cofactor binding [GO:0048037]	ribosome [GO:0005840]	translation [GO:0006412]; protein dephosphorylation [GO:0006470]
MDBSrug1_04483.1	0.716984	0.584348	NaN	NaN				acyl-CoA dehydrogenase activity [GO:0003995]; heme binding [GO:0020037]; metal ion binding [GO:0046872]; flavin adenine dinucleotide binding [GO:0050660]		oxidation-reduction process [GO:0055114]
MDBSrug1_06618.1	0.713936	0.998463	NaN	NaN
MDBSrug1_04462.1	0.709187	0.885487	NaN	NaN				adenine nucleotide transmembrane transporter activity [GO:0000295]	integral component of peroxisomal membrane [GO:0005779]	fatty acid beta-oxidation [GO:0006635]; peroxisome organization [GO:0007031]; ATP transport [GO:0015867]; transmembrane transport [GO:0055085]
MDBSrug1_10246.1	0.709116	1.09323	NaN	NaN					nucleus [GO:0005634]	chromatin assembly or disassembly [GO:0006333]
MDBSrug1_01310.1	0.707521	0.0840922	NaN	NaN					cellular bud scar [GO:0005621]; endoplasmic reticulum [GO:0005783]; cellular bud neck [GO:0005935]; integral component of membrane [GO:0016021]; plasma membrane of growing cell tip [GO:1902929]	cellular bud site selection [GO:0000282]; positive regulation of establishment of bipolar cell polarity regulating cell shape [GO:0061161]; actin filament bundle organization [GO:0061572]
MDBSrug1_00263.1	0.707379	1.16949	NaN	NaN
MDBSrug1_02503.1	0.704154	0.434957	NaN	NaN				metal ion binding [GO:0046872]
MDBSrug1_04730.1	0.701815	0.461013	NaN	NaN				serine-type peptidase activity [GO:0008236]
MDBSrug1_02973.1	0.700007	0.789471	NaN	NaN				nucleotide binding [GO:0000166]; nucleic acid binding [GO:0003676]
MDBSrug1_01144.1	0.699936	0.449277	NaN	NaN				carbon-nitrogen ligase activity, with glutamine as amido-N-donor [GO:0016884]
MDBSrug1_05800.1	0.69983	0.434166	NaN	NaN				signal transducer activity [GO:0004871]	heterotrimeric G-protein complex [GO:0005834]	G-protein coupled receptor signaling pathway [GO:0007186]
MDBSrug1_11711.1	0.699511	0.293939	NaN	NaN				serine-type peptidase activity [GO:0008236]		proteolysis [GO:0006508]
MDBSrug1_05286.1	0.698554	0.981047	NaN	NaN
MDBSrug1_09644.1	0.680371	0.299937	NaN	NaN				phosphotransferase activity, alcohol group as acceptor [GO:0016773]		carbohydrate metabolic process [GO:0005975]
MDBSrug1_03360.1	0.680265	1.30438	NaN	NaN				sugar:proton symporter activity [GO:0005351]	Golgi membrane [GO:0000139]; integral component of membrane [GO:0016021]	carbohydrate transport [GO:0008643]; proton transport [GO:0015992]; transmembrane transport [GO:0055085]
MDBSrug1_12070.2	0.675232	0.724473	NaN	NaN				homoserine O-acetyltransferase activity [GO:0004414]	cytoplasm [GO:0005737]	methionine biosynthetic process [GO:0009086]
MDBSrug1_09342.1	0.675055	0.893625	NaN	NaN				acetoacetate-CoA ligase activity [GO:0030729]		lipid metabolic process [GO:0006629]
MDBSrug1_02455.1	0.671936	0.481639	NaN	NaN				magnesium ion binding [GO:0000287]; homoisocitrate dehydrogenase activity [GO:0047046]; NAD binding [GO:0051287]	mitochondrion [GO:0005739]	lysine biosynthetic process [GO:0009085]; oxidation-reduction process [GO:0055114]
MDBSrug1_09166.2	0.668711	0.459852	NaN	NaN				nucleotide binding [GO:0000166]; poly(U) RNA binding [GO:0008266]	cytoplasmic mRNA processing body [GO:0000932]; nucleus [GO:0005634]; cytosol [GO:0005829]	mRNA splicing, via spliceosome [GO:0000398]; chromatin remodeling [GO:0006338]; negative regulation of induction of conjugation with cellular fusion by negative regulation of transcription from RNA polymerase II promoter [GO:1902625]
MDBSrug1_11760.1	0.659743	0.861582	NaN	NaN				1-pyrroline-5-carboxylate dehydrogenase activity [GO:0003842]; aldehyde dehydrogenase (NAD) activity [GO:0004029]		oxidation-reduction process [GO:0055114]
MDBSrug1_12016.3	0.653151	0.321036	NaN	NaN
MDBSrug1_08758.1	0.647338	0.385595	NaN	NaN				ATP binding [GO:0005524]; ATPase activity [GO:0016887]; unfolded protein binding [GO:0051082]	Golgi apparatus [GO:0005794]; integral component of membrane [GO:0016021]; nuclear membrane [GO:0031965]; luminal surveillance complex [GO:0034099]	karyogamy involved in conjugation with cellular fusion [GO:0000742]; SRP-dependent cotranslational protein targeting to membrane, translocation [GO:0006616]; response to unfolded protein [GO:0006986]; ER-associated ubiquitin-dependent protein catabolic process [GO:0030433]; posttranslational protein targeting to membrane, translocation [GO:0031204]; 'de novo' posttranslational protein folding [GO…
MDBSrug1_03551.1	0.638265	0.624417	NaN	NaN				GDP-mannose 4,6-dehydratase activity [GO:0008446]		GDP-mannose metabolic process [GO:0019673]
MDBSrug1_07536.1	0.634437	0.571941	NaN	NaN				chitinase activity [GO:0004568]	integral component of membrane [GO:0016021]	carbohydrate metabolic process [GO:0005975]; chitin catabolic process [GO:0006032]
MDBSrug1_05892.1	0.633444	1.10831	NaN	NaN				lyase activity [GO:0016829]		metabolic process [GO:0008152]
MDBSrug1_04592.1	0.626037	0.756517	NaN	NaN				ATP binding [GO:0005524]
MDBSrug1_05267.1	0.625434	0.582299	NaN	NaN						vesicle docking involved in exocytosis [GO:0006904]
MDBSrug1_04120.1	0.625399	0.580193	NaN	NaN				phosphoric diester hydrolase activity [GO:0008081]	integral component of membrane [GO:0016021]	lipid metabolic process [GO:0006629]
MDBSrug1_02283.1	0.612852	0.684519	NaN	NaN				L-threonine ammonia-lyase activity [GO:0004794]; pyridoxal phosphate binding [GO:0030170]	cytoplasm [GO:0005737]	threonine catabolic process [GO:0006567]; isoleucine biosynthetic process [GO:0009097]
MDBSrug1_08382.1;MDBSrug1_03745.1	0.612214	0.485595	NaN	NaN				amino acid transmembrane transporter activity [GO:0015171]	integral component of membrane [GO:0016021]	amino acid transmembrane transport [GO:0003333]
MDBSrug1_02582.1	0.611292	0.719977	NaN	NaN				endodeoxyribonuclease activity, producing 5'-phosphomonoesters [GO:0016888]		DNA metabolic process [GO:0006259]
MDBSrug1_08994.1	0.610264	0.21955	NaN	NaN				Atg12 activating enzyme activity [GO:0019778]; Atg8 activating enzyme activity [GO:0019779]	nucleus [GO:0005634]; mitochondrion [GO:0005739]; cytosol [GO:0005829]; extrinsic component of pre-autophagosomal structure membrane [GO:0097632]	mitophagy [GO:0000422]; C-terminal protein lipidation [GO:0006501]; macroautophagy [GO:0016236]; CVT pathway [GO:0032258]; protein modification by small protein conjugation [GO:0032446]; piecemeal microautophagy of nucleus [GO:0034727]; late nucleophagy [GO:0044805]
MDBSrug1_00236.1	0.60991	0.437587	NaN	NaN
MDBSrug1_04139.1	0.609024	0.739841	NaN	NaN
MDBSrug1_09519.1	0.608528	0.839215	NaN	NaN				ketol-acid reductoisomerase activity [GO:0004455]; isomerase activity [GO:0016853]; NADP binding [GO:0050661]		branched-chain amino acid biosynthetic process [GO:0009082]; oxidation-reduction process [GO:0055114]
MDBSrug1_04689.1	0.608315	0.734604	NaN	NaN				peptidase activity [GO:0008233]	signal peptidase complex [GO:0005787]; integral component of membrane [GO:0016021]	signal peptide processing [GO:0006465]; protein targeting to ER [GO:0045047]
MDBSrug1_11526.1	0.607216	0.296699	NaN	NaN
MDBSrug1_05129.1;MDBSrug1_06823.1;MDBSrug1_04419.1;MDBSrug1_02883.1	0.603176	0.516636	NaN	NaN				deoxyribose-phosphate aldolase activity [GO:0004139]	cytoplasm [GO:0005737]	deoxyribonucleotide catabolic process [GO:0009264]
MDBSrug1_11196.1	0.602644	0.453705	NaN	NaN					integral component of membrane [GO:0016021]	transmembrane transport [GO:0055085]
MDBSrug1_06181.1	0.586305	0.51436	NaN	NaN					membrane [GO:0016020]
MDBSrug1_11258.1	0.583186	0.858054	NaN	NaN					mitochondrion [GO:0005739]; integral component of peroxisomal membrane [GO:0005779]; endoplasmic reticulum [GO:0005783]; peroxisomal importomer complex [GO:1990429]	peroxisome fission [GO:0016559]; fatty acid oxidation [GO:0019395]; regulation of peroxisome size [GO:0044375]
MDBSrug1_10642.1	0.581449	0.445788	NaN	NaN				Ran GTPase binding [GO:0008536]	nucleus [GO:0005634]; cytosol [GO:0005829]	protein import into nucleus [GO:0006606]; poly(A)+ mRNA export from nucleus [GO:0016973]
MDBSrug1_06418.1	0.580386	0.0523973	NaN	NaN
MDBSrug1_05350.1	0.578472	0.396682	NaN	NaN				oxidoreductase activity, acting on the aldehyde or oxo group of donors, disulfide as acceptor [GO:0016624]		oxidation-reduction process [GO:0055114]
MDBSrug1_12608.1	0.567023	0.334212	NaN	NaN				glycine dehydrogenase (decarboxylating) activity [GO:0004375]		glycine catabolic process [GO:0006546]; oxidation-reduction process [GO:0055114]
MDBSrug1_09853.1	0.565074	0.864371	NaN	NaN
MDBSrug1_12156.1	0.560821	1.72669	NaN	NaN				structural constituent of ribosome [GO:0003735]	ribosome [GO:0005840]	translation [GO:0006412]
MDBSrug1_08884.1	0.557206	0.195487	NaN	NaN					nucleus [GO:0005634]; cytosol [GO:0005829]
MDBSrug1_03553.1	0.555327	0.277655	NaN	NaN				oxidoreductase activity, acting on the CH-OH group of donors, NAD or NADP as acceptor [GO:0016616]; NAD binding [GO:0051287]		oxidation-reduction process [GO:0055114]
MDBSrug1_05344.1	0.550223	0.431696	NaN	NaN
MDBSrug1_00935.1	0.549089	0.421121	NaN	NaN				protein serine/threonine kinase activity [GO:0004674]; ATP binding [GO:0005524]		protein phosphorylation [GO:0006468]
MDBSrug1_10307.1	0.535833	0.645077	NaN	NaN				transferase activity, transferring acyl groups [GO:0016746]	intracellular membrane-bounded organelle [GO:0043231]; cytoplasmic part [GO:0044444]	cellular metabolic process [GO:0044237]; organic substance metabolic process [GO:0071704]
MDBSrug1_10408.1	0.534876	0.379664	NaN	NaN				translation initiation factor activity [GO:0003743]		translational initiation [GO:0006413]
MDBSrug1_10499.1	0.53477	0.250837	NaN	NaN				oxidoreductase activity, acting on paired donors, with incorporation or reduction of molecular oxygen, reduced ascorbate as one donor, and incorporation of one atom of oxygen [GO:0016715]		oxidation-reduction process [GO:0055114]
MDBSrug1_01848.1	0.530588	0.483791	NaN	NaN
MDBSrug1_03295.1	0.522648	0.12868	NaN	NaN				prephenate dehydrogenase (NADP+) activity [GO:0004665]; prephenate dehydrogenase activity [GO:0008977]; identical protein binding [GO:0042802]	cytosol [GO:0005829]	tyrosine biosynthetic process [GO:0006571]; oxidation-reduction process [GO:0055114]
MDBSrug1_01850.1	0.520805	0.238349	NaN	NaN				secondary active sulfate transmembrane transporter activity [GO:0008271]	fungal-type vacuole membrane [GO:0000329]; endoplasmic reticulum [GO:0005783]; integral component of membrane [GO:0016021]	sulfate transmembrane transport [GO:1902358]
MDBSrug1_01674.1	0.494542	0.373352	NaN	NaN				GTPase activity [GO:0003924]; signal transducer activity [GO:0004871]; GTP binding [GO:0005525]; G-protein beta/gamma-subunit complex binding [GO:0031683]		G-protein coupled receptor signaling pathway [GO:0007186]
MDBSrug1_06158.1;MDBSrug1_01439.1	0.493124	0.480933	NaN	NaN				catalytic activity [GO:0003824]; binding [GO:0005488]
MDBSrug1_01123.1	0.491742	2.45862	NaN	NaN				catalytic activity [GO:0003824]		nucleobase-containing compound metabolic process [GO:0006139]
MDBSrug1_01902.1	0.483448	0.290581	NaN	NaN
MDBSrug1_12033.1	0.48118	0.770802	NaN	NaN				ATP binding [GO:0005524]; mismatched DNA binding [GO:0030983]	mismatch repair complex [GO:0032300]	mismatch repair [GO:0006298]
MDBSrug1_01645.1	0.473382	0.757712	NaN	NaN				phosphatase activity [GO:0016791]		dephosphorylation [GO:0016311]
MDBSrug1_10810.1	0.469483	0.293597	NaN	NaN					integral component of membrane [GO:0016021]
MDBSrug1_10841.1	0.463706	0.491816	NaN	NaN					integral component of membrane [GO:0016021]
MDBSrug1_00442.1	0.462855	0.742174	NaN	NaN				substrate-specific transmembrane transporter activity [GO:0022891]	integral component of membrane [GO:0016021]	carbohydrate transport [GO:0008643]; transmembrane transport [GO:0055085]
MDBSrug1_08657.1	0.459276	0.400017	NaN	NaN				oxidoreductase activity [GO:0016491]; coenzyme binding [GO:0050662]		nucleotide-sugar biosynthetic process [GO:0009226]; oxidation-reduction process [GO:0055114]
MDBSrug1_12282.1	0.457716	0.221981	NaN	NaN					integral component of membrane [GO:0016021]
MDBSrug1_11211.1	0.448111	0.380962	NaN	NaN
MDBSrug1_08085.1	0.446835	0.225293	NaN	NaN
MDBSrug1_00047.1	0.445169	0.703699	NaN	NaN				ornithine-oxo-acid transaminase activity [GO:0004587]; pyridoxal phosphate binding [GO:0030170]
MDBSrug1_03161.1	0.44003	0.116283	NaN	NaN				acyl-CoA dehydrogenase activity [GO:0003995]; heme binding [GO:0020037]; metal ion binding [GO:0046872]; flavin adenine dinucleotide binding [GO:0050660]		oxidation-reduction process [GO:0055114]
MDBSrug1_09846.1	0.436485	0.443739	NaN	NaN
MDBSrug1_02011.1	0.433544	0.547274	NaN	NaN				nucleotide binding [GO:0000166]; RNA cap binding [GO:0000339]	nuclear cap binding complex [GO:0005846]	mRNA cis splicing, via spliceosome [GO:0045292]
MDBSrug1_07739.1	0.429751	0.392624	NaN	NaN					nucleus [GO:0005634]
MDBSrug1_01240.1	0.424966	0.151451	NaN	NaN
MDBSrug1_02785.1	0.423797	0.315424	NaN	NaN				alpha,alpha-trehalase activity [GO:0004555]; calcium ion binding [GO:0005509]	cytosol [GO:0005829]	trehalose catabolic process involved in cellular response to stress [GO:1903134]
MDBSrug1_04322.1	0.423301	0.172339	NaN	NaN					nuclear chromosome [GO:0000228]; cytosol [GO:0005829]; Ski complex [GO:0055087]	protein complex assembly [GO:0006461]; reciprocal meiotic recombination [GO:0007131]; protein-DNA complex assembly [GO:0065004]; nuclear-transcribed mRNA catabolic process, 3'-5' exonucleolytic nonsense-mediated decay [GO:0070478]; nuclear-transcribed mRNA catabolic process, non-stop decay [GO:0070481]
MDBSrug1_08805.1	0.421103	0.0901366	NaN	NaN				hydrolase activity [GO:0016787]	cytosol [GO:0005829]	metabolic process [GO:0008152]
MDBSrug1_04554.1	0.410647	0.195731	NaN	NaN				oxidoreductase activity, acting on CH-OH group of donors [GO:0016614]; flavin adenine dinucleotide binding [GO:0050660]		oxidation-reduction process [GO:0055114]
MDBSrug1_12039.1	0.410364	0.684804	NaN	NaN
MDBSrug1_08587.1	0.406146	0.370484	NaN	NaN
MDBSrug1_07600.1	0.40168	0.751224	NaN	NaN				purine-nucleoside phosphorylase activity [GO:0004731]; inosine nucleosidase activity [GO:0047724]; nicotinamide riboside hydrolase activity [GO:0070635]	nucleus [GO:0005634]; cytosol [GO:0005829]	inosine catabolic process [GO:0006148]; nicotinate nucleotide salvage [GO:0019358]; NAD biosynthesis via nicotinamide riboside salvage pathway [GO:0034356]; guanosine catabolic process [GO:0046115]
MDBSrug1_10470.1	0.39888	0.235606	NaN	NaN					cytosol [GO:0005829]	positive regulation of protein phosphatase type 2A activity [GO:0034049]; signal transduction involved in cellular response to ammonium ion [GO:1903831]
MDBSrug1_10562.1	0.397569	0.0851508	NaN	NaN					integral component of membrane [GO:0016021]
MDBSrug1_12074.1	0.395867	0.585202	NaN	NaN				peptidyl-prolyl cis-trans isomerase activity [GO:0003755]		protein peptidyl-prolyl isomerization [GO:0000413]; protein folding [GO:0006457]
MDBSrug1_01413.1	0.382682	0.329943	NaN	NaN				GTPase activity [GO:0003924]; GTP binding [GO:0005525]; GDP binding [GO:0019003]	nucleus [GO:0005634]; cytosol [GO:0005829]; extrinsic component of plasma membrane [GO:0019897]	small GTPase mediated signal transduction [GO:0007264]; regulation of L-arginine import [GO:0010963]; lysine transport [GO:0015819]; retrograde transport, endosome to Golgi [GO:0042147]
MDBSrug1_07548.1	0.378961	0.0756289	NaN	NaN
MDBSrug1_12146.1	0.377649	0.35243	NaN	NaN				NADHX epimerase activity [GO:0052856]	nucleus [GO:0005634]; mitochondrion [GO:0005739]; cytosol [GO:0005829]	nicotinamide nucleotide metabolic process [GO:0046496]
MDBSrug1_03674.1	0.372723	0.476557	NaN	NaN				nucleotide binding [GO:0000166]; protein kinase activity [GO:0004672]	cytoplasm [GO:0005737]; intracellular organelle [GO:0043229]	protein phosphorylation [GO:0006468]; positive regulation of biological process [GO:0048518]; regulation of protein localization to nucleus [GO:1900180]
MDBSrug1_03796.1	0.372616	0.491429	NaN	NaN
MDBSrug1_11427.1	0.368151	0.145612	NaN	NaN				anthranilate synthase activity [GO:0004049]; serine-type carboxypeptidase activity [GO:0004185]; indole-3-glycerol-phosphate synthase activity [GO:0004425]; phosphoribosylanthranilate isomerase activity [GO:0004640]; transferase activity [GO:0016740]		tryptophan biosynthetic process [GO:0000162]; proteolysis [GO:0006508]; glutamine metabolic process [GO:0006541]
MDBSrug1_08029.1	0.365705	0.430598	NaN	NaN
MDBSrug1_01739.1	0.365457	0.0535999	NaN	NaN				cis-stilbene-oxide hydrolase activity [GO:0033961]
MDBSrug1_08292.1	0.362728	0.45107	NaN	NaN				manganese ion transmembrane transporter activity [GO:0005384]; ferrous iron transmembrane transporter activity [GO:0015093]	fungal-type vacuole membrane [GO:0000329]; Golgi apparatus [GO:0005794]; integral component of membrane [GO:0016021]	cellular calcium ion homeostasis [GO:0006874]; cellular iron ion homeostasis [GO:0006879]; cellular manganese ion homeostasis [GO:0030026]; manganese ion transmembrane transport [GO:0071421]; ferrous iron transmembrane transport [GO:1903874]
MDBSrug1_06300.1	0.36092	0.0541235	NaN	NaN					integral component of membrane [GO:0016021]
MDBSrug1_08553.1	0.359254	0.0688105	NaN	NaN				alpha,alpha-trehalase activity [GO:0004555]		trehalose metabolic process [GO:0005991]
MDBSrug1_05227.1	0.349334	0.893625	NaN	NaN
MDBSrug1_05969.1	0.348855	0.452362	NaN	NaN				binding [GO:0005488]; hydrolase activity [GO:0016787]		nucleotide catabolic process [GO:0009166]
MDBSrug1_08038.1	0.342631	0.0126016	NaN	NaN
MDBSrug1_09626.1	0.342054	0.0241286	NaN	NaN				sugar:proton symporter activity [GO:0005351]; glucose transmembrane transporter activity [GO:0005355]	integral component of plasma membrane [GO:0005887]	hexose transmembrane transport [GO:0035428]; glucose import [GO:0046323]
MDBSrug1_06563.1	0.339388	0.532265	NaN	NaN				transferase activity, transferring phosphorus-containing groups [GO:0016772]		metabolic process [GO:0008152]
MDBSrug1_00640.1	0.336666	0.662379	NaN	NaN					endoplasmic reticulum membrane [GO:0005789]; integral component of membrane [GO:0016021]; ER to Golgi transport vesicle [GO:0030134]	ER to Golgi vesicle-mediated transport [GO:0006888]
MDBSrug1_04373.1	0.331176	0.515151	NaN	NaN				zinc ion binding [GO:0008270]; guanine deaminase activity [GO:0008892]		guanine catabolic process [GO:0006147]
MDBSrug1_01259.1	0.330159	0.479505	NaN	NaN					membrane [GO:0016020]
MDBSrug1_07964.1	0.327901	0.677348	NaN	NaN				hydrolase activity [GO:0016787]		metabolic process [GO:0008152]
MDBSrug1_01390.1	0.326242	0.340302	NaN	NaN				hydrolase activity, hydrolyzing O-glycosyl compounds [GO:0004553]		organic substance metabolic process [GO:0071704]
MDBSrug1_05408.1	0.322967	0.16284	NaN	NaN
MDBSrug1_07468.1	0.319168	0.279516	NaN	NaN				diphthine synthase activity [GO:0004164]	nucleus [GO:0005634]; cytosol [GO:0005829]	peptidyl-diphthamide biosynthetic process from peptidyl-histidine [GO:0017183]; methylation [GO:0032259]
MDBSrug1_04890.1	0.316903	0.302561	NaN	NaN				transmembrane transporter activity [GO:0022857]	integral component of membrane [GO:0016021]	transmembrane transport [GO:0055085]
MDBSrug1_12314.1	0.316499	0.367905	NaN	NaN				alpha-1,4-glucosidase activity [GO:0004558]	endoplasmic reticulum lumen [GO:0005788]; glucosidase II complex [GO:0017177]	polysaccharide biosynthetic process [GO:0000271]; N-glycan processing [GO:0006491]
MDBSrug1_01711.1	0.316215	0.249915	NaN	NaN				nucleotide binding [GO:0000166]; nucleic acid binding [GO:0003676]; DNA-directed RNA polymerase activity [GO:0003899]; translation initiation factor binding [GO:0031369]	cytoplasmic mRNA processing body [GO:0000932]; DNA-directed RNA polymerase II, core complex [GO:0005665]	nuclear-transcribed mRNA catabolic process, deadenylation-dependent decay [GO:0000288]; transcription, RNA-templated [GO:0001172]; transcription initiation from RNA polymerase II promoter [GO:0006367]; mRNA export from nucleus in response to heat stress [GO:0031990]; recruitment of 3'-end processing factors to RNA polymerase II holoenzyme complex [GO:0034402]; positive regulation of translational…
MDBSrug1_11047.1;MDBSrug1_06774.1	0.313982	0.733694	NaN	NaN
MDBSrug1_11407.1	0.313298	0.528913	NaN	NaN				cis-stilbene-oxide hydrolase activity [GO:0033961]
MDBSrug1_10938.1	0.309035	0.185139	NaN	NaN				transferase activity [GO:0016740]	integral component of membrane [GO:0016021]
MDBSrug1_06484.1	0.308971	0.10185	NaN	NaN				oxidoreductase activity [GO:0016491]		metabolic process [GO:0008152]
MDBSrug1_04091.1	0.307113	0.376488	NaN	NaN				beta-glucosidase activity [GO:0008422]; scopolin beta-glucosidase activity [GO:0102483]		cellulose catabolic process [GO:0030245]
MDBSrug1_03262.1	0.306965	0.148902	NaN	NaN				translation initiation factor activity [GO:0003743]; guanyl-nucleotide exchange factor activity [GO:0005085]; nucleotidyltransferase activity [GO:0016779]	eukaryotic translation initiation factor 2B complex [GO:0005851]; guanyl-nucleotide exchange factor complex [GO:0032045]	regulation of translational initiation [GO:0006446]; positive regulation of GTPase activity [GO:0043547]
MDBSrug1_10721.1	0.306011	0.0764826	NaN	NaN				beta-galactosidase activity [GO:0004565]; 7S RNA binding [GO:0008312]	integral component of membrane [GO:0016021]; signal recognition particle [GO:0048500]	carbohydrate metabolic process [GO:0005975]; SRP-dependent cotranslational protein targeting to membrane [GO:0006614]
MDBSrug1_09324.1	0.305823	0.482584	NaN	NaN
MDBSrug1_01724.1	0.305153	0.414667	NaN	NaN
MDBSrug1_12385.2	0.304235	0.233574	NaN	NaN				hydrolase activity [GO:0016787]		carbohydrate metabolic process [GO:0005975]
MDBSrug1_01803.1	0.303225	0.38547	NaN	NaN				3-carboxy-cis,cis-muconate cycloisomerase activity [GO:0047472]		3,4-dihydroxybenzoate catabolic process [GO:0019619]
MDBSrug1_02127.1;MDBSrug1_01340.1	0.298972	0.110888	NaN	NaN
MDBSrug1_07944.1	0.295658	0.328833	NaN	NaN				oxidoreductase activity [GO:0016491]; metal ion binding [GO:0046872]		oxidation-reduction process [GO:0055114]
MDBSrug1_06117.1	0.293847	0.066716	NaN	NaN				RNA cap binding [GO:0000339]; mRNA binding [GO:0003729]	commitment complex [GO:0000243]; cytosol [GO:0005829]; polysome [GO:0005844]; nuclear cap binding complex [GO:0005846]; mitotic spindle [GO:0072686]	nuclear-transcribed mRNA catabolic process, nonsense-mediated decay [GO:0000184]; response to osmotic stress [GO:0006970]; mRNA cis splicing, via spliceosome [GO:0045292]; mRNA transport [GO:0051028]
MDBSrug1_06837.1	0.290632	0.852647	NaN	NaN				peptidyl-prolyl cis-trans isomerase activity [GO:0003755]		protein peptidyl-prolyl isomerization [GO:0000413]; protein folding [GO:0006457]
MDBSrug1_08990.1	0.289909	0.231155	NaN	NaN				nucleotide binding [GO:0000166]; hydrolase activity [GO:0016787]
MDBSrug1_01319.1	0.28897	0.544223	NaN	NaN					endoplasmic reticulum [GO:0005783]; integral component of membrane [GO:0016021]; ER to Golgi transport vesicle [GO:0030134]	protein retention in ER lumen [GO:0006621]; ER to Golgi vesicle-mediated transport [GO:0006888]; vesicle organization [GO:0016050]
MDBSrug1_10852.1	0.286585	0.38029	NaN	NaN				RNA polymerase I activity [GO:0001054]; DNA binding [GO:0003677]	DNA-directed RNA polymerase II, core complex [GO:0005665]; DNA-directed RNA polymerase III complex [GO:0005666]; DNA-directed RNA polymerase I complex [GO:0005736]; cytosol [GO:0005829]	transcription, RNA-templated [GO:0001172]; transcription from RNA polymerase I promoter [GO:0006360]; transcription from RNA polymerase II promoter [GO:0006366]; tRNA transcription from RNA polymerase III promoter [GO:0042797]
MDBSrug1_06759.1	0.286237	0.298048	NaN	NaN				guanyl-nucleotide exchange factor activity [GO:0005085]	nucleolus [GO:0005730]; cytosol [GO:0005829]	mature ribosome assembly [GO:0042256]; positive regulation of GTPase activity [GO:0043547]
MDBSrug1_00737.1;MDBSrug1_09118.1	0.286042	0.136249	NaN	NaN					intracellular [GO:0005622]
MDBSrug1_08324.1	0.283568	0.0554752	NaN	NaN
MDBSrug1_12326.1	0.283519	0.185327	NaN	NaN				ATPase activity, coupled to transmembrane movement of substances [GO:0042626]	fungal-type vacuole membrane [GO:0000329]; cytosol [GO:0005829]; cell division site [GO:0032153]	transmembrane transport [GO:0055085]
MDBSrug1_10343.1	0.28069	0.355327	NaN	NaN				translation initiation factor activity [GO:0003743]; GDP-dissociation inhibitor activity [GO:0005092]; GTPase activator activity [GO:0005096]; translation initiation factor binding [GO:0031369]	cytosolic small ribosomal subunit [GO:0022627]; eukaryotic 48S preinitiation complex [GO:0033290]; multi-eIF complex [GO:0043614]	formation of cytoplasmic translation initiation complex [GO:0001732]; mature ribosome assembly [GO:0042256]; positive regulation of GTPase activity [GO:0043547]; negative regulation of translational initiation [GO:0045947]
MDBSrug1_11404.1	0.276469	0.322726	NaN	NaN
MDBSrug1_05140.1	0.272521	0.161639	NaN	NaN					ER to Golgi transport vesicle [GO:0030134]; integral component of Golgi membrane [GO:0030173]; integral component of endoplasmic reticulum membrane [GO:0030176]	ER to Golgi vesicle-mediated transport [GO:0006888]; vesicle docking involved in exocytosis [GO:0006904]
MDBSrug1_06818.1	0.272312	0.89095	NaN	NaN
MDBSrug1_02959.1	0.27155	0.0453779	NaN	NaN				hydrolase activity [GO:0016787]
MDBSrug1_02168.1	0.266378	0.244792	NaN	NaN				mannosyl-oligosaccharide glucosidase activity [GO:0004573]	endoplasmic reticulum membrane [GO:0005789]	protein N-linked glycosylation [GO:0006487]; fungal-type cell wall biogenesis [GO:0009272]; oligosaccharide metabolic process [GO:0009311]
MDBSrug1_01031.1	0.258007	0.212954	NaN	NaN
MDBSrug1_11410.1	0.256631	0.570916	NaN	NaN				oxidoreductase activity [GO:0016491]		oxidation-reduction process [GO:0055114]
MDBSrug1_08190.1	0.255639	0.070222	NaN	NaN				hydrolase activity [GO:0016787]	endoplasmic reticulum [GO:0005783]; membrane [GO:0016020]
MDBSrug1_05590.1	0.254994	0.0744223	NaN	NaN					nucleus [GO:0005634]	mRNA processing [GO:0006397]
MDBSrug1_11909.1	0.252063	0.182703	NaN	NaN				FMN binding [GO:0010181]; oxidoreductase activity [GO:0016491]		oxidation-reduction process [GO:0055114]
MDBSrug1_05239.1	0.250911	0.116966	NaN	NaN
MDBSrug1_03052.1	0.247016	0.228384	NaN	NaN
MDBSrug1_09455.1	0.246091	0.283574	NaN	NaN					integral component of membrane [GO:0016021]	transmembrane transport [GO:0055085]
MDBSrug1_00262.2	0.2453	0.409533	NaN	NaN				carbon-nitrogen ligase activity, with glutamine as amido-N-donor [GO:0016884]	membrane [GO:0016020]
MDBSrug1_06054.1	0.243315	0.175225	NaN	NaN				oxidoreductase activity [GO:0016491]
MDBSrug1_09614.1	0.240172	0.121468	NaN	NaN				ATP binding [GO:0005524]; ATPase activity [GO:0016887]	nucleus [GO:0005634]; integral component of membrane [GO:0016021]	ribosomal large subunit assembly [GO:0000027]; metabolic process [GO:0008152]
MDBSrug1_01358.1	0.238938	0.30889	NaN	NaN				GTPase activity [GO:0003924]; GTP binding [GO:0005525]	endoplasmic reticulum membrane [GO:0005789]; integral component of membrane [GO:0016021]	endoplasmic reticulum organization [GO:0007029]
MDBSrug1_10672.1	0.237127	0.317712	NaN	NaN				GTP binding [GO:0005525]	intracellular [GO:0005622]	small GTPase mediated signal transduction [GO:0007264]
MDBSrug1_11991.1	0.233324	0.326124	NaN	NaN				S-adenosylmethionine-dependent methyltransferase activity [GO:0008757]	nuclear chromatin [GO:0000790]	histone lysine methylation [GO:0034968]
MDBSrug1_10432.1	0.231034	0.279032	NaN	NaN				sphingomyelin phosphodiesterase activity [GO:0004767]; hydrolase activity, acting on glycosyl bonds [GO:0016798]		sphingomyelin catabolic process [GO:0006685]
MDBSrug1_09502.1	0.230772	0.292783	NaN	NaN				hydrolase activity, acting on carbon-nitrogen (but not peptide) bonds [GO:0016810]	integral component of membrane [GO:0016021]
MDBSrug1_01616.1	0.227557	0.06893	NaN	NaN					cytoplasm [GO:0005737]; integral component of membrane [GO:0016021]	transmembrane transport [GO:0055085]
MDBSrug1_11026.1	0.226583	0.209624	NaN	NaN				transferase activity [GO:0016740]	integral component of membrane [GO:0016021]	fatty acid biosynthetic process [GO:0006633]
MDBSrug1_08484.1	0.223389	0.0543227	NaN	NaN				substrate-specific transmembrane transporter activity [GO:0022891]	integral component of membrane [GO:0016021]	carbohydrate transport [GO:0008643]; transmembrane transport [GO:0055085]
MDBSrug1_12544.1	0.220554	0.0746955	NaN	NaN				transporter activity [GO:0005215]	endoplasmic reticulum [GO:0005783]; integral component of membrane [GO:0016021]	sodium ion transport [GO:0006814]; transmembrane transport [GO:0055085]
MDBSrug1_00929.1	0.219742	0.12033	NaN	NaN				hydrolase activity [GO:0016787]
MDBSrug1_02860.1	0.217449	0.487416	NaN	NaN					U2 snRNP [GO:0005686]; cytosol [GO:0005829]	spliceosomal complex assembly [GO:0000245]
MDBSrug1_00670.1	0.216173	0.198224	NaN	NaN				oxidoreductase activity [GO:0016491]	membrane [GO:0016020]
MDBSrug1_09558.1	0.214936	0.133216	NaN	NaN				hydrolase activity [GO:0016787]
MDBSrug1_06881.1	0.214057	0.472123	NaN	NaN
MDBSrug1_12013.1	0.213617	0.29757	NaN	NaN				hydrolase activity, hydrolyzing O-glycosyl compounds [GO:0004553]	integral component of membrane [GO:0016021]	carbohydrate metabolic process [GO:0005975]
MDBSrug1_07273.1	0.213111	0.719237	NaN	NaN
MDBSrug1_03243.1	0.212958	0.347388	NaN	NaN
MDBSrug1_01718.1;MDBSrug1_04477.1	0.209049	0.156101	NaN	NaN				substrate-specific transmembrane transporter activity [GO:0022891]	integral component of membrane [GO:0016021]	carbohydrate transport [GO:0008643]; transmembrane transport [GO:0055085]
MDBSrug1_04628.1	0.206947	0.226807	NaN	NaN				acid phosphatase activity [GO:0003993]; non-membrane spanning protein tyrosine phosphatase activity [GO:0004726]	cytoplasm [GO:0005737]	peptidyl-tyrosine dephosphorylation [GO:0035335]
MDBSrug1_09796.1	0.205068	0.301742	NaN	NaN
MDBSrug1_10207.1	0.205068	0.126688	NaN	NaN
MDBSrug1_12193.1	0.200159	0.223904	NaN	NaN
MDBSrug1_05868.1	0.198915	0.470558	NaN	NaN				nucleotide binding [GO:0000166]; mRNA binding [GO:0003729]; U1 snRNA binding [GO:0030619]	commitment complex [GO:0000243]; U1 snRNP [GO:0005685]; cytosol [GO:0005829]; viral nucleocapsid [GO:0019013]; U2-type prespliceosome [GO:0071004]	mRNA splicing, via spliceosome [GO:0000398]
MDBSrug1_12513.2	0.196569	0.141907	NaN	NaN
MDBSrug1_00188.1	0.195906	0.0626124	NaN	NaN				oxidoreductase activity [GO:0016491]		metabolic process [GO:0008152]
MDBSrug1_09952.1	0.194606	1.16858	NaN	NaN				arginase activity [GO:0004053]; metal ion binding [GO:0046872]		arginine metabolic process [GO:0006525]
MDBSrug1_04884.1	0.194368	0.100979	NaN	NaN				monooxygenase activity [GO:0004497]; iron ion binding [GO:0005506]; oxidoreductase activity, acting on paired donors, with incorporation or reduction of molecular oxygen [GO:0016705]; heme binding [GO:0020037]	integral component of membrane [GO:0016021]	oxidation-reduction process [GO:0055114]
MDBSrug1_05510.1	0.191774	0.307325	NaN	NaN
MDBSrug1_09781.1	0.190668	0.209454	NaN	NaN				copper ion binding [GO:0005507]; oxidoreductase activity [GO:0016491]	integral component of membrane [GO:0016021]	oxidation-reduction process [GO:0055114]
MDBSrug1_03944.1	0.188754	0.0804667	NaN	NaN
MDBSrug1_09521.1	0.187971	0.063967	NaN	NaN				iron ion binding [GO:0005506]; oxidoreductase activity, acting on paired donors, with incorporation or reduction of molecular oxygen [GO:0016705]; L-ascorbic acid binding [GO:0031418]		oxidation-reduction process [GO:0055114]
MDBSrug1_10655.1	0.187811	0.131998	NaN	NaN				GTPase activator activity [GO:0005096]	nucleus [GO:0005634]; cytosol [GO:0005829]; plasma membrane [GO:0005886]	adaptation of signaling pathway by response to pheromone involved in conjugation with cellular fusion [GO:0000754]; intracellular signal transduction [GO:0035556]; positive regulation of GTPase activity [GO:0043547]; negative regulation of pheromone-dependent signal transduction involved in conjugation with cellular fusion [GO:0090029]
MDBSrug1_00777.1	0.187315	0.143392	NaN	NaN				ATP binding [GO:0005524]; MAP kinase activity involved in conjugation with cellular fusion [GO:0038071]	nucleus [GO:0005634]; cytosol [GO:0005829]; mitotic spindle pole body [GO:0044732]	mitotic cell cycle arrest in response to pheromone [GO:0000751]; MAPK cascade involved in conjugation with cellular fusion [GO:0071507]
MDBSrug1_02343.1	0.18707	0.311616	NaN	NaN				calcium ion binding [GO:0005509]; oxidoreductase activity [GO:0016491]	integral component of membrane [GO:0016021]	oxidation-reduction process [GO:0055114]
MDBSrug1_01801.1	0.186106	0.160194	NaN	NaN					nuclear pore [GO:0005643]
MDBSrug1_12414.1	0.18489	0.335578	NaN	NaN				oxidoreductase activity, acting on the CH-CH group of donors [GO:0016627]	cytoplasm [GO:0005737]; integral component of membrane [GO:0016021]	lipid metabolic process [GO:0006629]; oxidation-reduction process [GO:0055114]
MDBSrug1_00771.1	0.182087	0.267923	NaN	NaN
MDBSrug1_00003.1	0.180283	0.3593	NaN	NaN				GTPase activity [GO:0003924]; signal transducer activity [GO:0004871]; GTP binding [GO:0005525]; G-protein beta/gamma-subunit complex binding [GO:0031683]		G-protein coupled receptor signaling pathway [GO:0007186]
MDBSrug1_06491.1	0.179067	0.150643	NaN	NaN				ferroxidase activity [GO:0004322]; ferric iron binding [GO:0008199]	mitochondrion [GO:0005739]	iron-sulfur cluster assembly [GO:0016226]; oxidation-reduction process [GO:0055114]
MDBSrug1_04506.1	0.179025	1.01725	NaN	NaN
MDBSrug1_04567.1	0.177462	0.128173	NaN	NaN
MDBSrug1_08749.1	0.176526	0.142442	NaN	NaN				enzyme binding [GO:0019899]; phosphatidylinositol-4-phosphate binding [GO:0070273]	nucleus [GO:0005634]; Golgi medial cisterna [GO:0005797]; cytosol [GO:0005829]; extrinsic component of membrane [GO:0019898]	retrograde vesicle-mediated transport, Golgi to ER [GO:0006890]; endoplasmic reticulum unfolded protein response [GO:0030968]; protein localization to Golgi apparatus [GO:0034067]; regulation of phosphatidylinositol dephosphorylation [GO:0060304]
MDBSrug1_07800.1	0.174172	0.285549	NaN	NaN				DNA binding [GO:0003677]; motor activity [GO:0003774]; ATP binding [GO:0005524]; transferase activity, transferring hexosyl groups [GO:0016758]	integral component of membrane [GO:0016021]; myosin complex [GO:0016459]
MDBSrug1_09661.1	0.173885	0.143136	NaN	NaN				RNA binding [GO:0003723]	nucleus [GO:0005634]	RNA processing [GO:0006396]; mRNA metabolic process [GO:0016071]; regulation of macromolecule metabolic process [GO:0060255]
MDBSrug1_01494.1	0.173623	0.117604	NaN	NaN
MDBSrug1_00210.1	0.1734	0.222379	NaN	NaN				pyruvate transmembrane transporter activity [GO:0050833]	integral component of mitochondrial inner membrane [GO:0031305]	mitochondrial pyruvate transport [GO:0006850]; pyruvate transmembrane transport [GO:1901475]
MDBSrug1_07084.1	0.171383	0.321873	NaN	NaN				transaminase activity [GO:0008483]; pyridoxal phosphate binding [GO:0030170]
MDBSrug1_11800.1	0.171117	0.618213	NaN	NaN				magnesium ion binding [GO:0000287]; ribose phosphate diphosphokinase activity [GO:0004749]; kinase activity [GO:0016301]		ribonucleoside monophosphate biosynthetic process [GO:0009156]; nucleotide biosynthetic process [GO:0009165]; phosphorylation [GO:0016310]
MDBSrug1_08593.1	0.170508	0.254872	NaN	NaN				nucleotide binding [GO:0000166]; RNA binding [GO:0003723]; U1 snRNP binding [GO:1990446]	nucleus [GO:0005634]	mRNA processing [GO:0006397]
MDBSrug1_04520.1	0.170391	0.206101	NaN	NaN				DNA binding [GO:0003677]; motor activity [GO:0003774]; ATP binding [GO:0005524]; transferase activity, transferring hexosyl groups [GO:0016758]	integral component of membrane [GO:0016021]; myosin complex [GO:0016459]
MDBSrug1_04718.1	0.166921	0.130364	NaN	NaN				phosphotransferase activity, alcohol group as acceptor [GO:0016773]; hydrolase activity, acting on glycosyl bonds [GO:0016798]
MDBSrug1_05598.1	0.165524	0.257923	NaN	NaN
MDBSrug1_04135.1	0.164642	0.151571	NaN	NaN				tubulin binding [GO:0015631]; unfolded protein binding [GO:0051082]	nucleus [GO:0005634]; cytosol [GO:0005829]; prefoldin complex [GO:0016272]; cell division site [GO:0032153]; cell tip [GO:0051286]	protein folding [GO:0006457]; tubulin complex assembly [GO:0007021]; regulation of conjugation with cellular fusion [GO:0031137]; positive regulation of transcription elongation from RNA polymerase II promoter [GO:0032968]
MDBSrug1_11256.1	0.164557	0.056395	NaN	NaN					integral component of membrane [GO:0016021]	transmembrane transport [GO:0055085]
MDBSrug1_01731.1	0.161462	0.192891	NaN	NaN
MDBSrug1_09266.1	0.161034	0.03742	NaN	NaN					membrane [GO:0016020]
MDBSrug1_09157.1	0.156468	0.607342	NaN	NaN				oxidoreductase activity [GO:0016491]		oxidation-reduction process [GO:0055114]
MDBSrug1_05587.1	0.156103	0.39333	NaN	NaN					COP9 signalosome [GO:0008180]	COP9 signalosome assembly [GO:0010387]; cullin deneddylation [GO:0010388]
MDBSrug1_08550.1	0.155919	0.211252	NaN	NaN
MDBSrug1_10099.1	0.155607	0.150142	NaN	NaN				dioxygenase activity [GO:0051213]		oxidation-reduction process [GO:0055114]
MDBSrug1_06625.1	0.15487	0.181013	NaN	NaN				metal ion binding [GO:0046872]
MDBSrug1_01931.1	0.154331	0.0883893	NaN	NaN				catalytic activity [GO:0003824]		metabolic process [GO:0008152]
MDBSrug1_09439.1	0.153938	0.201998	NaN	NaN				zinc ion binding [GO:0008270]; thiol-dependent ubiquitinyl hydrolase activity [GO:0036459]		protein deubiquitination [GO:0016579]
MDBSrug1_00267.1	0.149908	0.130341	NaN	NaN				nucleic acid binding [GO:0003676]; ATP-dependent RNA helicase activity [GO:0004004]; ATP binding [GO:0005524]	U2-type spliceosomal complex [GO:0005684]; post-mRNA release spliceosomal complex [GO:0071014]	spliceosomal complex disassembly [GO:0000390]; maturation of SSU-rRNA from tricistronic rRNA transcript (SSU-rRNA, 5.8S rRNA, LSU-rRNA) [GO:0000462]; maturation of LSU-rRNA from tricistronic rRNA transcript (SSU-rRNA, 5.8S rRNA, LSU-rRNA) [GO:0000463]; maturation of 5.8S rRNA from tricistronic rRNA transcript (SSU-rRNA, 5.8S rRNA, LSU-rRNA) [GO:0000466]
MDBSrug1_06357.1	0.147618	0.0779511	NaN	NaN				DNA helicase activity [GO:0003678]; chromatin binding [GO:0003682]; DNA replication origin binding [GO:0003688]; ATP binding [GO:0005524]; ATPase activity [GO:0016887]	chromosome, telomeric region [GO:0000781]; nuclear chromatin [GO:0000790]; nuclear pre-replicative complex [GO:0005656]; cytosol [GO:0005829]; integral component of membrane [GO:0016021]; DNA replication preinitiation complex [GO:0031261]; replication fork protection complex [GO:0031298]; MCM complex [GO:0042555]	double-strand break repair via break-induced replication [GO:0000727]; pre-replicative complex assembly involved in nuclear cell cycle DNA replication [GO:0006267]; DNA replication initiation [GO:0006270]; DNA strand elongation involved in DNA replication [GO:0006271]; chromatin silencing at telomere [GO:0006348]; chromatin silencing at silent mating-type cassette [GO:0030466]; DNA duplex unwindi…
MDBSrug1_08167.1	0.147427	0.0180882	NaN	NaN					cell part [GO:0044464]
MDBSrug1_09269.1	0.145906	0.00905122	NaN	NaN
MDBSrug1_09002.1	0.145463	0.130524	NaN	NaN				sphinganine-1-phosphate aldolase activity [GO:0008117]; transferase activity [GO:0016740]; carboxy-lyase activity [GO:0016831]; pyridoxal phosphate binding [GO:0030170]	cortical endoplasmic reticulum [GO:0032541]; perinuclear endoplasmic reticulum [GO:0097038]	sphingolipid metabolic process [GO:0006665]; cellular response to starvation [GO:0009267]; calcium-mediated signaling [GO:0019722]; carboxylic acid metabolic process [GO:0019752]
MDBSrug1_03032.1	0.144744	0.158082	NaN	NaN				catalytic activity [GO:0003824]	integral component of membrane [GO:0016021]	cellular amino acid catabolic process [GO:0009063]
MDBSrug1_08846.1	0.144272	0.104991	NaN	NaN						cellular metabolic process [GO:0044237]
MDBSrug1_01521.1	0.142996	0.158384	NaN	NaN				L-histidine transmembrane transporter activity [GO:0005290]; L-lysine transmembrane transporter activity [GO:0015189]; L-arginine transmembrane transporter activity [GO:0061459]	vacuolar membrane [GO:0005774]; endoplasmic reticulum [GO:0005783]; integral component of membrane [GO:0016021]	L-lysine transmembrane export from vacuole [GO:0089707]; L-histidine transmembrane export from vacuole [GO:0089708]; L-arginine transmembrane export from vacuole [GO:1990818]
MDBSrug1_03707.1	0.142238	0.368156	NaN	NaN				transferase activity, transferring acyl groups [GO:0016746]	integral component of membrane [GO:0016021]	metabolic process [GO:0008152]
MDBSrug1_12008.2	0.141855	0.114422	NaN	NaN					late endosome [GO:0005770]	protein targeting to vacuole [GO:0006623]; late endosome to vacuole transport via multivesicular body sorting pathway [GO:0032511]
MDBSrug1_04047.1;MDBSrug1_09924.1	0.14071	0.0899886	NaN	NaN				oxidoreductase activity [GO:0016491]		DNA repair [GO:0006281]; DNA dealkylation [GO:0035510]; oxidation-reduction process [GO:0055114]
MDBSrug1_06188.1	0.140466	0.0752191	NaN	NaN
MDBSrug1_00285.1	0.140427	0.294878	NaN	NaN				hydrolase activity [GO:0016787]	Golgi apparatus [GO:0005794]; integral component of membrane [GO:0016021]; late endosome membrane [GO:0031902]	protein transport [GO:0015031]
MDBSrug1_00067.1	0.136897	0.113751	NaN	NaN				transferase activity, transferring acyl groups, acyl groups converted into alkyl on transfer [GO:0046912]		tricarboxylic acid cycle [GO:0006099]
MDBSrug1_12189.1	0.136252	0.230581	NaN	NaN
MDBSrug1_12301.1	0.133778	0.405509	NaN	NaN				acetate-CoA ligase activity [GO:0003987]; ATP binding [GO:0005524]; AMP binding [GO:0016208]	nucleus [GO:0005634]; cytoplasm [GO:0005737]	acetyl-CoA biosynthetic process from acetate [GO:0019427]
MDBSrug1_07574.1	0.133696	0.248674	NaN	NaN				glutaminase activity [GO:0004359]; transferase activity [GO:0016740]		glutamine metabolic process [GO:0006541]; vitamin B6 biosynthetic process [GO:0042819]; pyridoxal phosphate biosynthetic process [GO:0042823]
MDBSrug1_06176.1	0.132179	0.115976	NaN	NaN				ubiquitin-protein transferase activity [GO:0004842]; ligase activity [GO:0016874]		protein ubiquitination [GO:0016567]
MDBSrug1_04327.1	0.131711	0.0821002	NaN	NaN				sedoheptulose-bisphosphatase activity [GO:0050278]		dephosphorylation [GO:0016311]; ribose phosphate biosynthetic process [GO:0046390]
MDBSrug1_04973.1	0.130775	0.0826352	NaN	NaN				MAP kinase activity [GO:0004707]; ATP binding [GO:0005524]	intracellular [GO:0005622]	MAPK cascade [GO:0000165]
MDBSrug1_04590.1	0.130722	0.0917302	NaN	NaN					integral component of membrane [GO:0016021]	lipid metabolic process [GO:0006629]
MDBSrug1_12472.1	0.12856	0.105544	NaN	NaN				chitin synthase activity [GO:0004100]	endoplasmic reticulum [GO:0005783]; integral component of membrane [GO:0016021]	chitin biosynthetic process [GO:0006031]
MDBSrug1_07026.1	0.128029	0.0800968	NaN	NaN
MDBSrug1_09714.1	0.125019	0.263762	NaN	NaN				cysteine-tRNA ligase activity [GO:0004817]; ATP binding [GO:0005524]	cytoplasm [GO:0005737]	cysteinyl-tRNA aminoacylation [GO:0006423]
MDBSrug1_12488.1	0.124977	0.182721	NaN	NaN				N-acetyltransferase activity [GO:0008080]
MDBSrug1_06123.1	0.123304	0.249414	NaN	NaN				hydrolase activity, hydrolyzing N-glycosyl compounds [GO:0016799]	membrane [GO:0016020]
MDBSrug1_10380.1	0.122411	0.0818497	NaN	NaN				serine-type peptidase activity [GO:0008236]	signal peptidase complex [GO:0005787]; integral component of membrane [GO:0016021]	signal peptide processing [GO:0006465]; protein targeting to ER [GO:0045047]
MDBSrug1_07265.1	0.122131	0.0694195	NaN	NaN
MDBSrug1_11539.1	0.118136	0.517923	NaN	NaN				lyase activity [GO:0016829]	membrane [GO:0016020]
MDBSrug1_06714.1	0.115914	0.122567	NaN	NaN				protein serine/threonine kinase activity [GO:0004674]; ATP binding [GO:0005524]		protein phosphorylation [GO:0006468]
MDBSrug1_03325.1;MDBSrug1_04773.1	0.112781	0.0495413	NaN	NaN				protein serine/threonine kinase activity [GO:0004674]; MAP kinase kinase activity [GO:0004708]; protein tyrosine kinase activity [GO:0004713]; ATP binding [GO:0005524]	nucleus [GO:0005634]; cytosol [GO:0005829]; cell septum [GO:0030428]	activation of MAPK activity [GO:0000187]; peptidyl-tyrosine phosphorylation [GO:0018108]; positive regulation of calcium-mediated signaling involved in cellular response to salt stress [GO:1901196]
MDBSrug1_11496.1	0.110477	0.346323	NaN	NaN				ubiquitin protein ligase binding [GO:0031625]	cullin-RING ubiquitin ligase complex [GO:0031461]	ubiquitin-dependent protein catabolic process [GO:0006511]
MDBSrug1_07907.1	0.103927	0.135874	NaN	NaN
MDBSrug1_00194.1	0.1038	0.0959135	NaN	NaN					membrane [GO:0016020]
MDBSrug1_06130.1	0.0973595	0.243295	NaN	NaN				polyphosphate kinase activity [GO:0008976]	endoplasmic reticulum [GO:0005783]; integral component of membrane [GO:0016021]; intrinsic component of vacuolar membrane [GO:0031310]; vacuolar transporter chaperone complex [GO:0033254]	polyphosphate metabolic process [GO:0006797]; vacuolar transport [GO:0007034]; lysosomal microautophagy [GO:0016237]; phosphorylation [GO:0016310]; vacuole fusion, non-autophagic [GO:0042144]
MDBSrug1_00315.1	0.0970405	0.11745	NaN	NaN				binding [GO:0005488]; phosphoric diester hydrolase activity [GO:0008081]; ligase activity [GO:0016874]	intracellular part [GO:0044424]	RNA splicing, via endonucleolytic cleavage and ligation [GO:0000394]
MDBSrug1_04478.1	0.0948926	0.0804952	NaN	NaN				protein transporter activity [GO:0008565]; phosphatidylinositol-3-phosphate binding [GO:0032266]	nucleus [GO:0005634]; endosome [GO:0005768]; cytosol [GO:0005829]; retromer, tubulation complex [GO:0030905]	intracellular protein transport [GO:0006886]; retrograde transport, endosome to Golgi [GO:0042147]
MDBSrug1_03889.1	0.0927766	0.0919522	NaN	NaN					mitochondrial matrix [GO:0005759]	mitochondrial electron transport, succinate to ubiquinone [GO:0006121]; protein-FAD linkage [GO:0018293]
MDBSrug1_12701.1	0.0896328	0.119203	NaN	NaN					integral component of membrane [GO:0016021]	transport [GO:0006810]
MDBSrug1_11134.1	0.0864996	0.0759419	NaN	NaN				DNA binding [GO:0003677]; ATP binding [GO:0005524]	nucleus [GO:0005634]; cytosol [GO:0005829]; Elg1 RFC-like complex [GO:0031391]	DNA strand elongation involved in DNA replication [GO:0006271]; UV-damage excision repair [GO:0070914]
MDBSrug1_00392.1	0.0864713	0.15687	NaN	NaN				DNA binding [GO:0003677]; zinc ion binding [GO:0008270]	nucleus [GO:0005634]
MDBSrug1_04107.1	0.0856348	0.0821798	NaN	NaN				hydrolase activity [GO:0016787]; metal ion binding [GO:0046872]	cytosol [GO:0005829]	negative regulation of transcription from RNA polymerase II promoter in response to iron [GO:0034396]
MDBSrug1_10115.1	0.0838378	0.24576	NaN	NaN					integral component of membrane [GO:0016021]
MDBSrug1_05475.1	0.0827568	0.0718668	NaN	NaN				protein serine/threonine phosphatase activity [GO:0004722]		protein dephosphorylation [GO:0006470]
MDBSrug1_11082.1	0.0821188	0.122806	NaN	NaN				ATP binding [GO:0005524]; ATPase activity [GO:0016887]
MDBSrug1_09466.1	0.0802687	0.197803	NaN	NaN				carboxypeptidase activity [GO:0004180]
MDBSrug1_01403.1	0.0799213	0.131332	NaN	NaN				mitochondrion targeting sequence binding [GO:0030943]; identical protein binding [GO:0042802]	mitochondrial inner membrane presequence translocase complex [GO:0005744]	protein import into mitochondrial matrix [GO:0030150]; regulation of mitochondrial membrane permeability [GO:0046902]
MDBSrug1_06935.1	0.0798292	0.0524678	NaN	NaN				hydrolase activity, acting on carbon-nitrogen (but not peptide) bonds [GO:0016810]	membrane [GO:0016020]
MDBSrug1_00649.1	0.0756929	0.0735174	NaN	NaN				hydrolase activity [GO:0016787]	nuclear pore [GO:0005643]	macromolecule localization [GO:0033036]; ribonucleoprotein complex export from nucleus [GO:0071426]; organic substance transport [GO:0071702]
MDBSrug1_03989.1	0.074144	0.0401571	NaN	NaN					cell part [GO:0044464]
MDBSrug1_06638.1	0.0717374	0.194331	NaN	NaN				protein serine/threonine kinase activity [GO:0004674]; ATP binding [GO:0005524]; identical protein binding [GO:0042802]	incipient cellular bud site [GO:0000131]; nucleus [GO:0005634]; cytosol [GO:0005829]; cellular bud tip [GO:0005934]; cellular bud neck [GO:0005935]; mating projection tip [GO:0043332]; cell cortex of cell tip [GO:0051285]	microtubule cytoskeleton organization [GO:0000226]; cell separation after cytokinesis [GO:0000920]; protein phosphorylation [GO:0006468]; budding cell apical bud growth [GO:0007118]; establishment or maintenance of actin cytoskeleton polarity [GO:0030950]; positive regulation of bipolar cell growth [GO:0051518]; regulation of fungal-type cell wall organization [GO:0060237]; cellular response to o…
MDBSrug1_08731.1	0.0694655	0.0493073	NaN	NaN				nucleotide binding [GO:0000166]; RNA binding [GO:0003723]	nuclear chromosome [GO:0000228]; cytosol [GO:0005829]; Mei2 nuclear dot complex [GO:0033620]; Tor2-Mei2-Ste11 complex [GO:0034064]	premeiotic DNA replication [GO:0006279]; meiosis I [GO:0007127]; positive regulation of meiotic cell cycle [GO:0051446]
MDBSrug1_08748.1	0.0693273	0.0697439	NaN	NaN					cell part [GO:0044464]	regulation of cell cycle [GO:0051726]
MDBSrug1_01964.1	0.0692848	0.162903	NaN	NaN
MDBSrug1_06936.1	0.0681399	0.00831873	NaN	NaN				motor activity [GO:0003774]; ATP binding [GO:0005524]; actin filament binding [GO:0051015]	myosin complex [GO:0016459]
MDBSrug1_00603.1	0.067424	0.037527	NaN	NaN				nucleotide binding [GO:0000166]; U6 snRNA binding [GO:0017070]	U6 snRNP [GO:0005688]	spliceosomal tri-snRNP complex assembly [GO:0000244]; spliceosomal complex assembly [GO:0000245]
MDBSrug1_03880.1	0.0659708	0.0450159	NaN	NaN				nucleotide binding [GO:0000166]; nucleic acid binding [GO:0003676]; zinc ion binding [GO:0008270]
MDBSrug1_10833.1	0.0646133	0.127547	NaN	NaN				CAAX-protein geranylgeranyltransferase activity [GO:0004662]	nucleus [GO:0005634]; cytosol [GO:0005829]; CAAX-protein geranylgeranyltransferase complex [GO:0005953]	glucan biosynthetic process [GO:0009250]; protein geranylgeranylation [GO:0018344]
MDBSrug1_05439.1;MDBSrug1_01978.2	0.0611186	0.123717	NaN	NaN				oxidoreductase activity, acting on CH-OH group of donors [GO:0016614]; flavin adenine dinucleotide binding [GO:0050660]		oxidation-reduction process [GO:0055114]
MDBSrug1_06326.1	0.060509	0.035152	NaN	NaN				galactokinase activity [GO:0004335]; ATP binding [GO:0005524]	cytosol [GO:0005829]; membrane [GO:0016020]	galactose metabolic process [GO:0006012]; carbohydrate phosphorylation [GO:0046835]
MDBSrug1_01691.1	0.059669	0.111269	NaN	NaN				RNA binding [GO:0003723]	U1 snRNP [GO:0005685]; U2-type prespliceosome [GO:0071004]	mRNA splicing, via spliceosome [GO:0000398]
MDBSrug1_00381.1	0.0589034	0.292356	NaN	NaN				serine-type peptidase activity [GO:0008236]
MDBSrug1_01845.1	0.0572198	0.0272806	NaN	NaN					cell [GO:0005623]; integral component of membrane [GO:0016021]	cell redox homeostasis [GO:0045454]
MDBSrug1_12378.1	0.0571631	0.0584633	NaN	NaN				phosphoribosylformylglycinamidine synthase activity [GO:0004642]	Golgi apparatus [GO:0005794]	'de novo' IMP biosynthetic process [GO:0006189]
MDBSrug1_10162.1	0.055632	0.0799715	NaN	NaN					origin recognition complex [GO:0000808]; nucleus [GO:0005634]; integral component of membrane [GO:0016021]	DNA replication [GO:0006260]; transmembrane transport [GO:0055085]
MDBSrug1_09152.1;MDBSrug1_06313.1	0.0551499	0.0976835	NaN	NaN				1,3-beta-D-glucan synthase activity [GO:0003843]; GTPase activity [GO:0003924]; GTP binding [GO:0005525]	1,3-beta-D-glucan synthase complex [GO:0000148]; fungal-type vacuole membrane [GO:0000329]; mitochondrial intermembrane space [GO:0005758]; integral component of membrane [GO:0016021]; mitochondrial crista [GO:0030061]; intrinsic component of mitochondrial inner membrane [GO:0031304]; extrinsic component of mitochondrial inner membrane [GO:0031314]; mitochondrial inner boundary membrane [GO:00970…	mitochondrion inheritance [GO:0000001]; mitochondrial genome maintenance [GO:0000002]; (1->3)-beta-D-glucan biosynthetic process [GO:0006075]; mitochondrial membrane organization [GO:0007006]; mitochondrial fusion [GO:0008053]
MDBSrug1_01647.1	0.0528461	0.0429209	NaN	NaN
MDBSrug1_00877.1	0.0520664	0.40387	NaN	NaN				binding [GO:0005488]
MDBSrug1_04546.1	0.0513823	0.088395	NaN	NaN				nucleotide binding [GO:0000166]; nucleic acid binding [GO:0003676]
MDBSrug1_01857.1	0.0512937	0.0263523	NaN	NaN
MDBSrug1_06717.1	0.0512937	0.0187217	NaN	NaN				chromatin binding [GO:0003682]; DNA replication origin binding [GO:0003688]; single-stranded DNA binding [GO:0003697]; transcription cofactor activity [GO:0003712]; RNA helicase activity [GO:0003724]; single-stranded RNA binding [GO:0003727]; ATP binding [GO:0005524]; four-way junction helicase activity [GO:0009378]; 3'-5' DNA/RNA helicase activity [GO:0033679]; single-stranded DNA-dependent ATP-…	chromosome, telomeric region [GO:0000781]; nuclear chromatin [GO:0000790]; nuclear pre-replicative complex [GO:0005656]; cytoplasm [GO:0005737]; DNA replication preinitiation complex [GO:0031261]; replication fork protection complex [GO:0031298]; MCM complex [GO:0042555]; MCM core complex [GO:0097373]	double-strand break repair via break-induced replication [GO:0000727]; pre-replicative complex assembly involved in nuclear cell cycle DNA replication [GO:0006267]; DNA unwinding involved in DNA replication [GO:0006268]; DNA replication initiation [GO:0006270]; DNA strand elongation involved in DNA replication [GO:0006271]; chromatin silencing at telomere [GO:0006348]; regulation of transcription…
MDBSrug1_06605.1	0.0505139	0.222783	NaN	NaN					intracellular [GO:0005622]	intracellular protein transport [GO:0006886]
MDBSrug1_07156.1	0.0496456	0.0129977	NaN	NaN
MDBSrug1_02969.1	0.0493691	0.147763	NaN	NaN				alternative oxidase activity [GO:0009916]; metal ion binding [GO:0046872]	integral component of membrane [GO:0016021]; respiratory chain [GO:0070469]	oxidation-reduction process [GO:0055114]
MDBSrug1_06151.1	0.048802	0.0482385	NaN	NaN				zinc ion binding [GO:0008270]; oxidoreductase activity [GO:0016491]	membrane [GO:0016020]	oxidation-reduction process [GO:0055114]
MDBSrug1_02255.1	0.0469802	0.229141	NaN	NaN				mannosyl-oligosaccharide glucosidase activity [GO:0004573]	cytoplasm [GO:0005737]	oligosaccharide metabolic process [GO:0009311]
MDBSrug1_06092.1	0.0455731	0.0883779	NaN	NaN				ATP binding [GO:0005524]; ATPase activity [GO:0016887]	nucleus [GO:0005634]; mitochondrion [GO:0005739]; cytosol [GO:0005829]; polysome [GO:0005844]; integral component of membrane [GO:0016021]	poly(A)+ mRNA export from nucleus [GO:0016973]; ribosomal small subunit biogenesis [GO:0042274]
MDBSrug1_12467.1	0.0435741	0.0564843	NaN	NaN					ER membrane protein complex [GO:0072546]
MDBSrug1_02299.1	0.0427306	0.0432015	NaN	NaN
MDBSrug1_04144.1	0.0422131	0.254001	NaN	NaN				peroxidase activity [GO:0004601]; heme binding [GO:0020037]; metal ion binding [GO:0046872]	integral component of membrane [GO:0016021]	response to oxidative stress [GO:0006979]; oxidation-reduction process [GO:0055114]; cellular oxidant detoxification [GO:0098869]
MDBSrug1_00749.1	0.0396257	0.0471332	NaN	NaN				AMP deaminase activity [GO:0003876]	cytosol [GO:0005829]	guanine salvage [GO:0006178]; IMP salvage [GO:0032264]
MDBSrug1_07098.1	0.0391189	0.0225282	NaN	NaN
MDBSrug1_07908.1	0.0385305	0.0276295	NaN	NaN
MDBSrug1_11303.1	0.0375629	0.177769	NaN	NaN				protein anchor [GO:0043495]	nuclear envelope lumen [GO:0005641]; integral component of membrane [GO:0016021]; nuclear pore transmembrane ring [GO:0070762]	protein import into nucleus [GO:0006606]; nuclear pore organization [GO:0006999]; spindle pole body duplication [GO:0030474]
MDBSrug1_06286.1	0.0355781	0.212214	NaN	NaN				oxidoreductase activity [GO:0016491]	integral component of membrane [GO:0016021]	oxidation-reduction process [GO:0055114]
MDBSrug1_05105.1	0.0335886	0.0433631	NaN	NaN				cyclin-dependent protein serine/threonine kinase activity [GO:0004693]; ATP binding [GO:0005524]	cyclin-dependent protein kinase holoenzyme complex [GO:0000307]; nucleus [GO:0005634]; cytosol [GO:0005829]	regulation of transcription involved in G1/S transition of mitotic cell cycle [GO:0000083]; negative regulation of transcription from RNA polymerase II promoter [GO:0000122]; protein phosphorylation [GO:0006468]; cellular response to DNA damage stimulus [GO:0006974]; traversing start control point of mitotic cell cycle [GO:0007089]; positive regulation of macroautophagy [GO:0016239]; negative reg…
MDBSrug1_00261.1	0.0327316	0.0258913	NaN	NaN					nuclear chromatin [GO:0000790]; nucleolus [GO:0005730]; cytosol [GO:0005829]; mRNA cleavage and polyadenylation specificity factor complex [GO:0005847]	mRNA polyadenylation [GO:0006378]; mRNA cleavage [GO:0006379]
MDBSrug1_03355.1	0.0325817	0.0212573	NaN	NaN				nucleic acid binding [GO:0003676]	nucleotide-excision repair complex [GO:0000109]	regulation of chromatin silencing [GO:0031935]
MDBSrug1_10919.1	0.0319395	0.00770404	NaN	NaN
MDBSrug1_04875.1	0.0318842	0.100689	NaN	NaN				lipid transporter activity [GO:0005319]	integral component of membrane [GO:0016021]	lipid transport [GO:0006869]
MDBSrug1_09088.1	0.0305898	0.0310006	NaN	NaN				oxoglutarate dehydrogenase (succinyl-transferring) activity [GO:0004591]; thiamine pyrophosphate binding [GO:0030976]		tricarboxylic acid cycle [GO:0006099]
MDBSrug1_11550.1	0.0299766	0.239835	NaN	NaN					nucleus [GO:0005634]	intracellular transport [GO:0046907]; regulation of biological process [GO:0050789]; cellular response to chemical stimulus [GO:0070887]
MDBSrug1_11620.1	0.0265797	0.0861639	NaN	NaN				structural constituent of nuclear pore [GO:0017056]	chromosome, telomeric region [GO:0000781]; cytosol [GO:0005829]; nuclear pore outer ring [GO:0031080]; nuclear membrane [GO:0031965]; nuclear periphery [GO:0034399]	negative regulation of transcription from RNA polymerase II promoter [GO:0000122]; posttranscriptional tethering of RNA polymerase II gene DNA at nuclear periphery [GO:0000973]; double-strand break repair [GO:0006302]; tRNA export from nucleus [GO:0006409]; protein import into nucleus [GO:0006606]; nuclear pore organization [GO:0006999]; poly(A)+ mRNA export from nucleus [GO:0016973]; chromatin s…
MDBSrug1_05153.1	0.0265457	0.0284326	NaN	NaN
MDBSrug1_00967.1	0.0256833	0.184519	NaN	NaN				zinc ion binding [GO:0008270]; guanine deaminase activity [GO:0008892]		guanine catabolic process [GO:0006147]
MDBSrug1_03835.2	0.0245679	0.0504883	NaN	NaN					clathrin adaptor complex [GO:0030131]	intracellular protein transport [GO:0006886]; vesicle-mediated transport [GO:0016192]
MDBSrug1_06906.1	0.0217491	0.0360877	NaN	NaN				zinc ion binding [GO:0008270]; pre-mRNA binding [GO:0036002]	cytosol [GO:0005829]; mRNA cleavage and polyadenylation specificity factor complex [GO:0005847]	mRNA polyadenylation [GO:0006378]; mRNA cleavage [GO:0006379]; protein ubiquitination [GO:0016567]
MDBSrug1_12503.1	0.0207822	0.0255726	NaN	NaN				protein domain specific binding [GO:0019904]	mitochondrion [GO:0005739]	mitochondrial proton-transporting ATP synthase complex assembly [GO:0033615]
MDBSrug1_00552.1	0.0207362	0.0206733	NaN	NaN				chromatin binding [GO:0003682]; ATP binding [GO:0005524]	nucleus [GO:0005634]; chromosome [GO:0005694]; integral component of membrane [GO:0016021]	DNA repair [GO:0006281]; mitotic sister chromatid cohesion [GO:0007064]
MDBSrug1_09780.1	0.0196615	0.0223756	NaN	NaN
MDBSrug1_08709.1	0.0192149	0.0176124	NaN	NaN				RNA polymerase II transcription factor activity, sequence-specific DNA binding [GO:0000981]; DNA binding [GO:0003677]; zinc ion binding [GO:0008270]	nucleus [GO:0005634]	regulation of transcription from RNA polymerase II promoter [GO:0006357]
MDBSrug1_07954.1	0.0190469	0.0075498	NaN	NaN
MDBSrug1_05356.1	0.0172209	0.0173301	NaN	NaN
MDBSrug1_09093.1	0.0156341	0.0744109	NaN	NaN				nucleic acid binding [GO:0003676]; ATP binding [GO:0005524]
MDBSrug1_11227.1	0.0153388	0.00418634	NaN	NaN				nucleotide binding [GO:0000166]
MDBSrug1_03008.1	0.0113025	0.011276	NaN	NaN				DNA binding [GO:0003677]; helicase activity [GO:0004386]; ATP binding [GO:0005524]; zinc ion binding [GO:0008270]	cytoplasm [GO:0005737]	nuclear-transcribed mRNA catabolic process, nonsense-mediated decay [GO:0000184]
MDBSrug1_11123.1	0.00955058	0.00438793	NaN	NaN					Elongator holoenzyme complex [GO:0033588]	tRNA wobble uridine modification [GO:0002098]; regulation of transcription, DNA-templated [GO:0006355]
MDBSrug1_05173.1	0.00876976	0.00872851	NaN	NaN				DNA binding [GO:0003677]; translation elongation factor activity [GO:0003746]	chromatin [GO:0000785]; nucleus [GO:0005634]; chromosomal region [GO:0098687]	negative regulation of transcription from RNA polymerase II promoter [GO:0000122]; chromatin remodeling [GO:0006338]; chromatin silencing [GO:0006342]; translational elongation [GO:0006414]; chromatin assembly [GO:0031497]; macromolecule localization [GO:0033036]; regulation of transcription elongation from RNA polymerase II promoter [GO:0034243]; nucleosome organization [GO:0034728]; regulation …
MDBSrug1_03731.1	0.00835436	0.114371	NaN	NaN				guanosine-diphosphatase activity [GO:0004382]; ATPase activity [GO:0016887]; adenosine-diphosphatase activity [GO:0043262]; uridine-diphosphatase activity [GO:0045134]	endoplasmic reticulum [GO:0005783]; Golgi apparatus [GO:0005794]; integral component of membrane [GO:0016021]	UDP catabolic process [GO:0006256]; protein N-linked glycosylation [GO:0006487]; GDP catabolic process [GO:0046712]
MDBSrug1_04619.1	0.00816722	0.00307518	NaN	NaN
MDBSrug1_03159.1	0.00804813	0.0100108	NaN	NaN					plasma membrane [GO:0005886]
MDBSrug1_03272.1	0.00757248	0.0103045	NaN	NaN				signal transducer activity [GO:0004871]	peroxisomal membrane [GO:0005778]	protein targeting to Golgi [GO:0000042]; phosphorelay signal transduction system [GO:0000160]; protein import into peroxisome matrix, docking [GO:0016560]
MDBSrug1_04933.1	0.00733501	0.00797097	NaN	NaN				ATPase activity [GO:0016887]	Mre11 complex [GO:0030870]	telomere maintenance [GO:0000723]; DNA repair [GO:0006281]
MDBSrug1_11615.1	0.00702453	0.00475117	NaN	NaN				phosphorelay sensor kinase activity [GO:0000155]; nucleic acid binding [GO:0003676]; ATP binding [GO:0005524]; hydrolase activity [GO:0016787]	intracellular [GO:0005622]	phosphorelay signal transduction system [GO:0000160]; DNA repair [GO:0006281]; signal transduction by protein phosphorylation [GO:0023014]
MDBSrug1_05352.1	0.00665095	0.0621457	NaN	NaN					cytoplasm [GO:0005737]
MDBSrug1_06239.1	0.00476785	0.00611611	NaN	NaN				microtubule motor activity [GO:0003777]		microtubule-based movement [GO:0007018]
MDBSrug1_05210.1	0.00324371	0.0106739	NaN	NaN				nucleotide binding [GO:0000166]
MDBSrug1_05990.1	0.0021882	0.0132288	NaN	NaN					nuclear envelope [GO:0005635]	nucleocytoplasmic transport [GO:0006913]
