# Supplementary material for: Whole Genome Sequence of an Edible Mushroom Stropharia rugosoannulata (Daqiugaigu)
Source: J Fungi (Basel). 2022 Jan 20;8(2):99. doi: 10.3390/jof8020099 (PMC8880121; doi:10.3390/jof8020099)
Supplement: Supplementary file 1 [file jof-08-00099-s001.zip › Supplementary File(s)/Table S7.xlsx]

## Sheet: Sheet1
Table S7 GO classification of DAPs with lower abundance in Cap group compared with those in Sti group.
protein_id	Cap-1	Cap-2	Sti-1	Sti-2	foldChange_Cap-1_vs_Sti-1	p-value_Cap-1_vs_Sti-1	q_value_Cap-1_vs_Sti-1	MF	CC	BP
MDBSrug1_03748.1	18.3661	19.0939	40.5407	35.5625	2.03159	0.0761759	0.022265	oxidoreductase activity [GO:0016491]; heme binding [GO:0020037]; metal ion binding [GO:0046872]	integral component of membrane [GO:0016021]	transmembrane transport [GO:0055085]; oxidation-reduction process [GO:0055114]
MDBSrug1_08060.1	1.2637	0.975014	2.32703	2.2446	2.04208	0.0606912	0.0142858		Sec61 translocon complex [GO:0005784]; integral component of membrane [GO:0016021]	intracellular protein transport [GO:0006886]
MDBSrug1_06333.1	0.727759	0.866591	1.43481	1.8285	2.0468	0.117287	0.0474451	proton-transporting ATPase activity, rotational mechanism [GO:0046961]	vacuolar proton-transporting V-type ATPase, V1 domain [GO:0000221]; fungal-type vacuole membrane [GO:0000329]	ATP hydrolysis coupled proton transport [GO:0015991]
MDBSrug1_04711.1	8.23456	8.13944	16.9782	16.6219	2.05204	0.00817096	0.0003248	oxidoreductase activity [GO:0016491]; metal ion binding [GO:0046872]; flavin adenine dinucleotide binding [GO:0050660]; 2 iron, 2 sulfur cluster binding [GO:0051537]	cytosol [GO:0005829]	cell redox homeostasis [GO:0045454]; oxidation-reduction process [GO:0055114]
MDBSrug1_03887.1	47.3453	54.568	113.175	96.9998	2.06229	0.0575284	0.0128688	hydrolase activity [GO:0016787]
MDBSrug1_05761.1	6.47445	4.96522	12.6904	11.1847	2.08704	0.0281555	0.00359899
MDBSrug1_00260.1	0.144279	0.192174	0.385065	0.325786	2.11277	0.0425195	0.00772177
MDBSrug1_08885.1	0.704863	0.492931	1.11329	1.44946	2.13956	0.0952147	0.0333214
MDBSrug1_12723.1	52.1869	44.9368	107.863	101.305	2.15363	0.00779999	0.000279657	fatty-acyl-CoA binding [GO:0000062]; metal ion binding [GO:0046872]
MDBSrug1_04533.1	2.21181	1.6296	4.10216	4.23393	2.17006	0.0698947	0.0187947
MDBSrug1_12171.1	0.386298	0.488668	1.07723	0.855504	2.20892	0.0886645	0.0293014	nucleic acid binding [GO:0003676]
MDBSrug1_06249.1	2.97863	3.46927	6.61945	7.65092	2.21318	0.0459166	0.00866081	succinate dehydrogenase (ubiquinone) activity [GO:0008177]; flavin adenine dinucleotide binding [GO:0050660]	mitochondrial inner membrane [GO:0005743]	tricarboxylic acid cycle [GO:0006099]; electron transport chain [GO:0022900]
MDBSrug1_06576.1	19.9585	20.6898	49.3694	41.0257	2.22383	0.103605	0.0389224	ATP binding [GO:0005524]; unfolded protein binding [GO:0051082]; chaperone binding [GO:0051087]	mitochondrial matrix [GO:0005759]	protein refolding [GO:0042026]; protein import into mitochondrial intermembrane space [GO:0045041]; chaperone-mediated protein complex assembly [GO:0051131]
MDBSrug1_04224.1	0.233969	0.14313	0.405259	0.434583	2.22711	0.0979692	0.0349726		peroxisome [GO:0005777]	intracellular protein transport [GO:0006886]; peroxisome organization [GO:0007031]
MDBSrug1_09403.1	0.305508	0.289027	0.705071	0.624083	2.23562	0.0605827	0.0142131
MDBSrug1_10537.1	10.6663	6.24929	21.731	16.328	2.24993	0.0983816	0.0352732		integral component of membrane [GO:0016021]	transport [GO:0006810]
MDBSrug1_03235.1	0.839619	0.705748	1.70703	1.7957	2.2666	0.0110119	0.00055789	3-deoxy-7-phosphoheptulonate synthase activity [GO:0003849]		aromatic amino acid family biosynthetic process [GO:0009073]; chorismate biosynthetic process [GO:0009423]
MDBSrug1_01003.1	155.093	169.334	361.15	376.566	2.2739	0.00264453	3.09181e-05	glyceraldehyde-3-phosphate dehydrogenase (NAD+) (phosphorylating) activity [GO:0004365]; NADP binding [GO:0050661]; NAD binding [GO:0051287]	cytoplasm [GO:0005737]	glucose metabolic process [GO:0006006]; glycolytic process [GO:0006096]; oxidation-reduction process [GO:0055114]
MDBSrug1_00978.1	7.85745	4.44229	14.8267	13.2544	2.28307	0.0926687	0.0315637	dihydrolipoyl dehydrogenase activity [GO:0004148]; flavin adenine dinucleotide binding [GO:0050660]	cell [GO:0005623]	cell redox homeostasis [GO:0045454]; oxidation-reduction process [GO:0055114]
MDBSrug1_11319.1	4.8203	4.23791	10.8462	10.1464	2.31752	0.006532	0.000193465	peroxidase activity [GO:0004601]; iron ion binding [GO:0005506]; oxidoreductase activity, acting on paired donors, with incorporation or reduction of molecular oxygen [GO:0016705]; heme binding [GO:0020037]		response to oxidative stress [GO:0006979]; oxidation-reduction process [GO:0055114]; cellular oxidant detoxification [GO:0098869]
MDBSrug1_03100.1	0.516268	0.340245	0.97226	1.015	2.32018	0.0836002	0.0263898		Golgi apparatus [GO:0005794]; cytosol [GO:0005829]; ribosome [GO:0005840]
MDBSrug1_09396.1	4.90111	3.78867	10.4142	9.77985	2.32389	0.0238178	0.00258042	transferase activity [GO:0016740]	nucleus [GO:0005634]; Golgi apparatus [GO:0005794]; cytosol [GO:0005829]
MDBSrug1_04233.1	1.92383	1.59926	3.83696	4.37665	2.33136	0.029518	0.00398021	oxidoreductase activity [GO:0016491]	integral component of membrane [GO:0016021]	oxidation-reduction process [GO:0055114]
MDBSrug1_06303.1	4.43432	3.98822	9.95968	10.1614	2.38895	0.00865408	0.000357495	oxidoreductase activity [GO:0016491]		oxidation-reduction process [GO:0055114]
MDBSrug1_07745.1;MDBSrug1_12552.1	3.75452	3.10774	7.68428	8.78167	2.3995	0.0298304	0.00411533
MDBSrug1_02794.1	0.496881	0.658452	1.34179	1.44464	2.4118	0.0217075	0.00223335
MDBSrug1_08979.1	1.04207	0.664371	2.0975	2.01962	2.41269	0.0879349	0.0288547		integral component of membrane [GO:0016021]
MDBSrug1_07948.1	6.08492	6.20433	16.3125	13.3655	2.41495	0.106402	0.0411342	carbonyl reductase (NADPH) activity [GO:0004090]; oxidoreductase activity, acting on the aldehyde or oxo group of donors, NAD or NADP as acceptor [GO:0016620]; serine 3-dehydrogenase activity [GO:0031132]	nucleus [GO:0005634]; ribosome [GO:0005840]; integral component of membrane [GO:0016021]	oxidation-reduction process [GO:0055114]
MDBSrug1_04568.1	5.63479	5.48213	12.5702	14.5027	2.43529	0.0751455	0.0216124	hexokinase activity [GO:0004396]; ATP binding [GO:0005524]; glucose binding [GO:0005536]	cell [GO:0005623]	cellular glucose homeostasis [GO:0001678]; glycolytic process [GO:0006096]; carbohydrate phosphorylation [GO:0046835]
MDBSrug1_02109.1	0.294645	0.202749	0.598624	0.613663	2.43728	0.0747249	0.0212002	RNA binding [GO:0003723]
MDBSrug1_00467.1	4.87807	4.12009	10.7216	11.2654	2.44349	0.0074556	0.000249876
MDBSrug1_11430.1	1.41185	0.840979	3.09875	2.44492	2.46076	0.0648578	0.0160249	3-hydroxyisobutyryl-CoA hydrolase activity [GO:0003860]	mitochondrion [GO:0005739]	valine catabolic process [GO:0006574]
MDBSrug1_02789.1	0.141192	0.13646	0.337563	0.346195	2.46264	0.00240812	2.06464e-05	structural constituent of ribosome [GO:0003735]	mitochondrial large ribosomal subunit [GO:0005762]	aerobic respiration [GO:0009060]
MDBSrug1_02047.1	1.58163	0.878828	3.14391	2.93375	2.47014	0.0997549	0.0363876	actin binding [GO:0003779]	nucleus [GO:0005634]; mitochondrion [GO:0005739]; actomyosin contractile ring [GO:0005826]; cytosol [GO:0005829]; Arp2/3 protein complex [GO:0005885]; actin cortical patch [GO:0030479]; actin filament bundle [GO:0032432]; cell tip [GO:0051286]	endocytosis [GO:0006897]; Arp2/3 complex-mediated actin nucleation [GO:0034314]; establishment of mitochondrion localization [GO:0051654]; actin cortical patch localization [GO:0051666]; establishment or maintenance of cell polarity regulating cell shape [GO:0071963]
MDBSrug1_08205.1	27.7564	24.2504	65.022	68.1978	2.56158	0.00352164	4.94073e-05	protein disulfide oxidoreductase activity [GO:0015035]	cell [GO:0005623]	glycerol ether metabolic process [GO:0006662]; cell redox homeostasis [GO:0045454]; oxidation-reduction process [GO:0055114]
MDBSrug1_04734.1	7.5583	6.00512	19.5784	15.4823	2.58494	0.0876296	0.0286862
MDBSrug1_12296.1	2.42624	3.25282	7.59922	7.17048	2.60073	0.024439	0.00272391	glycolipid transporter activity [GO:0017089]; glycolipid binding [GO:0051861]	cytoplasm [GO:0005737]	glycolipid transport [GO:0046836]
MDBSrug1_04862.1	2.77298	3.02521	7.11469	8.25583	2.65091	0.0643334	0.0156947	coproporphyrinogen oxidase activity [GO:0004109]		porphyrin-containing compound biosynthetic process [GO:0006779]; oxidation-reduction process [GO:0055114]
MDBSrug1_01609.1	0.423619	0.84132	1.39701	2.02274	2.70349	0.12059	0.049533	sterol 24-C-methyltransferase activity [GO:0003838]	nucleus [GO:0005634]; mitochondrial outer membrane [GO:0005741]; endoplasmic reticulum [GO:0005783]; lipid particle [GO:0005811]	protein targeting to vacuole [GO:0006623]; ergosterol biosynthetic process [GO:0006696]; endocytosis [GO:0006897]; methylation [GO:0032259]; protein insertion into membrane raft [GO:0071210]
MDBSrug1_02355.1;MDBSrug1_05520.1;MDBSrug1_05055.1	0.162196	0.392385	0.640936	0.865396	2.71616	0.0977545	0.0348198			metabolic process [GO:0008152]
MDBSrug1_08814.1	10.2205	15.062	34.2601	34.6134	2.72416	0.0691119	0.0182611	structural constituent of ribosome [GO:0003735]; large ribosomal subunit rRNA binding [GO:0070180]	cytosolic large ribosomal subunit [GO:0022625]; preribosome, large subunit precursor [GO:0030687]	cytoplasmic translation [GO:0002181]; translational elongation [GO:0006414]
MDBSrug1_03116.1;MDBSrug1_03869.1	18.9863	19.2795	57.8282	47.6424	2.75626	0.0955273	0.0335798	magnesium ion binding [GO:0000287]; carboxy-lyase activity [GO:0016831]; thiamine pyrophosphate binding [GO:0030976]
MDBSrug1_12482.1	0.146048	0.173819	0.424233	0.457774	2.75742	0.00676932	0.000211047	ATP binding [GO:0005524]; ATPase activity, coupled to transmembrane movement of substances [GO:0042626]	vacuole [GO:0005773]; plasma membrane [GO:0005886]; integral component of membrane [GO:0016021]	drug transmembrane transport [GO:0006855]
MDBSrug1_01049.1	6.66867	4.54382	16.0247	15.0107	2.76793	0.0342001	0.00519799	structural constituent of ribosome [GO:0003735]	ribosome [GO:0005840]	translation [GO:0006412]
MDBSrug1_11590.1	0.988445	0.6214	2.41469	2.06357	2.7818	0.0300888	0.00417443	serine-type peptidase activity [GO:0008236]		proteolysis [GO:0006508]
MDBSrug1_11449.1	0.163217	0.264223	0.508636	0.682222	2.78602	0.0873531	0.0283914	oxidoreductase activity [GO:0016491]; metal ion binding [GO:0046872]	membrane [GO:0016020]
MDBSrug1_02111.1	0.197841	0.134365	0.49902	0.426596	2.78626	0.0263997	0.00310706	3'-5'-exoribonuclease activity [GO:0000175]; RNA binding [GO:0003723]; metal ion binding [GO:0046872]	cytoplasmic mRNA processing body [GO:0000932]	miRNA catabolic process [GO:0010587]; nuclear-transcribed mRNA catabolic process, exonucleolytic, 3'-5' [GO:0034427]; RNA phosphodiester bond hydrolysis, exonucleolytic [GO:0090503]; polyuridylation-dependent mRNA catabolic process [GO:1990074]
MDBSrug1_12141.1	1.88194	2.72903	7.40578	5.49929	2.79878	0.102258	0.0380182	succinate dehydrogenase (ubiquinone) activity [GO:0008177]; electron carrier activity [GO:0009055]; metal ion binding [GO:0046872]; 2 iron, 2 sulfur cluster binding [GO:0051537]; 3 iron, 4 sulfur cluster binding [GO:0051538]; 4 iron, 4 sulfur cluster binding [GO:0051539]	mitochondrial inner membrane [GO:0005743]	tricarboxylic acid cycle [GO:0006099]
MDBSrug1_04995.1	0.320022	0.383762	1.11333	0.860572	2.80469	0.108182	0.0422439	carbon-nitrogen ligase activity, with glutamine as amido-N-donor [GO:0016884]
MDBSrug1_07044.1	11.0335	7.94707	26.173	27.0789	2.8056	0.0414257	0.00732941	peptidyl-prolyl cis-trans isomerase activity [GO:0003755]		protein peptidyl-prolyl isomerization [GO:0000413]; protein folding [GO:0006457]
MDBSrug1_12699.1	18.1406	24.8287	66.3424	57.1539	2.87406	0.024475	0.002747
MDBSrug1_08680.1	3.29393	4.84724	12.8202	11.3497	2.96885	0.0174904	0.00132235	adenylate kinase activity [GO:0004017]; ATP binding [GO:0005524]	nucleus [GO:0005634]; mitochondrial intermembrane space [GO:0005758]; cytosol [GO:0005829]	ADP biosynthetic process [GO:0006172]; DNA replication initiation [GO:0006270]; AMP metabolic process [GO:0046033]; ATP metabolic process [GO:0046034]; nucleotide phosphorylation [GO:0046939]
MDBSrug1_01227.1	3.87928	4.02635	11.6019	11.8816	2.97048	0.00207939	1.45865e-05	citrate (Si)-synthase activity [GO:0004108]	mitochondrion [GO:0005739]	tricarboxylic acid cycle [GO:0006099]
MDBSrug1_09432.1	5.2435	4.71207	15.0368	14.6219	2.97911	0.00158554	6.17902e-06	cytochrome-c oxidase activity [GO:0004129]	integral component of membrane [GO:0016021]	hydrogen ion transmembrane transport [GO:1902600]
MDBSrug1_12076.1	0.351673	0.670233	1.52295	1.61443	3.07013	0.0757874	0.0220333	oxidoreductase activity [GO:0016491]; metal ion binding [GO:0046872]
MDBSrug1_07864.1;MDBSrug1_00283.1	1.02984	1.14542	2.97796	3.74036	3.08851	0.0995155	0.0362227	peroxidase activity [GO:0004601]		cellular oxidant detoxification [GO:0098869]
MDBSrug1_11386.1	1.0285	1.49169	3.6207	4.27934	3.13471	0.0283832	0.00369446
MDBSrug1_04969.1	6.62614	5.0366	16.2603	20.7679	3.17491	0.0835789	0.0263179
MDBSrug1_01182.1	1.82569	3.1111	6.65976	9.19238	3.21102	0.0965658	0.0340953	hydrolase activity, acting on acid anhydrides, catalyzing transmembrane movement of substances [GO:0016820]	vacuolar proton-transporting V-type ATPase, V1 domain [GO:0000221]; nucleus [GO:0005634]; cytosol [GO:0005829]	proton transport [GO:0015992]; transmembrane transport [GO:0055085]
MDBSrug1_00219.1	6.59283	6.23506	22.2902	19.4989	3.25767	0.0574917	0.0128158	oxidoreductase activity [GO:0016491]		oxidation-reduction process [GO:0055114]
MDBSrug1_11018.1	20.2821	15.634	61.083	56.0146	3.2603	0.00729453	0.000238792	transferase activity [GO:0016740]
MDBSrug1_07707.1	0.479939	0.8321	2.16881	2.11806	3.26733	0.0699562	0.0188658
MDBSrug1_11827.1	0.111686	0.185344	0.548101	0.427651	3.28503	0.0580502	0.0131665	oxidoreductase activity [GO:0016491]
MDBSrug1_00241.1	9.99929	6.97553	24.0278	31.7462	3.28569	0.0908635	0.0305947	structural constituent of ribosome [GO:0003735]	cytosol [GO:0005829]; ribosome [GO:0005840]	translation [GO:0006412]
MDBSrug1_11453.1	0.596442	1.21138	3.16403	2.8534	3.32855	0.0503142	0.0102354	oxidoreductase activity [GO:0016491]; metal ion binding [GO:0046872]		oxidation-reduction process [GO:0055114]
MDBSrug1_01744.1	1.01074	0.821059	3.35777	2.80827	3.36611	0.0561733	0.0122592	glutamate decarboxylase activity [GO:0004351]; pyridoxal phosphate binding [GO:0030170]		glutamate metabolic process [GO:0006536]
MDBSrug1_08159.1	3.68966	2.8572	11.2657	10.8879	3.38385	0.0137135	0.000823023	hydroxymethylbilane synthase activity [GO:0004418]		heme biosynthetic process [GO:0006783]; peptidyl-pyrromethane cofactor linkage [GO:0018160]
MDBSrug1_04102.1	0.287457	0.204935	0.802789	0.86491	3.38694	0.00988042	0.000454361		medial cortex [GO:0031097]; cell cortex of cell tip [GO:0051285]	actin filament organization [GO:0007015]; small GTPase mediated signal transduction [GO:0007264]; positive regulation of GTPase activity [GO:0043547]; mitotic actomyosin contractile ring assembly [GO:1903475]
MDBSrug1_06630.1	5.91373	4.14126	18.9773	15.2386	3.40288	0.0575559	0.0129198
MDBSrug1_10737.1	15.8496	17.4929	51.6071	62.8096	3.43156	0.0818414	0.0255794	FMN binding [GO:0010181]; oxidoreductase activity [GO:0016491]		negative regulation of transcription, DNA-templated [GO:0045892]; oxidation-reduction process [GO:0055114]
MDBSrug1_01677.1	43.3366	41.4308	164.33	126.925	3.43593	0.113325	0.0448708	sedoheptulose-7-phosphate:D-glyceraldehyde-3-phosphate glyceronetransferase activity [GO:0004801]	nucleus [GO:0005634]; cytosol [GO:0005829]	carbohydrate metabolic process [GO:0005975]; pentose-phosphate shunt [GO:0006098]
MDBSrug1_03213.1	9.28156	10.9966	34.3736	35.6992	3.45558	0.00254831	2.58207e-05	structural constituent of ribosome [GO:0003735]	cytosolic large ribosomal subunit [GO:0022625]	translation [GO:0006412]
MDBSrug1_05922.1	5.06415	4.95669	17.1968	17.5329	3.46575	0.00405446	7.26832e-05	methionine adenosyltransferase activity [GO:0004478]; ATP binding [GO:0005524]; metal ion binding [GO:0046872]	nucleus [GO:0005634]; cytosol [GO:0005829]	methionine metabolic process [GO:0006555]; S-adenosylmethionine biosynthetic process [GO:0006556]; one-carbon metabolic process [GO:0006730]
MDBSrug1_05122.1	0.498618	0.647695	1.7158	2.29398	3.49798	0.109246	0.0427446	actin binding [GO:0003779]		cell morphogenesis [GO:0000902]; actin filament organization [GO:0007015]
MDBSrug1_04934.1	0.57553	0.464024	1.80922	1.85246	3.52236	0.0127155	0.000713577	NAD(P)+ transhydrogenase (AB-specific) activity [GO:0008750]; NADP binding [GO:0050661]	integral component of membrane [GO:0016021]	proton transport [GO:0015992]; oxidation-reduction process [GO:0055114]
MDBSrug1_00366.1	0.861062	1.06255	3.54588	3.35646	3.58822	0.00312379	3.89561e-05	thiol-dependent ubiquitin-specific protease activity [GO:0004843]	cytoplasm [GO:0005737]	protein deubiquitination [GO:0016579]
MDBSrug1_10724.1	78.1775	77.9226	298.983	264.452	3.60944	0.053828	0.0114956	catalase activity [GO:0004096]; heme binding [GO:0020037]; metal ion binding [GO:0046872]		response to oxidative stress [GO:0006979]; hydrogen peroxide catabolic process [GO:0042744]; oxidation-reduction process [GO:0055114]; cellular oxidant detoxification [GO:0098869]
MDBSrug1_03638.1	0.781243	1.08845	3.3051	3.60442	3.69554	0.00718267	0.000229532	homocitrate synthase activity [GO:0004410]	cytosol [GO:0005829]	lysine biosynthetic process via aminoadipic acid [GO:0019878]
MDBSrug1_10534.2	1.28582	0.850199	4.26083	3.69224	3.72332	0.0179006	0.00142312		cytoplasm [GO:0005737]
MDBSrug1_12417.1	0.0474374	0.0168139	0.140445	0.0994486	3.73367	0.0839854	0.0266423	ATP binding [GO:0005524]; ATPase activity, coupled to transmembrane movement of substances [GO:0042626]	integral component of membrane [GO:0016021]	transmembrane transport [GO:0055085]
MDBSrug1_04865.1	8.93244	6.5202	32.9571	25.1603	3.761	0.0917527	0.0310371			regulation of transcription, DNA-templated [GO:0006355]
MDBSrug1_02944.1	0.297788	0.231292	1.05629	0.950699	3.79336	0.0127556	0.000725767	acetolactate synthase activity [GO:0003984]; amino acid binding [GO:0016597]; enzyme regulator activity [GO:0030234]	acetolactate synthase complex [GO:0005948]; mitochondrial nucleoid [GO:0042645]	branched-chain amino acid biosynthetic process [GO:0009082]; regulation of catalytic activity [GO:0050790]
MDBSrug1_03106.1	1.20993	0.544644	3.40615	3.29199	3.81753	0.0777464	0.0231482		fungal-type vacuole [GO:0000324]; integral component of membrane [GO:0016021]
MDBSrug1_07614.1;MDBSrug1_07872.1	29.6824	35.6648	138.969	114.92	3.88523	0.066566	0.016862	transferase activity [GO:0016740]
MDBSrug1_10912.1	0.642553	0.590097	2.11817	2.70136	3.90989	0.10033	0.0368321	catalytic activity [GO:0003824]		metabolic process [GO:0008152]
MDBSrug1_12722.1	0.432339	0.238321	1.10848	1.57539	4.00184	0.106934	0.0415068	hydrolase activity, acting on carbon-nitrogen (but not peptide) bonds [GO:0016810]	integral component of membrane [GO:0016021]
MDBSrug1_02273.1	0.547175	0.726124	2.44339	2.68336	4.02635	0.00800311	0.000305653	S-adenosylmethionine-dependent methyltransferase activity [GO:0008757]		methylation [GO:0032259]
MDBSrug1_04768.1;MDBSrug1_10693.1	170.284	153.961	685.394	643.016	4.09693	0.0127061	0.000703146	peptidyl-prolyl cis-trans isomerase activity [GO:0003755]		protein peptidyl-prolyl isomerization [GO:0000413]; protein folding [GO:0006457]
MDBSrug1_05731.1	0.366237	0.403489	1.4009	1.75479	4.09976	0.0907328	0.0304093
MDBSrug1_09531.1	1.06819	0.777177	3.5842	4.03288	4.12767	0.014108	0.000879691	cytochrome-b5 reductase activity, acting on NAD(P)H [GO:0004128]	membrane [GO:0016020]	oxidation-reduction process [GO:0055114]
MDBSrug1_04748.2	0.848905	0.622368	3.35629	2.72816	4.1355	0.05959	0.0138409
MDBSrug1_06784.1	0.322297	0.469886	1.69231	1.63912	4.20538	0.0206666	0.00198129	thiol-dependent ubiquitin-specific protease activity [GO:0004843]	nucleoplasm [GO:0005654]; proteasome regulatory particle [GO:0005838]	ubiquitin-dependent protein catabolic process [GO:0006511]; protein deubiquitination [GO:0016579]; negative regulation of proteasomal protein catabolic process [GO:1901799]
MDBSrug1_01502.1	0.521372	0.346374	1.89962	1.80474	4.26894	0.0127635	0.000736164	magnesium ion binding [GO:0000287]; DNA replication origin binding [GO:0003688]; adenylosuccinate synthase activity [GO:0004019]; GTP binding [GO:0005525]; sulfinylpropanyl adenylate synthase [GO:0061483]	nucleus [GO:0005634]; cytosol [GO:0005829]	fumarate metabolic process [GO:0006106]; 'de novo' AMP biosynthetic process [GO:0044208]; cellular response to cadmium ion [GO:0071276]
MDBSrug1_07593.1	0.536152	0.39333	1.71772	2.25457	4.27366	0.0932326	0.0319011		intracellular [GO:0005622]; membrane [GO:0016020]	intracellular protein transport [GO:0006886]; vesicle-mediated transport [GO:0016192]
MDBSrug1_10188.1	254.643	207.547	881.903	1095.07	4.27741	0.0770112	0.0226892
MDBSrug1_04944.1	2.2419	3.07137	12.5125	10.8169	4.39078	0.0276226	0.00346628	nucleotide binding [GO:0000166]; nucleic acid binding [GO:0003676]
MDBSrug1_03043.1	1.07393	0.598406	3.29363	4.19055	4.47528	0.0522907	0.0109228	phosphatase activity [GO:0016791]		dephosphorylation [GO:0016311]
MDBSrug1_00480.1	0.151673	0.256608	0.928209	0.918711	4.52365	0.0447331	0.0084027	nucleotide binding [GO:0000166]; protein kinase activity [GO:0004672]	intracellular part [GO:0044424]	protein phosphorylation [GO:0006468]; cell cycle process [GO:0022402]; DNA integrity checkpoint [GO:0031570]
MDBSrug1_03134.1	2.9574	2.53062	11.0489	14.1747	4.59614	0.094906	0.0329915	FMN binding [GO:0010181]; oxidoreductase activity [GO:0016491]		negative regulation of transcription, DNA-templated [GO:0045892]; oxidation-reduction process [GO:0055114]
MDBSrug1_06372.1	0.136808	0.121736	0.561046	0.627975	4.59891	0.0368086	0.00599611	magnesium ion binding [GO:0000287]; ATP phosphoribosyltransferase activity [GO:0003879]	cytosol [GO:0005829]	histidine biosynthetic process [GO:0000105]
MDBSrug1_08426.1	1.26458	2.81753	9.17188	9.84958	4.65971	0.0359763	0.00574836	zinc ion binding [GO:0008270]; oxidoreductase activity [GO:0016491]		oxidation-reduction process [GO:0055114]
MDBSrug1_02913.1	7.51932	7.79681	37.3192	34.8019	4.70884	0.0264268	0.00313084	threonine-type endopeptidase activity [GO:0004298]; peroxiredoxin activity [GO:0051920]	nucleus [GO:0005634]; proteasome core complex [GO:0005839]; proteasome storage granule [GO:0034515]	proteasomal ubiquitin-independent protein catabolic process [GO:0010499]; proteasome-mediated ubiquitin-dependent protein catabolic process [GO:0043161]; oxidation-reduction process [GO:0055114]; cellular oxidant detoxification [GO:0098869]
MDBSrug1_00509.1	1.01191	1.07205	5.05492	5.20211	4.92189	0.00378564	5.90123e-05	ferric iron binding [GO:0008199]; oxidoreductase activity, acting on single donors with incorporation of molecular oxygen, incorporation of two atoms of oxygen [GO:0016702]		cellular aromatic compound metabolic process [GO:0006725]; oxidation-reduction process [GO:0055114]
MDBSrug1_12316.1	4.85539	1.36238	17.9854	12.8121	4.95313	0.0724661	0.020051
MDBSrug1_05372.1	27.9865	25.3648	136.506	128.056	4.95886	0.0152673	0.000987674	DNA binding [GO:0003677]
MDBSrug1_10220.1	1.40802	0.873876	5.24873	6.3357	5.07666	0.0374857	0.00616483
MDBSrug1_08685.1	0.236847	0.314508	1.2288	1.58459	5.10269	0.0871022	0.0281741
MDBSrug1_06770.1	1.80673	2.24724	9.26804	11.6428	5.15812	0.0803739	0.0249328		integral component of membrane [GO:0016021]; cell division site [GO:0032153]; cortical endoplasmic reticulum [GO:0032541]	vesicle-mediated transport [GO:0016192]; cellular protein localization [GO:0034613]; endoplasmic reticulum inheritance [GO:0048309]; nuclear pore complex assembly [GO:0051292]; endoplasmic reticulum tubular network organization [GO:0071786]
MDBSrug1_01359.1	0.326186	0.0635743	1.06499	1.01954	5.34823	0.0899374	0.0300025	oxidoreductase activity [GO:0016491]; FAD binding [GO:0071949]		oxidation-reduction process [GO:0055114]
MDBSrug1_09657.1	0.696463	0.357063	2.87299	2.79108	5.3763	0.0366117	0.0059355
MDBSrug1_12582.2	2.53342	2.65327	14.472	13.7482	5.44089	0.0169766	0.00124381	hydrolase activity [GO:0016787]
MDBSrug1_05543.1	0.878855	0.864257	4.87184	4.73464	5.51111	0.0102387	0.000478817	beta-glucosidase activity [GO:0008422]; scopolin beta-glucosidase activity [GO:0102483]		cellulose catabolic process [GO:0030245]
MDBSrug1_02824.1	9.97838	10.6084	54.9876	58.4877	5.51204	0.019998	0.00182367	zinc ion binding [GO:0008270]; mannitol-1-phosphate 5-dehydrogenase activity [GO:0008926]		oxidation-reduction process [GO:0055114]
MDBSrug1_08277.1	46.4947	39.4178	227.292	246.592	5.5159	0.016671	0.00120842	superoxide dismutase activity [GO:0004784]; metal ion binding [GO:0046872]		removal of superoxide radicals [GO:0019430]; oxidation-reduction process [GO:0055114]
MDBSrug1_01539.1	0.237219	0.355691	1.75733	1.52743	5.54006	0.0224604	0.00236333	hydrolase activity [GO:0016787]	nucleus [GO:0005634]; cytosol [GO:0005829]; membrane [GO:0016020]
MDBSrug1_00880.1	0.583576	0.64576	2.98221	3.83158	5.54266	0.0946039	0.032739	metallocarboxypeptidase activity [GO:0004181]	integral component of membrane [GO:0016021]	proteolysis [GO:0006508]
MDBSrug1_07021.1	0.111781	0.120273	0.736435	0.560146	5.5874	0.103813	0.0393243
MDBSrug1_00045.1	1.2189	1.01292	6.53882	6.19299	5.70468	0.00394234	6.76005e-05	acid phosphatase activity [GO:0003993]		dephosphorylation [GO:0016311]
MDBSrug1_08662.1	1.29521	2.05208	9.46074	10.5048	5.96468	0.00840417	0.000340621
MDBSrug1_07263.1	1.07868	2.84878	10.8137	12.8506	6.02534	0.0191634	0.00159819	oxidoreductase activity [GO:0016491]		oxidation-reduction process [GO:0055114]
MDBSrug1_09619.1	0.152151	0.0344678	0.620557	0.510562	6.0611	0.0281721	0.00362306	magnesium ion binding [GO:0000287]; acetolactate synthase activity [GO:0003984]; thiamine pyrophosphate binding [GO:0030976]; flavin adenine dinucleotide binding [GO:0050660]		isoleucine biosynthetic process [GO:0009097]; valine biosynthetic process [GO:0009099]
MDBSrug1_05589.1	1.30768	2.37297	12.7814	9.80134	6.13552	0.07173	0.0196796
MDBSrug1_00843.1	0.13483	0.0643028	0.585494	0.686317	6.38674	0.0179429	0.00144046	hydrolase activity, acting on carbon-nitrogen (but not peptide) bonds [GO:0016810]	integral component of membrane [GO:0016021]
MDBSrug1_10916.1	5.36932	7.26238	46.3772	36.8169	6.58614	0.0760384	0.0221655	threonine-type endopeptidase activity [GO:0004298]; peroxiredoxin activity [GO:0051920]	nucleus [GO:0005634]; proteasome core complex [GO:0005839]; proteasome storage granule [GO:0034515]	proteasomal ubiquitin-independent protein catabolic process [GO:0010499]; proteasome-mediated ubiquitin-dependent protein catabolic process [GO:0043161]; oxidation-reduction process [GO:0055114]; cellular oxidant detoxification [GO:0098869]
MDBSrug1_08605.1	7.20387	9.41093	59.4334	54.7132	6.87017	0.0114125	0.000595977	electron carrier activity [GO:0009055]; heme binding [GO:0020037]; metal ion binding [GO:0046872]	mitochondrion [GO:0005739]; respiratory chain [GO:0070469]	mitochondrial ATP synthesis coupled electron transport [GO:0042775]
MDBSrug1_00276.1	0.10795	0.428566	2.15937	1.54117	6.89737	0.0748555	0.0214123	homoserine dehydrogenase activity [GO:0004412]; kinase activity [GO:0016301]; NADP binding [GO:0050661]		methionine biosynthetic process [GO:0009086]; threonine biosynthetic process [GO:0009088]; homoserine biosynthetic process [GO:0009090]; isoleucine biosynthetic process [GO:0009097]; phosphorylation [GO:0016310]; oxidation-reduction process [GO:0055114]
MDBSrug1_00920.1	0.759765	1.09983	5.79169	7.32901	7.05568	0.0744957	0.0210771	NADPH:quinone reductase activity [GO:0003960]; zinc ion binding [GO:0008270]; AU-rich element binding [GO:0017091]; 2-alkenal reductase [NAD(P)] activity [GO:0032440]	nucleus [GO:0005634]; cytosol [GO:0005829]	cellular response to oxidative stress [GO:0034599]; oxidation-reduction process [GO:0055114]
MDBSrug1_12004.1	1.61069	1.06665	8.62522	10.3495	7.08715	0.047863	0.00928908
MDBSrug1_00798.1	0.184869	0.0508628	0.744387	0.927752	7.09339	0.0297969	0.00406427		MICOS complex [GO:0061617]	mitochondrion organization [GO:0007005]; single-organism process [GO:0044699]
MDBSrug1_05719.1	1.38066	1.28253	9.31131	9.93919	7.22836	0.0210013	0.00204612	glutathione transferase activity [GO:0004364]	cytoplasm [GO:0005737]	metabolic process [GO:0008152]
MDBSrug1_06102.1	1.06511	1.09317	8.8316	7.24022	7.44659	0.0724211	0.0199821
MDBSrug1_06211.1	5.31757	8.11611	49.0735	51.0521	7.45333	0.00263058	2.87047e-05	ferrous iron binding [GO:0008198]; oxidoreductase activity [GO:0016491]; identical protein binding [GO:0042802]	nucleus [GO:0005634]; cytosol [GO:0005829]; integral component of membrane [GO:0016021]	mitochondrial genome maintenance [GO:0000002]; response to stress [GO:0006950]; thiamine biosynthetic process [GO:0009228]; thiazole biosynthetic process [GO:0052837]; oxidation-reduction process [GO:0055114]
MDBSrug1_06406.1	0.5196	0.422817	3.44827	4.08879	7.99758	0.056588	0.0124379	methyltransferase activity [GO:0008168]		metabolic process [GO:0008152]
MDBSrug1_05661.1	0.0467286	0.0417661	0.333147	0.403787	8.32744	0.0678771	0.0175644	microtubule motor activity [GO:0003777]; ATP binding [GO:0005524]; microtubule binding [GO:0008017]	microtubule [GO:0005874]	microtubule-based movement [GO:0007018]
MDBSrug1_01817.1	1.21043	0.99687	9.865	8.52585	8.33184	0.0474096	0.00916414	catalytic activity [GO:0003824]
MDBSrug1_06687.1	0.273226	0.602049	4.43503	3.27809	8.81222	0.0868901	0.0280378	oxidoreductase activity [GO:0016491]
MDBSrug1_08816.1	0.208669	0.115367	1.45471	1.40377	8.82148	0.00569094	0.000150812
MDBSrug1_06649.1	0.0448111	0.145265	1	0.680803	8.84281	0.109411	0.0428944	oxidoreductase activity [GO:0016491]		oxidation-reduction process [GO:0055114]
MDBSrug1_02686.1	9.84618	15.9909	126.804	106.033	9.01174	0.046757	0.00892865
MDBSrug1_02284.1	34.0703	34.7382	338.78	334.324	9.78228	0.00384549	6.29425e-05	formate dehydrogenase (NAD+) activity [GO:0008863]; oxidoreductase activity, acting on the CH-OH group of donors, NAD or NADP as acceptor [GO:0016616]; NAD binding [GO:0051287]	cytosol [GO:0005829]	formate catabolic process [GO:0042183]; oxidation-reduction process [GO:0055114]
MDBSrug1_08121.1	0.388176	0.203847	3.46285	2.42473	9.94484	0.114347	0.0454534	N-acetyltransferase activity [GO:0008080]
MDBSrug1_09352.1	0.229025	0.382316	3.02412	3.19615	10.1748	0.00179874	9.81384e-06	peptide-methionine (S)-S-oxide reductase activity [GO:0008113]		response to oxidative stress [GO:0006979]; protein repair [GO:0030091]; oxidation-reduction process [GO:0055114]
MDBSrug1_08494.1	0.803785	0.250581	6.1438	4.90533	10.4794	0.0446398	0.00835039
MDBSrug1_09175.1	3.53346	3.05145	35.5332	34.0665	10.5696	0.00746679	0.000256071
MDBSrug1_00608.1	0.401255	0.379567	4.72057	3.54863	10.5904	0.0987329	0.0354761	protein disulfide isomerase activity [GO:0003756]; protein disulfide oxidoreductase activity [GO:0015035]; protein-disulfide reductase (glutathione) activity [GO:0019153]	fungal-type vacuole [GO:0000324]	protein folding [GO:0006457]; cell redox homeostasis [GO:0045454]; oxidation-reduction process [GO:0055114]
MDBSrug1_05301.1	0.0141412	0.181645	1.12424	0.955727	10.6237	0.0155338	0.00105335	inositol-3-phosphate synthase activity [GO:0004512]	cytoplasm [GO:0005737]	inositol biosynthetic process [GO:0006021]; phospholipid biosynthetic process [GO:0008654]
MDBSrug1_12535.1	0.764868	3.33699	23.3413	22.6459	11.2113	0.0280409	0.00354063
MDBSrug1_12144.1	0.42206	0.267262	4.21385	3.60349	11.3406	0.0423284	0.00765407
MDBSrug1_05365.1	0.0227756	0.162846	1.02382	1.29524	12.4935	0.0403525	0.00698228	protein phosphatase inhibitor activity [GO:0004864]		regulation of signal transduction [GO:0009966]; negative regulation of catalytic activity [GO:0043086]; regulation of phosphoprotein phosphatase activity [GO:0043666]
MDBSrug1_09876.1	0.142883	0.0525919	1.01938	1.49317	12.8536	0.118171	0.0479867	adenine phosphoribosyltransferase activity [GO:0003999]	cytoplasm [GO:0005737]	adenine salvage [GO:0006168]; nucleoside metabolic process [GO:0009116]
MDBSrug1_07396.1	2.85114	2.49215	38.0294	31.3286	12.9804	0.0657064	0.0165418	homogentisate 1,2-dioxygenase activity [GO:0004411]		L-phenylalanine catabolic process [GO:0006559]; tyrosine metabolic process [GO:0006570]; oxidation-reduction process [GO:0055114]
MDBSrug1_00038.1	0.0608031	0.202294	1.39435	2.06909	13.1641	0.12001	0.0492011	D-aspartate oxidase activity [GO:0008445]; FAD binding [GO:0071949]		D-amino acid metabolic process [GO:0046416]; oxidation-reduction process [GO:0055114]
MDBSrug1_09776.1	0.110364	0.124599	1.62929	1.56323	13.5873	0.0104604	0.000513645		integral component of membrane [GO:0016021]
MDBSrug1_01599.1;MDBSrug1_04947.1;MDBSrug1_10025.1	0.219508	0.0919977	1.82579	2.51826	13.9454	0.0990667	0.0357505
MDBSrug1_01749.1	0.164744	0.131685	2.30895	2.45826	16.0821	0.0159944	0.00110951	iron ion binding [GO:0005506]; methyltransferase activity [GO:0008168]; sterol 14-demethylase activity [GO:0008398]; heme binding [GO:0020037]	endoplasmic reticulum [GO:0005783]; integral component of membrane [GO:0016021]	ergosterol biosynthetic process [GO:0006696]; methylation [GO:0032259]; oxidation-reduction process [GO:0055114]; demethylation [GO:0070988]
MDBSrug1_12508.1	0.405898	0.475054	6.34945	8.07703	16.376	0.0803375	0.0248589	translation initiation factor activity [GO:0003743]		translational initiation [GO:0006413]
MDBSrug1_04917.1	3.40069	8.42402	114.576	81.4312	16.5761	0.106896	0.0414085	antioxidant activity [GO:0016209]; oxidoreductase activity [GO:0016491]		oxidation-reduction process [GO:0055114]; cellular oxidant detoxification [GO:0098869]
MDBSrug1_11177.1	0.366343	0.290626	7.48641	5.46321	19.7111	0.103446	0.0387016
MDBSrug1_10258.2	0.530304	0.305356	9.35681	7.6116	20.3054	0.0646756	0.0158791
MDBSrug1_01155.1	6.85404	7.42288	142.065	151.117	20.5353	0.0201748	0.00190269	mannitol 2-dehydrogenase (NADP+) activity [GO:0050085]		oxidation-reduction process [GO:0055114]
MDBSrug1_01042.1	0.112416	0.168019	3.14184	3.66073	24.2572	0.0481827	0.00942624	3-isopropylmalate dehydratase activity [GO:0003861]; 4 iron, 4 sulfur cluster binding [GO:0051539]	3-isopropylmalate dehydratase complex [GO:0009316]	leucine biosynthetic process [GO:0009098]
MDBSrug1_07193.1;MDBSrug1_04219.1	0.292798	0.662151	10.9191	13.2986	25.3602	0.0594429	0.013714
MDBSrug1_10639.1	0.447898	0.294536	8.70437	10.7091	26.1484	0.0666802	0.0169429	hydrolase activity [GO:0016787]	cytosol [GO:0005829]
MDBSrug1_07551.1	0.0678989	0.0231924	1.37878	1.10322	27.2474	0.066791	0.0170231	metalloendopeptidase activity [GO:0004222]; metal ion binding [GO:0046872]		proteolysis [GO:0006508]
MDBSrug1_08554.1	0.380201	0.673136	13.6901	15.2094	27.4362	0.0289719	0.00383883	transferase activity [GO:0016740]
MDBSrug1_10991.1	0.0847771	0.0720603	2.60336	2.11717	30.0982	0.0674001	0.0173885	carbon-nitrogen ligase activity, with glutamine as amido-N-donor [GO:0016884]
MDBSrug1_03363.1	0.135273	0.106705	3.71306	4.11149	32.3358	0.0325729	0.00477296
MDBSrug1_07756.1	0.131105	0.093597	3.7985	4.30002	36.0411	0.0394625	0.00670524
MDBSrug1_04152.1	0.0777912	0.191429	5.23912	4.72045	36.9942	0.026953	0.00329823
MDBSrug1_09087.1	1.61438	1.81964	77.7009	74.5023	44.3223	0.0133084	0.000788338	alpha-ketoglutarate-dependent xanthine dioxygenase activity [GO:0097641]	nucleus [GO:0005634]; cytosol [GO:0005829]	xanthine oxidation [GO:0006151]
MDBSrug1_06622.1	0.602254	0.873876	39.6013	29.0116	46.4816	0.0994094	0.0361066	zinc ion binding [GO:0008270]; oxidoreductase activity [GO:0016491]		oxidation-reduction process [GO:0055114]
MDBSrug1_00476.1	0.081215	0.0796699	5.6038	5.97851	71.9913	0.0208764	0.00201767
MDBSrug1_07226.1	0.446197	0.224912	52.8572	55.8849	162.033	0.0172447	0.00127689	antioxidant activity [GO:0016209]; oxidoreductase activity [GO:0016491]		oxidation-reduction process [GO:0055114]; cellular oxidant detoxification [GO:0098869]
MDBSrug1_01446.1	NaN	NaN	1155.68	1390.03
MDBSrug1_08947.1	NaN	NaN	901.949	767.038
MDBSrug1_09613.1;MDBSrug1_12441.1	NaN	NaN	130.247	128.599
MDBSrug1_00575.1	NaN	NaN	94.2338	87.6424
MDBSrug1_11356.1	NaN	NaN	65.329	57.385
MDBSrug1_08580.1	NaN	NaN	61.4195	48.1208
MDBSrug1_10549.1;MDBSrug1_05174.1;MDBSrug1_08068.1	NaN	NaN	59.3187	59.1932
MDBSrug1_11686.1;MDBSrug1_09123.1	NaN	NaN	46.0591	80.746
MDBSrug1_06348.1	NaN	NaN	38.7506	31.9809				binding [GO:0005488]; oxidoreductase activity [GO:0016491]		response to stimulus [GO:0050896]
MDBSrug1_00499.1	NaN	NaN	37.7705	79.2743
MDBSrug1_06488.1	NaN	NaN	33.2585	38.1678
MDBSrug1_03936.1;MDBSrug1_02760.1	NaN	NaN	27.793	30.5648
MDBSrug1_06726.1	NaN	NaN	24.5482	35.0744
MDBSrug1_07405.1	NaN	NaN	21.9573	9.22238
MDBSrug1_00626.1;MDBSrug1_10415.1	NaN	NaN	21.7709	20.7967
MDBSrug1_10341.1;MDBSrug1_04572.1	NaN	NaN	19.2022	15.2037
MDBSrug1_00672.1;MDBSrug1_12750.1;MDBSrug1_01411.1	NaN	NaN	17.411	19.2431
MDBSrug1_03053.1	NaN	NaN	16.6624	13.5025
MDBSrug1_00199.1	NaN	NaN	16.0158	7.60105				serine-type peptidase activity [GO:0008236]
MDBSrug1_08545.1	NaN	NaN	13.3902	13.7198				aspartic-type endopeptidase activity [GO:0004190]		proteolysis [GO:0006508]
MDBSrug1_07362.1	NaN	NaN	12.9571	10.5923						defense response to bacterium [GO:0042742]; defense response to fungus [GO:0050832]
MDBSrug1_08166.1	NaN	NaN	11.3145	10.5676				cysteine-type peptidase activity [GO:0008234]
MDBSrug1_04838.1	NaN	NaN	9.85279	7.8804					integral component of membrane [GO:0016021]
MDBSrug1_04465.1;MDBSrug1_04424.1	NaN	NaN	9.84651	10.8015
MDBSrug1_11334.1	NaN	NaN	9.77069	7.33914				aspartic-type endopeptidase activity [GO:0004190]		proteolysis [GO:0006508]
MDBSrug1_03102.1	NaN	NaN	9.57392	11.1859
MDBSrug1_02084.1	NaN	NaN	9.54285	11.1453				structural constituent of ribosome [GO:0003735]; metal ion binding [GO:0046872]	ribosome [GO:0005840]	translation [GO:0006412]
MDBSrug1_01499.1	NaN	NaN	9.50475	11.0436
MDBSrug1_04922.1	NaN	NaN	9.46185	7.28441				peroxidase activity [GO:0004601]; heme binding [GO:0020037]; metal ion binding [GO:0046872]		response to oxidative stress [GO:0006979]; oxidation-reduction process [GO:0055114]; cellular oxidant detoxification [GO:0098869]
MDBSrug1_06974.1	NaN	NaN	9.29578	7.40239
MDBSrug1_02093.1	NaN	NaN	9.0857	11.7677
MDBSrug1_10575.1	NaN	NaN	8.51167	9.81877
MDBSrug1_04978.1	NaN	NaN	8.49133	8.92925
MDBSrug1_05125.1	NaN	NaN	8.39479	11.7997
MDBSrug1_02203.1	NaN	NaN	8.02234	6.97993
MDBSrug1_00503.1	NaN	NaN	7.8363	7.59659
MDBSrug1_05525.1	NaN	NaN	7.65765	7.56132
MDBSrug1_07231.1	NaN	NaN	7.26893	9.32739					integral component of membrane [GO:0016021]
MDBSrug1_04119.1;MDBSrug1_00296.1	NaN	NaN	6.53586	6.15406
MDBSrug1_05380.1	NaN	NaN	5.59862	3.83053					MICOS complex [GO:0061617]
MDBSrug1_02432.1	NaN	NaN	5.50542	4.83276				DNA binding [GO:0003677]; DNA-directed DNA polymerase activity [GO:0003887]	cytosol [GO:0005829]	DNA replication [GO:0006260]; DNA biosynthetic process [GO:0071897]
MDBSrug1_06343.1	NaN	NaN	5.50505	6.00162
MDBSrug1_12061.1	NaN	NaN	5.38336	7.12589
MDBSrug1_07307.1	NaN	NaN	5.02645	7.84512				thiol oxidase activity [GO:0016972]		oxidation-reduction process [GO:0055114]
MDBSrug1_02868.1	NaN	NaN	4.78714	5.06548
MDBSrug1_05502.1	NaN	NaN	4.6895	10.9479				aspartic-type endopeptidase activity [GO:0004190]		proteolysis [GO:0006508]
MDBSrug1_02071.1	NaN	NaN	4.58372	4.71518
MDBSrug1_07698.1	NaN	NaN	4.50235	5.78147
MDBSrug1_00919.2	NaN	NaN	4.32075	5.62457				hydrolase activity [GO:0016787]
MDBSrug1_04138.1	NaN	NaN	4.26564	5.31482
MDBSrug1_04675.1	NaN	NaN	4.08551	1.28453				ATP binding [GO:0005524]
MDBSrug1_03569.1	NaN	NaN	3.96716	7.04521
MDBSrug1_10538.1	NaN	NaN	3.67966	4.42854
MDBSrug1_11447.1	NaN	NaN	3.48189	3.86086				hydrogen ion transmembrane transporter activity [GO:0015078]	vacuolar membrane [GO:0005774]; endoplasmic reticulum [GO:0005783]; integral component of membrane [GO:0016021]; proton-transporting V-type ATPase, V0 domain [GO:0033179]	protein targeting to vacuole [GO:0006623]; cellular copper ion homeostasis [GO:0006878]; cellular iron ion homeostasis [GO:0006879]; endocytosis [GO:0006897]; vacuole organization [GO:0007033]; ATP hydrolysis coupled proton transport [GO:0015991]
MDBSrug1_11896.1	NaN	NaN	3.24796	2.85672					intracellular organelle [GO:0043229]
MDBSrug1_12647.1	NaN	NaN	3.22573	2.15256				hydrogen ion transmembrane transporter activity [GO:0015078]	proton-transporting ATP synthase complex, coupling factor F(o) [GO:0045263]	ATP synthesis coupled proton transport [GO:0015986]
MDBSrug1_02846.1	NaN	NaN	3.15775	2.40523				oxidoreductase activity [GO:0016491]
MDBSrug1_05167.1	NaN	NaN	3.03469	3.83572				copper ion binding [GO:0005507]; hydroquinone:oxygen oxidoreductase activity [GO:0052716]		oxidation-reduction process [GO:0055114]
MDBSrug1_02402.1	NaN	NaN	3.00166	3.87991
MDBSrug1_04016.1;MDBSrug1_06057.2	NaN	NaN	2.89744	0.926617				serine-type carboxypeptidase activity [GO:0004185]		proteolysis [GO:0006508]
MDBSrug1_00848.1	NaN	NaN	2.89596	3.45948
MDBSrug1_05027.1	NaN	NaN	2.8302	3.21751				transferase activity [GO:0016740]; hydrolase activity [GO:0016787]		acetyl-CoA metabolic process [GO:0006084]
MDBSrug1_12107.1	NaN	NaN	2.80841	0.0672329
MDBSrug1_07460.1	NaN	NaN	2.77838	2.03166
MDBSrug1_07906.1	NaN	NaN	2.76177	1.32362
MDBSrug1_03848.1	NaN	NaN	2.68758	2.13537					membrane [GO:0016020]
MDBSrug1_01699.1	NaN	NaN	2.61438	4.39489
MDBSrug1_08093.1	NaN	NaN	2.59851	3.41265				cytochrome-c oxidase activity [GO:0004129]	mitochondrial respiratory chain [GO:0005746]; integral component of membrane [GO:0016021]	respiratory electron transport chain [GO:0022904]; hydrogen ion transmembrane transport [GO:1902600]
MDBSrug1_00614.1	NaN	NaN	2.56863	3.4328
MDBSrug1_10831.1	NaN	NaN	2.55014	2.31458
MDBSrug1_11255.1	NaN	NaN	2.51992	3.09357
MDBSrug1_12325.1	NaN	NaN	2.49007	0.731806				NADH dehydrogenase (ubiquinone) activity [GO:0008137]	mitochondrion [GO:0005739]	oxidation-reduction process [GO:0055114]
MDBSrug1_11458.1	NaN	NaN	2.35747	3.93047
MDBSrug1_01863.1	NaN	NaN	2.3314	1.6332
MDBSrug1_01330.1	NaN	NaN	2.21659	4.83033
MDBSrug1_12604.1	NaN	NaN	2.12139	0.711656
MDBSrug1_09001.1	NaN	NaN	2.09842	3.73541				ATP binding [GO:0005524]
MDBSrug1_00719.1	NaN	NaN	2.07046	2.61026
MDBSrug1_06179.1	NaN	NaN	2.05999	1.56655
MDBSrug1_03709.1	NaN	NaN	2.03037	2.15982
MDBSrug1_04254.1	NaN	NaN	1.98509	2.08802				hydrolase activity [GO:0016787]
MDBSrug1_11327.1	NaN	NaN	1.93117	1.20118
MDBSrug1_10335.1	NaN	NaN	1.85283	1.66787
MDBSrug1_11547.1	NaN	NaN	1.81437	2.15642				adenylylsulfate kinase activity [GO:0004020]; sulfate adenylyltransferase (ATP) activity [GO:0004781]; ATP binding [GO:0005524]	cytoplasm [GO:0005737]	sulfur amino acid metabolic process [GO:0000096]; sulfate assimilation [GO:0000103]; phosphorylation [GO:0016310]
MDBSrug1_06666.1	NaN	NaN	1.80682	2.85708
MDBSrug1_00487.1	NaN	NaN	1.76728	1.53391				iron ion binding [GO:0005506]; poly(A) binding [GO:0008143]; L-ascorbic acid binding [GO:0031418]; peptidyl-proline dioxygenase activity [GO:0031543]	cytosol [GO:0005829]	nuclear-transcribed mRNA catabolic process, deadenylation-dependent decay [GO:0000288]; regulation of translational termination [GO:0006449]; negative regulation of transcription by transcription factor catabolism [GO:0010620]; peptidyl-proline di-hydroxylation [GO:0018188]; negative regulation of sequence-specific DNA binding transcription factor activity [GO:0043433]; oxidation-reduction proces…
MDBSrug1_03874.1	NaN	NaN	1.69908	1.96529				catalytic activity [GO:0003824]; binding [GO:0005488]
MDBSrug1_06210.1	NaN	NaN	1.67922	1.21431
MDBSrug1_00049.1	NaN	NaN	1.67215	1.28157				oxidoreductase activity [GO:0016491]; metal ion binding [GO:0046872]
MDBSrug1_08395.1	NaN	NaN	1.66664	1.84152				glyoxalase III activity [GO:0019172]	nucleus [GO:0005634]; cytosol [GO:0005829]	lactate biosynthetic process [GO:0019249]; methylglyoxal catabolic process to lactate [GO:0061727]
MDBSrug1_05944.1;MDBSrug1_07596.1;MDBSrug1_11380.1;MDBSrug1_02784.1	NaN	NaN	1.66109	3.04083
MDBSrug1_01136.1	NaN	NaN	1.65843	1.38617
MDBSrug1_10835.1	NaN	NaN	1.62185	0.643949
MDBSrug1_01714.1	NaN	NaN	1.61113	3.24614
MDBSrug1_10379.1	NaN	NaN	1.59541	1.28518				hydroxyethylthiazole kinase activity [GO:0004417]; thiamine-phosphate diphosphorylase activity [GO:0004789]		thiamine biosynthetic process [GO:0009228]; phosphorylation [GO:0016310]
MDBSrug1_00598.1	NaN	NaN	1.5579	0.2373					integral component of membrane [GO:0016021]
MDBSrug1_04060.1	NaN	NaN	1.5559	1.0047				DNA ligase activity [GO:0003909]; zinc ion binding [GO:0008270]; enoyl-[acyl-carrier-protein] reductase activity [GO:0016631]; organic cyclic compound binding [GO:0097159]; heterocyclic compound binding [GO:1901363]	mitochondrion [GO:0005739]	DNA repair [GO:0006281]; fatty acid biosynthetic process [GO:0006633]; aerobic respiration [GO:0009060]
MDBSrug1_07294.1	NaN	NaN	1.54015	1.14843
MDBSrug1_03078.1	NaN	NaN	1.52088	1.47468
MDBSrug1_06926.1	NaN	NaN	1.52043	1.33829				carbon-nitrogen ligase activity, with glutamine as amido-N-donor [GO:0016884]
MDBSrug1_06867.1	NaN	NaN	1.49628	1.15516
MDBSrug1_06616.1	NaN	NaN	1.48386	1.46568				binding [GO:0005488]; oxidoreductase activity [GO:0016491]		response to stimulus [GO:0050896]
MDBSrug1_05461.1	NaN	NaN	1.45641	1.69232				binding [GO:0005488]; oxidoreductase activity [GO:0016491]		metabolic process [GO:0008152]
MDBSrug1_04023.1	NaN	NaN	1.43063	2.03843				catalytic activity [GO:0003824]
MDBSrug1_11609.1	NaN	NaN	1.42686	2.13732				cytochrome-c oxidase activity [GO:0004129]	mitochondrial intermembrane space [GO:0005758]	cellular copper ion homeostasis [GO:0006878]; mitochondrial respiratory chain complex IV assembly [GO:0033617]; hydrogen ion transmembrane transport [GO:1902600]
MDBSrug1_07291.1	NaN	NaN	1.41084	1.69041
MDBSrug1_05163.1	NaN	NaN	1.40641	1.08145				hydrolase activity, acting on glycosyl bonds [GO:0016798]		metabolic process [GO:0008152]
MDBSrug1_11707.1	NaN	NaN	1.39601	2.80738				cytochrome-c oxidase activity [GO:0004129]	mitochondrial respiratory chain complex IV [GO:0005751]	hydrogen ion transmembrane transport [GO:1902600]
MDBSrug1_10267.2	NaN	NaN	1.33828	1.37324				calcium-dependent cysteine-type endopeptidase activity [GO:0004198]	intracellular [GO:0005622]	proteolysis [GO:0006508]
MDBSrug1_03110.1	NaN	NaN	1.32829	1.27034				oxidoreductase activity [GO:0016491]	mitochondrion [GO:0005739]	oxidation-reduction process [GO:0055114]
MDBSrug1_07131.1	NaN	NaN	1.27755	1.02347				monophenol monooxygenase activity [GO:0004503]; copper ion binding [GO:0005507]		melanin biosynthetic process [GO:0042438]; oxidation-reduction process [GO:0055114]
MDBSrug1_06463.1	NaN	NaN	1.26316	1.13655				copper ion transmembrane transporter activity [GO:0005375]	integral component of membrane [GO:0016021]	copper ion transmembrane transport [GO:0035434]
MDBSrug1_09164.1	NaN	NaN	1.19984	1.72678
MDBSrug1_06693.1	NaN	NaN	1.18031	0.600932				hydrolase activity [GO:0016787]		metabolic process [GO:0008152]
MDBSrug1_02822.1	NaN	NaN	1.14806	1.51916				hydrolase activity, hydrolyzing O-glycosyl compounds [GO:0004553]	membrane [GO:0016020]	carbohydrate metabolic process [GO:0005975]
MDBSrug1_00797.1;MDBSrug1_02565.1	NaN	NaN	1.13485	1.18192
MDBSrug1_10714.1	NaN	NaN	1.13337	0.564727
MDBSrug1_11701.1	NaN	NaN	1.11543	0.599757
MDBSrug1_05333.1	NaN	NaN	1.11133	2.44898				guanine phosphoribosyltransferase activity [GO:0052657]	endoplasmic reticulum [GO:0005783]; membrane [GO:0016020]	nucleoside metabolic process [GO:0009116]
MDBSrug1_11676.1	NaN	NaN	1.06953	1.16748				structural constituent of ribosome [GO:0003735]	ribosome [GO:0005840]	translation [GO:0006412]
MDBSrug1_05952.1	NaN	NaN	1.04605	0.95151				catalytic activity [GO:0003824]	membrane [GO:0016020]
MDBSrug1_07540.1	NaN	NaN	1.03336	0.813582				oxidoreductase activity, acting on CH-OH group of donors [GO:0016614]; flavin adenine dinucleotide binding [GO:0050660]		oxidation-reduction process [GO:0055114]
MDBSrug1_01681.1	NaN	NaN	1.024	1.20118				FMN binding [GO:0010181]; oxidoreductase activity [GO:0016491]; heme binding [GO:0020037]; metal ion binding [GO:0046872]		oxidation-reduction process [GO:0055114]
MDBSrug1_01252.1	NaN	NaN	1.01653	1.23766				L-leucine transaminase activity [GO:0052654]; L-valine transaminase activity [GO:0052655]; L-isoleucine transaminase activity [GO:0052656]		branched-chain amino acid biosynthetic process [GO:0009082]
MDBSrug1_12153.1	NaN	NaN	1.01635	1.04212
MDBSrug1_06185.1	NaN	NaN	1.00381	1.16732
MDBSrug1_12537.1	NaN	NaN	0.991715	1.54762
MDBSrug1_07228.1	NaN	NaN	0.980767	1.22708				FMN binding [GO:0010181]; oxidoreductase activity [GO:0016491]		oxidation-reduction process [GO:0055114]
MDBSrug1_06942.1	NaN	NaN	0.978437	2.13586
MDBSrug1_00062.1	NaN	NaN	0.977512	0.733022				hydrolase activity [GO:0016787]; carbohydrate binding [GO:0030246]		carbohydrate metabolic process [GO:0005975]
MDBSrug1_00630.2	NaN	NaN	0.951178	0.544658
MDBSrug1_06668.1	NaN	NaN	0.925214	1.20616				nucleic acid binding [GO:0003676]; RNA-DNA hybrid ribonuclease activity [GO:0004523]; hydrolase activity, acting on carbon-nitrogen (but not peptide) bonds [GO:0016810]	integral component of membrane [GO:0016021]	carbohydrate metabolic process [GO:0005975]; RNA phosphodiester bond hydrolysis, endonucleolytic [GO:0090502]
MDBSrug1_10555.1	NaN	NaN	0.914451	0.868194				ATP binding [GO:0005524]	cytoplasm [GO:0005737]; cytoskeleton [GO:0005856]
MDBSrug1_05779.1	NaN	NaN	0.911936	0.735293				mRNA binding [GO:0003729]; hydrolase activity [GO:0016787]	mRNA cleavage factor complex [GO:0005849]	mRNA polyadenylation [GO:0006378]
MDBSrug1_08953.1	NaN	NaN	0.903909	0.784634				catalytic activity [GO:0003824]
MDBSrug1_09136.1	NaN	NaN	0.897992	0.357567
MDBSrug1_03224.1	NaN	NaN	0.896623	0.45818
MDBSrug1_04294.1	NaN	NaN	0.892037	0.643098				malate dehydrogenase (decarboxylating) (NAD+) activity [GO:0004471]; metal ion binding [GO:0046872]; NAD binding [GO:0051287]		malate metabolic process [GO:0006108]; oxidation-reduction process [GO:0055114]
MDBSrug1_08072.1	NaN	NaN	0.88623	0.638394					ubiquitin ligase complex [GO:0000151]; nucleus [GO:0005634]; cytosol [GO:0005829]
MDBSrug1_00175.1	NaN	NaN	0.874579	0.360681
MDBSrug1_09069.1	NaN	NaN	0.868366	0.941091
MDBSrug1_11186.1	NaN	NaN	0.843807	0.404691
MDBSrug1_08688.1	NaN	NaN	0.823649	1.11085
MDBSrug1_00462.1	NaN	NaN	0.804823	0.907115					integral component of membrane [GO:0016021]
MDBSrug1_05390.1	NaN	NaN	0.779265	0.491263				isocitrate lyase activity [GO:0004451]; methylisocitrate lyase activity [GO:0046421]; metal ion binding [GO:0046872]	glyoxysome [GO:0009514]	glyoxylate cycle [GO:0006097]; tricarboxylic acid cycle [GO:0006099]
MDBSrug1_07797.1	NaN	NaN	0.765469	0.758849
MDBSrug1_08256.1	NaN	NaN	0.765137	0.786864				acyl-CoA dehydrogenase activity [GO:0003995]; flavin adenine dinucleotide binding [GO:0050660]		oxidation-reduction process [GO:0055114]
MDBSrug1_00484.1	NaN	NaN	0.731442	0.70225				alcohol oxidase activity [GO:0047639]; flavin adenine dinucleotide binding [GO:0050660]		oxidation-reduction process [GO:0055114]
MDBSrug1_02217.1;MDBSrug1_12052.1	NaN	NaN	0.726412	0.735374
MDBSrug1_11662.1	NaN	NaN	0.726338	0.6746				hydrolase activity, acting on glycosyl bonds [GO:0016798]	fungal-type cell wall [GO:0009277]	metabolic process [GO:0008152]; response to stimulus [GO:0050896]
MDBSrug1_07288.1	NaN	NaN	0.677479	1.5048				hydrolase activity [GO:0016787]
MDBSrug1_09092.1	NaN	NaN	0.672486	1.72244				COPII adaptor activity [GO:0097020]	endoplasmic reticulum [GO:0005783]; Golgi apparatus [GO:0005794]; integral component of membrane [GO:0016021]; ER to Golgi transport vesicle [GO:0030134]	ER to Golgi vesicle-mediated transport [GO:0006888]
MDBSrug1_05003.1	NaN	NaN	0.64175	1.36967
MDBSrug1_08619.1	NaN	NaN	0.633835	0.0692033						ribosome biogenesis [GO:0042254]; single-organism cellular process [GO:0044763]
MDBSrug1_10392.1	NaN	NaN	0.621297	0.370967				catalytic activity [GO:0003824]; molybdenum ion binding [GO:0030151]; pyridoxal phosphate binding [GO:0030170]	membrane [GO:0016020]
MDBSrug1_08033.1	NaN	NaN	0.618634	0.62984
MDBSrug1_04637.1	NaN	NaN	0.616932	0.661991
MDBSrug1_04248.1	NaN	NaN	0.613197	0.741212				ferric iron binding [GO:0008199]; catechol 1,2-dioxygenase activity [GO:0018576]		catechol-containing compound metabolic process [GO:0009712]; oxidation-reduction process [GO:0055114]
MDBSrug1_05875.1	NaN	NaN	0.611791	0.360843
MDBSrug1_00268.1	NaN	NaN	0.611347	0.49475
MDBSrug1_03949.1	NaN	NaN	0.605651	0.603081
MDBSrug1_00796.1	NaN	NaN	0.582461	0.935658
MDBSrug1_12177.1	NaN	NaN	0.577394	0.351551				monooxygenase activity [GO:0004497]; iron ion binding [GO:0005506]; oxidoreductase activity, acting on paired donors, with incorporation or reduction of molecular oxygen [GO:0016705]; heme binding [GO:0020037]	membrane [GO:0016020]	oxidation-reduction process [GO:0055114]
MDBSrug1_04136.1	NaN	NaN	0.567851	0.47983
MDBSrug1_00832.1	NaN	NaN	0.567149	0.797284
MDBSrug1_11732.1;MDBSrug1_04892.1	NaN	NaN	0.564634	0.546037				catalytic activity [GO:0003824]
MDBSrug1_03384.1	NaN	NaN	0.564116	0.54328					membrane [GO:0016020]
MDBSrug1_11793.1	NaN	NaN	0.561564	0.558159
MDBSrug1_01946.1	NaN	NaN	0.556977	0.196902
MDBSrug1_04704.1	NaN	NaN	0.546067	0.437421					membrane [GO:0016020]
MDBSrug1_02394.1	NaN	NaN	0.543219	1.00624
MDBSrug1_08156.4	NaN	NaN	0.539705	1.31344
MDBSrug1_12269.1	NaN	NaN	0.53804	0.292544
MDBSrug1_02897.1	NaN	NaN	0.537893	0.391007				proton-transporting ATPase activity, rotational mechanism [GO:0046961]	nucleus [GO:0005634]; cytosol [GO:0005829]; proton-transporting V-type ATPase, V1 domain [GO:0033180]	ATP hydrolysis coupled proton transport [GO:0015991]
MDBSrug1_03532.1	NaN	NaN	0.536487	0.647719				oxidoreductase activity [GO:0016491]; metal ion binding [GO:0046872]
MDBSrug1_10126.1	NaN	NaN	0.53179	0.22538				protein kinase activity [GO:0004672]; ATP binding [GO:0005524]	membrane [GO:0016020]	protein phosphorylation [GO:0006468]
MDBSrug1_08449.1	NaN	NaN	0.526316	0.123422				catalase activity [GO:0004096]; heme binding [GO:0020037]	cytoplasm [GO:0005737]	response to hydrogen peroxide [GO:0042542]; hydrogen peroxide catabolic process [GO:0042744]; oxidation-reduction process [GO:0055114]; cellular oxidant detoxification [GO:0098869]
MDBSrug1_07149.1	NaN	NaN	0.522543	0.354279				RNA polymerase I activity [GO:0001054]; DNA binding [GO:0003677]; zinc ion binding [GO:0008270]	DNA-directed RNA polymerase II, core complex [GO:0005665]; DNA-directed RNA polymerase III complex [GO:0005666]; DNA-directed RNA polymerase I complex [GO:0005736]	transcription, RNA-templated [GO:0001172]; transcription from RNA polymerase I promoter [GO:0006360]; transcription from RNA polymerase II promoter [GO:0006366]; tRNA transcription from RNA polymerase III promoter [GO:0042797]
MDBSrug1_12135.1	NaN	NaN	0.517439	0.625096					nucleus [GO:0005634]; cytosol [GO:0005829]; proteasome regulatory particle [GO:0005838]	proteolysis [GO:0006508]; proteasome regulatory particle assembly [GO:0070682]
MDBSrug1_06940.1	NaN	NaN	0.513925	0.461747					integral component of membrane [GO:0016021]	transport [GO:0006810]
MDBSrug1_02311.1	NaN	NaN	0.513408	0.5552				organic cyclic compound binding [GO:0097159]; heterocyclic compound binding [GO:1901363]
MDBSrug1_06930.1	NaN	NaN	0.509006	0.630448				homoaconitate hydratase activity [GO:0004409]; metal ion binding [GO:0046872]; 4 iron, 4 sulfur cluster binding [GO:0051539]	mitochondrion [GO:0005739]	lysine biosynthetic process via aminoadipic acid [GO:0019878]
MDBSrug1_07319.1	NaN	NaN	0.506676	0.621366
MDBSrug1_07545.1	NaN	NaN	0.493546	1.30322					integral component of membrane [GO:0016021]	transmembrane transport [GO:0055085]
MDBSrug1_07505.1	NaN	NaN	0.492288	0.227448
MDBSrug1_02030.1	NaN	NaN	0.476199	0.201983				aspartic-type endopeptidase activity [GO:0004190]		proteolysis [GO:0006508]
MDBSrug1_01578.1	NaN	NaN	0.469986	0.24688				zinc ion binding [GO:0008270]; oxidoreductase activity [GO:0016491]		oxidation-reduction process [GO:0055114]
MDBSrug1_07227.1	NaN	NaN	0.467027	0.54032				oxidoreductase activity [GO:0016491]	membrane [GO:0016020]
MDBSrug1_07194.1;MDBSrug1_05982.1	NaN	NaN	0.464807	0.752321
MDBSrug1_09670.1	NaN	NaN	0.463069	0.428461				oxidoreductase activity [GO:0016491]
MDBSrug1_07946.1	NaN	NaN	0.462144	0.610095
MDBSrug1_04461.1	NaN	NaN	0.455561	0.409568				oxidoreductase activity [GO:0016491]	integral component of membrane [GO:0016021]	oxidation-reduction process [GO:0055114]
MDBSrug1_03379.1	NaN	NaN	0.443614	0.495236				protein farnesyltransferase activity [GO:0004660]	nucleus [GO:0005634]; cytosol [GO:0005829]; protein farnesyltransferase complex [GO:0005965]	protein farnesylation [GO:0018343]; regulation of cell proliferation [GO:0042127]
MDBSrug1_01107.1	NaN	NaN	0.439731	0.3382
MDBSrug1_11944.1;MDBSrug1_01261.1	NaN	NaN	0.43925	0.935779
MDBSrug1_02751.1	NaN	NaN	0.434886	0.308555				catalytic activity [GO:0003824]	membrane [GO:0016020]; intracellular membrane-bounded organelle [GO:0043231]	metabolic process [GO:0008152]
MDBSrug1_12640.1	NaN	NaN	0.432149	0.662356				nucleotide binding [GO:0000166]; monooxygenase activity [GO:0004497]; coenzyme binding [GO:0050662]
MDBSrug1_01139.2	NaN	NaN	0.431261	0.655747				hydrolase activity [GO:0016787]
MDBSrug1_00621.1	NaN	NaN	0.431002	1.32175				D-arabinose 1-dehydrogenase [NAD(P)+] activity [GO:0045290]		oxidation-reduction process [GO:0055114]; dehydro-D-arabinono-1,4-lactone biosynthetic process [GO:0070485]
MDBSrug1_04092.1	NaN	NaN	0.427229	0.610947				catalytic activity [GO:0003824]
MDBSrug1_01520.1	NaN	NaN	0.42612	0.22716
MDBSrug1_08671.1	NaN	NaN	0.424603	0.190237				GTPase activity [GO:0003924]; GTP binding [GO:0005525]; GDP binding [GO:0019003]	nucleus [GO:0005634]; cytosol [GO:0005829]; extrinsic component of plasma membrane [GO:0019897]	small GTPase mediated signal transduction [GO:0007264]; regulation of L-arginine import [GO:0010963]; lysine transport [GO:0015819]; retrograde transport, endosome to Golgi [GO:0042147]
MDBSrug1_02242.1	NaN	NaN	0.415542	0.817434				ATP binding [GO:0005524]; ATPase activity [GO:0016887]	nucleus [GO:0005634]; cytosol [GO:0005829]; CCR4-NOT complex [GO:0030014]	regulation of transcription from RNA polymerase II promoter [GO:0006357]
MDBSrug1_09662.1	NaN	NaN	0.415394	0.221269
MDBSrug1_02727.1;MDBSrug1_03875.1;MDBSrug1_07262.1;MDBSrug1_08617.1;MDBSrug1_00025.1;MDBSrug1_07024.1	NaN	NaN	0.41458	0.544212				nucleotide binding [GO:0000166]; ATPase activity [GO:0016887]	membrane [GO:0016020]	transport [GO:0006810]
MDBSrug1_12456.1	NaN	NaN	0.406221	0.462396					membrane [GO:0016020]
MDBSrug1_02101.1	NaN	NaN	0.405518	0.123256
MDBSrug1_12406.1	NaN	NaN	0.401709	0.72163				binding [GO:0005488]; oxidoreductase activity [GO:0016491]
MDBSrug1_09413.1;MDBSrug1_09855.1	NaN	NaN	0.401487	0.624245
MDBSrug1_06250.1	NaN	NaN	0.398491	0.0906021					cytosol [GO:0005829]; SWI/SNF complex [GO:0016514]; RSC complex [GO:0016586]	chromatin remodeling [GO:0006338]; regulation of transcription from RNA polymerase II promoter [GO:0006357]
MDBSrug1_06138.1	NaN	NaN	0.385139	1.72349
MDBSrug1_05553.1	NaN	NaN	0.384769	1.45915				oxidoreductase activity, acting on NAD(P)H [GO:0016651]; 4 iron, 4 sulfur cluster binding [GO:0051539]	membrane [GO:0016020]	oxidation-reduction process [GO:0055114]
MDBSrug1_08254.1	NaN	NaN	0.381477	0.410298				peroxidase activity [GO:0004601]; heme binding [GO:0020037]; metal ion binding [GO:0046872]		response to oxidative stress [GO:0006979]; oxidation-reduction process [GO:0055114]; cellular oxidant detoxification [GO:0098869]
MDBSrug1_02008.1	NaN	NaN	0.380627	0.163693				RNA polymerase II core promoter proximal region sequence-specific DNA binding [GO:0000978]; transcription factor activity, RNA polymerase II transcription factor binding [GO:0001076]; transcriptional activator activity, RNA polymerase II core promoter proximal region sequence-specific binding [GO:0001077]; transcriptional repressor activity, RNA polymerase II core promoter proximal region sequenc…	kinetochore [GO:0000776]; nucleus [GO:0005634]; mitochondrion [GO:0005739]; Cbf1-Met4-Met28 complex [GO:0089713]	chromatin remodeling [GO:0006338]; chromosome segregation [GO:0007059]; methionine biosynthetic process [GO:0009086]; negative regulation of ceramide biosynthetic process by negative regulation of transcription from RNA Polymerase II promoter [GO:0061427]; regulation of transcription from RNA polymerase II promoter in response to methionine [GO:0061432]; positive regulation of inositol biosynthet…
MDBSrug1_08505.1	NaN	NaN	0.37874	0.229666				RNA binding [GO:0003723]; glutamate 5-kinase activity [GO:0004349]	cytoplasm [GO:0005737]; integral component of membrane [GO:0016021]	proline biosynthetic process [GO:0006561]; phosphorylation [GO:0016310]
MDBSrug1_01254.1	NaN	NaN	0.378592	0.781756				FMN binding [GO:0010181]; oxidoreductase activity [GO:0016491]		oxidation-reduction process [GO:0055114]
MDBSrug1_00284.1	NaN	NaN	0.377594	0.285668
MDBSrug1_01234.1	NaN	NaN	0.375633	0.450436				gamma-glutamyltransferase activity [GO:0003840]	integral component of membrane [GO:0016021]	glutathione metabolic process [GO:0006749]
MDBSrug1_11925.1	NaN	NaN	0.372009	0.491466
MDBSrug1_09139.1	NaN	NaN	0.370455	0.133562				phosphogluconate dehydrogenase (decarboxylating) activity [GO:0004616]; 3-hydroxyisobutyrate dehydrogenase activity [GO:0008442]; NAD binding [GO:0051287]		valine catabolic process [GO:0006574]; oxidation-reduction process [GO:0055114]
MDBSrug1_11344.1;MDBSrug1_05051.1;MDBSrug1_01727.1;MDBSrug1_00584.3	NaN	NaN	0.361667	0.206872				hydrolase activity [GO:0016787]
MDBSrug1_01798.1	NaN	NaN	0.359178	0.730752				translation initiation factor activity [GO:0003743]	cytoplasm [GO:0005737]	translational initiation [GO:0006413]
MDBSrug1_01426.1	NaN	NaN	0.35633	0.493209				glucan 1,4-alpha-glucosidase activity [GO:0004339]; starch binding [GO:2001070]	integral component of membrane [GO:0016021]	polysaccharide catabolic process [GO:0000272]
MDBSrug1_12007.1	NaN	NaN	0.34688	0.290278
MDBSrug1_03755.1	NaN	NaN	0.344206	0.203248				malate dehydrogenase (decarboxylating) (NAD+) activity [GO:0004471]; metal ion binding [GO:0046872]; NAD binding [GO:0051287]		malate metabolic process [GO:0006108]; oxidation-reduction process [GO:0055114]
MDBSrug1_05179.1	NaN	NaN	0.335122	0.292771
MDBSrug1_12744.1	NaN	NaN	0.333987	0.236023				phenylalanine ammonia-lyase activity [GO:0045548]	cytoplasm [GO:0005737]	L-phenylalanine catabolic process [GO:0006559]; cinnamic acid biosynthetic process [GO:0009800]
MDBSrug1_09859.1;MDBSrug1_06816.1	NaN	NaN	0.328701	0.0571498
MDBSrug1_10674.1	NaN	NaN	0.325373	0.282449				ATP binding [GO:0005524]; hydrolase activity [GO:0016787]; metal ion binding [GO:0046872]	integral component of membrane [GO:0016021]
MDBSrug1_11855.1	NaN	NaN	0.324629	0.283568
MDBSrug1_00551.1	NaN	NaN	0.319126	0.44999
MDBSrug1_01673.1	NaN	NaN	0.316333	0.24032
MDBSrug1_07081.1	NaN	NaN	0.308015	0.0701966
MDBSrug1_04071.1	NaN	NaN	0.302522	1.01054					integral component of membrane [GO:0016021]
MDBSrug1_05426.1	NaN	NaN	0.297196	0.304204
MDBSrug1_12277.1	NaN	NaN	0.293564	0.0858342
MDBSrug1_10532.1	NaN	NaN	0.28802	1.13282
MDBSrug1_05565.1	NaN	NaN	0.277501	0.169811				hydrolase activity [GO:0016787]; organic cyclic compound binding [GO:0097159]; heterocyclic compound binding [GO:1901363]
MDBSrug1_11193.1	NaN	NaN	0.27347	0.305307				ATP binding [GO:0005524]; MAP kinase activity involved in cell wall organization or biogenesis [GO:0038067]	nucleus [GO:0005634]; cytosol [GO:0005829]; cell division site [GO:0032153]; mitotic spindle pole body [GO:0044732]	MAPK cascade involved in cell wall organization or biogenesis [GO:0000196]; positive regulation of calcium ion transport into cytosol [GO:0010524]; peptidyl-threonine phosphorylation [GO:0018107]; positive regulation of calcium-mediated signaling involved in cellular response to salt stress [GO:1901196]
MDBSrug1_02501.1	NaN	NaN	0.273388	0.0946888					nucleus [GO:0005634]; cytosol [GO:0005829]; prefoldin complex [GO:0016272]	protein folding [GO:0006457]
MDBSrug1_07708.1	NaN	NaN	0.271668	0.0767525
MDBSrug1_07704.1	NaN	NaN	0.270681	0.394798
MDBSrug1_03723.1	NaN	NaN	0.270119	0.0825096				catalytic activity [GO:0003824]		biosynthetic process [GO:0009058]
MDBSrug1_12460.1	NaN	NaN	0.270019	0.706021
MDBSrug1_09140.1	NaN	NaN	0.269438	0.381216					cytosol [GO:0005829]
MDBSrug1_10285.1	NaN	NaN	0.267522	0.0508007				organic cyclic compound binding [GO:0097159]; heterocyclic compound binding [GO:1901363]
MDBSrug1_09045.1	NaN	NaN	0.264327	0.609933					membrane [GO:0016020]
MDBSrug1_08544.1	NaN	NaN	0.262869	0.444962				acetyl-CoA:L-glutamate N-acetyltransferase activity [GO:0004042]
MDBSrug1_00812.1	NaN	NaN	0.261993	0.0339481				kinase activity [GO:0016301]; protein serine/threonine kinase inhibitor activity [GO:0030291]	protein kinase CK2 complex [GO:0005956]; UTP-C complex [GO:0034456]	regulation of transcription from RNA polymerase I promoter [GO:0006356]; regulation of transcription from RNA polymerase III promoter [GO:0006359]; cellular response to DNA damage stimulus [GO:0006974]; negative regulation of protein serine/threonine kinase activity [GO:0071901]
MDBSrug1_00107.1	NaN	NaN	0.257625	0.0525684
MDBSrug1_06340.1	NaN	NaN	0.25744	0.191247				GTP binding [GO:0005525]	cell tip [GO:0051286]	cytoplasmic translation [GO:0002181]
MDBSrug1_00496.1	NaN	NaN	0.253752	0.389714				xylulokinase activity [GO:0004856]	nucleus [GO:0005634]; cytosol [GO:0005829]	xylulose catabolic process [GO:0005998]; carbohydrate phosphorylation [GO:0046835]
MDBSrug1_00298.1	NaN	NaN	0.252772	0.145846					nuclear envelope [GO:0005635]; cytosol [GO:0005829]; TRAPPI protein complex [GO:1990070]; TRAPPII protein complex [GO:1990071]; TRAPPIII protein complex [GO:1990072]	ER to Golgi vesicle-mediated transport [GO:0006888]
MDBSrug1_07130.3	NaN	NaN	0.250105	0.0456193				protein disulfide isomerase activity [GO:0003756]; oxidoreductase activity, acting on a sulfur group of donors, disulfide as acceptor [GO:0016671]	endoplasmic reticulum [GO:0005783]	oxidation-reduction process [GO:0055114]
MDBSrug1_00101.1	NaN	NaN	0.248201	0.0587878					MICOS complex [GO:0061617]	cristae formation [GO:0042407]
MDBSrug1_08211.1	NaN	NaN	0.248016	0.284107				calcium ion binding [GO:0005509]; calcium-dependent phospholipid binding [GO:0005544]
MDBSrug1_10082.2	NaN	NaN	0.240622	0.185733					mitochondrion [GO:0005739]; integral component of membrane [GO:0016021]
MDBSrug1_11650.1	NaN	NaN	0.236668	0.210971				deaminase activity [GO:0019239]	extracellular space [GO:0005615]	purine ribonucleoside monophosphate biosynthetic process [GO:0009168]
MDBSrug1_02936.1	NaN	NaN	0.234179	0.22808				transporter activity [GO:0005215]	integral component of membrane [GO:0016021]	transmembrane transport [GO:0055085]
MDBSrug1_03109.1	NaN	NaN	0.228583	0.448814				oxidoreductase activity, acting on CH-OH group of donors [GO:0016614]
MDBSrug1_03600.1	NaN	NaN	0.227007	0.143
MDBSrug1_03979.2	NaN	NaN	0.226904	0.257166
MDBSrug1_02592.1	NaN	NaN	0.225014	0.0746969				transporter activity [GO:0005215]	integral component of membrane [GO:0016021]	transport [GO:0006810]
MDBSrug1_09484.1	NaN	NaN	0.22329	0.448571
MDBSrug1_05849.1	NaN	NaN	0.213899	0.895601
MDBSrug1_11463.1	NaN	NaN	0.212738	0.0872978
MDBSrug1_00912.1	NaN	NaN	0.21097	0.269167
MDBSrug1_08377.1	NaN	NaN	0.208451	0.0812366				zinc ion binding [GO:0008270]; pre-mRNA branch point binding [GO:0045131]	commitment complex [GO:0000243]; cytosol [GO:0005829]; U2-type prespliceosome [GO:0071004]	mRNA splicing, via spliceosome [GO:0000398]
MDBSrug1_01783.1;MDBSrug1_05732.1	NaN	NaN	0.206376	0.58131				hydrolase activity, acting on carbon-nitrogen (but not peptide) bonds, in linear amidines [GO:0016813]; metal ion binding [GO:0046872]
MDBSrug1_05847.1	NaN	NaN	0.202678	0.0990553
MDBSrug1_09839.1	NaN	NaN	0.198032	0.304885				oxidoreductase activity, acting on CH-OH group of donors [GO:0016614]; flavin adenine dinucleotide binding [GO:0050660]	integral component of membrane [GO:0016021]	oxidation-reduction process [GO:0055114]
MDBSrug1_08051.1	NaN	NaN	0.196294	0.241614
MDBSrug1_05218.1	NaN	NaN	0.195846	0.356367
MDBSrug1_00433.1	NaN	NaN	0.195821	0.372499					integral component of membrane [GO:0016021]
MDBSrug1_02303.1	NaN	NaN	0.194341	0.0345052
MDBSrug1_02871.2	NaN	NaN	0.191012	0.133704				oxidoreductase activity [GO:0016491]; metal ion binding [GO:0046872]		single-organism process [GO:0044699]
MDBSrug1_01239.1	NaN	NaN	0.188682	0.584715				iron ion binding [GO:0005506]; heme binding [GO:0020037]; fatty acid alpha-hydroxylase activity [GO:0080132]	endoplasmic reticulum membrane [GO:0005789]; integral component of membrane [GO:0016021]	fatty acid biosynthetic process [GO:0006633]; mannosyl-inositol phosphorylceramide metabolic process [GO:0006675]; oxidation-reduction process [GO:0055114]
MDBSrug1_05217.1	NaN	NaN	0.188371	0.186986				serine-type endopeptidase activity [GO:0004252]	integral component of membrane [GO:0016021]	proteolysis [GO:0006508]
MDBSrug1_06407.1	NaN	NaN	0.187073	0.0576525
MDBSrug1_08656.1	NaN	NaN	0.186703	0.346836				oxidoreductase activity, acting on the CH-CH group of donors, NAD or NADP as acceptor [GO:0016628]	endoplasmic reticulum [GO:0005783]; integral component of membrane [GO:0016021]	oxidation-reduction process [GO:0055114]
MDBSrug1_10976.1	NaN	NaN	0.182883	0.13764				protein serine/threonine phosphatase inhibitor activity [GO:0004865]	nucleus [GO:0005634]; cytosol [GO:0005829]; cell tip [GO:0051286]	positive regulation of conjugation with cellular fusion [GO:0031139]; negative regulation of protein dephosphorylation [GO:0035308]; cellular response to glucose starvation [GO:0042149]; positive regulation of mitotic metaphase/anaphase transition [GO:0045842]; negative regulation of hydroxymethylglutaryl-CoA reductase (NADPH) activity [GO:2001216]
MDBSrug1_02908.1	NaN	NaN	0.180926	0.162497				protein serine/threonine phosphatase activity [GO:0004722]	nucleus [GO:0005634]; cytoplasm [GO:0005737]	protein dephosphorylation [GO:0006470]
MDBSrug1_08881.1	NaN	NaN	0.180897	0.103114				chromatin binding [GO:0003682]; mRNA binding [GO:0003729]	kinetochore [GO:0000776]; cytoplasmic mRNA processing body [GO:0000932]; nucleus [GO:0005634]; cytoplasmic stress granule [GO:0010494]; cytosolic small ribosomal subunit [GO:0022627]	deadenylation-dependent decapping of nuclear-transcribed mRNA [GO:0000290]; formation of translation preinitiation complex [GO:0001731]; chromosome segregation [GO:0007059]; cytoplasmic mRNA processing body assembly [GO:0033962]; negative regulation of translational initiation [GO:0045947]; CENP-A containing chromatin organization [GO:0061641]
MDBSrug1_11097.1	NaN	NaN	0.179646	0.014643						biological regulation [GO:0065007]
MDBSrug1_07249.1	NaN	NaN	0.178123	0.253517				sulfite reductase (NADPH) activity [GO:0004783]; FMN binding [GO:0010181]; heme binding [GO:0020037]; NADP binding [GO:0050661]; 4 iron, 4 sulfur cluster binding [GO:0051539]	cytosol [GO:0005829]; sulfite reductase complex (NADPH) [GO:0009337]	sulfur amino acid biosynthetic process [GO:0000097]; sulfate assimilation [GO:0000103]; fungal-type cell wall organization [GO:0031505]; oxidation-reduction process [GO:0055114]; hydrogen sulfide biosynthetic process [GO:0070814]
MDBSrug1_12752.1	NaN	NaN	0.177875	0.31089
MDBSrug1_01179.1	NaN	NaN	0.174635	0.185623
MDBSrug1_03220.1	NaN	NaN	0.174328	0.0316647						cellular process [GO:0009987]
MDBSrug1_07616.1;MDBSrug1_08812.1	NaN	NaN	0.169105	0.0430407
MDBSrug1_11429.1	NaN	NaN	0.168754	0.0304796				oxidoreductase activity, acting on CH-OH group of donors [GO:0016614]; flavin adenine dinucleotide binding [GO:0050660]	integral component of membrane [GO:0016021]	oxidation-reduction process [GO:0055114]
MDBSrug1_08104.1	NaN	NaN	0.167197	0.221857
MDBSrug1_04008.2	NaN	NaN	0.165222	0.144306
MDBSrug1_11251.1	NaN	NaN	0.16237	0.909629				dioxygenase activity [GO:0051213]		oxidation-reduction process [GO:0055114]
MDBSrug1_05997.1	NaN	NaN	0.162318	0.552564
MDBSrug1_03070.1	NaN	NaN	0.159393	0.166004					intracellular [GO:0005622]
MDBSrug1_12371.1	NaN	NaN	0.158438	0.0801622				isocitrate lyase activity [GO:0004451]		carboxylic acid metabolic process [GO:0019752]
MDBSrug1_06663.1	NaN	NaN	0.154943	0.137859				C-22 sterol desaturase activity [GO:0000249]; monooxygenase activity [GO:0004497]; iron ion binding [GO:0005506]; heme binding [GO:0020037]	endoplasmic reticulum [GO:0005783]; integral component of membrane [GO:0016021]	protein targeting to vacuole [GO:0006623]; ergosterol biosynthetic process [GO:0006696]; endocytosis [GO:0006897]; oxidation-reduction process [GO:0055114]; protein insertion into membrane raft [GO:0071210]
MDBSrug1_04563.1	NaN	NaN	0.154255	0.152929				aspartate carbamoyltransferase activity [GO:0004070]; carbamoyl-phosphate synthase (glutamine-hydrolyzing) activity [GO:0004088]; ATP binding [GO:0005524]; amino acid binding [GO:0016597]; metal ion binding [GO:0046872]		'de novo' pyrimidine nucleobase biosynthetic process [GO:0006207]; glutamine metabolic process [GO:0006541]
MDBSrug1_01213.1	NaN	NaN	0.153871	0.178313					integral component of membrane [GO:0016021]; mitochondrial membrane [GO:0031966]
MDBSrug1_06675.1	NaN	NaN	0.151818	0.547294				translation initiation factor activity [GO:0003743]	mitochondrion [GO:0005739]; ribosome [GO:0005840]	translational initiation [GO:0006413]
MDBSrug1_07246.1	NaN	NaN	0.150179	0.13179				DNA binding [GO:0003677]; DNA-directed RNA polymerase activity [GO:0003899]; protein dimerization activity [GO:0046983]	DNA-directed RNA polymerase II, core complex [GO:0005665]; cytosol [GO:0005829]	transcription, RNA-templated [GO:0001172]; termination of RNA polymerase II transcription [GO:0006369]
MDBSrug1_07427.1	NaN	NaN	0.145364	0.118857
MDBSrug1_07052.1	NaN	NaN	0.144846	0.161038
MDBSrug1_06571.1	NaN	NaN	0.142394	0.081419				aconitate hydratase activity [GO:0003994]; hydrolase activity, hydrolyzing O-glycosyl compounds [GO:0004553]; metal ion binding [GO:0046872]; 4 iron, 4 sulfur cluster binding [GO:0051539]	nucleus [GO:0005634]; mitochondrion [GO:0005739]	carbohydrate metabolic process [GO:0005975]; tricarboxylic acid cycle [GO:0006099]
MDBSrug1_11028.1	NaN	NaN	0.138144	0.104314
MDBSrug1_06984.1	NaN	NaN	0.137822	0.153521
MDBSrug1_08027.1	NaN	NaN	0.136635	0.0524671				signal transducer activity [GO:0004871]; Ran guanyl-nucleotide exchange factor activity [GO:0005087]	nuclear chromatin [GO:0000790]; mitotic spindle midzone [GO:1990023]	ribosomal subunit export from nucleus [GO:0000054]; rRNA export from nucleus [GO:0006407]; regulation of exit from mitosis [GO:0007096]; negative regulation of G2/M transition of mitotic cell cycle [GO:0010972]; Ran protein signal transduction [GO:0031291]; regulation of mitotic spindle elongation [GO:0032888]; positive regulation of GTPase activity [GO:0043547]; positive regulation of protein ex…
MDBSrug1_09250.1	NaN	NaN	0.136321	0.0821488
MDBSrug1_09930.1	NaN	NaN	0.135544	0.0265713				DNA binding [GO:0003677]; RNA binding [GO:0003723]; DNA-directed RNA polymerase activity [GO:0003899]; ribonucleoside binding [GO:0032549]	DNA-directed RNA polymerase II, core complex [GO:0005665]; cytosol [GO:0005829]; nuclear pericentric heterochromatin [GO:0031618]	transcription, RNA-templated [GO:0001172]; transcription from RNA polymerase II promoter [GO:0006366]; chromatin silencing by small RNA [GO:0031048]
MDBSrug1_10288.1	NaN	NaN	0.133469	0.0951551				GTPase activator activity [GO:0005096]		positive regulation of GTPase activity [GO:0043547]
MDBSrug1_05399.1	NaN	NaN	0.133092	0.0788121					nucleus [GO:0005634]; TRC complex [GO:0072380]	posttranslational protein targeting to membrane [GO:0006620]; protein insertion into ER membrane [GO:0045048]
MDBSrug1_04012.1	NaN	NaN	0.131749	0.298776				oxidoreductase activity, acting on the CH-OH group of donors, NAD or NADP as acceptor [GO:0016616]; NAD binding [GO:0051287]		regulation of transcription, DNA-templated [GO:0006355]; oxidation-reduction process [GO:0055114]
MDBSrug1_06124.1	NaN	NaN	0.130118	0.132167
MDBSrug1_06113.1	NaN	NaN	0.125709	0.26148				calcium ion binding [GO:0005509]	cytosol [GO:0005829]; integral component of membrane [GO:0016021]; cell division site [GO:0032153]	intracellular protein transport [GO:0006886]
MDBSrug1_06307.1	NaN	NaN	0.123076	0.293314
MDBSrug1_04972.1	NaN	NaN	0.12187	0.100677				dCMP deaminase activity [GO:0004132]; zinc ion binding [GO:0008270]	nucleus [GO:0005634]; cytosol [GO:0005829]	dUMP biosynthetic process [GO:0006226]; dTMP biosynthetic process [GO:0006231]
MDBSrug1_11390.1	NaN	NaN	0.120786	0.0215633
MDBSrug1_00952.1	NaN	NaN	0.117842	0.201642				thiol-dependent ubiquitin-specific protease activity [GO:0004843]		ubiquitin-dependent protein catabolic process [GO:0006511]; protein deubiquitination [GO:0016579]
MDBSrug1_05022.1	NaN	NaN	0.117299	0.207237				nucleotide binding [GO:0000166]; ATPase activity [GO:0016887]	membrane [GO:0016020]	transport [GO:0006810]
MDBSrug1_04607.1	NaN	NaN	0.112376	0.241492				isomerase activity [GO:0016853]		metabolic process [GO:0008152]
MDBSrug1_01776.1	NaN	NaN	0.11232	0.329718				nucleic acid binding [GO:0003676]	nucleolus [GO:0005730]
MDBSrug1_00735.1	NaN	NaN	0.106095	0.0998743				zinc ion binding [GO:0008270]; oxidoreductase activity [GO:0016491]		oxidation-reduction process [GO:0055114]
MDBSrug1_01443.1	NaN	NaN	0.103177	0.0617109				structural constituent of ribosome [GO:0003735]	ribosome [GO:0005840]	translation [GO:0006412]
MDBSrug1_07952.1	NaN	NaN	0.102929	0.311121
MDBSrug1_06152.1	NaN	NaN	0.101908	0.241581				malate synthase activity [GO:0004474]		glyoxylate cycle [GO:0006097]; tricarboxylic acid cycle [GO:0006099]; tail-anchored membrane protein insertion into ER membrane [GO:0071816]
MDBSrug1_04046.1	NaN	NaN	0.100651	0.271518				RNA polymerase II transcription factor activity, sequence-specific DNA binding [GO:0000981]; DNA binding [GO:0003677]; zinc ion binding [GO:0008270]	nucleus [GO:0005634]	regulation of transcription from RNA polymerase II promoter [GO:0006357]
MDBSrug1_04943.1;MDBSrug1_10914.1;MDBSrug1_02596.1;MDBSrug1_06944.1;MDBSrug1_10631.2;MDBSrug1_05240.1;MDBSrug1_09534.1;MDBSrug1_09151.1	NaN	NaN	0.100011	0.116959
MDBSrug1_00823.1	NaN	NaN	0.0976107	0.0286406				nucleotide binding [GO:0000166]; protein kinase activity [GO:0004672]	cytoplasmic part [GO:0044444]	protein phosphorylation [GO:0006468]; single-organism cellular process [GO:0044763]; positive regulation of biological process [GO:0048518]; regulation of cellular process [GO:0050794]
MDBSrug1_07430.1	NaN	NaN	0.0956467	0.0713359				transferase activity [GO:0016740]; hydrolase activity [GO:0016787]	integral component of membrane [GO:0016021]	carbohydrate metabolic process [GO:0005975]
MDBSrug1_02060.2;MDBSrug1_02669.1;MDBSrug1_05203.1	NaN	NaN	0.094404	0.275528				nucleotide binding [GO:0000166]
MDBSrug1_01930.1	NaN	NaN	0.0908126	0.087614				DNA binding [GO:0003677]; protein dimerization activity [GO:0046983]	nucleus [GO:0005634]	regulation of transcription, DNA-templated [GO:0006355]
MDBSrug1_12354.1	NaN	NaN	0.0844287	0.24257				glutamate-5-semialdehyde dehydrogenase activity [GO:0004350]; NADP binding [GO:0050661]	cytosol [GO:0005829]	proline biosynthetic process [GO:0006561]; oxidation-reduction process [GO:0055114]
MDBSrug1_01396.1;MDBSrug1_04902.2	NaN	NaN	0.0824167	0.0833245
MDBSrug1_00383.1;MDBSrug1_06868.1	NaN	NaN	0.0816178	0.0810501
MDBSrug1_04510.1	NaN	NaN	0.081566	0.261131
MDBSrug1_07526.1	NaN	NaN	0.0802382	0.0784553				cofactor binding [GO:0048037]
MDBSrug1_10396.1	NaN	NaN	0.078866	0.0227403				RNA polymerase II transcription factor activity, sequence-specific DNA binding [GO:0000981]; DNA binding [GO:0003677]; zinc ion binding [GO:0008270]	nucleus [GO:0005634]; membrane [GO:0016020]	regulation of transcription from RNA polymerase II promoter [GO:0006357]
MDBSrug1_03229.1	NaN	NaN	0.0755076	0.00630286				protein binding [GO:0005515]
MDBSrug1_09801.1	NaN	NaN	0.074779	0.120665				protein transporter activity [GO:0008565]; identical protein binding [GO:0042802]	Golgi membrane [GO:0000139]; ER to Golgi transport vesicle membrane [GO:0012507]	intracellular protein transport [GO:0006886]; ER to Golgi vesicle-mediated transport [GO:0006888]; SNARE complex assembly [GO:0035493]; Golgi vesicle docking [GO:0048211]; vesicle fusion with Golgi apparatus [GO:0048280]
MDBSrug1_04685.1	NaN	NaN	0.0722417	0.0177077				DNA binding [GO:0003677]	nucleus [GO:0005634]; DNA replication factor C complex [GO:0005663]; cytosol [GO:0005829]; Rad17 RFC-like complex [GO:0031389]; Ctf18 RFC-like complex [GO:0031390]; Elg1 RFC-like complex [GO:0031391]	leading strand elongation [GO:0006272]; sister chromatid cohesion [GO:0007062]; UV-damage excision repair [GO:0070914]
MDBSrug1_02593.1	NaN	NaN	0.0715908	0.0912102				serine-type endopeptidase activity [GO:0004252]; serine-type exopeptidase activity [GO:0070008]		proteolysis [GO:0006508]
MDBSrug1_07279.1	NaN	NaN	0.0701631	0.0351437				protein binding [GO:0005515]	SCF ubiquitin ligase complex [GO:0019005]; nuclear part [GO:0044428]	ubiquitin-dependent protein catabolic process [GO:0006511]; protein ubiquitination [GO:0016567]; mitotic cell cycle phase transition [GO:0044772]
MDBSrug1_02968.1	NaN	NaN	0.0662389	0.0302242
MDBSrug1_09829.1	NaN	NaN	0.0659393	0.127537
MDBSrug1_03980.1	NaN	NaN	0.0583386	0.165571				RNA polymerase II core binding [GO:0000993]; RNA polymerase II regulatory region DNA binding [GO:0001012]; transcription factor activity, core RNA polymerase II recruiting [GO:0001139]; zinc ion binding [GO:0008270]	nucleus [GO:0005634]	maintenance of transcriptional fidelity during DNA-templated transcription elongation from RNA polymerase II promoter [GO:0001193]; transcription elongation from RNA polymerase I promoter [GO:0006362]; mRNA cleavage [GO:0006379]; regulation of mRNA 3'-end processing [GO:0031440]; transcription antitermination [GO:0031564]; positive regulation of transcription elongation from RNA polymerase II pro…
MDBSrug1_03297.1	NaN	NaN	0.0582572	0.187545				unfolded protein binding [GO:0051082]	nucleus [GO:0005634]; cytosol [GO:0005829]	ribosomal small subunit export from nucleus [GO:0000056]; response to osmotic stress [GO:0006970]; regulation of protein localization [GO:0032880]; cellular response to oxidative stress [GO:0034599]; ribosomal small subunit biogenesis [GO:0042274]
MDBSrug1_12116.3	NaN	NaN	0.0560676	0.0811676				nucleic acid binding [GO:0003676]; ATP binding [GO:0005524]; ATP-dependent helicase activity [GO:0008026]
MDBSrug1_03581.1	NaN	NaN	0.0481821	0.129751				malate dehydrogenase (decarboxylating) (NAD+) activity [GO:0004471]; metal ion binding [GO:0046872]; NAD binding [GO:0051287]		malate metabolic process [GO:0006108]; oxidation-reduction process [GO:0055114]
MDBSrug1_06305.1	NaN	NaN	0.0479269	0.0340162				ATP binding [GO:0005524]; ATPase activity [GO:0016887]; protein homodimerization activity [GO:0042803]	endoplasmic reticulum [GO:0005783]; endosome membrane [GO:0010008]	sterol metabolic process [GO:0016125]; late endosome to vacuole transport via multivesicular body sorting pathway [GO:0032511]; protein retention in Golgi apparatus [GO:0045053]; protein homooligomerization [GO:0051260]; intralumenal vesicle formation [GO:0070676]
MDBSrug1_05514.1	NaN	NaN	0.0462588	0.0480032
MDBSrug1_08235.1	NaN	NaN	0.0458668	0.231672				RNA polymerase II core promoter proximal region sequence-specific DNA binding [GO:0000978]; transcriptional activator activity, RNA polymerase II core promoter proximal region sequence-specific binding [GO:0001077]	nuclear chromatin [GO:0000790]; cytosol [GO:0005829]	regulation of lipid metabolic process [GO:0019216]; positive regulation of transcription from RNA polymerase II promoter [GO:0045944]
MDBSrug1_06224.1	NaN	NaN	0.0428487	0.037093
MDBSrug1_05812.1	NaN	NaN	0.0421238	0.0352962				DNA binding [GO:0003677]	intracellular [GO:0005622]	regulation of cellular process [GO:0050794]; response to stimulus [GO:0050896]
MDBSrug1_05700.1	NaN	NaN	0.0413396	0.0317048
MDBSrug1_11810.1	NaN	NaN	0.0409291	0.158151				kinase activity [GO:0016301]		phosphorylation [GO:0016310]
MDBSrug1_10743.1	NaN	NaN	0.040267	0.160762				ubiquitin-protein transferase activity [GO:0004842]; zinc ion binding [GO:0008270]	nucleus [GO:0005634]; cytosol [GO:0005829]; site of double-strand break [GO:0035861]	protein ubiquitination [GO:0016567]
MDBSrug1_01079.1	NaN	NaN	0.0381033	0.0573728				ATP binding [GO:0005524]; ATPase activity [GO:0016887]	integral component of membrane [GO:0016021]
MDBSrug1_08372.1	NaN	NaN	0.0376484	0.000535779
MDBSrug1_12364.1	NaN	NaN	0.0339586	0.148024					Prp19 complex [GO:0000974]; cytosol [GO:0005829]; U2-type catalytic step 1 spliceosome [GO:0071006]; U2-type catalytic step 2 spliceosome [GO:0071007]; post-mRNA release spliceosomal complex [GO:0071014]; post-spliceosomal complex [GO:0071020]	generation of catalytic spliceosome for second transesterification step [GO:0000350]; mRNA 3'-splice site recognition [GO:0000389]
MDBSrug1_07321.1	NaN	NaN	0.0336539	0.193501				RNA polymerase II core promoter proximal region sequence-specific DNA binding [GO:0000978]; transcription factor activity, RNA polymerase II core promoter proximal region sequence-specific binding [GO:0000982]	nucleus [GO:0005634]; integral component of membrane [GO:0016021]	regulation of transcription from RNA polymerase II promoter [GO:0006357]
MDBSrug1_07334.1	NaN	NaN	0.0329227	0.0118427
MDBSrug1_12720.1	NaN	NaN	0.0293391	0.0436205
MDBSrug1_08559.1	NaN	NaN	0.0282139	0.0906304
MDBSrug1_11923.1	NaN	NaN	0.0276565	0.00302283					nucleus [GO:0005634]	mRNA cis splicing, via spliceosome [GO:0045292]
MDBSrug1_06858.1	NaN	NaN	0.0248981	0.0337563				protein serine/threonine kinase activity [GO:0004674]; ATP binding [GO:0005524]		protein phosphorylation [GO:0006468]
MDBSrug1_01248.1	NaN	NaN	0.0223187	0.00806933					integral component of membrane [GO:0016021]
MDBSrug1_06840.1	NaN	NaN	0.0185819	0.00374109				rDNA binding [GO:0000182]; helicase activity [GO:0004386]; ATP binding [GO:0005524]; DNA-dependent ATPase activity [GO:0008094]; chromatin DNA binding [GO:0031490]; methylated histone binding [GO:0035064]; nucleosome-dependent ATPase activity [GO:0070615]	SAGA complex [GO:0000124]; mitochondrion [GO:0005739]; nucleolar chromatin [GO:0030874]; SLIK (SAGA-like) complex [GO:0046695]	regulation of transcriptional start site selection at RNA polymerase II promoter [GO:0001178]; termination of RNA polymerase I transcription [GO:0006363]; transcription elongation from RNA polymerase II promoter [GO:0006368]; termination of RNA polymerase II transcription [GO:0006369]; nucleosome positioning [GO:0016584]; chromatin organization involved in regulation of transcription [GO:0034401]…
MDBSrug1_11826.1	NaN	NaN	0.0172319	0.0143539				ARF guanyl-nucleotide exchange factor activity [GO:0005086]		regulation of ARF protein signal transduction [GO:0032012]; positive regulation of GTPase activity [GO:0043547]
MDBSrug1_03803.1	NaN	NaN	0.0141765	0.018806				serine-type endopeptidase activity [GO:0004252]	integral component of membrane [GO:0016021]; COPI-coated vesicle [GO:0030137]	proteolysis [GO:0006508]; retrograde vesicle-mediated transport, Golgi to ER [GO:0006890]
MDBSrug1_01337.1	NaN	NaN	0.0131819	0.0369605				ATP binding [GO:0005524]; ATPase activity, coupled to transmembrane movement of substances [GO:0042626]	mitochondrial inner membrane [GO:0005743]; integral component of membrane [GO:0016021]	transmembrane transport [GO:0055085]; cellular response to hydrogen peroxide [GO:0070301]
MDBSrug1_04542.1	NaN	NaN	0.0123102	0.0529941				DNA replication origin binding [GO:0003688]; single-stranded DNA binding [GO:0003697]; RNA helicase activity [GO:0003724]; single-stranded RNA binding [GO:0003727]; ATP binding [GO:0005524]; protein transporter activity [GO:0008565]; four-way junction helicase activity [GO:0009378]; 3'-5' DNA/RNA helicase activity [GO:0033679]; metal ion binding [GO:0046872]; single-stranded DNA-dependent ATP-dep…	nuclear chromatin [GO:0000790]; nuclear pre-replicative complex [GO:0005656]; cytosol [GO:0005829]; DNA replication preinitiation complex [GO:0031261]; replication fork protection complex [GO:0031298]; MCM complex [GO:0042555]; mitochondrial intermembrane space protein transporter complex [GO:0042719]; MCM core complex [GO:0097373]	double-strand break repair via break-induced replication [GO:0000727]; pre-replicative complex assembly involved in nuclear cell cycle DNA replication [GO:0006267]; DNA unwinding involved in DNA replication [GO:0006268]; DNA replication initiation [GO:0006270]; DNA strand elongation involved in DNA replication [GO:0006271]; protein import into mitochondrial inner membrane [GO:0045039]; mitotic DN…
MDBSrug1_01388.1	NaN	NaN	0.0107826	0.037301				motor activity [GO:0003774]; actin binding [GO:0003779]; ATP binding [GO:0005524]	myosin complex [GO:0016459]; actin cortical patch [GO:0030479]; medial cortex [GO:0031097]; mating projection tip [GO:0043332]; plasma membrane raft [GO:0044853]; cell tip [GO:0051286]	actin cortical patch assembly [GO:0000147]; regulation of endocytosis [GO:0030100]; plasma membrane raft distribution [GO:0044855]; positive regulation of actin nucleation [GO:0051127]; actin cortical patch localization [GO:0051666]; establishment or maintenance of cell polarity regulating cell shape [GO:0071963]
MDBSrug1_02771.1	NaN	NaN	0.00949144	0.00926292				chromatin binding [GO:0003682]; transcription factor activity, sequence-specific DNA binding [GO:0003700]; zinc ion binding [GO:0008270]; sequence-specific DNA binding [GO:0043565]	nucleus [GO:0005634]	regulation of transcription, DNA-templated [GO:0006355]
MDBSrug1_00395.1	NaN	NaN	0.00932463	0.101849				RNA-directed DNA polymerase activity [GO:0003964]; phosphorylase kinase activity [GO:0004689]; calmodulin binding [GO:0005516]; ATP binding [GO:0005524]	phosphorylase kinase complex [GO:0005964]	glycogen biosynthetic process [GO:0005978]; RNA-dependent DNA biosynthetic process [GO:0006278]; protein phosphorylation [GO:0006468]
MDBSrug1_08902.4	NaN	NaN	0.00912453	0.0262639				metal ion binding [GO:0046872]		regulation of transcription, DNA-templated [GO:0006355]
MDBSrug1_10210.1	NaN	NaN	0.00887561	0.00541861				RNA binding [GO:0003723]	mRNA cleavage and polyadenylation specificity factor complex [GO:0005847]	mRNA polyadenylation [GO:0006378]; mRNA cleavage [GO:0006379]
MDBSrug1_04895.1	NaN	NaN	0.00874394	0.030898
MDBSrug1_05477.1	NaN	NaN	0.00619447	0.00394024
MDBSrug1_05401.2	NaN	NaN	0.00489588	0.240604
MDBSrug1_04460.1	NaN	NaN	0.00376373	0.0484087				structural constituent of ribosome [GO:0003735]	mitochondrial small ribosomal subunit [GO:0005763]
MDBSrug1_05415.1	NaN	NaN	0.00361837	0.0085445				nucleic acid binding [GO:0003676]; RNA-DNA hybrid ribonuclease activity [GO:0004523]		RNA phosphodiester bond hydrolysis, endonucleolytic [GO:0090502]
MDBSrug1_01092.1	NaN	NaN	0.00350205	0.0112049
MDBSrug1_08237.1	NaN	NaN	0.00309165	0.0264565					intracellular part [GO:0044424]	conjugation with cellular fusion [GO:0000747]; cell morphogenesis [GO:0000902]; regulation of cellular process [GO:0050794]
MDBSrug1_07254.1	NaN	NaN	0.00119976	0.0164841						single-organism process [GO:0044699]; biological regulation [GO:0065007]
