# Supplementary material for: Whole Genome Sequence of an Edible Mushroom Stropharia rugosoannulata (Daqiugaigu)
Source: J Fungi (Basel). 2022 Jan 20;8(2):99. doi: 10.3390/jof8020099 (PMC8880121; doi:10.3390/jof8020099)
Supplement: Supplementary file 1 [file jof-08-00099-s001.zip › Supplementary File(s)/Table S8.xlsx]

## Sheet: Table
Table S8 KEGG enrichment of DAPs.
Cap-up DAPs enriched KEGG pathways	Number of DAPs		Cap-down DAPs enriched KEGG pathways	Number of DAPs
Metabolic pathways	69		Metabolic pathways	53
Biosynthesis of secondary metabolites	23		Biosynthesis of secondary metabolites	31
Biosynthesis of cofactors	11		Biosynthesis of cofactors	11
Carbon metabolism	9		Carbon metabolism	11
Biosynthesis of amino acids	9		Biosynthesis of amino acids	11
Spliceosome	8		Oxidative phosphorylation	7
Alanine, aspartate and glutamate metabolism	7		2-Oxocarboxylic acid metabolism	5
Amino sugar and nucleotide sugar metabolism	7		Glutathione metabolism	5
Peroxisome	7		Glycolysis / Gluconeogenesis	5
Fatty acid metabolism	7		Butanoate metabolism	4
Fatty acid degradation	6		Peroxisome	4
Purine metabolism	5		Glycine, serine and threonine metabolism	4
Propanoate metabolism	5		Citrate cycle (TCA cycle	4
Starch and sucrose metabolism	5		Glyoxylate and dicarboxylate metabolism	4
Valine, leucine and isoleucine degradation	5		Ribosome	4
beta-Alanine metabolism	5		Endocytosis	3
Fatty acid biosynthesis	4		Valine, leucine and isoleucine biosynthesis	3
Arginine biosynthesis	4		Thiamine metabolism	3
Pyruvate metabolism	4		Fatty acid metabolism	3
Glycerolipid metabolism	4		Fructose and mannose metabolism	3
Pyrimidine metabolism	4		Tyrosine metabolism	3
Histidine metabolism	4		Propanoate metabolism	3
Nucleocytoplasmic transport	4		Valine, leucine and isoleucine degradation	3
Various types of N-glycan biosynthesis	3		Pyruvate metabolism	3
Biosynthesis of nucleotide sugars	3		Tryptophan metabolism	3
Arginine and proline metabolism	3		beta-Alanine metabolism	3
Methane metabolism	3		Protein processing in endoplasmic reticulum	2
Pantothenate and CoA biosynthesis	3		Biotin metabolism	2
Protein processing in endoplasmic reticulum	3		Proteasome	2
Autophagy	3		Cysteine and methionine metabolism	2
Cysteine and methionine metabolism	3		Phagosome	2
Biosynthesis of unsaturated fatty acids	3		Porphyrin and chlorophyll metabolism	2
Proteasome	3		Ubiquinone and other terpenoid-quinone biosynthesis	2
mRNA surveillance pathway	3		Fatty acid degradation	2
Glycolysis / Gluconeogenesis	3		Autophagy	2
Pentose and glucuronate interconversions	3		Amino sugar and nucleotide sugar metabolism	2
Sphingolipid metabolism	2		Lysine biosynthesis	2
Cell cycle	2		Starch and sucrose metabolism	2
Nitrogen metabolism	2		Alanine, aspartate and glutamate metabolism	2
Oxidative phosphorylation	2		Lysine degradation	2
Other glycan degradation	2		Purine metabolism	2
Tryptophan metabolism	2		Fatty acid biosynthesis	2
Glycine, serine and threonine metabolism	2		C5-Branched dibasic acid metabolism	2
N-Glycan biosynthesis	2		Pantothenate and CoA biosynthesis	2
SNARE interactions in vesicular transport	2		Pyrimidine metabolism	1
Lysine degradation	2		Phenylalanine, tyrosine and tryptophan biosynthesis	1
alpha-Linolenic acid metabolism	2		Fatty acid elongation	1
Riboflavin metabolism	2		ABC transporters	1
Galactose metabolism	2		Phenylalanine metabolism	1
Endocytosis	2		Cyanoamino acid metabolism	1
2-Oxocarboxylic acid metabolism	2		Galactose metabolism	1
Ascorbate and aldarate metabolism	2		Meiosis	1
Nicotinate and nicotinamide metabolism	2		Pentose and glucuronate interconversions	1
Phenylalanine, tyrosine and tryptophan biosynthesis	2		Glycerophospholipid metabolism	1
Glycosphingolipid biosynthesis	2		Histidine metabolism	1
Mitophagy	1		Inositol phosphate metabolism	1
Glyoxylate and dicarboxylate metabolism	1		D-Amino acid metabolism	1
Ubiquitin mediated proteolysis	1		Cell cycle	1
Terpenoid backbone biosynthesis	1		Biosynthesis of nucleotide sugars	1
Sulfur metabolism	1		Arginine and proline metabolism	1
Phosphatidylinositol signaling system	1		Protein export	1
Citrate cycle	1		Methane metabolism	1
Aminoacyl-tRNA biosynthesis	1		Steroid biosynthesis	1
Butanoate metabolism	1		Taurine and hypotaurine metabolism	1
DNA replication	1		Nicotinate and nicotinamide metabolism	1
Phagosome	1		Pentose phosphate pathway	1
Valine, leucine and isoleucine biosynthesis	1		MAPK signaling pathway	1
Fructose and mannose metabolism	1
Taurine and hypotaurine metabolism	1
Nucleotide excision repair	1
Cyanoamino acid metabolism	1
Ether lipid metabolism	1
Glutathione metabolism	1
Thiamine metabolism	1
RNA degradation	1
Arachidonic acid metabolism	1
Mismatch repair	1
Pentose phosphate pathway	1
Base excision repair	1
Inositol phosphate metabolism	1
Glycerophospholipid metabolism	1
Glycosaminoglycan degradation	1
Atrazine degradation	1
Folate biosynthesis	1
Glycosphingolipid biosynthesis ganglio series	1
